# Supplementary material for: CEP78 functions downstream of CEP350 to control biogenesis of primary cilia by negatively regulating CP110 levels
Source: eLife journal article supplement (doi:10.7554/elife.63731), 2021-07-14

Figure 2-figure supplement 1-source data 1

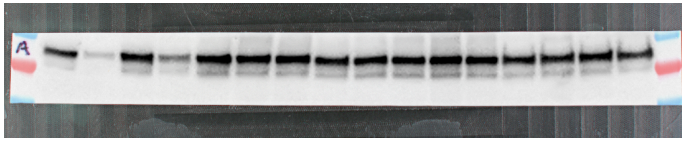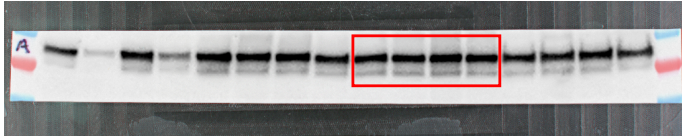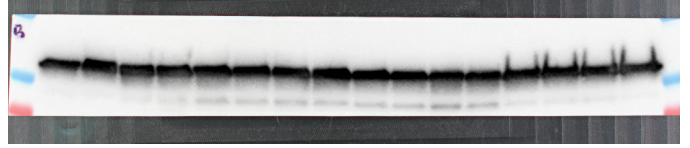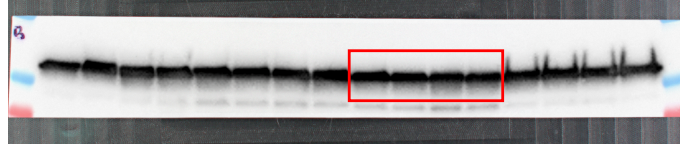

Supplement: fig2-figsupp1-data1 [file elife-63731-fig2-figsupp1-data1-v2.pdf]
