# Supplementary material for: CEP78 functions downstream of CEP350 to control biogenesis of primary cilia by negatively regulating CP110 levels
Source: eLife. 2021 Jul 14;10:e63731. doi: 10.7554/eLife.63731 (PMC8354638; doi:10.7554/eLife.63731)
Supplement: Figure 3—source data 1. — 293T cells grown in Stable Isotope Labeling by Amino acids in Cell culture (SILAC) medium and expressing FLAG-CEP78 wildtype (WT), FLAG-CEP78L150S, or FLAG-Ap80 (negative control) were subjected to FLAG immunoprecipitation (IP) and pellets analyzed by mass spectrometry. [file elife-63731-fig3-data1.xlsx]

## Sheet: evidence_Cep78
Sequence	Length	K Count	R Count	Modifications	Modified sequence	Oxidation (M) Probabilities	Oxidation (M) Score Diffs	Acetyl (Protein N-term)	Oxidation (M)	Missed cleavages	Proteins	Leading proteins	Leading razor protein	Type	Labeling State	Raw file	Fraction	Experiment	MS/MS m/z	Charge	m/z	Mass	Resolution	Uncalibrated - Calibrated m/z [ppm]	Uncalibrated - Calibrated m/z [Da]	Mass error [ppm]	Mass error [Da]	Uncalibrated mass error [ppm]	Uncalibrated mass error [Da]	Max intensity m/z 0	Max intensity m/z 1	Max intensity m/z 2	Retention time	Retention length	Calibrated retention time	Calibrated retention time start	Calibrated retention time finish	Retention time calibration	Match time difference	Match m/z difference	Match q-value	Match score	Number of data points	Number of scans	Number of isotopic peaks	PIF	Fraction of total spectrum	Base peak fraction	PEP
SSLHLLSHETK	11	1	0	Unmodified	_SSLHLLSHETK_			0	0	0	sp|O95684-2|FR1OP_HUMAN;sp|O95684|FR1OP_HUMAN	sp|O95684-2|FR1OP_HUMAN	sp|O95684-2|FR1OP_HUMAN	ISO-MSMS	0	16062020_SKO_IP_Cep78	1	exp_1	417.895	3	417.895	1250.66	NaN	NaN	NaN	-0.097665	-4.0814e-05	NaN	NaN	NaN	NaN	NaN	13.527	0.28539	13.527	13.355	13.64	1.7764e-15								0	0	0	6.2247e-06
SSLHLLSHETK	11	1	0	Unmodified	_SSLHLLSHETK_			0	0	0	sp|O95684-2|FR1OP_HUMAN;sp|O95684|FR1OP_HUMAN	sp|O95684-2|FR1OP_HUMAN	sp|O95684-2|FR1OP_HUMAN	ISO-MSMS	2	16062020_SKO_IP_Cep78	1	exp_1	420.567	3	417.895	1250.66	NaN	NaN	NaN	2.285	0.00095491	NaN	NaN	NaN	NaN	NaN	13.503	0.38607	13.503	13.271	13.657	0								0	0	0	0.00025415
VVEELTR	7	0	1	Unmodified	_VVEELTR_			0	0	0	sp|Q16531|DDB1_HUMAN;sp|Q16531-2|DDB1_HUMAN	sp|Q16531|DDB1_HUMAN	sp|Q16531|DDB1_HUMAN	ISO-MSMS	0	16062020_SKO_IP_Cep78	1	exp_1	423.24	2	423.24	844.465	NaN	NaN	NaN	-0.21216	-8.9793e-05	NaN	NaN	NaN	NaN	NaN	14.945	0.29476	14.945	14.865	15.16	0								0	0	0	0.015425
VIPLDRDNK	9	1	1	Unmodified	_VIPLDRDNK_			0	0	1	sp|Q16531|DDB1_HUMAN	sp|Q16531|DDB1_HUMAN	sp|Q16531|DDB1_HUMAN	ISO-MSMS	0	16062020_SKO_IP_Cep78	1	exp_1	357.205	3	357.205	1068.59	NaN	NaN	NaN	0.34516	0.00012329	NaN	NaN	NaN	NaN	NaN	14.034	0.62086	14.034	13.758	14.379	-1.7764e-15								0	0	0	0.0068923
GLGETATVLTK	11	1	0	Unmodified	_GLGETATVLTK_			0	0	0	sp|Q9Y4B6-3|VPRBP_HUMAN;sp|Q9Y4B6-2|VPRBP_HUMAN;sp|Q9Y4B6|VPRBP_HUMAN	sp|Q9Y4B6-3|VPRBP_HUMAN	sp|Q9Y4B6-3|VPRBP_HUMAN	ISO-MSMS	0	16062020_SKO_IP_Cep78	1	exp_1	545.813	2	545.311	1088.61	NaN	NaN	NaN	0.76738	0.00041846	NaN	NaN	NaN	NaN	NaN	28.247	0.31725	28.247	28.002	28.319	0								0	0	0	0.0062473
SPFGSSFR	8	0	1	Unmodified	_SPFGSSFR_			0	0	0	sp|Q9Y4B6-3|VPRBP_HUMAN;sp|Q9Y4B6-2|VPRBP_HUMAN;sp|Q9Y4B6|VPRBP_HUMAN	sp|Q9Y4B6-3|VPRBP_HUMAN	sp|Q9Y4B6-3|VPRBP_HUMAN	ISO-MSMS	0	16062020_SKO_IP_Cep78	1	exp_1	442.718	2	442.717	883.419	NaN	NaN	NaN	-1.339	-0.0005928	NaN	NaN	NaN	NaN	NaN	24.436	0.50837	24.436	24.161	24.669	0								0	0	0	0.012669
TTVVVHVDSK	10	1	0	Acetyl (Protein N-term)	_(ac)TTVVVHVDSK_			1	0	0	sp|Q9Y4B6-3|VPRBP_HUMAN;sp|Q9Y4B6-2|VPRBP_HUMAN;sp|Q9Y4B6|VPRBP_HUMAN	sp|Q9Y4B6-3|VPRBP_HUMAN	sp|Q9Y4B6-3|VPRBP_HUMAN	MSMS	2	16062020_SKO_IP_Cep78	1	exp_1	567.817	2	563.809	1125.6	NaN	NaN	NaN	NaN	NaN	NaN	NaN	NaN	NaN	NaN	26.984	1	26.984	26.484	27.484	0								0	0	0	0.024553
YAAELIER	8	0	1	Unmodified	_YAAELIER_			0	0	0	sp|Q9Y4B6-3|VPRBP_HUMAN;sp|Q9Y4B6-2|VPRBP_HUMAN;sp|Q9Y4B6|VPRBP_HUMAN	sp|Q9Y4B6-3|VPRBP_HUMAN	sp|Q9Y4B6-3|VPRBP_HUMAN	ISO-MSMS	0	16062020_SKO_IP_Cep78	1	exp_1	482.756	2	482.759	963.503	NaN	NaN	NaN	-6.1496	-0.0029688	NaN	NaN	NaN	NaN	NaN	25.321	0.15205	25.321	25.263	25.415	3.5527e-15								0	0	0	0.0099155
GDIAHIYDIQTGNK	14	1	0	Unmodified	_GDIAHIYDIQTGNK_			0	0	0	sp|Q9Y4B6-3|VPRBP_HUMAN;sp|Q9Y4B6-2|VPRBP_HUMAN;sp|Q9Y4B6|VPRBP_HUMAN	sp|Q9Y4B6-3|VPRBP_HUMAN	sp|Q9Y4B6-3|VPRBP_HUMAN	ISO-MSMS	2	16062020_SKO_IP_Cep78	1	exp_1	518.602	3	515.595	1543.76	NaN	NaN	NaN	1.0711	0.00055223	NaN	NaN	NaN	NaN	NaN	35.226	0.2896	35.226	35.109	35.399	0								0	0	0	0.025718
HSFTEDHYVEFSK	13	1	0	Unmodified	_HSFTEDHYVEFSK_			0	0	0	sp|Q9Y4B6-3|VPRBP_HUMAN;sp|Q9Y4B6-2|VPRBP_HUMAN;sp|Q9Y4B6|VPRBP_HUMAN	sp|Q9Y4B6-3|VPRBP_HUMAN	sp|Q9Y4B6-3|VPRBP_HUMAN	ISO-MSMS	0	16062020_SKO_IP_Cep78	1	exp_1	542.579	3	542.579	1624.72	NaN	NaN	NaN	0.71724	0.00038916	NaN	NaN	NaN	NaN	NaN	26.668	0.237	26.668	26.549	26.786	0								0	0	0	0.020219
SDHGAYSQSPAIK	13	1	0	Unmodified	_SDHGAYSQSPAIK_			0	0	0	sp|Q9Y4B6-3|VPRBP_HUMAN;sp|Q9Y4B6-2|VPRBP_HUMAN;sp|Q9Y4B6|VPRBP_HUMAN	sp|Q9Y4B6-3|VPRBP_HUMAN	sp|Q9Y4B6-3|VPRBP_HUMAN	ISO-MSMS	0	16062020_SKO_IP_Cep78	1	exp_1	454.22	3	454.221	1359.64	NaN	NaN	NaN	-0.56156	-0.00025507	NaN	NaN	NaN	NaN	NaN	11.214	0.40349	11.214	11.049	11.453	1.7764e-15								0	0	0	2.1217e-14
AAHQSSLLR	9	0	1	Unmodified	_AAHQSSLLR_			0	0	0	sp|Q5VT06|CE350_HUMAN	sp|Q5VT06|CE350_HUMAN	sp|Q5VT06|CE350_HUMAN	ISO-MSMS	0	16062020_SKO_IP_Cep78	1	exp_1	491.776	2	491.775	981.536	NaN	NaN	NaN	1.8127	0.00089143	NaN	NaN	NaN	NaN	NaN	6.5443	0.083832	6.5443	6.5024	6.5863	0								0	0	0	0.015709
AEQEALESQR	10	0	1	Unmodified	_AEQEALESQR_			0	0	0	sp|Q5VT06|CE350_HUMAN	sp|Q5VT06|CE350_HUMAN	sp|Q5VT06|CE350_HUMAN	MSMS	0	16062020_SKO_IP_Cep78	1	exp_1	580.781	2	580.781	1159.55	NaN	NaN	NaN	NaN	NaN	NaN	NaN	NaN	NaN	NaN	9.7499	1	9.7499	9.2499	10.25	0								0	0	0	0.00040164
ATAASLSSR	9	0	1	Unmodified	_ATAASLSSR_			0	0	0	sp|Q5VT06|CE350_HUMAN	sp|Q5VT06|CE350_HUMAN	sp|Q5VT06|CE350_HUMAN	MSMS	0	16062020_SKO_IP_Cep78	1	exp_1	432.232	2	432.233	862.451	NaN	NaN	NaN	NaN	NaN	NaN	NaN	NaN	NaN	NaN	6.6244	1	6.6244	6.1244	7.1244	0								0	0	0	0.0089916
DDNEDVFSAR	10	0	1	Unmodified	_DDNEDVFSAR_			0	0	0	sp|Q5VT06|CE350_HUMAN	sp|Q5VT06|CE350_HUMAN	sp|Q5VT06|CE350_HUMAN	ISO-MSMS	0	16062020_SKO_IP_Cep78	1	exp_1	584.251	2	584.249	1166.48	NaN	NaN	NaN	1.9388	0.0011327	NaN	NaN	NaN	NaN	NaN	26.125	0.47449	26.125	25.94	26.414	0								0	0	0	0.021693
DLPLDSENVQK	11	1	0	Unmodified	_DLPLDSENVQK_			0	0	0	sp|Q5VT06|CE350_HUMAN	sp|Q5VT06|CE350_HUMAN	sp|Q5VT06|CE350_HUMAN	MSMS	0	16062020_SKO_IP_Cep78	1	exp_1	629.319	2	629.32	1256.62	NaN	NaN	NaN	NaN	NaN	NaN	NaN	NaN	NaN	NaN	29.927	1	29.927	29.427	30.427	0								0	0	0	0.0075979
DTVNQLQQIK	10	1	0	Unmodified	_DTVNQLQQIK_			0	0	0	sp|Q5VT06|CE350_HUMAN	sp|Q5VT06|CE350_HUMAN	sp|Q5VT06|CE350_HUMAN	ISO-MSMS	2	16062020_SKO_IP_Cep78	1	exp_1	597.834	2	593.825	1185.64	NaN	NaN	NaN	0.029244	1.7366e-05	NaN	NaN	NaN	NaN	NaN	26.421	0.27121	26.421	26.261	26.533	0								0	0	0	0.0090464
GLDIESTSK	9	1	0	Unmodified	_GLDIESTSK_			0	0	0	sp|Q5VT06|CE350_HUMAN	sp|Q5VT06|CE350_HUMAN	sp|Q5VT06|CE350_HUMAN	ISO-MSMS	0	16062020_SKO_IP_Cep78	1	exp_1	475.247	2	475.245	948.476	NaN	NaN	NaN	-0.47745	-0.00022691	NaN	NaN	NaN	NaN	NaN	17.301	0.23618	17.301	17.173	17.41	0								0	0	0	0.025081
ILGPAPR	7	0	1	Unmodified	_ILGPAPR_			0	0	0	sp|Q5VT06|CE350_HUMAN	sp|Q5VT06|CE350_HUMAN	sp|Q5VT06|CE350_HUMAN	ISO-MSMS	0	16062020_SKO_IP_Cep78	1	exp_1	362.23	2	362.229	722.444	NaN	NaN	NaN	-0.62823	-0.00022756	NaN	NaN	NaN	NaN	NaN	14.29	0.20123	14.29	14.211	14.413	0								0	0	0	0.027111
ITANEDPPVISK	12	1	0	Unmodified	_ITANEDPPVISK_			0	0	0	sp|Q5VT06|CE350_HUMAN	sp|Q5VT06|CE350_HUMAN	sp|Q5VT06|CE350_HUMAN	ISO-MSMS	0	16062020_SKO_IP_Cep78	1	exp_1	642.348	2	642.346	1282.68	NaN	NaN	NaN	2.0168	0.0012955	NaN	NaN	NaN	NaN	NaN	23.464	0.20263	23.464	23.4	23.602	0								0	0	0	0.00081215
LASSLPDNK	9	1	0	Unmodified	_LASSLPDNK_			0	0	0	sp|Q5VT06|CE350_HUMAN	sp|Q5VT06|CE350_HUMAN	sp|Q5VT06|CE350_HUMAN	ISO-MSMS	0	16062020_SKO_IP_Cep78	1	exp_1	472.757	2	472.756	943.497	NaN	NaN	NaN	-0.18886	-8.9287e-05	NaN	NaN	NaN	NaN	NaN	14.131	0.20155	14.131	14.027	14.228	-1.7764e-15								0	0	0	6.7635e-11
NPNNLDEIK	9	1	0	Unmodified	_NPNNLDEIK_			0	0	0	sp|Q5VT06|CE350_HUMAN	sp|Q5VT06|CE350_HUMAN	sp|Q5VT06|CE350_HUMAN	ISO-MSMS	2	16062020_SKO_IP_Cep78	1	exp_1	532.777	2	528.77	1055.52	NaN	NaN	NaN	-1.7058	-0.00090199	NaN	NaN	NaN	NaN	NaN	16.939	0.20276	16.939	16.836	17.039	0								0	0	0	0.015262
QDTVELQNQK	10	1	0	Unmodified	_QDTVELQNQK_			0	0	0	sp|Q5VT06|CE350_HUMAN	sp|Q5VT06|CE350_HUMAN	sp|Q5VT06|CE350_HUMAN	ISO-MSMS	2	16062020_SKO_IP_Cep78	1	exp_1	605.813	2	601.804	1201.59	NaN	NaN	NaN	3.3021	0.0019872	NaN	NaN	NaN	NaN	NaN	13.058	0.18514	13.058	12.951	13.136	0								0	0	0	0.013025
SPSVSLSQSK	10	1	0	Unmodified	_SPSVSLSQSK_			0	0	0	sp|Q5VT06|CE350_HUMAN	sp|Q5VT06|CE350_HUMAN	sp|Q5VT06|CE350_HUMAN	ISO-MSMS	2	16062020_SKO_IP_Cep78	1	exp_1	514.28	2	510.272	1018.53	NaN	NaN	NaN	1.7088	0.00087198	NaN	NaN	NaN	NaN	NaN	14.163	0.28541	14.163	14.01	14.295	0								0	0	0	0.020609
SPSVSLSQSK	10	1	0	Unmodified	_SPSVSLSQSK_			0	0	0	sp|Q5VT06|CE350_HUMAN	sp|Q5VT06|CE350_HUMAN	sp|Q5VT06|CE350_HUMAN	ISO-MSMS	0	16062020_SKO_IP_Cep78	1	exp_1	510.273	2	510.272	1018.53	NaN	NaN	NaN	1.3786	0.00070347	NaN	NaN	NaN	NaN	NaN	14.166	0.38599	14.166	14.027	14.413	1.7764e-15								0	0	0	0.021281
AALRHIENK	9	1	1	Unmodified	_AALRHIENK_			0	0	1	sp|Q5VT06|CE350_HUMAN	sp|Q5VT06|CE350_HUMAN	sp|Q5VT06|CE350_HUMAN	ISO-MSMS	0	16062020_SKO_IP_Cep78	1	exp_1	351.54	3	351.205	1050.59	NaN	NaN	NaN	1.0043	0.00035271	NaN	NaN	NaN	NaN	NaN	0.89546	0.23561	0.89546	0.76475	1.0004	0								0	0	0	0.026872
IKPLTPLHR	9	1	1	Unmodified	_IKPLTPLHR_			0	0	1	sp|Q5VT06|CE350_HUMAN	sp|Q5VT06|CE350_HUMAN	sp|Q5VT06|CE350_HUMAN	ISO-MSMS	0	16062020_SKO_IP_Cep78	1	exp_1	358.899	3	358.898	1073.67	NaN	NaN	NaN	1.1511	0.00041311	NaN	NaN	NaN	NaN	NaN	14.224	0.15121	14.224	14.127	14.279	0								0	0	0	0.0037932
IKPLTPLHR	9	1	1	Unmodified	_IKPLTPLHR_			0	0	1	sp|Q5VT06|CE350_HUMAN	sp|Q5VT06|CE350_HUMAN	sp|Q5VT06|CE350_HUMAN	ISO-MSMS	2	16062020_SKO_IP_Cep78	1	exp_1	364.906	3	358.898	1073.67	NaN	NaN	NaN	-0.23381	-8.3914e-05	NaN	NaN	NaN	NaN	NaN	14.228	0.21831	14.228	14.077	14.295	0								0	0	0	0.026114
RFSPAGLHHR	10	0	2	Unmodified	_RFSPAGLHHR_			0	0	1	sp|Q5VT06|CE350_HUMAN	sp|Q5VT06|CE350_HUMAN	sp|Q5VT06|CE350_HUMAN	ISO-MSMS	0	16062020_SKO_IP_Cep78	1	exp_1	393.217	3	393.216	1176.63	NaN	NaN	NaN	0.87955	0.00034585	NaN	NaN	NaN	NaN	NaN	6.293	0.11725	6.293	6.2009	6.3181	0								0	0	0	0.021933
RLQELYRK	8	1	2	Unmodified	_RLQELYRK_			0	0	2	sp|Q5VT06|CE350_HUMAN	sp|Q5VT06|CE350_HUMAN	sp|Q5VT06|CE350_HUMAN	ISO-MSMS	2	16062020_SKO_IP_Cep78	1	exp_1	378.565	3	369.221	1104.64	NaN	NaN	NaN	1.8823	0.00069497	NaN	NaN	NaN	NaN	NaN	8.7236	0.22057	8.7236	8.56	8.7805	0								0	0	0	0.016484
RLQELYRK	8	1	2	Unmodified	_RLQELYRK_			0	0	2	sp|Q5VT06|CE350_HUMAN	sp|Q5VT06|CE350_HUMAN	sp|Q5VT06|CE350_HUMAN	ISO-MSMS	0	16062020_SKO_IP_Cep78	1	exp_1	369.89	3	369.221	1104.64	NaN	NaN	NaN	-0.59029	-0.00021795	NaN	NaN	NaN	NaN	NaN	8.7057	0.25413	8.7057	8.56	8.8141	0								0	0	0	0.0013201
RRLDAEEAEIR	11	0	3	Unmodified	_RRLDAEEAEIR_			0	0	2	sp|Q5VT06|CE350_HUMAN	sp|Q5VT06|CE350_HUMAN	sp|Q5VT06|CE350_HUMAN	ISO-MSMS	0	16062020_SKO_IP_Cep78	1	exp_1	453.244	3	453.244	1356.71	NaN	NaN	NaN	-0.28213	-0.00012788	NaN	NaN	NaN	NaN	NaN	13.847	0.16775	13.847	13.758	13.926	0								0	0	0	4.163e-06
TLLEEPSHQHVTQETQAK	18	1	0	Unmodified	_TLLEEPSHQHVTQETQAK_			0	0	0	sp|Q5VT06|CE350_HUMAN	sp|Q5VT06|CE350_HUMAN	sp|Q5VT06|CE350_HUMAN	ISO-MSMS	0	16062020_SKO_IP_Cep78	1	exp_1	693.019	3	692.683	2075.03	NaN	NaN	NaN	1.4127	0.00097854	NaN	NaN	NaN	NaN	NaN	16.727	0.13453	16.727	16.635	16.769	0								0	0	0	0.00022924
IVGLATK	7	1	0	Unmodified	_IVGLATK_			0	0	0	sp|Q5JTW2-5|CEP78_HUMAN;sp|Q5JTW2-2|CEP78_HUMAN	sp|Q5JTW2-5|CEP78_HUMAN	sp|Q5JTW2-5|CEP78_HUMAN	ISO-MSMS	0	16062020_SKO_IP_Cep78	1	exp_1	702.265	1	701.456	700.448	NaN	NaN	NaN	-0.39718	-0.0002786	NaN	NaN	NaN	NaN	NaN	16.253	0.75764	16.253	16.062	16.819	0								0	0	0	0.018174
ALEDEKPEPK	10	2	0	Unmodified	_ALEDEKPEPK_			0	0	1	sp|Q5JTW2-5|CEP78_HUMAN;sp|Q5JTW2-2|CEP78_HUMAN;sp|Q5JTW2|CEP78_HUMAN;sp|Q5JTW2-3|CEP78_HUMAN	sp|Q5JTW2-5|CEP78_HUMAN	sp|Q5JTW2-5|CEP78_HUMAN	ISO-MSMS	0	16062020_SKO_IP_Cep78	1	exp_1	578.296	2	578.298	1154.58	NaN	NaN	NaN	-0.073789	-4.2672e-05	NaN	NaN	NaN	NaN	NaN	8.9414	0.57374	8.9414	8.56	9.1337	0								0	0	0	0.00022776
ALEDEKPEPK	10	2	0	Unmodified	_ALEDEKPEPK_			0	0	1	sp|Q5JTW2-5|CEP78_HUMAN;sp|Q5JTW2-2|CEP78_HUMAN;sp|Q5JTW2|CEP78_HUMAN;sp|Q5JTW2-3|CEP78_HUMAN	sp|Q5JTW2-5|CEP78_HUMAN	sp|Q5JTW2-5|CEP78_HUMAN	ISO-MSMS	2	16062020_SKO_IP_Cep78	1	exp_1	586.812	2	578.298	1154.58	NaN	NaN	NaN	-0.87006	-0.00050316	NaN	NaN	NaN	NaN	NaN	8.934	0.50891	8.934	8.5924	9.1013	0								0	0	0	0.01623
EEELSRNSR	9	0	2	Unmodified	_EEELSRNSR_			0	0	1	sp|Q5JTW2-5|CEP78_HUMAN;sp|Q5JTW2-2|CEP78_HUMAN;sp|Q5JTW2|CEP78_HUMAN;sp|Q5JTW2-3|CEP78_HUMAN	sp|Q5JTW2-5|CEP78_HUMAN	sp|Q5JTW2-5|CEP78_HUMAN	ISO-MSMS	0	16062020_SKO_IP_Cep78	1	exp_1	560.274	2	560.273	1118.53	NaN	NaN	NaN	0.74322	0.00041641	NaN	NaN	NaN	NaN	NaN	5.874	0.067838	5.874	5.8313	5.8992	0								0	0	0	2.9283e-17
EERVIRLK	8	1	2	Unmodified	_EERVIRLK_			0	0	2	sp|Q5JTW2-5|CEP78_HUMAN;sp|Q5JTW2-2|CEP78_HUMAN;sp|Q5JTW2|CEP78_HUMAN;sp|Q5JTW2-3|CEP78_HUMAN	sp|Q5JTW2-5|CEP78_HUMAN	sp|Q5JTW2-5|CEP78_HUMAN	ISO-MSMS	0	16062020_SKO_IP_Cep78	1	exp_1	521.822	2	521.822	1041.63	NaN	NaN	NaN	-0.82063	-0.00042822	NaN	NaN	NaN	NaN	NaN	11.442	0.21734	11.442	11.302	11.519	0								0	0	0	0.026292
EGVLDFNADR	10	0	1	Unmodified	_EGVLDFNADR_			0	0	0	sp|Q5JTW2-5|CEP78_HUMAN;sp|Q5JTW2-2|CEP78_HUMAN;sp|Q5JTW2|CEP78_HUMAN;sp|Q5JTW2-3|CEP78_HUMAN	sp|Q5JTW2-5|CEP78_HUMAN	sp|Q5JTW2-5|CEP78_HUMAN	ISO-MSMS	2	16062020_SKO_IP_Cep78	1	exp_1	572.962	2	568.273	1134.53	NaN	NaN	NaN	-1.1796	-0.00067034	NaN	NaN	NaN	NaN	NaN	40.835	0.52432	40.835	40.538	41.063	0								0	0	0	3.4539e-07
ERDLTILAK	9	1	1	Unmodified	_ERDLTILAK_			0	0	1	sp|Q5JTW2-5|CEP78_HUMAN;sp|Q5JTW2-2|CEP78_HUMAN;sp|Q5JTW2|CEP78_HUMAN;sp|Q5JTW2-3|CEP78_HUMAN	sp|Q5JTW2-5|CEP78_HUMAN	sp|Q5JTW2-5|CEP78_HUMAN	ISO-MSMS	0	16062020_SKO_IP_Cep78	1	exp_1	529.724	2	529.814	1057.61	NaN	NaN	NaN	0.27433	0.00014534	NaN	NaN	NaN	NaN	NaN	23.138	0.36862	23.138	22.981	23.349	0								0	0	0	3.7405e-11
IVGLATK	7	1	0	Unmodified	_IVGLATK_			0	0	0	sp|Q5JTW2-5|CEP78_HUMAN;sp|Q5JTW2-2|CEP78_HUMAN	sp|Q5JTW2-5|CEP78_HUMAN	sp|Q5JTW2-5|CEP78_HUMAN	ISO-MSMS	0	16062020_SKO_IP_Cep78	1	exp_1	351.232	2	351.231	700.448	NaN	NaN	NaN	-0.50148	-0.00017614	NaN	NaN	NaN	NaN	NaN	16.235	0.92623	16.235	16.045	16.971	0								0	0	0	0.020768
NPLIDHSMMK	10	1	0	2 Oxidation (M)	_NPLIDHSM(ox)M(ox)K_	NPLIDHSM(1)M(1)K	NPLIDHSM(92.2)M(92.2)K	0	2	0	sp|Q5JTW2-5|CEP78_HUMAN;sp|Q5JTW2-2|CEP78_HUMAN;sp|Q5JTW2|CEP78_HUMAN;sp|Q5JTW2-3|CEP78_HUMAN	sp|Q5JTW2-5|CEP78_HUMAN	sp|Q5JTW2-5|CEP78_HUMAN	ISO-MSMS	0	16062020_SKO_IP_Cep78	1	exp_1	609.287	2	609.286	1216.56	NaN	NaN	NaN	0.70769	0.00043118	NaN	NaN	NaN	NaN	NaN	12.236	0.70709	12.236	11.906	12.613	-1.7764e-15								0	0	0	0.0024846
NPLIDHSMMK	10	1	0	2 Oxidation (M)	_NPLIDHSM(ox)M(ox)K_	NPLIDHSM(1)M(1)K	NPLIDHSM(60.52)M(60.52)K	0	2	0	sp|Q5JTW2-5|CEP78_HUMAN;sp|Q5JTW2-2|CEP78_HUMAN;sp|Q5JTW2|CEP78_HUMAN;sp|Q5JTW2-3|CEP78_HUMAN	sp|Q5JTW2-5|CEP78_HUMAN	sp|Q5JTW2-5|CEP78_HUMAN	ISO-MSMS	2	16062020_SKO_IP_Cep78	1	exp_1	613.294	2	609.286	1216.56	NaN	NaN	NaN	-0.2415	-0.00014714	NaN	NaN	NaN	NaN	NaN	12.223	0.69031	12.223	11.923	12.613	-1.7764e-15								0	0	0	0.015586
QESFEGFIAR	10	0	1	Unmodified	_QESFEGFIAR_			0	0	0	sp|Q5JTW2-5|CEP78_HUMAN;sp|Q5JTW2-2|CEP78_HUMAN;sp|Q5JTW2|CEP78_HUMAN;sp|Q5JTW2-3|CEP78_HUMAN	sp|Q5JTW2-5|CEP78_HUMAN	sp|Q5JTW2-5|CEP78_HUMAN	ISO-MSMS	0	16062020_SKO_IP_Cep78	1	exp_1	592.265	2	592.291	1182.57	NaN	NaN	NaN	-0.07861	-4.656e-05	NaN	NaN	NaN	NaN	NaN	44.362	0.38358	44.362	44.172	44.556	7.1054e-15								0	0	0	3.0257e-19
QESFEGFIAR	10	0	1	Unmodified	_QESFEGFIAR_			0	0	0	sp|Q5JTW2-5|CEP78_HUMAN;sp|Q5JTW2-2|CEP78_HUMAN;sp|Q5JTW2|CEP78_HUMAN;sp|Q5JTW2-3|CEP78_HUMAN	sp|Q5JTW2-5|CEP78_HUMAN	sp|Q5JTW2-5|CEP78_HUMAN	ISO-MSMS	2	16062020_SKO_IP_Cep78	1	exp_1	596.796	2	592.291	1182.57	NaN	NaN	NaN	0.0097625	5.7822e-06	NaN	NaN	NaN	NaN	NaN	44.327	0.34926	44.327	44.155	44.505	0								0	0	0	0.015974
RVSELEHENAQLR	13	0	2	Unmodified	_RVSELEHENAQLR_			0	0	1	sp|Q5JTW2-5|CEP78_HUMAN;sp|Q5JTW2-2|CEP78_HUMAN;sp|Q5JTW2|CEP78_HUMAN;sp|Q5JTW2-3|CEP78_HUMAN	sp|Q5JTW2-5|CEP78_HUMAN	sp|Q5JTW2-5|CEP78_HUMAN	ISO-MSMS	2	16062020_SKO_IP_Cep78	1	exp_1	800.919	2	790.911	1579.81	NaN	NaN	NaN	-0.63501	-0.00050224	NaN	NaN	NaN	NaN	NaN	13.843	0.2684	13.843	13.742	14.01	0								0	0	0	1.0334e-107
TIILGSGHK	9	1	0	Unmodified	_TIILGSGHK_			0	0	0	sp|Q5JTW2-5|CEP78_HUMAN;sp|Q5JTW2-2|CEP78_HUMAN;sp|Q5JTW2|CEP78_HUMAN;sp|Q5JTW2-3|CEP78_HUMAN	sp|Q5JTW2-5|CEP78_HUMAN	sp|Q5JTW2-5|CEP78_HUMAN	ISO-MSMS	2	16062020_SKO_IP_Cep78	1	exp_1	467.285	2	463.277	924.539	NaN	NaN	NaN	-0.36569	-0.00016942	NaN	NaN	NaN	NaN	NaN	11.628	1.1104	11.628	11.486	12.597	0								0	0	0	0.013132
TIILGSGHK	9	1	0	Unmodified	_TIILGSGHK_			0	0	0	sp|Q5JTW2-5|CEP78_HUMAN;sp|Q5JTW2-2|CEP78_HUMAN;sp|Q5JTW2|CEP78_HUMAN;sp|Q5JTW2-3|CEP78_HUMAN	sp|Q5JTW2-5|CEP78_HUMAN	sp|Q5JTW2-5|CEP78_HUMAN	ISO-MSMS	0	16062020_SKO_IP_Cep78	1	exp_1	463.277	2	463.277	924.539	NaN	NaN	NaN	-0.45998	-0.0002131	NaN	NaN	NaN	NaN	NaN	11.651	1.6503	11.651	11.469	13.12	0								0	0	0	0.013132
TSIEQEALQEK	11	1	0	Unmodified	_TSIEQEALQEK_			0	0	0	sp|Q5JTW2-5|CEP78_HUMAN;sp|Q5JTW2-2|CEP78_HUMAN;sp|Q5JTW2|CEP78_HUMAN;sp|Q5JTW2-3|CEP78_HUMAN	sp|Q5JTW2-5|CEP78_HUMAN	sp|Q5JTW2-5|CEP78_HUMAN	ISO-MSMS	2	16062020_SKO_IP_Cep78	1	exp_1	642.334	2	638.325	1274.64	NaN	NaN	NaN	-1.7323	-0.0011058	NaN	NaN	NaN	NaN	NaN	25.762	0.45691	25.762	25.567	26.024	0								0	0	0	4.1284e-39
ALEDEKPEPK	10	2	0	Unmodified	_ALEDEKPEPK_			0	0	1	sp|Q5JTW2-5|CEP78_HUMAN;sp|Q5JTW2-2|CEP78_HUMAN;sp|Q5JTW2|CEP78_HUMAN;sp|Q5JTW2-3|CEP78_HUMAN	sp|Q5JTW2-5|CEP78_HUMAN	sp|Q5JTW2-5|CEP78_HUMAN	ISO-MSMS	2	16062020_SKO_IP_Cep78	1	exp_1	391.879	3	385.868	1154.58	NaN	NaN	NaN	0.38523	0.00014865	NaN	NaN	NaN	NaN	NaN	8.9287	0.49213	8.9287	8.5924	9.0845	0								0	0	0	0.0018285
ALEDEKPEPK	10	2	0	Unmodified	_ALEDEKPEPK_			0	0	1	sp|Q5JTW2-5|CEP78_HUMAN;sp|Q5JTW2-2|CEP78_HUMAN;sp|Q5JTW2|CEP78_HUMAN;sp|Q5JTW2-3|CEP78_HUMAN	sp|Q5JTW2-5|CEP78_HUMAN	sp|Q5JTW2-5|CEP78_HUMAN	ISO-MSMS	0	16062020_SKO_IP_Cep78	1	exp_1	386.219	3	385.868	1154.58	NaN	NaN	NaN	0.65054	0.00025102	NaN	NaN	NaN	NaN	NaN	8.9489	0.58936	8.9489	8.56	9.1493	0								0	0	0	0.0027686
ATIRIVGLATK	11	1	1	Unmodified	_ATIRIVGLATK_			0	0	1	sp|Q5JTW2-5|CEP78_HUMAN;sp|Q5JTW2-2|CEP78_HUMAN	sp|Q5JTW2-5|CEP78_HUMAN	sp|Q5JTW2-5|CEP78_HUMAN	ISO-MSMS	0	16062020_SKO_IP_Cep78	1	exp_1	381.581	3	381.58	1141.72	NaN	NaN	NaN	-0.0030495	-1.1636e-06	NaN	NaN	NaN	NaN	NaN	30.842	0.33941	30.842	30.657	30.996	-3.5527e-15								0	0	0	0.025981
RHRGFPLIK	9	1	2	Unmodified	_RHRGFPLIK_			0	0	2	sp|Q5JTW2-5|CEP78_HUMAN;sp|Q5JTW2-2|CEP78_HUMAN;sp|Q5JTW2|CEP78_HUMAN;sp|Q5JTW2-3|CEP78_HUMAN	sp|Q5JTW2-5|CEP78_HUMAN	sp|Q5JTW2-5|CEP78_HUMAN	ISO-MSMS	0	16062020_SKO_IP_Cep78	1	exp_1	375.233	3	375.233	1122.68	NaN	NaN	NaN	0.078144	2.9322e-05	NaN	NaN	NaN	NaN	NaN	13.805	1.2926	13.805	13.221	14.513	1.7764e-15								0	0	0	0.025137
RRTIILGSGHK	11	1	2	Unmodified	_RRTIILGSGHK_			0	0	2	sp|Q5JTW2-5|CEP78_HUMAN;sp|Q5JTW2-2|CEP78_HUMAN;sp|Q5JTW2|CEP78_HUMAN;sp|Q5JTW2-3|CEP78_HUMAN	sp|Q5JTW2-5|CEP78_HUMAN	sp|Q5JTW2-5|CEP78_HUMAN	ISO-MSMS	0	16062020_SKO_IP_Cep78	1	exp_1	413.255	3	413.254	1236.74	NaN	NaN	NaN	0.31758	0.00013124	NaN	NaN	NaN	NaN	NaN	6.0752	0.11732	6.0752	6.0333	6.1506	0								0	0	0	0.0040259
RVSELEHENAQLR	13	0	2	Unmodified	_RVSELEHENAQLR_			0	0	1	sp|Q5JTW2-5|CEP78_HUMAN;sp|Q5JTW2-2|CEP78_HUMAN;sp|Q5JTW2|CEP78_HUMAN;sp|Q5JTW2-3|CEP78_HUMAN	sp|Q5JTW2-5|CEP78_HUMAN	sp|Q5JTW2-5|CEP78_HUMAN	ISO-MSMS	0	16062020_SKO_IP_Cep78	1	exp_1	527.61	3	527.609	1579.81	NaN	NaN	NaN	-0.89425	-0.00047181	NaN	NaN	NaN	NaN	NaN	13.851	0.70542	13.851	13.556	14.262	0								0	0	0	0.0016114
SRVPAIRYK	9	1	2	Unmodified	_SRVPAIRYK_			0	0	2	sp|Q5JTW2-5|CEP78_HUMAN;sp|Q5JTW2-2|CEP78_HUMAN;sp|Q5JTW2|CEP78_HUMAN;sp|Q5JTW2-3|CEP78_HUMAN	sp|Q5JTW2-5|CEP78_HUMAN	sp|Q5JTW2-5|CEP78_HUMAN	ISO-MSMS	0	16062020_SKO_IP_Cep78	1	exp_1	363.889	3	363.889	1088.65	NaN	NaN	NaN	-0.27021	-9.8325e-05	NaN	NaN	NaN	NaN	NaN	12.433	1.4308	12.433	11.486	12.917	0								0	0	0	9.7753e-18
VSELEHENAQLR	12	0	1	Unmodified	_VSELEHENAQLR_			0	0	0	sp|Q5JTW2-5|CEP78_HUMAN;sp|Q5JTW2-2|CEP78_HUMAN;sp|Q5JTW2|CEP78_HUMAN;sp|Q5JTW2-3|CEP78_HUMAN	sp|Q5JTW2-5|CEP78_HUMAN	sp|Q5JTW2-5|CEP78_HUMAN	ISO-MSMS	0	16062020_SKO_IP_Cep78	1	exp_1	475.577	3	475.576	1423.71	NaN	NaN	NaN	-0.14418	-6.8569e-05	NaN	NaN	NaN	NaN	NaN	15.878	0.20193	15.878	15.776	15.978	0								0	0	0	0.005219
VSELEHENAQLR	12	0	1	Unmodified	_VSELEHENAQLR_			0	0	0	sp|Q5JTW2-5|CEP78_HUMAN;sp|Q5JTW2-2|CEP78_HUMAN;sp|Q5JTW2|CEP78_HUMAN;sp|Q5JTW2-3|CEP78_HUMAN	sp|Q5JTW2-5|CEP78_HUMAN	sp|Q5JTW2-5|CEP78_HUMAN	ISO-MSMS	2	16062020_SKO_IP_Cep78	1	exp_1	478.913	3	475.576	1423.71	NaN	NaN	NaN	-0.88359	-0.00042021	NaN	NaN	NaN	NaN	NaN	15.874	0.2859	15.874	15.776	16.062	1.7764e-15								0	0	0	2.8518e-05
AASIFGGAK	9	1	0	Unmodified	_AASIFGGAK_			0	0	0	sp|P23588|IF4B_HUMAN;sp|P23588-2|IF4B_HUMAN	sp|P23588|IF4B_HUMAN	sp|P23588|IF4B_HUMAN	MULTI-MSMS		16062020_SKO_IP_Cep78	1	exp_1	829.868	1	821.452	820.444	30359.3	-0.30605	-0.0002514	0.25128	0.00020642	-0.054763	-4.4986e-05	821.452	825.477	829.466	19.285	1.9545	19.285	18.706	20.661	3.5527e-15					377	115	12	0	0	0	8.5145e-51
AFGSGYR	7	0	1	Unmodified	_AFGSGYR_			0	0	0	sp|P23588|IF4B_HUMAN;sp|P23588-2|IF4B_HUMAN	sp|P23588|IF4B_HUMAN	sp|P23588|IF4B_HUMAN	MULTI-SECPEP		16062020_SKO_IP_Cep78	1	exp_1	757.324	1	757.363	756.355	32343.8	0.79144	0.00059941	0.49475	0.0003747	1.2862	0.00097411	757.363	763.383	767.372	12.157	0.30347	12.157	11.957	12.26	0					104	17	9	0	0	0	0.019969
DEVEAVK	7	1	0	Unmodified	_DEVEAVK_			0	0	0	sp|Q9Y2T3-2|GUAD_HUMAN;sp|Q9Y2T3|GUAD_HUMAN;sp|Q9Y2T3-3|GUAD_HUMAN	sp|Q9Y2T3-2|GUAD_HUMAN	sp|Q9Y2T3-2|GUAD_HUMAN	MULTI-MSMS		16062020_SKO_IP_Cep78	1	exp_1	793.424	1	789.399	788.392	31858	0.94651	0.00074717	-0.67905	-0.00053604	0.26746	0.00021113	789.399	793.424	797.411	12.631	0.35412	12.631	12.445	12.8	0					100	20	7	0	0	0	0.00021347
DNNLLGR	7	0	1	Unmodified	_DNNLLGR_			0	0	0	sp|P0DMV9|HS71B_HUMAN;sp|P0DMV8|HS71A_HUMAN;sp|P0DMV8-2|HS71A_HUMAN;sp|P34931|HS71L_HUMAN;sp|P17066|HSP76_HUMAN	sp|P0DMV9|HS71B_HUMAN;sp|P17066|HSP76_HUMAN	sp|P0DMV9|HS71B_HUMAN	MULTI-MSMS		16062020_SKO_IP_Cep78	1	exp_1	801.422	1	801.421	800.414	30778.6	1.2014	0.00096283	1.2152	0.00097391	2.4166	0.0019367	801.421	807.441	811.429	18.388	0.62369	18.388	18.167	18.79	0					220	36	10	0	0	0	8.3998e-24
DSLYAQGK	8	1	0	Unmodified	_DSLYAQGK_			0	0	0	sp|P83881|RL36A_HUMAN	sp|P83881|RL36A_HUMAN	sp|P83881|RL36A_HUMAN	ISO-MSMS	2	16062020_SKO_IP_Cep78	1	exp_1	889.44	1	881.436	880.429	NaN	NaN	NaN	-1.9348	-0.0017054	NaN	NaN	NaN	NaN	NaN	10.615	0.30375	10.615	10.442	10.745	1.7764e-15								0	0	0	0.011692
GFPVLSK	7	1	0	Unmodified	_GFPVLSK_			0	0	0	sp|O14744-5|ANM5_HUMAN;sp|O14744|ANM5_HUMAN;sp|O14744-3|ANM5_HUMAN;sp|O14744-2|ANM5_HUMAN	sp|O14744-5|ANM5_HUMAN	sp|O14744-5|ANM5_HUMAN	MULTI-SECPEP		16062020_SKO_IP_Cep78	1	exp_1	747.834	1	747.44	746.433	33430.3	0.7503	0.0005608	-0.25012	-0.00018695	0.50018	0.00037386	747.439	751.467	755.453	30.36	0.50656	30.36	30.099	30.606	0					145	29	7	0	0	0	0.0083355
LTSSLTTK	8	1	0	Unmodified	_LTSSLTTK_			0	0	0	sp|P22695|QCR2_HUMAN	sp|P22695|QCR2_HUMAN	sp|P22695|QCR2_HUMAN	ISO-MSMS	0	16062020_SKO_IP_Cep78	1	exp_1	851.442	1	850.488	849.481	NaN	NaN	NaN	-1.0997	-0.00093527	NaN	NaN	NaN	NaN	NaN	15.032	1.2646	15.032	14.915	16.18	-3.5527e-15								0	0	0	0.0084383
SGVSLAALK	9	1	0	Unmodified	_SGVSLAALK_			0	0	0	sp|P16403|H12_HUMAN;sp|P10412|H14_HUMAN;sp|P16402|H13_HUMAN	sp|P16403|H12_HUMAN	sp|P16403|H12_HUMAN	ISO-MSMS	0	16062020_SKO_IP_Cep78	1	exp_1	845.868	1	845.509	844.502	NaN	NaN	NaN	0.49136	0.00041545	NaN	NaN	NaN	NaN	NaN	29.237	0.18485	29.237	29.151	29.336	3.5527e-15								0	0	0	0.012131
TISQLFAK	8	1	0	Unmodified	_TISQLFAK_			0	0	0	sp|Q4VCS5-2|AMOT_HUMAN;sp|Q4VCS5|AMOT_HUMAN	sp|Q4VCS5-2|AMOT_HUMAN	sp|Q4VCS5-2|AMOT_HUMAN	ISO-MSMS	0	16062020_SKO_IP_Cep78	1	exp_1	907.422	1	907.525	906.517	NaN	NaN	NaN	-1.4727	-0.0013366	NaN	NaN	NaN	NaN	NaN	34.571	0.47258	34.571	34.332	34.805	0								0	0	0	0.00043436
TVGVEPAADGK	11	1	0	Unmodified	_TVGVEPAADGK_			0	0	0	sp|P46779|RL28_HUMAN;sp|P46779-2|RL28_HUMAN;sp|P46779-3|RL28_HUMAN;sp|P46779-4|RL28_HUMAN;sp|P46779-5|RL28_HUMAN	sp|P46779|RL28_HUMAN	sp|P46779|RL28_HUMAN	ISO-MSMS	0	16062020_SKO_IP_Cep78	1	exp_1	1043.54	1	1043.54	1042.53	NaN	NaN	NaN	-1.5555	-0.0016233	NaN	NaN	NaN	NaN	NaN	12.326	0.23556	12.326	12.21	12.445	0								0	0	0	3.7358e-29
AAAAAAALQAK	11	1	0	Unmodified	_AAAAAAALQAK_			0	0	0	sp|P36578|RL4_HUMAN	sp|P36578|RL4_HUMAN	sp|P36578|RL4_HUMAN	MULTI-MSMS		16062020_SKO_IP_Cep78	1	exp_1	478.781	2	478.78	955.545	39945.6	1.6352	0.00078288	-0.91876	-0.00043988	0.71641	0.000343	478.78	480.792	482.787	13.177	0.38683	13.177	12.985	13.372	0					161	22	11	0	0	0	2.3472e-97
AAATAEEPDPK	11	1	0	Unmodified	_AAATAEEPDPK_			0	0	0	sp|Q99733|NP1L4_HUMAN;sp|Q99733-2|NP1L4_HUMAN	sp|Q99733|NP1L4_HUMAN	sp|Q99733|NP1L4_HUMAN	ISO-MSMS	0	16062020_SKO_IP_Cep78	1	exp_1	550.267	2	550.267	1098.52	NaN	NaN	NaN	-0.15702	-8.6406e-05	NaN	NaN	NaN	NaN	NaN	7.1035	0.1718	7.1035	7.0038	7.1756	0								0	0	0	0.0043592
AADPPAENSSAPEAEQGGAE	20	0	0	Unmodified	_AADPPAENSSAPEAEQGGAE_			0	0	0	sp|P67809|YBOX1_HUMAN	sp|P67809|YBOX1_HUMAN	sp|P67809|YBOX1_HUMAN	ISO-MSMS	-1	16062020_SKO_IP_Cep78	1	exp_1	949.909	2	949.406	1896.8	NaN	NaN	NaN	0.035758	3.3949e-05	NaN	NaN	NaN	NaN	NaN	17.212	0.20221	17.212	17.123	17.325	0								0	0	0	3.4024e-144
AAGPISER	8	0	1	Acetyl (Protein N-term)	_(ac)AAGPISER_			1	0	0	sp|Q15427|SF3B4_HUMAN	sp|Q15427|SF3B4_HUMAN	sp|Q15427|SF3B4_HUMAN	ISO-MSMS	0	16062020_SKO_IP_Cep78	1	exp_1	421.722	2	421.722	841.429	NaN	NaN	NaN	0.17565	7.4074e-05	NaN	NaN	NaN	NaN	NaN	19.663	0.33753	19.663	19.514	19.852	0								0	0	0	0.0019294
AAGVEAAAEVAATEIK	16	1	0	Acetyl (Protein N-term)	_(ac)AAGVEAAAEVAATEIK_			1	0	0	sp|P52272-2|HNRPM_HUMAN;sp|P52272|HNRPM_HUMAN	sp|P52272-2|HNRPM_HUMAN	sp|P52272-2|HNRPM_HUMAN	ISO-MSMS	1	16062020_SKO_IP_Cep78	1	exp_1	773.917	2	771.904	1541.79	NaN	NaN	NaN	-0.99917	-0.00077126	NaN	NaN	NaN	NaN	NaN	82.953	0.46947	82.953	82.7	83.169	-1.4211e-14								0	0	0	0.016682
AALRPLVK	8	1	1	Unmodified	_AALRPLVK_			0	0	1	sp|P62910|RL32_HUMAN	sp|P62910|RL32_HUMAN	sp|P62910|RL32_HUMAN	MULTI-MSMS		16062020_SKO_IP_Cep78	1	exp_1	443.304	2	434.292	866.57	41810.8	0.91297	0.0003965	0.28479	0.00012368	1.1978	0.00052018	434.293	439.315	443.304	14.055	0.48673	14.055	13.742	14.228	0					166	28	9	0	0	0	0.0029531
AALRQITDK	9	1	1	Unmodified	_AALRQITDK_			0	0	1	sp|O75533|SF3B1_HUMAN	sp|O75533|SF3B1_HUMAN	sp|O75533|SF3B1_HUMAN	ISO-MSMS	0	16062020_SKO_IP_Cep78	1	exp_1	508.298	2	508.298	1014.58	NaN	NaN	NaN	-0.54176	-0.00027538	NaN	NaN	NaN	NaN	NaN	9.8109	0.20237	9.8109	9.684	9.8863	0								0	0	0	9.3707e-07
AALRQITDK	9	1	1	Unmodified	_AALRQITDK_			0	0	1	sp|O75533|SF3B1_HUMAN	sp|O75533|SF3B1_HUMAN	sp|O75533|SF3B1_HUMAN	ISO-MSMS	2	16062020_SKO_IP_Cep78	1	exp_1	517.309	2	508.298	1014.58	NaN	NaN	NaN	-0.35391	-0.00017989	NaN	NaN	NaN	NaN	NaN	9.8017	0.20237	9.8017	9.684	9.8863	0								0	0	0	0.022807
AAMAVGGAGGSR	12	0	1	Acetyl (Protein N-term),Oxidation (M)	_(ac)AAM(ox)AVGGAGGSR_	AAM(1)AVGGAGGSR	AAM(98.73)AVGGAGGSR	1	1	0	sp|O14744-5|ANM5_HUMAN;sp|O14744|ANM5_HUMAN	sp|O14744-5|ANM5_HUMAN	sp|O14744-5|ANM5_HUMAN	ISO-MSMS	0	16062020_SKO_IP_Cep78	1	exp_1	531.756	2	531.753	1061.49	NaN	NaN	NaN	0.63433	0.00033731	NaN	NaN	NaN	NaN	NaN	15.817	0.48873	15.817	15.489	15.978	1.7764e-15								0	0	0	0.00024877
AAMAVGGAGGSR	12	0	1	Acetyl (Protein N-term),Oxidation (M)	_(ac)AAM(ox)AVGGAGGSR_	AAM(1)AVGGAGGSR	AAM(60.9)AVGGAGGSR	1	1	0	sp|O14744-5|ANM5_HUMAN;sp|O14744|ANM5_HUMAN	sp|O14744-5|ANM5_HUMAN	sp|O14744-5|ANM5_HUMAN	MSMS	2	16062020_SKO_IP_Cep78	1	exp_1	536.76	2	531.753	1061.49	NaN	NaN	NaN	NaN	NaN	NaN	NaN	NaN	NaN	NaN	15.619	1	15.619	15.119	16.119	0								0	0	0	0.012733
AAQDRDQIYR	10	0	2	Unmodified	_AAQDRDQIYR_			0	0	1	sp|P62995-3|TRA2B_HUMAN;sp|P62995|TRA2B_HUMAN	sp|P62995-3|TRA2B_HUMAN	sp|P62995-3|TRA2B_HUMAN	MSMS	0	16062020_SKO_IP_Cep78	1	exp_1	618.307	2	618.31	1234.61	NaN	NaN	NaN	NaN	NaN	NaN	NaN	NaN	NaN	NaN	8.1483	1	8.1483	7.6483	8.6483	0								0	0	0	5.0057e-103
AAQLAIR	7	0	1	Unmodified	_AAQLAIR_			0	0	0	sp|P62910|RL32_HUMAN	sp|P62910|RL32_HUMAN	sp|P62910|RL32_HUMAN	ISO-MSMS	0	16062020_SKO_IP_Cep78	1	exp_1	372.234	2	371.732	741.45	NaN	NaN	NaN	0.3409	0.00012672	NaN	NaN	NaN	NaN	NaN	14.957	0.31687	14.957	14.797	15.114	0								0	0	0	0.025369
AAREPNIDR	9	0	2	Unmodified	_AAREPNIDR_			0	0	1	sp|P23588|IF4B_HUMAN;sp|P23588-2|IF4B_HUMAN	sp|P23588|IF4B_HUMAN	sp|P23588|IF4B_HUMAN	MULTI-MSMS		16062020_SKO_IP_Cep78	1	exp_1	521.275	2	521.275	1040.54	37860.4	0.56473	0.00029438	-0.19262	-0.00010041	0.37212	0.00019398	521.275	527.297	531.284	6.4104	0.61864	6.4104	6.3349	6.9535	0					150	36	9	0	0	0	1.5705e-251
AASIFGGAK	9	1	0	Unmodified	_AASIFGGAK_			0	0	0	sp|P23588|IF4B_HUMAN;sp|P23588-2|IF4B_HUMAN	sp|P23588|IF4B_HUMAN	sp|P23588|IF4B_HUMAN	MULTI-MSMS		16062020_SKO_IP_Cep78	1	exp_1	411.23	2	411.229	820.444	43203.3	0.87537	0.00035998	-0.3886	-0.00015981	0.48676	0.00020017	411.229	413.242	415.236	19.277	0.70788	19.277	19.043	19.751	0					290	41	10	0	0	0	8.8426e-06
AASIFGGAKPVDTAAR	16	1	1	Unmodified	_AASIFGGAKPVDTAAR_			0	0	1	sp|P23588|IF4B_HUMAN;sp|P23588-2|IF4B_HUMAN	sp|P23588|IF4B_HUMAN	sp|P23588|IF4B_HUMAN	MULTI-MSMS		16062020_SKO_IP_Cep78	1	exp_1	771.438	2	766.415	1530.82	32408.2	1.6366	0.0012543	-0.32092	-0.00024596	1.3157	0.0010084	766.415	771.437	775.426	27.036	0.32073	27.036	26.871	27.191	0					144	18	14	0	0	0	0.0010085
ADGYVLEGK	9	1	0	Unmodified	_ADGYVLEGK_			0	0	0	sp|P62241|RS8_HUMAN	sp|P62241|RS8_HUMAN	sp|P62241|RS8_HUMAN	MULTI-MSMS		16062020_SKO_IP_Cep78	1	exp_1	480.251	2	476.243	950.471	39843.3	1.9196	0.00091421	-0.39846	-0.00018977	1.5212	0.00072444	476.243	478.256	480.25	18.419	0.50529	18.419	18.235	18.74	0					224	29	10	0	0	0	0.0015642
ADHSFSDGVPSDSVEAAK	18	1	0	Acetyl (Protein N-term)	_(ac)ADHSFSDGVPSDSVEAAK_			1	0	0	sp|Q99733|NP1L4_HUMAN;sp|Q99733-2|NP1L4_HUMAN	sp|Q99733|NP1L4_HUMAN	sp|Q99733|NP1L4_HUMAN	ISO-MSMS	0	16062020_SKO_IP_Cep78	1	exp_1	930.918	2	930.916	1859.82	NaN	NaN	NaN	-2.0934	-0.0019488	NaN	NaN	NaN	NaN	NaN	34.549	0.2867	34.549	34.384	34.67	0								0	0	0	5.5854e-108
ADIQTER	7	0	1	Acetyl (Protein N-term)	_(ac)ADIQTER_			1	0	0	sp|P62280|RS11_HUMAN	sp|P62280|RS11_HUMAN	sp|P62280|RS11_HUMAN	ISO-MSMS	2	16062020_SKO_IP_Cep78	1	exp_1	442.722	2	437.717	873.419	NaN	NaN	NaN	-1.0752	-0.00047064	NaN	NaN	NaN	NaN	NaN	17.086	0.28631	17.086	16.971	17.258	0								0	0	0	0.0045576
ADTQTYQPYNK	11	1	0	Unmodified	_ADTQTYQPYNK_			0	0	0	sp|P84090|ERH_HUMAN	sp|P84090|ERH_HUMAN	sp|P84090|ERH_HUMAN	MULTI-MSMS		16062020_SKO_IP_Cep78	1	exp_1	668.817	2	664.809	1327.6	33835.7	1.911	0.0012704	-0.0016458	-1.0942e-06	1.9093	0.0012693	664.81	666.822	668.817	14.274	0.28535	14.274	14.094	14.379	0					134	16	11	0	0	0	1.6156e-180
ADYEIASK	8	1	0	Unmodified	_ADYEIASK_			0	0	0	sp|Q9Y383-3|LC7L2_HUMAN;sp|Q9Y383-2|LC7L2_HUMAN;sp|Q9Y383|LC7L2_HUMAN;sp|Q96HJ9-2|FMC1_HUMAN;sp|Q9NQ29-2|LUC7L_HUMAN;sp|Q9NQ29-3|LUC7L_HUMAN;sp|Q9NQ29|LUC7L_HUMAN	sp|Q9Y383-3|LC7L2_HUMAN	sp|Q9Y383-3|LC7L2_HUMAN	ISO-MSMS	0	16062020_SKO_IP_Cep78	1	exp_1	448.721	2	448.722	895.429	NaN	NaN	NaN	1.046	0.00046935	NaN	NaN	NaN	NaN	NaN	14.27	0.21828	14.27	14.111	14.329	0								0	0	0	0.0097331
AEADAYIR	8	0	1	Unmodified	_AEADAYIR_			0	0	0	sp|P46821|MAP1B_HUMAN	sp|P46821|MAP1B_HUMAN	sp|P46821|MAP1B_HUMAN	ISO-MSMS	0	16062020_SKO_IP_Cep78	1	exp_1	454.728	2	454.727	907.44	NaN	NaN	NaN	1.1497	0.00052278	NaN	NaN	NaN	NaN	NaN	16.582	0.40407	16.582	16.449	16.853	3.5527e-15								0	0	0	0.0010178
AEAESLYQSK	10	1	0	Unmodified	_AEAESLYQSK_			0	0	0	sp|P04264|K2C1_HUMAN;CON__P04264	sp|P04264|K2C1_HUMAN	sp|P04264|K2C1_HUMAN	ISO-MSMS	0	16062020_SKO_IP_Cep78	1	exp_1	563.275	2	563.275	1124.53	NaN	NaN	NaN	-0.019187	-1.0808e-05	NaN	NaN	NaN	NaN	NaN	14.888	0.26919	14.888	14.73	14.999	0								0	0	0	1.5758e-12
AEDEVQRER	9	0	2	Unmodified	_AEDEVQRER_			0	0	1	sp|P0DMV9|HS71B_HUMAN;sp|P0DMV8|HS71A_HUMAN;sp|P0DMV8-2|HS71A_HUMAN	sp|P0DMV9|HS71B_HUMAN	sp|P0DMV9|HS71B_HUMAN	MSMS	1	16062020_SKO_IP_Cep78	1	exp_1	572.294	2	566.273	1130.53	NaN	NaN	NaN	NaN	NaN	NaN	NaN	NaN	NaN	NaN	3.1469	1	3.1469	2.6469	3.6469	0								0	0	0	3.2586e-32
AEEILEK	7	1	0	Unmodified	_AEEILEK_			0	0	0	sp|P62913-2|RL11_HUMAN;sp|P62913|RL11_HUMAN	sp|P62913-2|RL11_HUMAN	sp|P62913-2|RL11_HUMAN	MULTI-MSMS		16062020_SKO_IP_Cep78	1	exp_1	418.239	2	416.227	830.439	43000.4	0.84835	0.00035311	1.4451	0.0006015	2.2935	0.0009546	416.227	418.239	420.235	13.971	0.58791	13.971	13.624	14.211	0					152	34	10	0	0	0	0.013139
AEFAEVSK	8	1	0	Unmodified	_AEFAEVSK_			0	0	0	sp|P02768|ALBU_HUMAN;CON__P02768-1;sp|P02768-2|ALBU_HUMAN	sp|P02768|ALBU_HUMAN	sp|P02768|ALBU_HUMAN	ISO-MSMS	0	16062020_SKO_IP_Cep78	1	exp_1	440.724	2	440.724	879.434	NaN	NaN	NaN	8.6344	0.0038054	NaN	NaN	NaN	NaN	NaN	14.957	0.26957	14.957	14.747	15.017	0								0	0	0	0.012392
AEFVEVTK	8	1	0	Unmodified	_AEFVEVTK_			0	0	0	CON__P02769	CON__P02769	CON__P02769	ISO-MSMS	0	16062020_SKO_IP_Cep78	1	exp_1	461.749	2	461.748	921.481	NaN	NaN	NaN	0.80062	0.00036969	NaN	NaN	NaN	NaN	NaN	20.409	0.52319	20.409	20.087	20.611	-3.5527e-15								0	0	0	0.021564
AFGSGYR	7	0	1	Unmodified	_AFGSGYR_			0	0	0	sp|P23588|IF4B_HUMAN;sp|P23588-2|IF4B_HUMAN	sp|P23588|IF4B_HUMAN	sp|P23588|IF4B_HUMAN	ISO-MSMS	0	16062020_SKO_IP_Cep78	1	exp_1	379.186	2	379.185	756.355	NaN	NaN	NaN	0.5302	0.00020104	NaN	NaN	NaN	NaN	NaN	12.152	0.37133	12.152	11.923	12.294	0								0	0	0	0.0098959
AFGSGYR	7	0	1	Unmodified	_AFGSGYR_			0	0	0	sp|P23588|IF4B_HUMAN;sp|P23588-2|IF4B_HUMAN	sp|P23588|IF4B_HUMAN	sp|P23588|IF4B_HUMAN	ISO-MSMS	1	16062020_SKO_IP_Cep78	1	exp_1	382.195	2	379.185	756.355	NaN	NaN	NaN	0.94563	0.00035857	NaN	NaN	NaN	NaN	NaN	12.149	0.32061	12.149	11.957	12.277	1.7764e-15								0	0	0	0.0098959
AFGSGYRR	8	0	2	Unmodified	_AFGSGYRR_			0	0	1	sp|P23588|IF4B_HUMAN;sp|P23588-2|IF4B_HUMAN	sp|P23588|IF4B_HUMAN	sp|P23588|IF4B_HUMAN	MULTI-MSMS		16062020_SKO_IP_Cep78	1	exp_1	457.236	2	457.236	912.457	40718.2	0.32634	0.00014921	0.36581	0.00016726	0.69215	0.00031648	457.236	463.256	467.244	6.9116	0.16764	6.9116	6.7859	6.9535	0					44	9	11	0	0	0	1.2421e-24
AFGSYRGR	8	0	2	Unmodified	_AFGSYRGR_			0	0	1	sp|Q86UW8|HPLN4_HUMAN	sp|Q86UW8|HPLN4_HUMAN	sp|Q86UW8|HPLN4_HUMAN	MULTI-MSMS		16062020_SKO_IP_Cep78	1	exp_1	463.257	2	457.236	912.457	40718.2	0.32634	0.00014921	0.36581	0.00016726	0.69215	0.00031648	457.236	463.256	467.244	6.9116	0.16764	6.9116	6.7859	6.9535	0					44	9	11	0	0	0	3.3975e-10
AFMGPLK	7	1	0	Oxidation (M)	_AFM(ox)GPLK_	AFM(1)GPLK	AFM(53.71)GPLK	0	1	0	sp|P39023|RL3_HUMAN	sp|P39023|RL3_HUMAN	sp|P39023|RL3_HUMAN	MULTI-MSMS		16062020_SKO_IP_Cep78	1	exp_1	394.217	2	390.21	778.405	43852.1	1.6305	0.00063623	-0.56552	-0.00022067	1.065	0.00041556	390.21	392.223	394.217	18.336	0.47215	18.336	18.083	18.555	0					152	27	9	0	0	0	0.015814
AGGDATDSSQTALDNK	16	1	0	Unmodified	_AGGDATDSSQTALDNK_			0	0	0	sp|O75122|CLAP2_HUMAN;sp|O75122-3|CLAP2_HUMAN	sp|O75122|CLAP2_HUMAN	sp|O75122|CLAP2_HUMAN	MSMS	2	16062020_SKO_IP_Cep78	1	exp_1	779.858	2	775.85	1549.69	NaN	NaN	NaN	NaN	NaN	NaN	NaN	NaN	NaN	NaN	12.686	1	12.686	12.186	13.186	0								0	0	0	1.1157e-21
AGVNTVTTLVENK	13	1	0	Unmodified	_AGVNTVTTLVENK_			0	0	0	sp|P62424|RL7A_HUMAN	sp|P62424|RL7A_HUMAN	sp|P62424|RL7A_HUMAN	ISO-MSMS	0	16062020_SKO_IP_Cep78	1	exp_1	673.377	2	673.37	1344.72	NaN	NaN	NaN	4.4973	0.0030284	NaN	NaN	NaN	NaN	NaN	36.481	0.18719	36.481	36.367	36.555	0								0	0	0	0.0026288
AHLGTALK	8	1	0	Unmodified	_AHLGTALK_			0	0	0	sp|P62266|RS23_HUMAN	sp|P62266|RS23_HUMAN	sp|P62266|RS23_HUMAN	MULTI-MSMS		16062020_SKO_IP_Cep78	1	exp_1	405.746	2	405.745	809.476	43858.1	0.60656	0.00024611	-0.05772	-2.342e-05	0.54884	0.00022269	405.745	407.758	409.752	6.8614	0.28309	6.8614	6.6537	6.9368	0					65	16	11	0	0	0	5.6541e-104
AHLTNQYMQR	10	0	1	Oxidation (M)	_AHLTNQYM(ox)QR_	AHLTNQYM(1)QR	AHLTNQYM(76.22)QR	0	1	0	sp|Q13310-2|PABP4_HUMAN;sp|Q13310|PABP4_HUMAN;sp|Q13310-3|PABP4_HUMAN	sp|Q13310-2|PABP4_HUMAN	sp|Q13310-2|PABP4_HUMAN	ISO-MSMS	2	16062020_SKO_IP_Cep78	1	exp_1	644.31	2	639.306	1276.6	NaN	NaN	NaN	0.55574	0.00035529	NaN	NaN	NaN	NaN	NaN	6.7967	0.14881	6.7967	6.6874	6.8362	0								0	0	0	0.016165
AHSIQIMK	8	1	0	Oxidation (M)	_AHSIQIM(ox)K_	AHSIQIM(1)K	AHSIQIM(160.54)K	0	1	0	sp|Q02543|RL18A_HUMAN	sp|Q02543|RL18A_HUMAN	sp|Q02543|RL18A_HUMAN	MULTI-MSMS		16062020_SKO_IP_Cep78	1	exp_1	476.262	2	472.255	942.496	40845.2	0.28119	0.00013279	-0.26438	-0.00012485	0.016813	7.9398e-06	472.255	474.268	476.262	6.7599	0.24961	6.7599	6.6369	6.8865	0					81	14	10	0	0	0	1.5471e-72
ALAAAGYDVEK	11	1	0	Unmodified	_ALAAAGYDVEK_			0	0	0	sp|P16403|H12_HUMAN;sp|P10412|H14_HUMAN;sp|P16402|H13_HUMAN;sp|P22492|H1T_HUMAN;sp|Q02539|H11_HUMAN	sp|P16403|H12_HUMAN	sp|P16403|H12_HUMAN	ISO-MSMS	0	16062020_SKO_IP_Cep78	1	exp_1	553.789	2	554.288	1106.56	NaN	NaN	NaN	0.51802	0.00028713	NaN	NaN	NaN	NaN	NaN	21.562	0.37562	21.562	21.377	21.753	0								0	0	0	0.0057708
ALAAAGYDVEK	11	1	0	Unmodified	_ALAAAGYDVEK_			0	0	0	sp|P16403|H12_HUMAN;sp|P10412|H14_HUMAN;sp|P16402|H13_HUMAN;sp|P22492|H1T_HUMAN;sp|Q02539|H11_HUMAN	sp|P16403|H12_HUMAN	sp|P16403|H12_HUMAN	ISO-MSMS	2	16062020_SKO_IP_Cep78	1	exp_1	558.293	2	554.288	1106.56	NaN	NaN	NaN	-1.4516	-0.00080463	NaN	NaN	NaN	NaN	NaN	21.53	0.32961	21.53	21.4	21.73	0								0	0	0	0.0046976
ALADEREAVQK	11	1	1	Unmodified	_ALADEREAVQK_			0	0	1	sp|Q01082|SPTB2_HUMAN;sp|Q01082-2|SPTB2_HUMAN;sp|Q9H254-2|SPTN4_HUMAN;sp|Q9H254-4|SPTN4_HUMAN;sp|O15020-2|SPTN2_HUMAN;sp|O15020|SPTN2_HUMAN;sp|Q9H254|SPTN4_HUMAN	sp|Q01082|SPTB2_HUMAN	sp|Q01082|SPTB2_HUMAN	ISO-MSMS	0	16062020_SKO_IP_Cep78	1	exp_1	615.328	2	615.328	1228.64	NaN	NaN	NaN	1.4604	0.00089863	NaN	NaN	NaN	NaN	NaN	12.117	0.13456	12.117	12.024	12.159	0								0	0	0	0.0012582
ALEESNYELEGK	12	1	0	Unmodified	_ALEESNYELEGK_			0	0	0	sp|P13645|K1C10_HUMAN;CON__P13645;CON__P02535-1	sp|P13645|K1C10_HUMAN	sp|P13645|K1C10_HUMAN	ISO-MSMS	0	16062020_SKO_IP_Cep78	1	exp_1	691.33	2	691.328	1380.64	NaN	NaN	NaN	-1.5335	-0.0010601	NaN	NaN	NaN	NaN	NaN	24.432	0.32214	24.432	24.263	24.585	0								0	0	0	5.2586e-06
ALGDYDYK	8	1	0	Unmodified	_ALGDYDYK_			0	0	0	sp|O75688|PPM1B_HUMAN;sp|O75688-4|PPM1B_HUMAN;sp|O75688-2|PPM1B_HUMAN;sp|O75688-5|PPM1B_HUMAN	sp|O75688|PPM1B_HUMAN	sp|O75688|PPM1B_HUMAN	MULTI-MSMS		16062020_SKO_IP_Cep78	1	exp_1	472.723	2	472.722	943.429	40564.5	0.85829	0.00040573	-0.081263	-3.8415e-05	0.77703	0.00036732	472.722	474.734	476.729	20.092	0.72423	20.092	19.768	20.492	0					283	42	12	0	0	0	0.023738
ALSAVSAQAAAAQK	14	1	0	Unmodified	_ALSAVSAQAAAAQK_			0	0	0	sp|O00268|TAF4_HUMAN	sp|O00268|TAF4_HUMAN	sp|O00268|TAF4_HUMAN	ISO-MSMS	0	16062020_SKO_IP_Cep78	1	exp_1	643.858	2	643.857	1285.7	NaN	NaN	NaN	0.27455	0.00017677	NaN	NaN	NaN	NaN	NaN	18.352	0.16884	18.352	18.285	18.454	-3.5527e-15								0	0	0	0.0010941
ALSAVSAQAAAAQK	14	1	0	Unmodified	_ALSAVSAQAAAAQK_			0	0	0	sp|O00268|TAF4_HUMAN	sp|O00268|TAF4_HUMAN	sp|O00268|TAF4_HUMAN	ISO-MSMS	2	16062020_SKO_IP_Cep78	1	exp_1	648.365	2	643.857	1285.7	NaN	NaN	NaN	-1.0976	-0.00070673	NaN	NaN	NaN	NaN	NaN	18.357	0.21927	18.357	18.252	18.471	0								0	0	0	0.00060392
ALVATPGKK	9	2	0	Unmodified	_ALVATPGKK_			0	0	1	sp|P19338|NUCL_HUMAN	sp|P19338|NUCL_HUMAN	sp|P19338|NUCL_HUMAN	MULTI-MSMS		16062020_SKO_IP_Cep78	1	exp_1	442.783	2	442.782	883.549	42260.2	0.23762	0.00010521	0.95912	0.00042468	1.1967	0.00052989	442.783	446.807	450.797	6.8583	0.34488	6.8583	6.6874	7.0323	8.8818e-16					66	21	8	0	0	0	7.3087e-09
ANITAIRR	8	0	2	Unmodified	_ANITAIRR_			0	0	1	sp|P49368-2|TCPG_HUMAN;sp|P49368|TCPG_HUMAN	sp|P49368-2|TCPG_HUMAN	sp|P49368-2|TCPG_HUMAN	ISO-MSMS	0	16062020_SKO_IP_Cep78	1	exp_1	457.78	2	457.78	913.546	NaN	NaN	NaN	-1.1789	-0.00053967	NaN	NaN	NaN	NaN	NaN	9.5361	0.13426	9.5361	9.4654	9.5997	0								0	0	0	0.003498
ANPFGGASHAK	11	1	0	Unmodified	_ANPFGGASHAK_			0	0	0	sp|P62266|RS23_HUMAN	sp|P62266|RS23_HUMAN	sp|P62266|RS23_HUMAN	MULTI-MSMS		16062020_SKO_IP_Cep78	1	exp_1	532.772	2	528.765	1055.51	38234.7	0.076872	4.0647e-05	-0.88805	-0.00046957	-0.81118	-0.00042892	528.764	530.777	532.772	6.9112	0.21985	6.9112	6.8194	7.0393	0					56	14	9	0	0	0	3.2756e-09
APNTPASGANGDGSMSQTQSGSTVK	25	1	0	Oxidation (M)	_APNTPASGANGDGSM(ox)SQTQSGSTVK_	APNTPASGANGDGSM(1)SQTQSGSTVK	APNTPASGANGDGSM(546.73)SQTQSGSTVK	0	1	0	CON__P15636	CON__P15636	CON__P15636	ISO-MSMS	0	16062020_SKO_IP_Cep78	1	exp_1	1184.03	2	1183.53	2365.05	NaN	NaN	NaN	-0.73237	-0.00086678	NaN	NaN	NaN	NaN	NaN	11.573	0.87203	11.573	11.27	12.142	0								0	0	0	0
AQAAAPASVPAQAPK	15	1	0	Unmodified	_AQAAAPASVPAQAPK_			0	0	0	sp|P47914|RL29_HUMAN	sp|P47914|RL29_HUMAN	sp|P47914|RL29_HUMAN	ISO-MSMS	0	16062020_SKO_IP_Cep78	1	exp_1	689.379	2	689.378	1376.74	NaN	NaN	NaN	-0.88531	-0.00061032	NaN	NaN	NaN	NaN	NaN	17.157	0.25272	17.157	17.005	17.258	-3.5527e-15								0	0	0	5.9748e-10
AQAAAPASVPAQAPK	15	1	0	Unmodified	_AQAAAPASVPAQAPK_			0	0	0	sp|P47914|RL29_HUMAN	sp|P47914|RL29_HUMAN	sp|P47914|RL29_HUMAN	ISO-MSMS	2	16062020_SKO_IP_Cep78	1	exp_1	693.386	2	689.378	1376.74	NaN	NaN	NaN	-1.7485	-0.0012054	NaN	NaN	NaN	NaN	NaN	17.163	0.20177	17.163	17.039	17.241	0								0	0	0	1.2053e-05
AQIHDLVLVGGSTR	14	0	1	Unmodified	_AQIHDLVLVGGSTR_			0	0	0	sp|P0DMV9|HS71B_HUMAN;sp|P0DMV8|HS71A_HUMAN;sp|P0DMV8-2|HS71A_HUMAN	sp|P0DMV9|HS71B_HUMAN	sp|P0DMV9|HS71B_HUMAN	ISO-MSMS	0	16062020_SKO_IP_Cep78	1	exp_1	733.915	2	733.41	1464.8	NaN	NaN	NaN	-1.6369	-0.0012005	NaN	NaN	NaN	NaN	NaN	35.945	0.44127	35.945	35.738	36.18	0								0	0	0	4.661e-07
AQQMVEILSDENR	13	0	1	Oxidation (M)	_AQQM(ox)VEILSDENR_	AQQM(1)VEILSDENR	AQQM(180.66)VEILSDENR	0	1	0	sp|Q4VCS5-2|AMOT_HUMAN;sp|Q4VCS5|AMOT_HUMAN	sp|Q4VCS5-2|AMOT_HUMAN	sp|Q4VCS5-2|AMOT_HUMAN	ISO-MSMS	0	16062020_SKO_IP_Cep78	1	exp_1	775.315	2	774.87	1547.72	NaN	NaN	NaN	-0.31385	-0.00024319	NaN	NaN	NaN	NaN	NaN	26.845	0.54029	26.845	26.617	27.158	-3.5527e-15								0	0	0	2.6383e-36
AQQMVEILSDENR	13	0	1	Oxidation (M)	_AQQM(ox)VEILSDENR_	AQQM(1)VEILSDENR	AQQM(118.48)VEILSDENR	0	1	0	sp|Q4VCS5-2|AMOT_HUMAN;sp|Q4VCS5|AMOT_HUMAN	sp|Q4VCS5-2|AMOT_HUMAN	sp|Q4VCS5-2|AMOT_HUMAN	ISO-MSMS	1	16062020_SKO_IP_Cep78	1	exp_1	777.88	2	774.87	1547.72	NaN	NaN	NaN	0.13939	0.00010801	NaN	NaN	NaN	NaN	NaN	26.867	0.43915	26.867	26.668	27.107	0								0	0	0	3.4466e-05
AQRHSDSSLEEK	12	1	1	Unmodified	_AQRHSDSSLEEK_			0	0	1	sp|Q5VV41|ARHGG_HUMAN	sp|Q5VV41|ARHGG_HUMAN	sp|Q5VV41|ARHGG_HUMAN	MULTI-MSMS		16062020_SKO_IP_Cep78	1	exp_1	694.34	2	693.834	1385.65	33181.5	2.5092	0.0017409	0.33616	0.00023324	2.8453	0.0019742	693.834	699.359	702.845	40.22	0.40947	40.22	39.993	40.403	0					153	23	11	0	0	0	0.0011497
AQVIYTR	7	0	1	Unmodified	_AQVIYTR_			0	0	0	sp|P62851|RS25_HUMAN	sp|P62851|RS25_HUMAN	sp|P62851|RS25_HUMAN	ISO-MSMS	0	16062020_SKO_IP_Cep78	1	exp_1	425.743	2	425.743	849.471	NaN	NaN	NaN	1.3143	0.00055957	NaN	NaN	NaN	NaN	NaN	13.598	0.26882	13.598	13.422	13.691	0								0	0	0	0.0049999
AQYEDIAQK	9	1	0	Unmodified	_AQYEDIAQK_			0	0	0	sp|P04264|K2C1_HUMAN	sp|P04264|K2C1_HUMAN	sp|P04264|K2C1_HUMAN	ISO-MSMS	0	16062020_SKO_IP_Cep78	1	exp_1	533.765	2	533.264	1064.51	NaN	NaN	NaN	0.3137	0.00016728	NaN	NaN	NaN	NaN	NaN	14.819	0.35325	14.819	14.68	15.034	0								0	0	0	9.2699e-26
AQYEEIANR	9	0	1	Unmodified	_AQYEEIANR_			0	0	0	sp|P13647|K2C5_HUMAN;CON__P13647	sp|P13647|K2C5_HUMAN	sp|P13647|K2C5_HUMAN	ISO-MSMS	0	16062020_SKO_IP_Cep78	1	exp_1	547.268	2	547.267	1092.52	NaN	NaN	NaN	0.26118	0.00014293	NaN	NaN	NaN	NaN	NaN	15.973	0.20195	15.973	15.86	16.062	1.7764e-15								0	0	0	0.016537
AQYEEIAQR	9	0	1	Unmodified	_AQYEEIAQR_			0	0	0	sp|P35908|K22E_HUMAN;CON__P35908v2;CON__P35908	sp|P35908|K22E_HUMAN	sp|P35908|K22E_HUMAN	ISO-MSMS	0	16062020_SKO_IP_Cep78	1	exp_1	554.275	2	554.275	1106.54	NaN	NaN	NaN	-0.16	-8.8683e-05	NaN	NaN	NaN	NaN	NaN	16.34	0.25252	16.34	16.214	16.466	0								0	0	0	3.5014e-18
ARVITEEEK	9	1	1	Unmodified	_ARVITEEEK_			0	0	1	sp|P26373|RL13_HUMAN;sp|P26373-2|RL13_HUMAN	sp|P26373|RL13_HUMAN	sp|P26373|RL13_HUMAN	ISO-MSMS	0	16062020_SKO_IP_Cep78	1	exp_1	537.793	2	537.793	1073.57	NaN	NaN	NaN	-0.61933	-0.00033307	NaN	NaN	NaN	NaN	NaN	6.2595	0.13401	6.2595	6.1506	6.2846	0								0	0	0	7.343e-35
ASGNYATVISHNPETK	16	1	0	Unmodified	_ASGNYATVISHNPETK_			0	0	0	sp|P62917|RL8_HUMAN	sp|P62917|RL8_HUMAN	sp|P62917|RL8_HUMAN	ISO-MSMS	2	16062020_SKO_IP_Cep78	1	exp_1	849.423	2	844.916	1687.82	NaN	NaN	NaN	-0.045749	-3.8654e-05	NaN	NaN	NaN	NaN	NaN	19.01	0.28604	19.01	18.892	19.178	3.5527e-15								0	0	0	6.7603e-155
ASGTLREYK	9	1	1	Unmodified	_ASGTLREYK_			0	0	1	sp|Q02543|RL18A_HUMAN	sp|Q02543|RL18A_HUMAN	sp|Q02543|RL18A_HUMAN	ISO-MSMS	2	16062020_SKO_IP_Cep78	1	exp_1	521.787	2	512.775	1023.53	NaN	NaN	NaN	0.4388	0.000225	NaN	NaN	NaN	NaN	NaN	6.3105	0.10051	6.3105	6.2679	6.3684	0								0	0	0	0.021796
ASGTLREYK	9	1	1	Unmodified	_ASGTLREYK_			0	0	1	sp|Q02543|RL18A_HUMAN	sp|Q02543|RL18A_HUMAN	sp|Q02543|RL18A_HUMAN	ISO-MSMS	0	16062020_SKO_IP_Cep78	1	exp_1	512.775	2	512.775	1023.53	NaN	NaN	NaN	1.4507	0.00074389	NaN	NaN	NaN	NaN	NaN	6.3172	0.16751	6.3172	6.2176	6.3851	0								0	0	0	2.2264e-60
ASLENSLEETK	11	1	0	Unmodified	_ASLENSLEETK_			0	0	0	sp|P02533|K1C14_HUMAN;CON__P02533;CON__Q9Z2K1;CON__Q3ZAW8;sp|P08779|K1C16_HUMAN;CON__P08779	sp|P02533|K1C14_HUMAN;sp|P08779|K1C16_HUMAN	sp|P02533|K1C14_HUMAN	ISO-MSMS	0	16062020_SKO_IP_Cep78	1	exp_1	610.804	2	610.804	1219.59	NaN	NaN	NaN	1.6494	0.0010074	NaN	NaN	NaN	NaN	NaN	22.142	0.34371	22.142	21.95	22.294	-3.5527e-15								0	0	0	2.806e-20
ASNIVMLR	8	0	1	Oxidation (M)	_ASNIVM(ox)LR_	ASNIVM(1)LR	ASNIVM(127.12)LR	0	1	0	sp|P98175-2|RBM10_HUMAN;sp|P98175|RBM10_HUMAN	sp|P98175-2|RBM10_HUMAN	sp|P98175-2|RBM10_HUMAN	MULTI-MSMS		16062020_SKO_IP_Cep78	1	exp_1	460.255	2	460.255	918.496	40451	1.3435	0.00061835	-0.45811	-0.00021085	0.88539	0.00040751	460.255	463.265	465.259	20.098	0.4882	20.098	19.785	20.273	0					186	28	11	0	0	0	1.5953e-25
ASTTLDIK	8	1	0	Unmodified	_ASTTLDIK_			0	0	0	sp|P46821|MAP1B_HUMAN	sp|P46821|MAP1B_HUMAN	sp|P46821|MAP1B_HUMAN	MULTI-MSMS		16062020_SKO_IP_Cep78	1	exp_1	428.748	2	424.74	847.465	42737.2	1.6062	0.00068222	1.8322	0.0007782	3.4384	0.0014604	424.741	426.753	428.747	16.653	0.55625	16.653	16.365	16.921	0					154	32	9	0	0	0	1.3181e-06
ASTVVAVGLTIAAAGFAGR	19	0	1	Acetyl (Protein N-term)	_(ac)ASTVVAVGLTIAAAGFAGR_			1	0	0	sp|Q96DA6|TIM14_HUMAN	sp|Q96DA6|TIM14_HUMAN	sp|Q96DA6|TIM14_HUMAN	ISO-MSMS	0	16062020_SKO_IP_Cep78	1	exp_1	887.999	2	887.497	1772.98	NaN	NaN	NaN	-1.1006	-0.00097675	NaN	NaN	NaN	NaN	NaN	116.94	0.051319	116.94	116.9	116.95	0								0	0	0	1.868e-15
ATAGDTHLGGEDFDNR	16	0	1	Unmodified	_ATAGDTHLGGEDFDNR_			0	0	0	sp|P0DMV9|HS71B_HUMAN;sp|P0DMV8|HS71A_HUMAN;sp|P0DMV8-2|HS71A_HUMAN;sp|P34931|HS71L_HUMAN;sp|P17066|HSP76_HUMAN;sp|P48741|HSP77_HUMAN	sp|P0DMV9|HS71B_HUMAN;sp|P17066|HSP76_HUMAN	sp|P0DMV9|HS71B_HUMAN	MULTI-MSMS		16062020_SKO_IP_Cep78	1	exp_1	841.378	2	838.369	1674.72	30360.6	-0.34317	-0.00028771	0.22776	0.00019094	-0.11542	-9.6762e-05	838.369	841.379	843.374	19.507	0.30381	19.507	19.363	19.666	3.5527e-15					162	17	14	0	0	0	0
ATAVMPDGQFK	11	1	0	Oxidation (M)	_ATAVM(ox)PDGQFK_	ATAVM(1)PDGQFK	ATAVM(92.45)PDGQFK	0	1	0	sp|Q06830|PRDX1_HUMAN	sp|Q06830|PRDX1_HUMAN	sp|Q06830|PRDX1_HUMAN	ISO-MSMS	0	16062020_SKO_IP_Cep78	1	exp_1	590.788	2	590.787	1179.56	NaN	NaN	NaN	-0.23998	-0.00014178	NaN	NaN	NaN	NaN	NaN	17.231	0.26939	17.231	17.073	17.342	0								0	0	0	0.0073886
ATAVMPDGQFK	11	1	0	Oxidation (M)	_ATAVM(ox)PDGQFK_	ATAVM(1)PDGQFK	ATAVM(74.17)PDGQFK	0	1	0	sp|Q06830|PRDX1_HUMAN	sp|Q06830|PRDX1_HUMAN	sp|Q06830|PRDX1_HUMAN	ISO-MSMS	2	16062020_SKO_IP_Cep78	1	exp_1	594.797	2	590.787	1179.56	NaN	NaN	NaN	1.7634	0.0010418	NaN	NaN	NaN	NaN	NaN	17.235	0.15184	17.235	17.173	17.325	0								0	0	0	0.020601
ATFDAISK	8	1	0	Unmodified	_ATFDAISK_			0	0	0	sp|P15880|RS2_HUMAN	sp|P15880|RS2_HUMAN	sp|P15880|RS2_HUMAN	MULTI-MSMS		16062020_SKO_IP_Cep78	1	exp_1	426.727	2	426.727	851.439	41962.5	0.58355	0.00024902	-0.015048	-6.4215e-06	0.5685	0.00024259	426.727	428.739	430.734	19.398	0.64073	19.398	19.161	19.802	0					187	37	12	0	0	0	0.00046391
ATLSSIR	7	0	1	Unmodified	_ATLSSIR_			0	0	0	sp|P46779|RL28_HUMAN;sp|P46779-2|RL28_HUMAN;sp|P46779-3|RL28_HUMAN	sp|P46779|RL28_HUMAN	sp|P46779|RL28_HUMAN	MULTI-MSMS		16062020_SKO_IP_Cep78	1	exp_1	374.222	2	374.222	746.429	44417.6	1.2571	0.00047044	-1.2183	-0.00045593	0.038781	1.4513e-05	374.221	377.231	379.225	13.8	0.3025	13.8	13.674	13.976	1.7764e-15					88	17	8	0	0	0	2.5716e-42
ATVEELK	7	1	0	Unmodified	_ATVEELK_			0	0	0	sp|O95232|LC7L3_HUMAN	sp|O95232|LC7L3_HUMAN	sp|O95232|LC7L3_HUMAN	MULTI-MSMS		16062020_SKO_IP_Cep78	1	exp_1	399.23	2	395.221	788.428	44238.5	1.0178	0.00040226	-0.63964	-0.0002528	0.37816	0.00014946	395.221	397.233	399.228	12	0.45459	12	11.721	12.176	0					125	26	7	0	0	0	0.0006404
ATVLTTER	8	0	1	Unmodified	_ATVLTTER_			0	0	0	sp|Q9UMS4|PRP19_HUMAN	sp|Q9UMS4|PRP19_HUMAN	sp|Q9UMS4|PRP19_HUMAN	MSMS	0	16062020_SKO_IP_Cep78	1	exp_1	445.751	2	445.751	889.487	NaN	NaN	NaN	NaN	NaN	NaN	NaN	NaN	NaN	NaN	12.828	1	12.828	12.328	13.328	0								0	0	0	5.9719e-05
ATVLTTERK	9	1	1	Unmodified	_ATVLTTERK_			0	0	1	sp|Q9UMS4|PRP19_HUMAN	sp|Q9UMS4|PRP19_HUMAN	sp|Q9UMS4|PRP19_HUMAN	ISO-MSMS	2	16062020_SKO_IP_Cep78	1	exp_1	518.81	2	509.798	1017.58	NaN	NaN	NaN	-0.3562	-0.00018159	NaN	NaN	NaN	NaN	NaN	6.4636	0.15083	6.4636	6.3684	6.5192	0								0	0	0	0.0046558
AVARIPR	7	0	2	Unmodified	_AVARIPR_			0	0	1	sp|P36578|RL4_HUMAN	sp|P36578|RL4_HUMAN	sp|P36578|RL4_HUMAN	ISO-MSMS	0	16062020_SKO_IP_Cep78	1	exp_1	391.755	2	391.753	781.492	NaN	NaN	NaN	1.3422	0.0005258	NaN	NaN	NaN	NaN	NaN	7.2356	0.10181	7.2356	7.185	7.2868	-8.8818e-16								0	0	0	6.5878e-05
AVDQHNAEAQDIFGK	15	1	0	Unmodified	_AVDQHNAEAQDIFGK_			0	0	0	sp|P52732|KIF11_HUMAN	sp|P52732|KIF11_HUMAN	sp|P52732|KIF11_HUMAN	ISO-MSMS	2	16062020_SKO_IP_Cep78	1	exp_1	826.405	2	821.895	1641.77	NaN	NaN	NaN	-1.0409	-0.00085548	NaN	NaN	NaN	NaN	NaN	25.783	0.16871	25.783	25.72	25.889	3.5527e-15								0	0	0	5.0189e-14
AVVGVVAGGGR	11	0	1	Unmodified	_AVVGVVAGGGR_			0	0	0	sp|P62917|RL8_HUMAN	sp|P62917|RL8_HUMAN	sp|P62917|RL8_HUMAN	ISO-MSMS	2	16062020_SKO_IP_Cep78	1	exp_1	476.285	2	471.28	940.545	NaN	NaN	NaN	0.035741	1.6844e-05	NaN	NaN	NaN	NaN	NaN	17.402	0.23649	17.402	17.275	17.511	-3.5527e-15								0	0	0	0.0019152
AVVGVVAGGGR	11	0	1	Unmodified	_AVVGVVAGGGR_			0	0	0	sp|P62917|RL8_HUMAN	sp|P62917|RL8_HUMAN	sp|P62917|RL8_HUMAN	ISO-MSMS	0	16062020_SKO_IP_Cep78	1	exp_1	471.281	2	471.28	940.545	NaN	NaN	NaN	0.59266	0.00027931	NaN	NaN	NaN	NaN	NaN	17.407	0.3038	17.407	17.292	17.595	0								0	0	0	0.0019898
AVVGVVAGGGR	11	0	1	Unmodified	_AVVGVVAGGGR_			0	0	0	sp|P62917|RL8_HUMAN	sp|P62917|RL8_HUMAN	sp|P62917|RL8_HUMAN	MSMS	1	16062020_SKO_IP_Cep78	1	exp_1	474.29	2	471.28	940.545	NaN	NaN	NaN	NaN	NaN	NaN	NaN	NaN	NaN	NaN	17.425	1	17.425	16.925	17.925	0								0	0	0	0.005149
DAIHFYNK	8	1	0	Unmodified	_DAIHFYNK_			0	0	0	sp|P31948-3|STIP1_HUMAN;sp|P31948|STIP1_HUMAN;sp|P31948-2|STIP1_HUMAN	sp|P31948-3|STIP1_HUMAN	sp|P31948-3|STIP1_HUMAN	ISO-MSMS	0	16062020_SKO_IP_Cep78	1	exp_1	504.751	2	504.251	1006.49	NaN	NaN	NaN	-2.1943	-0.0011065	NaN	NaN	NaN	NaN	NaN	20.651	0.25189	20.651	20.543	20.795	0								0	0	0	0.012118
DDEVQVVR	8	0	1	Unmodified	_DDEVQVVR_			0	0	0	sp|P61254|RL26_HUMAN;sp|Q9UNX3|RL26L_HUMAN	sp|P61254|RL26_HUMAN	sp|P61254|RL26_HUMAN	MULTI-MSMS		16062020_SKO_IP_Cep78	1	exp_1	483.255	2	480.243	958.472	40001.3	1.6824	0.00080796	-0.33728	-0.00016198	1.3451	0.00064598	480.243	483.254	485.248	17.316	0.35451	17.316	17.157	17.511	-3.5527e-15					168	20	12	0	0	0	4.5081e-24
DDNPNLPR	8	0	1	Unmodified	_DDNPNLPR_			0	0	0	sp|P02768|ALBU_HUMAN;CON__P02768-1;sp|P02768-3|ALBU_HUMAN	sp|P02768|ALBU_HUMAN	sp|P02768|ALBU_HUMAN	ISO-MSMS	0	16062020_SKO_IP_Cep78	1	exp_1	470.728	2	470.728	939.441	NaN	NaN	NaN	0.036348	1.711e-05	NaN	NaN	NaN	NaN	NaN	15.476	0.38759	15.476	15.355	15.742	0								0	0	0	0.017831
DDYSRDDYR	9	0	2	Unmodified	_DDYSRDDYR_			0	0	1	sp|P23588|IF4B_HUMAN;sp|P23588-2|IF4B_HUMAN	sp|P23588|IF4B_HUMAN	sp|P23588|IF4B_HUMAN	MULTI-MSMS		16062020_SKO_IP_Cep78	1	exp_1	602.747	2	602.747	1203.48	35570.6	0.6755	0.00040715	0.18206	0.00010974	0.85756	0.00051689	602.747	608.768	612.755	10.656	0.42206	10.656	10.526	10.948	0					109	24	9	0	0	0	2.0698e-38
DEREQLR	7	0	2	Unmodified	_DEREQLR_			0	0	1	sp|P19474|RO52_HUMAN	sp|P19474|RO52_HUMAN	sp|P19474|RO52_HUMAN	MULTI-MSMS		16062020_SKO_IP_Cep78	1	exp_1	473.242	2	473.241	944.468	40122.5	0.74281	0.00035153	0.51746	0.00024488	1.2603	0.00059641	473.241	479.262	483.249	6.3064	0.35188	6.3064	6.2176	6.5695	0					49	20	8	0	0	0	7.7294e-118
DETEFYLGK	9	1	0	Unmodified	_DETEFYLGK_			0	0	0	sp|P18077|RL35A_HUMAN	sp|P18077|RL35A_HUMAN	sp|P18077|RL35A_HUMAN	MULTI-MSMS		16062020_SKO_IP_Cep78	1	exp_1	555.268	2	551.259	1100.5	37671.6	2.3538	0.0012975	0.34602	0.00019074	2.6998	0.0014883	551.259	553.272	555.266	39.136	0.40869	39.136	38.923	39.332	7.1054e-15					144	23	9	0	0	0	4.3509e-19
DEVEAVK	7	1	0	Unmodified	_DEVEAVK_			0	0	0	sp|Q9Y2T3-2|GUAD_HUMAN;sp|Q9Y2T3|GUAD_HUMAN;sp|Q9Y2T3-3|GUAD_HUMAN	sp|Q9Y2T3-2|GUAD_HUMAN	sp|Q9Y2T3-2|GUAD_HUMAN	MULTI-MSMS		16062020_SKO_IP_Cep78	1	exp_1	395.203	2	395.203	788.392	42685.5	1.3288	0.00052513	-0.93278	-0.00036864	0.39598	0.00015649	395.203	397.215	399.21	12.633	0.38769	12.633	12.429	12.816	0					101	22	7	0	0	0	0.02783
DFSLILDDVAITELSFSR	18	0	1	Unmodified	_DFSLILDDVAITELSFSR_			0	0	0	sp|Q99623-2|PHB2_HUMAN;sp|Q99623|PHB2_HUMAN	sp|Q99623-2|PHB2_HUMAN	sp|Q99623-2|PHB2_HUMAN	ISO-MSMS	0	16062020_SKO_IP_Cep78	1	exp_1	1021.54	2	1021.03	2040.04	NaN	NaN	NaN	2.0632	0.0021066	NaN	NaN	NaN	NaN	NaN	116.74	0.1539	116.74	116.66	116.82	0								0	0	0	1.4955e-17
DGLGSDNIGSR	11	0	1	Unmodified	_DGLGSDNIGSR_			0	0	0	sp|P98175-2|RBM10_HUMAN;sp|P98175|RBM10_HUMAN;sp|P98175-4|RBM10_HUMAN;sp|P98175-3|RBM10_HUMAN	sp|P98175-2|RBM10_HUMAN	sp|P98175-2|RBM10_HUMAN	MULTI-MSMS		16062020_SKO_IP_Cep78	1	exp_1	545.759	2	545.76	1089.51	37751.6	-0.1982	-0.00010817	-0.70381	-0.00038411	-0.90201	-0.00049228	545.76	548.77	550.764	17.831	0.36936	17.831	17.663	18.032	0					110	21	8	0	0	0	3.397e-21
DGLIIRK	7	1	1	Unmodified	_DGLIIRK_			0	0	1	sp|P84098|RL19_HUMAN	sp|P84098|RL19_HUMAN	sp|P84098|RL19_HUMAN	MULTI-MSMS		16062020_SKO_IP_Cep78	1	exp_1	407.761	2	407.761	813.507	43045.9	2.4823	0.0010122	-0.010173	-4.1482e-06	2.4721	0.001008	407.761	412.784	416.772	15.539	0.28598	15.539	15.388	15.674	-1.7764e-15					101	16	9	0	0	0	0.0037273
DHAVDLIQK	9	1	0	Unmodified	_DHAVDLIQK_			0	0	0	sp|P0C0L4-2|CO4A_HUMAN;sp|P0C0L5|CO4B_HUMAN;sp|P0C0L4|CO4A_HUMAN	sp|P0C0L4-2|CO4A_HUMAN	sp|P0C0L4-2|CO4A_HUMAN	ISO-MSMS	0	16062020_SKO_IP_Cep78	1	exp_1	519.783	2	519.783	1037.55	NaN	NaN	NaN	-0.53269	-0.00027688	NaN	NaN	NaN	NaN	NaN	18.447	0.35371	18.447	18.285	18.639	0								0	0	0	1.3305e-74
DIAAHIK	7	1	0	Unmodified	_DIAAHIK_			0	0	0	sp|P63167|DYL1_HUMAN	sp|P63167|DYL1_HUMAN	sp|P63167|DYL1_HUMAN	MULTI-MSMS		16062020_SKO_IP_Cep78	1	exp_1	384.224	2	384.224	766.434	44563.4	0.26793	0.00010294	0.20078	7.7143e-05	0.4687	0.00018009	384.224	386.237	388.231	11.685	0.57249	11.685	11.519	12.092	0					203	33	10	0	0	0	0.027867
DIAAHIKK	8	2	0	Unmodified	_DIAAHIKK_			0	0	1	sp|P63167|DYL1_HUMAN	sp|P63167|DYL1_HUMAN	sp|P63167|DYL1_HUMAN	ISO-MSMS	1	16062020_SKO_IP_Cep78	1	exp_1	452.298	2	448.272	894.529	NaN	NaN	NaN	0.062157	2.7863e-05	NaN	NaN	NaN	NaN	NaN	6.7285	0.28315	6.7285	6.6201	6.9033	0								0	0	0	0.0048137
DIIHDPGR	8	0	1	Unmodified	_DIIHDPGR_			0	0	0	sp|P62917|RL8_HUMAN	sp|P62917|RL8_HUMAN	sp|P62917|RL8_HUMAN	MULTI-MSMS		16062020_SKO_IP_Cep78	1	exp_1	467.246	2	461.741	921.467	40556.4	2.103	0.00097105	-0.21073	-9.7304e-05	1.8923	0.00087374	461.74	464.749	466.745	15.405	0.57189	15.405	15.204	15.776	-1.7764e-15					174	34	8	0	0	0	0.010161
DIQLARR	7	0	2	Unmodified	_DIQLARR_			0	0	1	sp|Q6NXT2|H3C_HUMAN;sp|Q71DI3|H32_HUMAN;sp|Q16695|H31T_HUMAN;sp|P84243|H33_HUMAN;sp|P68431|H31_HUMAN	sp|Q6NXT2|H3C_HUMAN	sp|Q6NXT2|H3C_HUMAN	ISO-MSMS	0	16062020_SKO_IP_Cep78	1	exp_1	436.26	2	436.259	870.504	NaN	NaN	NaN	-0.88918	-0.00038791	NaN	NaN	NaN	NaN	NaN	13.299	0.15105	13.299	13.204	13.355	1.7764e-15								0	0	0	0.015969
DLPEHAVLK	9	1	0	Unmodified	_DLPEHAVLK_			0	0	0	sp|Q00839-2|HNRPU_HUMAN;sp|Q00839|HNRPU_HUMAN	sp|Q00839-2|HNRPU_HUMAN	sp|Q00839-2|HNRPU_HUMAN	MULTI-MSMS		16062020_SKO_IP_Cep78	1	exp_1	511.288	2	511.287	1020.56	39122	1.2994	0.00066437	-0.62204	-0.00031804	0.67736	0.00034633	511.287	513.3	515.295	20.702	0.25184	20.702	20.56	20.812	-3.5527e-15					105	14	10	0	0	0	4.5008e-19
DLSTPGLEK	9	1	0	Unmodified	_DLSTPGLEK_			0	0	0	sp|P46821|MAP1B_HUMAN	sp|P46821|MAP1B_HUMAN	sp|P46821|MAP1B_HUMAN	ISO-MSMS	0	16062020_SKO_IP_Cep78	1	exp_1	480.257	2	480.256	958.497	NaN	NaN	NaN	0.097848	4.6992e-05	NaN	NaN	NaN	NaN	NaN	24.181	0.45796	24.181	23.941	24.399	0								0	0	0	0.011774
DLTNVQNLQK	10	1	0	Unmodified	_DLTNVQNLQK_			0	0	0	sp|Q13813-3|SPTN1_HUMAN;sp|Q13813|SPTN1_HUMAN;sp|Q13813-2|SPTN1_HUMAN	sp|Q13813-3|SPTN1_HUMAN	sp|Q13813-3|SPTN1_HUMAN	ISO-MSMS	2	16062020_SKO_IP_Cep78	1	exp_1	590.826	2	586.817	1171.62	NaN	NaN	NaN	0.33247	0.0001951	NaN	NaN	NaN	NaN	NaN	26.788	0.23635	26.788	26.668	26.904	0								0	0	0	0.011929
DLTNVQNLQK	10	1	0	Unmodified	_DLTNVQNLQK_			0	0	0	sp|Q13813-3|SPTN1_HUMAN;sp|Q13813|SPTN1_HUMAN;sp|Q13813-2|SPTN1_HUMAN	sp|Q13813-3|SPTN1_HUMAN	sp|Q13813-3|SPTN1_HUMAN	ISO-MSMS	0	16062020_SKO_IP_Cep78	1	exp_1	586.817	2	586.817	1171.62	NaN	NaN	NaN	0.77256	0.00045335	NaN	NaN	NaN	NaN	NaN	26.824	0.28721	26.824	26.651	26.938	0								0	0	0	0.012231
DNNLLGK	7	1	0	Unmodified	_DNNLLGK_			0	0	0	sp|P11142|HSP7C_HUMAN;sp|P11142-2|HSP7C_HUMAN;sp|P54652|HSP72_HUMAN	sp|P11142|HSP7C_HUMAN	sp|P11142|HSP7C_HUMAN	MULTI-MSMS		16062020_SKO_IP_Cep78	1	exp_1	387.213	2	387.211	772.408	43523.3	1.8189	0.0007043	0.33905	0.00013128	2.158	0.00083559	387.211	389.223	391.219	15.963	0.70722	15.963	15.574	16.281	0					267	41	10	0	0	0	2.6858e-05
DNNLLGR	7	0	1	Unmodified	_DNNLLGR_			0	0	0	sp|P0DMV9|HS71B_HUMAN;sp|P0DMV8|HS71A_HUMAN;sp|P0DMV8-2|HS71A_HUMAN;sp|P34931|HS71L_HUMAN;sp|P17066|HSP76_HUMAN	sp|P0DMV9|HS71B_HUMAN;sp|P17066|HSP76_HUMAN	sp|P0DMV9|HS71B_HUMAN	MULTI-MSMS		16062020_SKO_IP_Cep78	1	exp_1	404.226	2	401.214	800.414	42950.7	1.7531	0.00070335	0.37428	0.00015017	2.1273	0.00085352	401.214	404.224	406.218	18.386	0.74146	18.386	18.116	18.858	0					355	43	12	0	0	0	9.1728e-69
DPQALSEHLK	10	1	0	Unmodified	_DPQALSEHLK_			0	0	0	sp|P31948-3|STIP1_HUMAN;sp|P31948|STIP1_HUMAN;sp|P31948-2|STIP1_HUMAN	sp|P31948-3|STIP1_HUMAN	sp|P31948-3|STIP1_HUMAN	ISO-MSMS	0	16062020_SKO_IP_Cep78	1	exp_1	569.299	2	569.299	1136.58	NaN	NaN	NaN	1.6659	0.00094838	NaN	NaN	NaN	NaN	NaN	18.226	0.23612	18.226	18.083	18.319	0								0	0	0	0.013231
DQALSNAQAK	10	1	0	Unmodified	_DQALSNAQAK_			0	0	0	sp|Q4VCS5-2|AMOT_HUMAN;sp|Q4VCS5|AMOT_HUMAN	sp|Q4VCS5-2|AMOT_HUMAN	sp|Q4VCS5-2|AMOT_HUMAN	ISO-MSMS	1	16062020_SKO_IP_Cep78	1	exp_1	525.281	2	523.267	1044.52	NaN	NaN	NaN	-0.013791	-7.2162e-06	NaN	NaN	NaN	NaN	NaN	6.8445	0.26611	6.8445	6.6874	6.9535	0								0	0	0	1.1632e-12
DQALSNAQAK	10	1	0	Unmodified	_DQALSNAQAK_			0	0	0	sp|Q4VCS5-2|AMOT_HUMAN;sp|Q4VCS5|AMOT_HUMAN	sp|Q4VCS5-2|AMOT_HUMAN	sp|Q4VCS5-2|AMOT_HUMAN	ISO-MSMS	0	16062020_SKO_IP_Cep78	1	exp_1	523.269	2	523.267	1044.52	NaN	NaN	NaN	0.056573	2.9603e-05	NaN	NaN	NaN	NaN	NaN	6.8446	0.16766	6.8446	6.7691	6.9368	0								0	0	0	3.998e-12
DQIVDLTVGNNK	12	1	0	Unmodified	_DQIVDLTVGNNK_			0	0	0	sp|P35527|K1C9_HUMAN;CON__P35527	sp|P35527|K1C9_HUMAN	sp|P35527|K1C9_HUMAN	ISO-MSMS	0	16062020_SKO_IP_Cep78	1	exp_1	658.35	2	658.346	1314.68	NaN	NaN	NaN	1.6495	0.0010859	NaN	NaN	NaN	NaN	NaN	40.288	0.35799	40.288	40.078	40.436	0								0	0	0	3.9131e-31
DQTPDENDQVIVK	13	1	0	Unmodified	_DQTPDENDQVIVK_			0	0	0	sp|Q9NZI8|IF2B1_HUMAN;sp|Q9NZI8-2|IF2B1_HUMAN	sp|Q9NZI8|IF2B1_HUMAN	sp|Q9NZI8|IF2B1_HUMAN	ISO-MSMS	2	16062020_SKO_IP_Cep78	1	exp_1	754.869	2	750.862	1499.71	NaN	NaN	NaN	-2.5559	-0.0019191	NaN	NaN	NaN	NaN	NaN	22.84	0.18541	22.84	22.727	22.913	0								0	0	0	0.0058348
DQTPDENDQVIVK	13	1	0	Unmodified	_DQTPDENDQVIVK_			0	0	0	sp|Q9NZI8|IF2B1_HUMAN;sp|Q9NZI8-2|IF2B1_HUMAN	sp|Q9NZI8|IF2B1_HUMAN	sp|Q9NZI8|IF2B1_HUMAN	ISO-MSMS	0	16062020_SKO_IP_Cep78	1	exp_1	750.808	2	750.862	1499.71	NaN	NaN	NaN	1.5191	0.0011406	NaN	NaN	NaN	NaN	NaN	22.84	0.20257	22.84	22.727	22.93	0								0	0	0	0.0041744
DQVANSAFVER	11	0	1	Unmodified	_DQVANSAFVER_			0	0	0	sp|P07900|HS90A_HUMAN;sp|P07900-2|HS90A_HUMAN	sp|P07900|HS90A_HUMAN	sp|P07900|HS90A_HUMAN	ISO-MSMS	0	16062020_SKO_IP_Cep78	1	exp_1	618.305	2	618.304	1234.59	NaN	NaN	NaN	1.3337	0.00082461	NaN	NaN	NaN	NaN	NaN	23.915	0.35625	23.915	23.754	24.11	0								0	0	0	0.0051139
DQVANSAFVER	11	0	1	Unmodified	_DQVANSAFVER_			0	0	0	sp|P07900|HS90A_HUMAN;sp|P07900-2|HS90A_HUMAN	sp|P07900|HS90A_HUMAN	sp|P07900|HS90A_HUMAN	ISO-MSMS	2	16062020_SKO_IP_Cep78	1	exp_1	623.307	2	618.304	1234.59	NaN	NaN	NaN	0.037295	2.3059e-05	NaN	NaN	NaN	NaN	NaN	23.919	0.22036	23.919	23.805	24.025	0								0	0	0	0.0035556
DREVAEGGLPR	11	0	2	Unmodified	_DREVAEGGLPR_			0	0	1	sp|Q9BUA3|CK084_HUMAN	sp|Q9BUA3|CK084_HUMAN	sp|Q9BUA3|CK084_HUMAN	MULTI-MSMS		16062020_SKO_IP_Cep78	1	exp_1	609.825	2	599.812	1197.61	35844.2	2.7915	0.0016744	2.1451	0.0012866	4.9366	0.002961	599.814	605.833	609.822	15.702	0.23599	15.702	15.574	15.81	0					63	13	8	0	0	0	0.0059392
DRFVNDYDK	9	1	1	Unmodified	_DRFVNDYDK_			0	0	1	sp|Q14257|RCN2_HUMAN;sp|Q14257-2|RCN2_HUMAN	sp|Q14257|RCN2_HUMAN	sp|Q14257|RCN2_HUMAN	ISO-MSMS	0	16062020_SKO_IP_Cep78	1	exp_1	586.272	2	586.273	1170.53	NaN	NaN	NaN	0.84377	0.00049468	NaN	NaN	NaN	NaN	NaN	15.428	0.46353	15.428	15.279	15.742	0								0	0	0	3.7742e-11
DRTKNNEVSMEESK	14	2	1	Oxidation (M)	_DRTKNNEVSM(ox)EESK_	DRTKNNEVSM(1)EESK	DRTKNNEVSM(60.1)EESK	0	1	2		REV__sp|Q8TF05-2|PP4R1_HUMAN	REV__sp|Q8TF05-2|PP4R1_HUMAN	ISO-MSMS	0	16062020_SKO_IP_Cep78	1	exp_1	841.89	2	841.886	1681.76	NaN	NaN	NaN	2.3401	0.0019701	NaN	NaN	NaN	NaN	NaN	27.75	0.55756	27.75	27.394	27.951	0								0	0	0	0.0078904
DSSEDDISRSENEK	14	1	1	Unmodified	_DSSEDDISRSENEK_			0	0	1	sp|Q5W0B1|RN219_HUMAN	sp|Q5W0B1|RN219_HUMAN	sp|Q5W0B1|RN219_HUMAN	ISO-MSMS	0	16062020_SKO_IP_Cep78	1	exp_1	805.841	2	805.842	1609.67	NaN	NaN	NaN	-0.50194	-0.00040449	NaN	NaN	NaN	NaN	NaN	9.7512	0.30344	9.7512	9.5997	9.9031	0								0	0	0	5.9648e-145
DSYVGDEAQSK	11	1	0	Unmodified	_DSYVGDEAQSK_			0	0	0	sp|P63261|ACTG_HUMAN;sp|P60709|ACTB_HUMAN;sp|P63267|ACTH_HUMAN;sp|P68133|ACTS_HUMAN;sp|P68032|ACTC_HUMAN;sp|P62736|ACTA_HUMAN	sp|P63261|ACTG_HUMAN	sp|P63261|ACTG_HUMAN	ISO-MSMS	0	16062020_SKO_IP_Cep78	1	exp_1	599.765	2	599.765	1197.51	NaN	NaN	NaN	-0.35977	-0.00021577	NaN	NaN	NaN	NaN	NaN	12.593	0.3869	12.593	12.362	12.748	0								0	0	0	0.0044792
DTTVISHSPNTSYDTALEAR	20	0	1	Unmodified	_DTTVISHSPNTSYDTALEAR_			0	0	0	sp|Q4VCS5-2|AMOT_HUMAN;sp|Q4VCS5|AMOT_HUMAN	sp|Q4VCS5-2|AMOT_HUMAN	sp|Q4VCS5-2|AMOT_HUMAN	ISO-MSMS	1	16062020_SKO_IP_Cep78	1	exp_1	1092.53	2	1089.52	2177.02	NaN	NaN	NaN	-1.4694	-0.0016009	NaN	NaN	NaN	NaN	NaN	35.308	0.2558	35.308	35.177	35.433	0								0	0	0	9.3314e-125
DVDNAYMIK	9	1	0	Oxidation (M)	_DVDNAYM(ox)IK_	DVDNAYM(1)IK	DVDNAYM(86.1)IK	0	1	0	sp|P35908|K22E_HUMAN;CON__P35908v2;CON__P35908	sp|P35908|K22E_HUMAN	sp|P35908|K22E_HUMAN	ISO-MSMS	0	16062020_SKO_IP_Cep78	1	exp_1	543.256	2	542.753	1083.49	NaN	NaN	NaN	1.4455	0.00078454	NaN	NaN	NaN	NaN	NaN	21.862	0.39735	21.862	21.637	22.034	0								0	0	0	0.014431
DVFRDPALK	9	1	1	Unmodified	_DVFRDPALK_			0	0	1	sp|P61353|RL27_HUMAN	sp|P61353|RL27_HUMAN	sp|P61353|RL27_HUMAN	MULTI-MSMS		16062020_SKO_IP_Cep78	1	exp_1	539.304	2	530.793	1059.57	39059.4	1.7312	0.00091889	0.24384	0.00012943	1.975	0.0010483	530.793	535.817	539.804	26.885	0.55776	26.885	26.583	27.141	0					205	32	10	0	0	0	0.0026849
DVNQQEFVR	9	0	1	Unmodified	_DVNQQEFVR_			0	0	0	sp|P39019|RS19_HUMAN	sp|P39019|RS19_HUMAN	sp|P39019|RS19_HUMAN	ISO-MSMS	0	16062020_SKO_IP_Cep78	1	exp_1	567.781	2	567.781	1133.55	NaN	NaN	NaN	1.3995	0.00079459	NaN	NaN	NaN	NaN	NaN	21.579	0.33745	21.579	21.425	21.763	0								0	0	0	0.015262
DVSGLHSK	8	1	0	Unmodified	_DVSGLHSK_			0	0	0	sp|P52732|KIF11_HUMAN	sp|P52732|KIF11_HUMAN	sp|P52732|KIF11_HUMAN	MULTI-MSMS		16062020_SKO_IP_Cep78	1	exp_1	421.723	2	421.722	841.429	42964.8	0.41862	0.00017654	0.68317	0.00028811	1.1018	0.00046465	421.722	423.734	425.729	1.0205	0.62165	1.0205	0.71514	1.3368	0					163	36	8	0	0	0	0.019747
DVSLLTQK	8	1	0	Unmodified	_DVSLLTQK_			0	0	0	sp|Q96DG6|CMBL_HUMAN	sp|Q96DG6|CMBL_HUMAN	sp|Q96DG6|CMBL_HUMAN	ISO-MSMS	0	16062020_SKO_IP_Cep78	1	exp_1	452.261	2	452.261	902.507	NaN	NaN	NaN	-0.692	-0.00031297	NaN	NaN	NaN	NaN	NaN	28.627	0.1435	28.627	28.524	28.667	0								0	0	0	0.010435
DYDRGYDSR	9	0	2	Unmodified	_DYDRGYDSR_			0	0	1	sp|P23588|IF4B_HUMAN;sp|P23588-2|IF4B_HUMAN	sp|P23588|IF4B_HUMAN	sp|P23588|IF4B_HUMAN	MULTI-MSMS		16062020_SKO_IP_Cep78	1	exp_1	573.744	2	573.744	1145.47	38616.1	-0.95046	-0.00054532	0.92553	0.00053102	-0.024929	-1.4303e-05	573.745	579.766	583.754	8.7415	0.42951	8.7415	8.6093	9.0388	1.7764e-15					144	31	9	0	0	0	4.2615e-92
DYLHYIRK	8	1	1	Unmodified	_DYLHYIRK_			0	0	1	sp|P62280|RS11_HUMAN	sp|P62280|RS11_HUMAN	sp|P62280|RS11_HUMAN	ISO-MSMS	0	16062020_SKO_IP_Cep78	1	exp_1	554.259	2	554.301	1106.59	NaN	NaN	NaN	2.6817	0.0014865	NaN	NaN	NaN	NaN	NaN	22.573	0.3317	22.573	22.396	22.727	0								0	0	0	0.0033745
DYQELMNTK	9	1	0	Oxidation (M)	_DYQELM(ox)NTK_	DYQELM(1)NTK	DYQELM(78.15)NTK	0	1	0	sp|P04264|K2C1_HUMAN;CON__P04264	sp|P04264|K2C1_HUMAN	sp|P04264|K2C1_HUMAN	ISO-MSMS	0	16062020_SKO_IP_Cep78	1	exp_1	579.263	2	579.261	1156.51	NaN	NaN	NaN	2.2621	0.0013103	NaN	NaN	NaN	NaN	NaN	16.641	0.18523	16.641	16.533	16.719	0								0	0	0	0.020132
EAADAELGQLR	11	0	1	Unmodified	_EAADAELGQLR_			0	0	0	sp|Q08378-4|GOGA3_HUMAN;sp|Q08378-2|GOGA3_HUMAN;sp|Q08378|GOGA3_HUMAN	sp|Q08378-4|GOGA3_HUMAN	sp|Q08378-4|GOGA3_HUMAN	MSMS	0	16062020_SKO_IP_Cep78	1	exp_1	586.799	2	586.799	1171.58	NaN	NaN	NaN	NaN	NaN	NaN	NaN	NaN	NaN	NaN	27.882	1	27.882	27.382	28.382	0								0	0	0	0.017347
EAFLNTEDK	9	1	0	Unmodified	_EAFLNTEDK_			0	0	0	sp|Q13813-3|SPTN1_HUMAN;sp|Q13813|SPTN1_HUMAN;sp|Q13813-2|SPTN1_HUMAN	sp|Q13813-3|SPTN1_HUMAN	sp|Q13813-3|SPTN1_HUMAN	ISO-MSMS	2	16062020_SKO_IP_Cep78	1	exp_1	537.765	2	533.756	1065.5	NaN	NaN	NaN	0.69932	0.00037327	NaN	NaN	NaN	NaN	NaN	20.602	0.28629	20.602	20.475	20.762	0								0	0	0	0.018648
EAGNINQSLLTLGR	14	0	1	Unmodified	_EAGNINQSLLTLGR_			0	0	0	sp|P52732|KIF11_HUMAN	sp|P52732|KIF11_HUMAN	sp|P52732|KIF11_HUMAN	MSMS	0	16062020_SKO_IP_Cep78	1	exp_1	743.407	2	743.405	1484.79	NaN	NaN	NaN	NaN	NaN	NaN	NaN	NaN	NaN	NaN	51.692	1	51.692	51.192	52.192	0								0	0	0	0.017502
EAIEGTYIDK	10	1	0	Unmodified	_EAIEGTYIDK_			0	0	0	sp|P62280|RS11_HUMAN	sp|P62280|RS11_HUMAN	sp|P62280|RS11_HUMAN	MULTI-MSMS		16062020_SKO_IP_Cep78	1	exp_1	569.58	2	569.785	1137.56	36973.4	0.78449	0.00044699	-0.12691	-7.231e-05	0.65759	0.00037468	569.785	571.798	573.793	23.754	0.9822	23.754	23.383	24.365	0					375	57	13	0	0	0	5.5143e-21
EAIEGTYIDKK	11	2	0	Unmodified	_EAIEGTYIDKK_			0	0	1	sp|P62280|RS11_HUMAN	sp|P62280|RS11_HUMAN	sp|P62280|RS11_HUMAN	ISO-MSMS	2	16062020_SKO_IP_Cep78	1	exp_1	641.847	2	633.832	1265.65	NaN	NaN	NaN	0.76948	0.00048772	NaN	NaN	NaN	NaN	NaN	17.289	0.1517	17.289	17.19	17.342	0								0	0	0	0.00039013
EAIEGTYIDKK	11	2	0	Unmodified	_EAIEGTYIDKK_			0	0	1	sp|P62280|RS11_HUMAN	sp|P62280|RS11_HUMAN	sp|P62280|RS11_HUMAN	ISO-MSMS	0	16062020_SKO_IP_Cep78	1	exp_1	633.834	2	633.832	1265.65	NaN	NaN	NaN	0.22407	0.00014203	NaN	NaN	NaN	NaN	NaN	17.267	0.1349	17.267	17.19	17.325	3.5527e-15								0	0	0	0.000981
EAQELSQNSAIK	12	1	0	Unmodified	_EAQELSQNSAIK_			0	0	0	sp|Q9NR30-2|DDX21_HUMAN;sp|Q9NR30|DDX21_HUMAN	sp|Q9NR30-2|DDX21_HUMAN	sp|Q9NR30-2|DDX21_HUMAN	ISO-MSMS	0	16062020_SKO_IP_Cep78	1	exp_1	659.34	2	659.336	1316.66	NaN	NaN	NaN	3.4676	0.0022863	NaN	NaN	NaN	NaN	NaN	15.745	0.16877	15.745	15.658	15.826	0								0	0	0	0.0021974
EATDAIGHLDR	11	0	1	Unmodified	_EATDAIGHLDR_			0	0	0	sp|Q12906-5|ILF3_HUMAN;sp|Q12906-4|ILF3_HUMAN;sp|Q12906-2|ILF3_HUMAN;sp|Q12906-6|ILF3_HUMAN;sp|Q12906-3|ILF3_HUMAN;sp|Q12906|ILF3_HUMAN;sp|Q12906-7|ILF3_HUMAN	sp|Q12906-5|ILF3_HUMAN	sp|Q12906-5|ILF3_HUMAN	ISO-MSMS	2	16062020_SKO_IP_Cep78	1	exp_1	604.301	2	599.297	1196.58	NaN	NaN	NaN	-1.2694	-0.00076074	NaN	NaN	NaN	NaN	NaN	19.041	0.16793	19.041	18.959	19.127	3.5527e-15								0	0	0	0.00217
EAVLLLK	7	1	0	Unmodified	_EAVLLLK_			0	0	0	sp|P36578|RL4_HUMAN	sp|P36578|RL4_HUMAN	sp|P36578|RL4_HUMAN	MULTI-MSMS		16062020_SKO_IP_Cep78	1	exp_1	393.262	2	393.26	784.506	43629.5	3.3067	0.0013004	0.10034	3.946e-05	3.407	0.0013398	393.26	395.273	397.267	35.631	0.59409	35.631	35.365	35.959	0					238	34	11	0	0	0	0.022718
EDDSSASTSQSTR	13	0	1	Unmodified	_EDDSSASTSQSTR_			0	0	0	sp|P23588|IF4B_HUMAN;sp|P23588-2|IF4B_HUMAN	sp|P23588|IF4B_HUMAN	sp|P23588|IF4B_HUMAN	MSMS	0	16062020_SKO_IP_Cep78	1	exp_1	685.784	2	685.787	1369.56	NaN	NaN	NaN	NaN	NaN	NaN	NaN	NaN	NaN	NaN	0.52159	1	0.52159	0.021591	1.0216	0								0	0	0	0.015018
EDIYSGGGGGGSR	13	0	1	Unmodified	_EDIYSGGGGGGSR_			0	0	0	sp|Q13151|ROA0_HUMAN	sp|Q13151|ROA0_HUMAN	sp|Q13151|ROA0_HUMAN	ISO-MSMS	0	16062020_SKO_IP_Cep78	1	exp_1	606.269	2	606.268	1210.52	NaN	NaN	NaN	-0.062378	-3.7817e-05	NaN	NaN	NaN	NaN	NaN	12.184	0.28662	12.184	12.075	12.362	0								0	0	0	0.0053106
EDQTEYLEER	10	0	1	Unmodified	_EDQTEYLEER_			0	0	0	sp|P08238|HS90B_HUMAN;sp|Q58FF7|H90B3_HUMAN;sp|Q58FF6|H90B4_HUMAN;sp|P07900|HS90A_HUMAN;sp|P07900-2|HS90A_HUMAN	sp|P08238|HS90B_HUMAN;sp|P07900|HS90A_HUMAN	sp|P07900|HS90A_HUMAN	ISO-MSMS	0	16062020_SKO_IP_Cep78	1	exp_1	656.288	2	656.289	1310.56	NaN	NaN	NaN	-2.574	-0.0016893	NaN	NaN	NaN	NaN	NaN	21.766	0.32373	21.766	21.627	21.95	0								0	0	0	1.6943e-12
EDQTEYLEER	10	0	1	Unmodified	_EDQTEYLEER_			0	0	0	sp|P08238|HS90B_HUMAN;sp|Q58FF7|H90B3_HUMAN;sp|Q58FF6|H90B4_HUMAN;sp|P07900|HS90A_HUMAN;sp|P07900-2|HS90A_HUMAN	sp|P08238|HS90B_HUMAN;sp|P07900|HS90A_HUMAN	sp|P07900|HS90A_HUMAN	ISO-MSMS	2	16062020_SKO_IP_Cep78	1	exp_1	661.782	2	656.289	1310.56	NaN	NaN	NaN	-1.0049	-0.0006595	NaN	NaN	NaN	NaN	NaN	21.779	0.1769	21.779	21.679	21.856	0								0	0	0	0.0068231
EDSQRPGAHLTVK	13	1	1	Unmodified	_EDSQRPGAHLTVK_			0	0	1	sp|P09651-3|ROA1_HUMAN;sp|P09651-2|ROA1_HUMAN;sp|P09651|ROA1_HUMAN;sp|Q32P51|RA1L2_HUMAN	sp|P09651-3|ROA1_HUMAN	sp|P09651-3|ROA1_HUMAN	ISO-MSMS	0	16062020_SKO_IP_Cep78	1	exp_1	719.876	2	719.376	1436.74	NaN	NaN	NaN	-1.957	-0.0014078	NaN	NaN	NaN	NaN	NaN	9.4474	0.11576	9.4474	9.3832	9.499	0								0	0	0	0.0029956
EDVFVHQTAIK	11	1	0	Unmodified	_EDVFVHQTAIK_			0	0	0	sp|P16989-2|YBOX3_HUMAN;sp|P16989-3|YBOX3_HUMAN;sp|P16989|YBOX3_HUMAN;sp|Q9Y2T7|YBOX2_HUMAN;sp|P67809|YBOX1_HUMAN	sp|P16989-2|YBOX3_HUMAN;sp|P67809|YBOX1_HUMAN	sp|P67809|YBOX1_HUMAN	MULTI-MSMS		16062020_SKO_IP_Cep78	1	exp_1	647.851	2	643.841	1285.67	34787.8	2.6242	0.0016896	0.43636	0.00028095	3.0606	0.0019705	643.841	646.35	647.848	24.264	0.83117	24.264	24.076	24.907	0					194	48	11	0	0	0	7.3149e-180
EEAEALYHSK	10	1	0	Unmodified	_EEAEALYHSK_			0	0	0	sp|P35908|K22E_HUMAN;CON__P35908v2;CON__P35908	sp|P35908|K22E_HUMAN	sp|P35908|K22E_HUMAN	ISO-MSMS	0	16062020_SKO_IP_Cep78	1	exp_1	588.78	2	588.78	1175.55	NaN	NaN	NaN	-1.3398	-0.00078885	NaN	NaN	NaN	NaN	NaN	12.547	0.25228	12.547	12.429	12.681	1.7764e-15								0	0	0	0.0098327
EEEEILMANK	10	1	0	Oxidation (M)	_EEEEILM(ox)ANK_	EEEEILM(1)ANK	EEEEILM(102.51)ANK	0	1	0	sp|Q4VCS5-2|AMOT_HUMAN;sp|Q4VCS5|AMOT_HUMAN	sp|Q4VCS5-2|AMOT_HUMAN	sp|Q4VCS5-2|AMOT_HUMAN	ISO-MSMS	1	16062020_SKO_IP_Cep78	1	exp_1	613.297	2	611.287	1220.56	NaN	NaN	NaN	0.32811	0.00020057	NaN	NaN	NaN	NaN	NaN	19.532	0.70796	19.532	19.144	19.852	-3.5527e-15								0	0	0	0.0036556
EEEEILMANK	10	1	0	Oxidation (M)	_EEEEILM(ox)ANK_	EEEEILM(1)ANK	EEEEILM(122.19)ANK	0	1	0	sp|Q4VCS5-2|AMOT_HUMAN;sp|Q4VCS5|AMOT_HUMAN	sp|Q4VCS5-2|AMOT_HUMAN	sp|Q4VCS5-2|AMOT_HUMAN	ISO-MSMS	0	16062020_SKO_IP_Cep78	1	exp_1	611.288	2	611.287	1220.56	NaN	NaN	NaN	0.2662	0.00016272	NaN	NaN	NaN	NaN	NaN	19.556	0.5231	19.556	19.295	19.818	0								0	0	0	0.005422
EEEISNLK	8	1	0	Unmodified	_EEEISNLK_			0	0	0	sp|Q13464|ROCK1_HUMAN	sp|Q13464|ROCK1_HUMAN	sp|Q13464|ROCK1_HUMAN	ISO-MSMS	0	16062020_SKO_IP_Cep78	1	exp_1	481.247	2	481.245	960.476	NaN	NaN	NaN	1.8728	0.00090129	NaN	NaN	NaN	NaN	NaN	15.809	0.26957	15.809	15.692	15.961	0								0	0	0	0.019707
EEFEHQQK	8	1	0	Unmodified	_EEFEHQQK_			0	0	0	sp|P11142|HSP7C_HUMAN	sp|P11142|HSP7C_HUMAN	sp|P11142|HSP7C_HUMAN	MULTI-MSMS		16062020_SKO_IP_Cep78	1	exp_1	537.747	2	537.746	1073.48	38429.1	-0.61242	-0.00032933	0.40406	0.00021728	-0.20836	-0.00011205	537.746	539.759	541.754	1.6142	0.9852	1.6142	1.1521	2.1373	0					587	105	10	0	0	0	3.6664e-143
EELAYLRK	8	1	1	Unmodified	_EELAYLRK_			0	0	1	sp|P08779|K1C16_HUMAN;CON__P08779	sp|P08779|K1C16_HUMAN	sp|P08779|K1C16_HUMAN	ISO-MSMS	0	16062020_SKO_IP_Cep78	1	exp_1	511.792	2	511.287	1020.56	NaN	NaN	NaN	0.67569	0.00034547	NaN	NaN	NaN	NaN	NaN	18.27	0.23676	18.27	18.133	18.37	0								0	0	0	0.014198
EENFFGPK	8	1	0	Unmodified	_EENFFGPK_			0	0	0	sp|Q9NZI8|IF2B1_HUMAN;sp|Q9NZI8-2|IF2B1_HUMAN	sp|Q9NZI8|IF2B1_HUMAN	sp|Q9NZI8|IF2B1_HUMAN	MULTI-MSMS		16062020_SKO_IP_Cep78	1	exp_1	484.23	2	484.23	966.445	40309.1	0.25245	0.00012224	-0.091549	-4.4331e-05	0.1609	7.7913e-05	484.229	486.242	488.237	28.244	0.44299	28.244	27.917	28.36	3.5527e-15					114	26	8	0	0	0	1.7592e-06
EERELLR	7	0	2	Unmodified	_EERELLR_			0	0	1	sp|O95232|LC7L3_HUMAN	sp|O95232|LC7L3_HUMAN	sp|O95232|LC7L3_HUMAN	ISO-MSMS	0	16062020_SKO_IP_Cep78	1	exp_1	473.263	2	472.762	943.509	NaN	NaN	NaN	0.49562	0.00023431	NaN	NaN	NaN	NaN	NaN	10.843	0.33743	10.843	10.661	10.998	0								0	0	0	7.7596e-05
EESAASGGAAYTK	13	1	0	Unmodified	_EESAASGGAAYTK_			0	0	0	sp|Q9Y2W1|TR150_HUMAN	sp|Q9Y2W1|TR150_HUMAN	sp|Q9Y2W1|TR150_HUMAN	MSMS	2	16062020_SKO_IP_Cep78	1	exp_1	625.294	2	621.286	1240.56	NaN	NaN	NaN	NaN	NaN	NaN	NaN	NaN	NaN	NaN	7.5926	1	7.5926	7.0926	8.0926	0								0	0	0	1.0149e-55
EESAASGGAAYTK	13	1	0	Unmodified	_EESAASGGAAYTK_			0	0	0	sp|Q9Y2W1|TR150_HUMAN	sp|Q9Y2W1|TR150_HUMAN	sp|Q9Y2W1|TR150_HUMAN	MSMS	0	16062020_SKO_IP_Cep78	1	exp_1	621.285	2	621.286	1240.56	NaN	NaN	NaN	NaN	NaN	NaN	NaN	NaN	NaN	NaN	7.6403	1	7.6403	7.1403	8.1403	0								0	0	0	1.662e-07
EFIQEPAK	8	1	0	Unmodified	_EFIQEPAK_			0	0	0	sp|O14744-5|ANM5_HUMAN;sp|O14744|ANM5_HUMAN;sp|O14744-3|ANM5_HUMAN;sp|O14744-2|ANM5_HUMAN;sp|O14744-4|ANM5_HUMAN	sp|O14744-5|ANM5_HUMAN	sp|O14744-5|ANM5_HUMAN	MULTI-MSMS		16062020_SKO_IP_Cep78	1	exp_1	485.261	2	481.253	960.492	39078.6	1.5924	0.00076634	-0.86019	-0.00041397	0.73219	0.00035237	481.253	483.266	485.26	18.835	0.48834	18.835	18.672	19.161	0					217	28	12	0	0	0	2.5936e-24
EGALTAFRK	9	1	1	Unmodified	_EGALTAFRK_			0	0	1	sp|Q15008-3|PSMD6_HUMAN;sp|Q15008-2|PSMD6_HUMAN;sp|Q15008|PSMD6_HUMAN;sp|Q15008-4|PSMD6_HUMAN	sp|Q15008-3|PSMD6_HUMAN	sp|Q15008-3|PSMD6_HUMAN	ISO-MSMS	0	16062020_SKO_IP_Cep78	1	exp_1	496.781	2	496.78	991.545	NaN	NaN	NaN	0.63216	0.00031404	NaN	NaN	NaN	NaN	NaN	16.77	0.25273	16.77	16.601	16.853	0								0	0	0	0.0070638
EGIVALRR	8	0	2	Unmodified	_EGIVALRR_			0	0	1	sp|P40227-2|TCPZ_HUMAN;sp|P40227|TCPZ_HUMAN	sp|P40227-2|TCPZ_HUMAN	sp|P40227-2|TCPZ_HUMAN	ISO-MSMS	0	16062020_SKO_IP_Cep78	1	exp_1	457.282	2	457.283	912.55	NaN	NaN	NaN	-1.067	-0.00048793	NaN	NaN	NaN	NaN	NaN	16.846	0.16866	16.846	16.769	16.938	-3.5527e-15								0	0	0	0.0033817
EGLELPEDEEEK	12	1	0	Unmodified	_EGLELPEDEEEK_			0	0	0	sp|P08238|HS90B_HUMAN;sp|Q58FF7|H90B3_HUMAN;sp|Q58FF6|H90B4_HUMAN;sp|P07900|HS90A_HUMAN;sp|P07900-2|HS90A_HUMAN;sp|Q58FG0|HS905_HUMAN	sp|P08238|HS90B_HUMAN;sp|P07900|HS90A_HUMAN	sp|P07900|HS90A_HUMAN	ISO-MSMS	0	16062020_SKO_IP_Cep78	1	exp_1	708.824	2	708.822	1415.63	NaN	NaN	NaN	-0.17984	-0.00012748	NaN	NaN	NaN	NaN	NaN	33.396	0.38999	33.396	33.177	33.567	0								0	0	0	0.0020249
EHELLEQQK	9	1	0	Unmodified	_EHELLEQQK_			0	0	0	sp|Q13435|SF3B2_HUMAN	sp|Q13435|SF3B2_HUMAN	sp|Q13435|SF3B2_HUMAN	MULTI-MSMS		16062020_SKO_IP_Cep78	1	exp_1	577.298	2	577.296	1152.58	37028	0.35056	0.00020238	-0.0014632	-8.4472e-07	0.3491	0.00020153	577.296	579.308	581.303	10.533	0.28663	10.533	10.374	10.661	-1.7764e-15					130	16	11	0	0	0	0
EHLLDQLK	8	1	0	Unmodified	_EHLLDQLK_			0	0	0	sp|P52732|KIF11_HUMAN	sp|P52732|KIF11_HUMAN	sp|P52732|KIF11_HUMAN	MULTI-MSMS		16062020_SKO_IP_Cep78	1	exp_1	498.28	2	498.28	994.545	39254	1.527	0.00076088	-0.30401	-0.00015148	1.223	0.0006094	498.279	500.292	502.286	25.709	0.35548	25.709	25.517	25.872	0					123	20	9	0	0	0	2.4709e-88
EHTALLK	7	1	0	Unmodified	_EHTALLK_			0	0	0	sp|P18077|RL35A_HUMAN	sp|P18077|RL35A_HUMAN	sp|P18077|RL35A_HUMAN	ISO-MSMS	0	16062020_SKO_IP_Cep78	1	exp_1	406.237	2	406.237	810.46	NaN	NaN	NaN	1.2518	0.00050852	NaN	NaN	NaN	NaN	NaN	6.9241	0.08377	6.9241	6.8697	6.9535	8.8818e-16								0	0	0	2.1359e-09
EHVIEALR	8	0	1	Unmodified	_EHVIEALR_			0	0	0	sp|P27635|RL10_HUMAN	sp|P27635|RL10_HUMAN	sp|P27635|RL10_HUMAN	ISO-MSMS	0	16062020_SKO_IP_Cep78	1	exp_1	483.773	2	483.772	965.529	NaN	NaN	NaN	0.36787	0.00017797	NaN	NaN	NaN	NaN	NaN	17.002	0.40429	17.002	16.904	17.308	0								0	0	0	6.6876e-06
EIAEAYLGK	9	1	0	Unmodified	_EIAEAYLGK_			0	0	0	sp|P11142|HSP7C_HUMAN;sp|P11142-2|HSP7C_HUMAN	sp|P11142|HSP7C_HUMAN	sp|P11142|HSP7C_HUMAN	MULTI-MSMS		16062020_SKO_IP_Cep78	1	exp_1	501.272	2	497.266	992.518	38865	0.96646	0.00048059	0.28008	0.00013927	1.2465	0.00061986	497.267	499.279	501.273	27.914	0.50634	27.914	27.715	28.221	3.5527e-15					205	29	11	0	0	0	5.9755e-13
EIEVGGGRK	9	1	1	Unmodified	_EIEVGGGRK_			0	0	1	sp|P62081|RS7_HUMAN	sp|P62081|RS7_HUMAN	sp|P62081|RS7_HUMAN	ISO-MSMS	2	16062020_SKO_IP_Cep78	1	exp_1	481.773	2	472.762	943.509	NaN	NaN	NaN	-0.53867	-0.00025466	NaN	NaN	NaN	NaN	NaN	6.2427	0.083763	6.2427	6.1841	6.2679	0								0	0	0	0.0065055
EIEVGGGRK	9	1	1	Unmodified	_EIEVGGGRK_			0	0	1	sp|P62081|RS7_HUMAN	sp|P62081|RS7_HUMAN	sp|P62081|RS7_HUMAN	ISO-MSMS	0	16062020_SKO_IP_Cep78	1	exp_1	472.761	2	472.762	943.509	NaN	NaN	NaN	-0.59013	-0.00027899	NaN	NaN	NaN	NaN	NaN	6.2427	0.083763	6.2427	6.1841	6.2679	0								0	0	0	0.0045667
EIGQSVDEVEK	11	1	0	Unmodified	_EIGQSVDEVEK_			0	0	0	sp|Q01082|SPTB2_HUMAN;sp|Q01082-2|SPTB2_HUMAN;sp|Q01082-3|SPTB2_HUMAN	sp|Q01082|SPTB2_HUMAN	sp|Q01082|SPTB2_HUMAN	MULTI-MSMS		16062020_SKO_IP_Cep78	1	exp_1	620.81	2	616.804	1231.59	35392.2	1.1599	0.00071544	0.12516	7.7196e-05	1.2851	0.00079264	616.804	619.318	620.811	18.494	0.21852	18.494	18.387	18.605	0					68	12	9	0	0	0	5.6173e-14
EIISNLAK	8	1	0	Unmodified	_EIISNLAK_			0	0	0	sp|O75533|SF3B1_HUMAN	sp|O75533|SF3B1_HUMAN	sp|O75533|SF3B1_HUMAN	ISO-MSMS	0	16062020_SKO_IP_Cep78	1	exp_1	444.265	2	444.263	886.512	NaN	NaN	NaN	-0.14836	-6.591e-05	NaN	NaN	NaN	NaN	NaN	24.124	0.44114	24.124	23.941	24.382	3.5527e-15								0	0	0	0.012257
ELEFYLRK	8	1	1	Unmodified	_ELEFYLRK_			0	0	1	sp|P62241|RS8_HUMAN	sp|P62241|RS8_HUMAN	sp|P62241|RS8_HUMAN	ISO-MSMS	2	16062020_SKO_IP_Cep78	1	exp_1	558.318	2	549.303	1096.59	NaN	NaN	NaN	1.6865	0.00092641	NaN	NaN	NaN	NaN	NaN	35.306	0.52775	35.306	35.058	35.586	0								0	0	0	0.014266
ELEFYLRK	8	1	1	Unmodified	_ELEFYLRK_			0	0	1	sp|P62241|RS8_HUMAN	sp|P62241|RS8_HUMAN	sp|P62241|RS8_HUMAN	ISO-MSMS	0	16062020_SKO_IP_Cep78	1	exp_1	549.305	2	549.303	1096.59	NaN	NaN	NaN	1.394	0.0007657	NaN	NaN	NaN	NaN	NaN	35.298	0.51088	35.298	35.075	35.586	-7.1054e-15								0	0	0	0.00593
ELESLRIQQR	10	0	2	Unmodified	_ELESLRIQQR_			0	0	1	sp|Q4VCS5-2|AMOT_HUMAN;sp|Q4VCS5|AMOT_HUMAN	sp|Q4VCS5-2|AMOT_HUMAN	sp|Q4VCS5-2|AMOT_HUMAN	ISO-MSMS	1	16062020_SKO_IP_Cep78	1	exp_1	642.377	2	636.357	1270.7	NaN	NaN	NaN	0.18149	0.00011549	NaN	NaN	NaN	NaN	NaN	22.18	0.32374	22.18	22.021	22.345	0								0	0	0	4.6703e-12
ELESLRIQQR	10	0	2	Unmodified	_ELESLRIQQR_			0	0	1	sp|Q4VCS5-2|AMOT_HUMAN;sp|Q4VCS5|AMOT_HUMAN	sp|Q4VCS5-2|AMOT_HUMAN	sp|Q4VCS5-2|AMOT_HUMAN	ISO-MSMS	0	16062020_SKO_IP_Cep78	1	exp_1	636.357	2	636.357	1270.7	NaN	NaN	NaN	-1.3614	-0.00086635	NaN	NaN	NaN	NaN	NaN	22.206	0.31306	22.206	22.049	22.362	0								0	0	0	0.0031193
ELLTLDEK	8	1	0	Unmodified	_ELLTLDEK_			0	0	0	sp|P46781|RS9_HUMAN	sp|P46781|RS9_HUMAN	sp|P46781|RS9_HUMAN	ISO-MSMS	2	16062020_SKO_IP_Cep78	1	exp_1	484.775	2	480.766	959.518	NaN	NaN	NaN	0.14904	7.1656e-05	NaN	NaN	NaN	NaN	NaN	33.777	0.57863	33.777	33.567	34.146	0								0	0	0	0.024418
ELNITAAK	8	1	0	Unmodified	_ELNITAAK_			0	0	0	sp|P62081|RS7_HUMAN	sp|P62081|RS7_HUMAN	sp|P62081|RS7_HUMAN	MULTI-MSMS		16062020_SKO_IP_Cep78	1	exp_1	434.257	2	430.248	858.481	42254	1.5038	0.000647	0.44248	0.00019038	1.9463	0.00083738	430.248	432.26	434.255	18.295	0.30399	18.295	18.133	18.437	0					104	17	9	0	0	0	3.7705e-10
ENQQATSGPNQPSVR	15	0	1	Unmodified	_ENQQATSGPNQPSVR_			0	0	0	sp|P16989-2|YBOX3_HUMAN;sp|P16989-3|YBOX3_HUMAN;sp|P16989|YBOX3_HUMAN	sp|P16989-2|YBOX3_HUMAN	sp|P16989-2|YBOX3_HUMAN	ISO-MSMS	0	16062020_SKO_IP_Cep78	1	exp_1	807.39	2	806.887	1611.76	NaN	NaN	NaN	0.23374	0.0001886	NaN	NaN	NaN	NaN	NaN	10.585	0.32091	10.585	10.374	10.695	0								0	0	0	6.5431e-126
ENQQATSGPNQPSVR	15	0	1	Unmodified	_ENQQATSGPNQPSVR_			0	0	0	sp|P16989-2|YBOX3_HUMAN;sp|P16989-3|YBOX3_HUMAN;sp|P16989|YBOX3_HUMAN	sp|P16989-2|YBOX3_HUMAN	sp|P16989-2|YBOX3_HUMAN	ISO-MSMS	2	16062020_SKO_IP_Cep78	1	exp_1	811.893	2	806.887	1611.76	NaN	NaN	NaN	0.60568	0.00048871	NaN	NaN	NaN	NaN	NaN	10.572	0.16849	10.572	10.475	10.644	1.7764e-15								0	0	0	5.5978e-08
EQTFSGGTSQDTK	13	1	0	Unmodified	_EQTFSGGTSQDTK_			0	0	0	sp|Q9Y2W1|TR150_HUMAN	sp|Q9Y2W1|TR150_HUMAN	sp|Q9Y2W1|TR150_HUMAN	ISO-MSMS	2	16062020_SKO_IP_Cep78	1	exp_1	697.32	2	693.313	1384.61	NaN	NaN	NaN	-0.55923	-0.00038772	NaN	NaN	NaN	NaN	NaN	9.2638	0.51723	9.2638	8.9146	9.4318	0								0	0	0	1.2376e-06
EQTFSGGTSQDTK	13	1	0	Unmodified	_EQTFSGGTSQDTK_			0	0	0	sp|Q9Y2W1|TR150_HUMAN	sp|Q9Y2W1|TR150_HUMAN	sp|Q9Y2W1|TR150_HUMAN	ISO-MSMS	0	16062020_SKO_IP_Cep78	1	exp_1	693.814	2	693.313	1384.61	NaN	NaN	NaN	-0.14241	-9.8737e-05	NaN	NaN	NaN	NaN	NaN	9.2531	0.50677	9.2531	8.9251	9.4318	0								0	0	0	0.00011221
EQVANSAFVER	11	0	1	Unmodified	_EQVANSAFVER_			0	0	0	sp|P08238|HS90B_HUMAN;sp|Q58FF7|H90B3_HUMAN	sp|P08238|HS90B_HUMAN	sp|P08238|HS90B_HUMAN	ISO-MSMS	0	16062020_SKO_IP_Cep78	1	exp_1	625.315	2	625.312	1248.61	NaN	NaN	NaN	1.9959	0.001248	NaN	NaN	NaN	NaN	NaN	20.491	0.32067	20.491	20.34	20.661	3.5527e-15								0	0	0	0.0024387
EREAELGAR	9	0	2	Unmodified	_EREAELGAR_			0	0	1	sp|P11940-2|PABP1_HUMAN;sp|P11940|PABP1_HUMAN;sp|Q9H361|PABP3_HUMAN;sp|Q4VXU2|PAP1L_HUMAN;sp|Q4VXU2-2|PAP1L_HUMAN	sp|P11940-2|PABP1_HUMAN	sp|P11940-2|PABP1_HUMAN	ISO-MSMS	0	16062020_SKO_IP_Cep78	1	exp_1	515.768	2	515.767	1029.52	NaN	NaN	NaN	1.5725	0.00081107	NaN	NaN	NaN	NaN	NaN	6.3923	0.18428	6.3923	6.2846	6.4689	0								0	0	0	0.021839
ERSGVSLAALK	11	1	1	Unmodified	_ERSGVSLAALK_			0	0	1	sp|P16403|H12_HUMAN;sp|P10412|H14_HUMAN;sp|P16402|H13_HUMAN	sp|P16403|H12_HUMAN	sp|P16403|H12_HUMAN	MULTI-MSMS		16062020_SKO_IP_Cep78	1	exp_1	565.832	2	565.83	1129.65	37407.2	0.75665	0.00042813	-0.21705	-0.00012282	0.53959	0.00030532	565.83	570.855	574.841	20.751	0.18463	20.751	20.627	20.812	0					65	10	9	0	0	0	5.2242e-67
ERTNEGVIEFR	11	0	2	Unmodified	_ERTNEGVIEFR_			0	0	1	sp|Q13247-3|SRSF6_HUMAN;sp|Q13247|SRSF6_HUMAN	sp|Q13247-3|SRSF6_HUMAN	sp|Q13247-3|SRSF6_HUMAN	ISO-MSMS	0	16062020_SKO_IP_Cep78	1	exp_1	675.345	2	675.344	1348.67	NaN	NaN	NaN	0.18182	0.00012279	NaN	NaN	NaN	NaN	NaN	22.985	0.25219	22.985	22.862	23.115	0								0	0	0	0.0088392
ERTNEGVIEFR	11	0	2	Unmodified	_ERTNEGVIEFR_			0	0	1	sp|Q13247-3|SRSF6_HUMAN;sp|Q13247|SRSF6_HUMAN	sp|Q13247-3|SRSF6_HUMAN	sp|Q13247-3|SRSF6_HUMAN	ISO-MSMS	2	16062020_SKO_IP_Cep78	1	exp_1	685.353	2	675.344	1348.67	NaN	NaN	NaN	0.32954	0.00022256	NaN	NaN	NaN	NaN	NaN	23.007	0.21902	23.007	22.862	23.081	3.5527e-15								0	0	0	0.0060038
ESEFDDEPK	9	1	0	Unmodified	_ESEFDDEPK_			0	0	0	sp|Q9Y2W1|TR150_HUMAN	sp|Q9Y2W1|TR150_HUMAN	sp|Q9Y2W1|TR150_HUMAN	MULTI-MSMS		16062020_SKO_IP_Cep78	1	exp_1	548.228	2	548.227	1094.44	38570.8	-0.88005	-0.00048247	-0.32201	-0.00017654	-1.2021	-0.000659	548.227	550.24	552.235	14.935	0.59091	14.935	14.713	15.304	1.7764e-15					169	36	8	0	0	0	1.2491e-12
ESFDGSVR	8	0	1	Unmodified	_ESFDGSVR_			0	0	0	sp|P19338|NUCL_HUMAN	sp|P19338|NUCL_HUMAN	sp|P19338|NUCL_HUMAN	MULTI-MSMS		16062020_SKO_IP_Cep78	1	exp_1	448.707	2	448.709	895.404	40631.3	1.0237	0.00045933	-0.49959	-0.00022417	0.52408	0.00023516	448.709	451.72	453.713	14.398	0.38588	14.398	14.161	14.547	1.7764e-15					111	22	9	0	0	0	4.7202e-45
ETAEAYLGK	9	1	0	Unmodified	_ETAEAYLGK_			0	0	0	sp|P11021|GRP78_HUMAN	sp|P11021|GRP78_HUMAN	sp|P11021|GRP78_HUMAN	MULTI-MSMS		16062020_SKO_IP_Cep78	1	exp_1	495.254	2	491.248	980.481	38785.3	1.2295	0.00060399	0.098279	4.8279e-05	1.3278	0.00065227	491.248	493.261	495.254	18.751	0.42105	18.751	18.521	18.942	0					109	24	10	0	0	0	0.0029831
ETEFLRLK	8	1	1	Unmodified	_ETEFLRLK_			0	0	1	sp|Q15208|STK38_HUMAN;sp|Q9Y2H1|ST38L_HUMAN	sp|Q15208|STK38_HUMAN;sp|Q9Y2H1|ST38L_HUMAN	sp|Q9Y2H1|ST38L_HUMAN	ISO-MSMS	0	16062020_SKO_IP_Cep78	1	exp_1	518.295	2	518.295	1034.58	NaN	NaN	NaN	2.3544	0.0012203	NaN	NaN	NaN	NaN	NaN	29.742	0.28134	29.742	29.599	29.88	0								0	0	0	0.0015799
ETGYVVERPSTTK	13	1	1	Unmodified	_ETGYVVERPSTTK_			0	0	1	sp|Q9NYF8-3|BCLF1_HUMAN;sp|Q9NYF8-2|BCLF1_HUMAN;sp|Q9NYF8|BCLF1_HUMAN	sp|Q9NYF8-3|BCLF1_HUMAN	sp|Q9NYF8-3|BCLF1_HUMAN	ISO-MSMS	0	16062020_SKO_IP_Cep78	1	exp_1	734.379	2	733.878	1465.74	NaN	NaN	NaN	-0.698	-0.00051225	NaN	NaN	NaN	NaN	NaN	15.13	0.33377	15.13	14.915	15.249	0								0	0	0	5.2158e-217
ETGYVVERPSTTK	13	1	1	Unmodified	_ETGYVVERPSTTK_			0	0	1	sp|Q9NYF8-3|BCLF1_HUMAN;sp|Q9NYF8-2|BCLF1_HUMAN;sp|Q9NYF8|BCLF1_HUMAN	sp|Q9NYF8-3|BCLF1_HUMAN	sp|Q9NYF8-3|BCLF1_HUMAN	ISO-MSMS	2	16062020_SKO_IP_Cep78	1	exp_1	742.89	2	733.878	1465.74	NaN	NaN	NaN	-1.0862	-0.00079714	NaN	NaN	NaN	NaN	NaN	15.109	0.30309	15.109	14.932	15.235	-1.7764e-15								0	0	0	4.7119e-106
EVPAVPETLK	10	1	0	Unmodified	_EVPAVPETLK_			0	0	0	sp|P18124|RL7_HUMAN	sp|P18124|RL7_HUMAN	sp|P18124|RL7_HUMAN	MULTI-MSMS		16062020_SKO_IP_Cep78	1	exp_1	545.818	2	541.808	1081.6	38288	1.9284	0.0010448	1.8161	0.00098398	3.7445	0.0020288	541.809	543.821	545.817	32.389	0.32359	32.389	32.22	32.544	0					107	18	9	0	0	0	0.014549
EVQVEHIK	8	1	0	Unmodified	_EVQVEHIK_			0	0	0	sp|Q96DG6|CMBL_HUMAN	sp|Q96DG6|CMBL_HUMAN	sp|Q96DG6|CMBL_HUMAN	MULTI-MSMS		16062020_SKO_IP_Cep78	1	exp_1	491.272	2	491.272	980.529	40065.3	0.14347	7.0481e-05	0.085377	4.1943e-05	0.22884	0.00011242	491.272	493.284	495.279	10.272	0.21857	10.272	10.155	10.374	0					69	12	7	0	0	0	9.3443e-72
EVSTYIK	7	1	0	Unmodified	_EVSTYIK_			0	0	0	sp|Q5VTE0|EF1A3_HUMAN;sp|P68104|EF1A1_HUMAN;sp|P68104-2|EF1A1_HUMAN	sp|Q5VTE0|EF1A3_HUMAN	sp|Q5VTE0|EF1A3_HUMAN	MULTI-MSMS		16062020_SKO_IP_Cep78	1	exp_1	420.229	2	420.229	838.444	42929.8	0.42042	0.00017667	0.11555	4.8557e-05	0.53597	0.00022523	420.229	422.241	424.237	16.295	0.52187	16.295	16.062	16.584	0					130	30	9	0	0	0	0.0035438
EYSGFAGVSRPR	12	0	2	Unmodified	_EYSGFAGVSRPR_			0	0	1	sp|Q9NYF8-3|BCLF1_HUMAN;sp|Q9NYF8-2|BCLF1_HUMAN;sp|Q9NYF8|BCLF1_HUMAN;sp|Q9NYF8-4|BCLF1_HUMAN	sp|Q9NYF8-3|BCLF1_HUMAN	sp|Q9NYF8-3|BCLF1_HUMAN	MULTI-MSMS		16062020_SKO_IP_Cep78	1	exp_1	673.343	2	663.333	1324.65	34321.4	0.76118	0.00050491	0.61005	0.00040467	1.3712	0.00090958	663.333	669.353	673.342	20.439	0.20268	20.439	20.323	20.526	0					55	11	7	0	0	0	1.4339e-08
EYTEEIER	8	0	1	Unmodified	_EYTEEIER_			0	0	0	sp|P52732|KIF11_HUMAN	sp|P52732|KIF11_HUMAN	sp|P52732|KIF11_HUMAN	MULTI-MSMS		16062020_SKO_IP_Cep78	1	exp_1	534.747	2	534.746	1067.48	38313.9	1.2094	0.00064674	-1.1715	-0.00062644	0.037958	2.0298e-05	534.745	537.754	539.749	16.976	0.26957	16.976	16.853	17.123	0					110	15	11	0	0	0	2.6935e-06
EYTINIHK	8	1	0	Unmodified	_EYTINIHK_			0	0	0	sp|P62899-3|RL31_HUMAN;sp|P62899|RL31_HUMAN;sp|P62899-2|RL31_HUMAN	sp|P62899-3|RL31_HUMAN	sp|P62899-3|RL31_HUMAN	MULTI-MSMS		16062020_SKO_IP_Cep78	1	exp_1	513.279	2	509.272	1016.53	38688.1	1.5643	0.00079666	-6.0319	-0.0030719	-4.4676	-0.0022752	509.272	511.783	513.274	18.472	0.75845	18.472	18.133	18.892	0					304	42	13	0	0	0	1.7822e-06
FAVAALQSK	9	1	0	Unmodified	_FAVAALQSK_			0	0	0	sp|Q5W0B1|RN219_HUMAN	sp|Q5W0B1|RN219_HUMAN	sp|Q5W0B1|RN219_HUMAN	MULTI-MSMS		16062020_SKO_IP_Cep78	1	exp_1	467.771	2	467.771	933.528	42363	0.090697	4.2425e-05	-0.9691	-0.00045332	-0.8784	-0.00041089	467.771	469.783	471.779	29.142	0.27158	29.142	29.006	29.277	0					165	38	7	0	0	0	4.3655e-37
FDDAVVQSDMK	11	1	0	Oxidation (M)	_FDDAVVQSDM(ox)K_	FDDAVVQSDM(1)K	FDDAVVQSDM(131.52)K	0	1	0	sp|P11142|HSP7C_HUMAN;sp|P11142-2|HSP7C_HUMAN	sp|P11142|HSP7C_HUMAN	sp|P11142|HSP7C_HUMAN	MULTI-MSMS		16062020_SKO_IP_Cep78	1	exp_1	635.783	2	635.785	1269.55	34499.1	1.4651	0.00093147	-0.61571	-0.00039146	0.84936	0.00054001	635.784	638.298	639.792	19.705	0.35434	19.705	19.531	19.886	0					100	20	9	0	0	0	5.4892e-41
FEMEQNLR	8	0	1	Oxidation (M)	_FEM(ox)EQNLR_	FEM(1)EQNLR	FEM(114.78)EQNLR	0	1	0	sp|P35527|K1C9_HUMAN;CON__P35527	sp|P35527|K1C9_HUMAN	sp|P35527|K1C9_HUMAN	ISO-MSMS	0	16062020_SKO_IP_Cep78	1	exp_1	541.753	2	541.75	1081.49	NaN	NaN	NaN	0.62705	0.0003397	NaN	NaN	NaN	NaN	NaN	14.505	0.23471	14.505	14.429	14.664	0								0	0	0	0.0044169
FEPPQSDSDGQRR	13	0	2	Unmodified	_FEPPQSDSDGQRR_			0	0	1	sp|O15042-2|SR140_HUMAN;sp|O15042|SR140_HUMAN	sp|O15042-2|SR140_HUMAN	sp|O15042-2|SR140_HUMAN	MSMS	0	16062020_SKO_IP_Cep78	1	exp_1	759.817	2	759.85	1517.69	NaN	NaN	NaN	NaN	NaN	NaN	NaN	NaN	NaN	NaN	12.108	1	12.108	11.608	12.608	0								0	0	0	0.025746
FESPEVAER	9	0	1	Unmodified	_FESPEVAER_			0	0	0	sp|P52272-2|HNRPM_HUMAN;sp|P52272|HNRPM_HUMAN	sp|P52272-2|HNRPM_HUMAN	sp|P52272-2|HNRPM_HUMAN	ISO-MSMS	0	16062020_SKO_IP_Cep78	1	exp_1	532.257	2	532.256	1062.5	NaN	NaN	NaN	-1.3057	-0.00069498	NaN	NaN	NaN	NaN	NaN	19.042	0.69005	19.042	18.656	19.346	-3.5527e-15								0	0	0	0.015563
FGDPVVQSDMK	11	1	0	Oxidation (M)	_FGDPVVQSDM(ox)K_	FGDPVVQSDM(1)K	FGDPVVQSDM(103.42)K	0	1	0	sp|P0DMV9|HS71B_HUMAN;sp|P0DMV8|HS71A_HUMAN;sp|P0DMV8-2|HS71A_HUMAN	sp|P0DMV9|HS71B_HUMAN	sp|P0DMV9|HS71B_HUMAN	MULTI-MSMS		16062020_SKO_IP_Cep78	1	exp_1	619.79	2	619.79	1237.56	35082.3	0.30082	0.00018645	1.4547	0.0009016	1.7555	0.001088	619.791	621.803	623.797	20.437	0.33775	20.437	20.256	20.594	0					146	19	10	0	0	0	2.3576e-14
FGPLASVK	8	1	0	Unmodified	_FGPLASVK_			0	0	0	sp|O15042-2|SR140_HUMAN;sp|O15042|SR140_HUMAN	sp|O15042-2|SR140_HUMAN	sp|O15042-2|SR140_HUMAN	MULTI-MSMS		16062020_SKO_IP_Cep78	1	exp_1	409.743	2	409.742	817.47	43676.9	0.78653	0.00032227	0.04176	1.7111e-05	0.82829	0.00033939	409.742	411.755	413.749	28.122	0.37132	28.122	27.883	28.255	0					133	21	9	0	0	0	0.011018
FHHTIGGSR	9	0	1	Unmodified	_FHHTIGGSR_			0	0	0	sp|P61313|RL15_HUMAN	sp|P61313|RL15_HUMAN	sp|P61313|RL15_HUMAN	MSMS	0	16062020_SKO_IP_Cep78	1	exp_1	506.258	2	506.26	1010.5	NaN	NaN	NaN	NaN	NaN	NaN	NaN	NaN	NaN	NaN	2.3219	1	2.3219	1.8219	2.8219	0								0	0	0	0.0052235
FIDTTSK	7	1	0	Unmodified	_FIDTTSK_			0	0	0	sp|P39023|RL3_HUMAN;sp|Q92901|RL3L_HUMAN	sp|P39023|RL3_HUMAN	sp|P39023|RL3_HUMAN	ISO-MSMS	0	16062020_SKO_IP_Cep78	1	exp_1	406.213	2	406.213	810.412	NaN	NaN	NaN	-0.38391	-0.00015595	NaN	NaN	NaN	NaN	NaN	10.683	0.62443	10.683	10.442	11.066	0								0	0	0	0.025114
FIEIAARK	8	1	1	Unmodified	_FIEIAARK_			0	0	1	sp|Q00839-2|HNRPU_HUMAN;sp|Q00839|HNRPU_HUMAN	sp|Q00839-2|HNRPU_HUMAN	sp|Q00839-2|HNRPU_HUMAN	MULTI-SECPEP		16062020_SKO_IP_Cep78	1	exp_1	482.773	2	474.287	946.56	40726.1	1.9278	0.00091431	-0.22212	-0.00010535	1.7056	0.00080896	474.287	479.31	483.298	18.411	0.23604	18.411	18.285	18.521	-3.5527e-15					80	13	8	0	0	0	0.024315
FLEQQNQVLQTK	12	1	0	Unmodified	_FLEQQNQVLQTK_			0	0	0	sp|P04264|K2C1_HUMAN;CON__P04264;CON__Q6IFZ6;sp|Q7Z794|K2C1B_HUMAN;CON__Q7Z794;CON__Q9R0H5;CON__Q6NXH9;sp|P35908|K22E_HUMAN;CON__P35908v2;CON__P35908	sp|P04264|K2C1_HUMAN;sp|P35908|K22E_HUMAN	sp|P04264|K2C1_HUMAN	ISO-MSMS	0	16062020_SKO_IP_Cep78	1	exp_1	738.898	2	738.396	1474.78	NaN	NaN	NaN	0.59372	0.0004384	NaN	NaN	NaN	NaN	NaN	30.679	0.28825	30.679	30.538	30.826	-3.5527e-15								0	0	0	0.0012101
FLVHNVK	7	1	0	Unmodified	_FLVHNVK_			0	0	0	sp|P62910|RL32_HUMAN	sp|P62910|RL32_HUMAN	sp|P62910|RL32_HUMAN	MULTI-MSMS		16062020_SKO_IP_Cep78	1	exp_1	432.763	2	428.756	855.497	42292.6	1.254	0.00053766	-0.91607	-0.00039277	0.33792	0.00014488	428.755	430.768	432.762	13.374	0.38606	13.374	13.204	13.59	1.7764e-15					126	22	10	0	0	0	1.2184e-42
FQDELESGK	9	1	0	Unmodified	_FQDELESGK_			0	0	0	sp|O15042-2|SR140_HUMAN;sp|O15042|SR140_HUMAN;sp|O15042-3|SR140_HUMAN	sp|O15042-2|SR140_HUMAN	sp|O15042-2|SR140_HUMAN	MULTI-MSMS		16062020_SKO_IP_Cep78	1	exp_1	530.757	2	526.748	1051.48	38210	1.8732	0.00098672	2.1692	0.0011426	4.0424	0.0021293	526.75	528.762	530.756	17.399	0.38851	17.399	17.241	17.629	0					189	22	11	0	0	0	9.3296e-13
FQNALLVR	8	0	1	Unmodified	_FQNALLVR_			0	0	0	sp|P02768|ALBU_HUMAN;CON__P02768-1;sp|P02768-3|ALBU_HUMAN;sp|P02768-2|ALBU_HUMAN	sp|P02768|ALBU_HUMAN	sp|P02768|ALBU_HUMAN	ISO-MSMS	0	16062020_SKO_IP_Cep78	1	exp_1	480.786	2	480.785	959.555	NaN	NaN	NaN	1.3506	0.00064937	NaN	NaN	NaN	NaN	NaN	32.467	0.27213	32.467	32.356	32.629	0								0	0	0	0.022117
FQTMEEK	7	1	0	Oxidation (M)	_FQTM(ox)EEK_	FQTM(1)EEK	FQTM(101.64)EEK	0	1	0	sp|P39023|RL3_HUMAN	sp|P39023|RL3_HUMAN	sp|P39023|RL3_HUMAN	ISO-MSMS	2	16062020_SKO_IP_Cep78	1	exp_1	468.715	2	464.708	927.401	NaN	NaN	NaN	-0.086013	-3.9971e-05	NaN	NaN	NaN	NaN	NaN	6.2609	0.134	6.2609	6.2009	6.3349	0								0	0	0	0.023703
FQTMEEK	7	1	0	Oxidation (M)	_FQTM(ox)EEK_	FQTM(1)EEK	FQTM(97.6)EEK	0	1	0	sp|P39023|RL3_HUMAN	sp|P39023|RL3_HUMAN	sp|P39023|RL3_HUMAN	ISO-MSMS	0	16062020_SKO_IP_Cep78	1	exp_1	464.707	2	464.708	927.401	NaN	NaN	NaN	0.13761	6.3948e-05	NaN	NaN	NaN	NaN	NaN	6.2672	0.15075	6.2672	6.2009	6.3516	8.8818e-16								0	0	0	0.025507
FQTMEEK	7	1	0	Unmodified	_FQTMEEK_			0	0	0	sp|P39023|RL3_HUMAN	sp|P39023|RL3_HUMAN	sp|P39023|RL3_HUMAN	MULTI-SECPEP		16062020_SKO_IP_Cep78	1	exp_1	456.711	2	456.71	911.406	41626.3	1.8422	0.00084136	-1.6252	-0.00074227	0.21698	9.9095e-05	456.71	458.721	460.717	15.373	0.2592	15.373	15.264	15.523	0					81	15	8	0	0	0	0.017595
FSELTAEK	8	1	0	Unmodified	_FSELTAEK_			0	0	0	sp|P48643|TCPE_HUMAN;sp|P48643-2|TCPE_HUMAN	sp|P48643|TCPE_HUMAN	sp|P48643|TCPE_HUMAN	ISO-MSMS	0	16062020_SKO_IP_Cep78	1	exp_1	462.738	2	462.737	923.46	NaN	NaN	NaN	-0.36609	-0.0001694	NaN	NaN	NaN	NaN	NaN	16.845	0.20235	16.845	16.735	16.938	0								0	0	0	0.010035
FSGSGSGTDFTLK	13	1	0	Unmodified	_FSGSGSGTDFTLK_			0	0	0	sp|A2NJV5|KV229_HUMAN;sp|A0A0A0MRZ7|KVD26_HUMAN;sp|A0A075B6S2|KVD29_HUMAN;sp|P06310|KV230_HUMAN;sp|P01615|KVD28_HUMAN;sp|A0A075B6S6|KVD30_HUMAN;sp|A0A075B6P5|KV228_HUMAN;sp|P01614|KVD40_HUMAN;sp|A0A087WW87|KV240_HUMAN	sp|A2NJV5|KV229_HUMAN	sp|A2NJV5|KV229_HUMAN	ISO-MSMS	0	16062020_SKO_IP_Cep78	1	exp_1	652.312	2	652.312	1302.61	NaN	NaN	NaN	-1.1178	-0.00072913	NaN	NaN	NaN	NaN	NaN	20.752	0.10072	20.752	20.678	20.778	3.5527e-15								0	0	0	0.00010492
FSSSSGYGGGSSR	13	0	1	Unmodified	_FSSSSGYGGGSSR_			0	0	0	sp|P35527|K1C9_HUMAN;CON__P35527	sp|P35527|K1C9_HUMAN	sp|P35527|K1C9_HUMAN	ISO-MSMS	0	16062020_SKO_IP_Cep78	1	exp_1	618.269	2	618.268	1234.52	NaN	NaN	NaN	0.4288	0.00026511	NaN	NaN	NaN	NaN	NaN	9.1307	0.38175	9.1307	8.9361	9.3179	1.7764e-15								0	0	0	5.6136e-13
FVIATSTK	8	1	0	Unmodified	_FVIATSTK_			0	0	0	sp|Q02878|RL6_HUMAN	sp|Q02878|RL6_HUMAN	sp|Q02878|RL6_HUMAN	MULTI-MSMS		16062020_SKO_IP_Cep78	1	exp_1	433.753	2	433.753	865.491	41567.3	0.42521	0.00018444	1.2819	0.00055602	1.7071	0.00074045	433.753	435.766	437.761	20.332	0.25326	20.332	20.189	20.442	-3.5527e-15					108	14	10	0	0	0	2.6974e-16
FYEEVHDLER	10	0	1	Unmodified	_FYEEVHDLER_			0	0	0	sp|Q99733|NP1L4_HUMAN;sp|Q99733-2|NP1L4_HUMAN;sp|P55209-3|NP1L1_HUMAN;sp|P55209-2|NP1L1_HUMAN;sp|P55209|NP1L1_HUMAN	sp|Q99733|NP1L4_HUMAN	sp|Q99733|NP1L4_HUMAN	ISO-MSMS	0	16062020_SKO_IP_Cep78	1	exp_1	669.316	2	668.812	1335.61	NaN	NaN	NaN	-0.18711	-0.00012514	NaN	NaN	NaN	NaN	NaN	27.883	0.28708	27.883	27.732	28.019	-3.5527e-15								0	0	0	0.013989
FYEEVHDLER	10	0	1	Unmodified	_FYEEVHDLER_			0	0	0	sp|Q99733|NP1L4_HUMAN;sp|Q99733-2|NP1L4_HUMAN;sp|P55209-3|NP1L1_HUMAN;sp|P55209-2|NP1L1_HUMAN;sp|P55209|NP1L1_HUMAN	sp|Q99733|NP1L4_HUMAN	sp|Q99733|NP1L4_HUMAN	ISO-MSMS	2	16062020_SKO_IP_Cep78	1	exp_1	673.816	2	668.812	1335.61	NaN	NaN	NaN	-0.5779	-0.00038651	NaN	NaN	NaN	NaN	NaN	27.886	0.25345	27.886	27.748	28.002	0								0	0	0	0.016706
FYEEVHDLERK	11	1	1	Unmodified	_FYEEVHDLERK_			0	0	1	sp|Q99733|NP1L4_HUMAN;sp|Q99733-2|NP1L4_HUMAN;sp|P55209-3|NP1L1_HUMAN;sp|P55209-2|NP1L1_HUMAN;sp|P55209|NP1L1_HUMAN	sp|Q99733|NP1L4_HUMAN	sp|Q99733|NP1L4_HUMAN	ISO-MSMS	0	16062020_SKO_IP_Cep78	1	exp_1	733.359	2	732.86	1463.7	NaN	NaN	NaN	-0.18169	-0.00013315	NaN	NaN	NaN	NaN	NaN	21.206	0.27875	21.206	21.084	21.362	0								0	0	0	2.0617e-29
FYEQFSK	7	1	0	Unmodified	_FYEQFSK_			0	0	0	sp|P07900|HS90A_HUMAN;sp|P07900-2|HS90A_HUMAN	sp|P07900|HS90A_HUMAN	sp|P07900|HS90A_HUMAN	ISO-MSMS	0	16062020_SKO_IP_Cep78	1	exp_1	474.773	2	474.727	947.439	NaN	NaN	NaN	-0.31412	-0.00014912	NaN	NaN	NaN	NaN	NaN	21.422	0.31417	21.422	21.305	21.62	0								0	0	0	0.021005
FYESGSSLR	9	0	1	Unmodified	_FYESGSSLR_			0	0	0	sp|Q7Z353-2|HDX_HUMAN;sp|Q7Z353|HDX_HUMAN	sp|Q7Z353-2|HDX_HUMAN	sp|Q7Z353-2|HDX_HUMAN	MULTI-MSMS		16062020_SKO_IP_Cep78	1	exp_1	523.252	2	523.251	1044.49	39488.9	1.9646	0.001028	0.46375	0.00024266	2.4284	0.0012706	523.252	526.262	528.757	17.649	0.2358	17.649	17.511	17.747	0					49	13	6	0	0	0	0.0083477
GAEAANVTGPDGVPVEGSR	19	0	1	Unmodified	_GAEAANVTGPDGVPVEGSR_			0	0	0	sp|P16989-2|YBOX3_HUMAN;sp|P16989-3|YBOX3_HUMAN;sp|P16989|YBOX3_HUMAN	sp|P16989-2|YBOX3_HUMAN	sp|P16989-2|YBOX3_HUMAN	MSMS	0	16062020_SKO_IP_Cep78	1	exp_1	891.936	2	891.934	1781.85	NaN	NaN	NaN	NaN	NaN	NaN	NaN	NaN	NaN	NaN	27.665	1	27.665	27.165	28.165	0								0	0	0	8.608e-12
GAEAANVTGPGGVPVQGSK	19	1	0	Unmodified	_GAEAANVTGPGGVPVQGSK_			0	0	0	sp|P67809|YBOX1_HUMAN	sp|P67809|YBOX1_HUMAN	sp|P67809|YBOX1_HUMAN	ISO-MSMS	0	16062020_SKO_IP_Cep78	1	exp_1	848.435	2	848.437	1694.86	NaN	NaN	NaN	-0.23752	-0.00020152	NaN	NaN	NaN	NaN	NaN	22.772	0.30371	22.772	22.643	22.947	0								0	0	0	1.4834e-63
GAEAANVTGPGGVPVQGSK	19	1	0	Unmodified	_GAEAANVTGPGGVPVQGSK_			0	0	0	sp|P67809|YBOX1_HUMAN	sp|P67809|YBOX1_HUMAN	sp|P67809|YBOX1_HUMAN	ISO-MSMS	2	16062020_SKO_IP_Cep78	1	exp_1	852.95	2	848.437	1694.86	NaN	NaN	NaN	0.54654	0.0004637	NaN	NaN	NaN	NaN	NaN	22.775	0.23581	22.775	22.627	22.862	0								0	0	0	4.2955e-91
GFPVLSK	7	1	0	Unmodified	_GFPVLSK_			0	0	0	sp|O14744-5|ANM5_HUMAN;sp|O14744|ANM5_HUMAN;sp|O14744-3|ANM5_HUMAN;sp|O14744-2|ANM5_HUMAN	sp|O14744-5|ANM5_HUMAN	sp|O14744-5|ANM5_HUMAN	MULTI-SECPEP		16062020_SKO_IP_Cep78	1	exp_1	378.208	2	374.224	746.433	45428.1	1.2563	0.00047013	0.23615	8.8374e-05	1.4924	0.0005585	374.224	376.236	378.231	30.357	0.65894	30.357	29.981	30.64	0					237	38	8	0	0	0	2.4256e-05
GFVVINQK	8	1	0	Unmodified	_GFVVINQK_			0	0	0	sp|P40227-2|TCPZ_HUMAN;sp|P40227|TCPZ_HUMAN;sp|Q92526-2|TCPW_HUMAN;sp|Q92526-3|TCPW_HUMAN;sp|Q92526|TCPW_HUMAN	sp|P40227-2|TCPZ_HUMAN	sp|P40227-2|TCPZ_HUMAN	ISO-MSMS	0	16062020_SKO_IP_Cep78	1	exp_1	452.767	2	452.766	903.518	NaN	NaN	NaN	-0.12583	-5.6974e-05	NaN	NaN	NaN	NaN	NaN	25.717	0.27037	25.717	25.534	25.804	0								0	0	0	0.0099865
GGSGGGGSISGGGYGSGGGSGGR	23	0	1	Unmodified	_GGSGGGGSISGGGYGSGGGSGGR_			0	0	0	sp|P35908|K22E_HUMAN;CON__P35908v2;CON__P35908	sp|P35908|K22E_HUMAN	sp|P35908|K22E_HUMAN	ISO-MSMS	0	16062020_SKO_IP_Cep78	1	exp_1	871.878	2	871.378	1740.74	NaN	NaN	NaN	0.1787	0.00015572	NaN	NaN	NaN	NaN	NaN	10.46	0.20203	10.46	10.374	10.576	-1.7764e-15								0	0	0	0
GGSGGSYGGGGSGGGYGGGSGSR	23	0	1	Unmodified	_GGSGGSYGGGGSGGGYGGGSGSR_			0	0	0	sp|P35527|K1C9_HUMAN;CON__P35527	sp|P35527|K1C9_HUMAN	sp|P35527|K1C9_HUMAN	ISO-MSMS	0	16062020_SKO_IP_Cep78	1	exp_1	896.87	2	896.367	1790.72	NaN	NaN	NaN	0.894	0.00080135	NaN	NaN	NaN	NaN	NaN	7.9261	0.17628	7.9261	7.8391	8.0154	0								0	0	0	0
GHFLLSSK	8	1	0	Unmodified	_GHFLLSSK_			0	0	0	sp|P19474|RO52_HUMAN;sp|P19474-2|RO52_HUMAN	sp|P19474|RO52_HUMAN	sp|P19474|RO52_HUMAN	MULTI-MSMS		16062020_SKO_IP_Cep78	1	exp_1	448.758	2	444.751	887.487	41953	0.51411	0.00022865	-0.64216	-0.0002856	-0.12804	-5.6948e-05	444.75	446.761	448.758	16.33	0.23574	16.33	16.23	16.466	0					55	13	7	0	0	0	4.4874e-45
GHLENNPALEK	11	1	0	Unmodified	_GHLENNPALEK_			0	0	0	sp|P05388-2|RLA0_HUMAN;sp|Q8NHW5|RLA0L_HUMAN;sp|P05388|RLA0_HUMAN	sp|P05388-2|RLA0_HUMAN	sp|P05388-2|RLA0_HUMAN	MULTI-MSMS		16062020_SKO_IP_Cep78	1	exp_1	615.322	2	611.315	1220.61	36218.7	-0.35815	-0.00021894	0.40006	0.00024457	0.04192	2.5626e-05	611.315	613.827	615.323	9.8771	0.23558	9.8771	9.7179	9.9535	0					70	13	8	0	0	0	1.5005e-97
GHVQPIR	7	0	1	Unmodified	_GHVQPIR_			0	0	0	sp|Q5JNZ5|RS26L_HUMAN;sp|P62854|RS26_HUMAN	sp|Q5JNZ5|RS26L_HUMAN	sp|Q5JNZ5|RS26L_HUMAN	ISO-MSMS	0	16062020_SKO_IP_Cep78	1	exp_1	403.736	2	403.735	805.456	NaN	NaN	NaN	0.55131	0.00022259	NaN	NaN	NaN	NaN	NaN	0.90659	0.66149	0.90659	0.6753	1.3368	0								0	0	0	0.0085105
GINTLER	7	0	1	Unmodified	_GINTLER_			0	0	0	sp|P52732|KIF11_HUMAN	sp|P52732|KIF11_HUMAN	sp|P52732|KIF11_HUMAN	ISO-MSMS	0	16062020_SKO_IP_Cep78	1	exp_1	401.725	2	401.725	801.434	NaN	NaN	NaN	0.4398	0.00017668	NaN	NaN	NaN	NaN	NaN	13.659	0.25224	13.659	13.523	13.775	0								0	0	0	0.02763
GLEEITVHNK	10	1	0	Unmodified	_GLEEITVHNK_			0	0	0	sp|P52732|KIF11_HUMAN	sp|P52732|KIF11_HUMAN	sp|P52732|KIF11_HUMAN	MULTI-MSMS		16062020_SKO_IP_Cep78	1	exp_1	570.308	2	570.306	1138.6	36996.3	0.031948	1.822e-05	-0.20818	-0.00011873	-0.17623	-0.00010051	570.306	572.32	574.314	18.032	0.38724	18.032	17.898	18.285	3.5527e-15					116	22	10	0	0	0	6.746e-50
GLLNGASQK	9	1	0	Unmodified	_GLLNGASQK_			0	0	0	sp|Q15393|SF3B3_HUMAN;sp|Q15393-3|SF3B3_HUMAN	sp|Q15393|SF3B3_HUMAN	sp|Q15393|SF3B3_HUMAN	ISO-MSMS	0	16062020_SKO_IP_Cep78	1	exp_1	444.252	2	444.251	886.487	NaN	NaN	NaN	0.26021	0.0001156	NaN	NaN	NaN	NaN	NaN	13.755	0.23545	13.755	13.59	13.825	-1.7764e-15								0	0	0	0.015216
GLNISAVR	8	0	1	Unmodified	_GLNISAVR_			0	0	0	sp|P23588|IF4B_HUMAN	sp|P23588|IF4B_HUMAN	sp|P23588|IF4B_HUMAN	ISO-MSMS	1	16062020_SKO_IP_Cep78	1	exp_1	418.761	2	415.248	828.482	NaN	NaN	NaN	4.4561	0.0018504	NaN	NaN	NaN	NaN	NaN	24.216	1.3224	24.216	23.67	24.992	0								0	0	0	0.011386
GLSEDTTEETLK	12	1	0	Unmodified	_GLSEDTTEETLK_			0	0	0	sp|P19338|NUCL_HUMAN	sp|P19338|NUCL_HUMAN	sp|P19338|NUCL_HUMAN	MULTI-MSMS		16062020_SKO_IP_Cep78	1	exp_1	665.828	2	661.82	1321.62	34246.4	1.7061	0.0011292	-0.85022	-0.00056269	0.85591	0.00056646	661.82	663.831	665.827	20.672	0.20152	20.672	20.56	20.762	0					91	11	12	0	0	0	3.1457e-68
GLSQSALPYRR	11	0	2	Unmodified	_GLSQSALPYRR_			0	0	1	sp|P62277|RS13_HUMAN	sp|P62277|RS13_HUMAN	sp|P62277|RS13_HUMAN	ISO-MSMS	2	16062020_SKO_IP_Cep78	1	exp_1	634.356	2	624.346	1246.68	NaN	NaN	NaN	-0.80439	-0.00050222	NaN	NaN	NaN	NaN	NaN	18.959	0.26957	18.959	18.807	19.077	0								0	0	0	0.0058376
GLSQSALPYRR	11	0	2	Unmodified	_GLSQSALPYRR_			0	0	1	sp|P62277|RS13_HUMAN	sp|P62277|RS13_HUMAN	sp|P62277|RS13_HUMAN	ISO-MSMS	0	16062020_SKO_IP_Cep78	1	exp_1	624.351	2	624.346	1246.68	NaN	NaN	NaN	-0.73052	-0.0004561	NaN	NaN	NaN	NaN	NaN	18.968	0.30318	18.968	18.807	19.11	0								0	0	0	0.00086213
GPGITGTK	8	1	0	Unmodified	_GPGITGTK_			0	0	0	sp|P98175-2|RBM10_HUMAN;sp|P98175|RBM10_HUMAN;sp|P98175-4|RBM10_HUMAN;sp|P98175-3|RBM10_HUMAN	sp|P98175-2|RBM10_HUMAN	sp|P98175-2|RBM10_HUMAN	MULTI-MSMS		16062020_SKO_IP_Cep78	1	exp_1	365.709	2	365.708	729.402	46297.7	0.52666	0.0001926	-0.072113	-2.6372e-05	0.45455	0.00016623	365.709	367.721	370.216	6.1545	0.21782	6.1545	6.05	6.2679	0					49	12	7	0	0	0	0.0089862
GPLVNASLR	9	0	1	Unmodified	_GPLVNASLR_			0	0	0	sp|O14744-5|ANM5_HUMAN;sp|O14744|ANM5_HUMAN;sp|O14744-3|ANM5_HUMAN;sp|O14744-2|ANM5_HUMAN;sp|O14744-4|ANM5_HUMAN	sp|O14744-5|ANM5_HUMAN	sp|O14744-5|ANM5_HUMAN	MULTI-MSMS		16062020_SKO_IP_Cep78	1	exp_1	463.78	2	463.775	925.535	41235.8	3.4273	0.0015895	-2.2151	-0.0010273	1.2123	0.00056222	463.774	466.783	468.778	24.514	0.86497	24.514	24.195	25.06	0					363	50	12	0	0	0	3.521e-19
GPSSVEDIK	9	1	0	Unmodified	_GPSSVEDIK_			0	0	0	sp|P06748-3|NPM_HUMAN;sp|P06748-2|NPM_HUMAN;sp|P06748|NPM_HUMAN	sp|P06748-3|NPM_HUMAN	sp|P06748-3|NPM_HUMAN	MULTI-MSMS		16062020_SKO_IP_Cep78	1	exp_1	466.241	2	466.24	930.466	39825.1	0.97331	0.0004538	-0.42628	-0.00019875	0.54703	0.00025505	466.24	468.253	470.247	13.856	0.38638	13.856	13.64	14.027	1.7764e-15					159	22	10	0	0	0	2.1153e-62
GRFTISR	7	0	2	Unmodified	_GRFTISR_			0	0	1	sp|P01780|HV307_HUMAN;sp|P01763|HV348_HUMAN;sp|P01762|HV311_HUMAN;sp|A0A0C4DH32|HV320_HUMAN;sp|A0A0B4J1X5|HV374_HUMAN;sp|A0A0B4J1V1|HV321_HUMAN;sp|P01782|HV309_HUMAN;sp|P01767|HV353_HUMAN;sp|P01766|HV313_HUMAN;sp|A0A0C4DH42|HV366_HUMAN;sp|P0DP03|HV335_HUMAN;sp|P0DP02|HVC33_HUMAN;sp|P01772|HV333_HUMAN;sp|P01768|HV330_HUMAN;sp|P01764|HV323_HUMAN;sp|P0DP04|HV43D_HUMAN;sp|A0A0B4J1X8|HV343_HUMAN;sp|A0…	sp|P01780|HV307_HUMAN	sp|P01780|HV307_HUMAN	ISO-MSMS	0	16062020_SKO_IP_Cep78	1	exp_1	419.259	2	418.74	835.466	NaN	NaN	NaN	0.39379	0.00016489	NaN	NaN	NaN	NaN	NaN	11.69	0.50407	11.69	11.469	11.973	0								0	0	0	0.0058079
GRLDSELR	8	0	2	Unmodified	_GRLDSELR_			0	0	1	CON__Q5XQN5;CON__Q922U2;sp|Q5XKE5|K2C79_HUMAN;CON__Q5XKE5;CON__P50446;sp|P13647|K2C5_HUMAN;CON__P13647	CON__Q5XQN5;sp|P13647|K2C5_HUMAN	CON__Q5XQN5	ISO-MSMS	0	16062020_SKO_IP_Cep78	1	exp_1	473.259	2	473.259	944.504	NaN	NaN	NaN	-1.7538	-0.00082998	NaN	NaN	NaN	NaN	NaN	12.884	0.42162	12.884	12.732	13.153	0								0	0	0	0.027816
GRSAINEVVTR	11	0	2	Unmodified	_GRSAINEVVTR_			0	0	1	sp|P62899-3|RL31_HUMAN;sp|P62899|RL31_HUMAN;sp|P62899-2|RL31_HUMAN	sp|P62899-3|RL31_HUMAN	sp|P62899-3|RL31_HUMAN	ISO-MSMS	2	16062020_SKO_IP_Cep78	1	exp_1	611.344	2	601.336	1200.66	NaN	NaN	NaN	-0.27436	-0.00016498	NaN	NaN	NaN	NaN	NaN	14.436	0.13414	14.436	14.362	14.497	-1.7764e-15								0	0	0	0.0014986
GRSAINEVVTR	11	0	2	Unmodified	_GRSAINEVVTR_			0	0	1	sp|P62899-3|RL31_HUMAN;sp|P62899|RL31_HUMAN;sp|P62899-2|RL31_HUMAN	sp|P62899-3|RL31_HUMAN	sp|P62899-3|RL31_HUMAN	ISO-MSMS	0	16062020_SKO_IP_Cep78	1	exp_1	601.336	2	601.336	1200.66	NaN	NaN	NaN	-0.056992	-3.4271e-05	NaN	NaN	NaN	NaN	NaN	14.433	0.16768	14.433	14.346	14.513	0								0	0	0	2.7875e-13
GSFSDTGLGDGK	12	1	0	Unmodified	_GSFSDTGLGDGK_			0	0	0	sp|Q9Y2W1|TR150_HUMAN	sp|Q9Y2W1|TR150_HUMAN	sp|Q9Y2W1|TR150_HUMAN	MULTI-MSMS		16062020_SKO_IP_Cep78	1	exp_1	574.273	2	570.762	1139.51	36821.1	0.73962	0.00042215	0.79958	0.00045637	1.5392	0.00087852	570.762	572.775	574.77	19.853	0.67367	19.853	19.447	20.121	3.5527e-15					253	39	11	0	0	0	2.5331e-08
GSLGGGFSSGGFSGGSFSR	19	0	1	Unmodified	_GSLGGGFSSGGFSGGSFSR_			0	0	0	sp|P13645|K1C10_HUMAN;CON__P13645	sp|P13645|K1C10_HUMAN	sp|P13645|K1C10_HUMAN	ISO-MSMS	0	16062020_SKO_IP_Cep78	1	exp_1	854.893	2	854.39	1706.76	NaN	NaN	NaN	1.4959	0.0012781	NaN	NaN	NaN	NaN	NaN	46.002	0.27179	46.002	45.812	46.084	0								0	0	0	0.0011023
GSSYGVTSTESYK	13	1	0	Unmodified	_GSSYGVTSTESYK_			0	0	0	sp|P98175-2|RBM10_HUMAN;sp|P98175|RBM10_HUMAN;sp|P98175-4|RBM10_HUMAN;sp|P98175-3|RBM10_HUMAN	sp|P98175-2|RBM10_HUMAN	sp|P98175-2|RBM10_HUMAN	MULTI-MSMS		16062020_SKO_IP_Cep78	1	exp_1	683.814	2	683.312	1364.61	33771.6	1.866	0.0012751	-0.086846	-5.9343e-05	1.7792	0.0012157	683.312	685.324	687.319	17.209	0.2358	17.209	17.073	17.308	0					105	13	10	0	0	0	2.366e-138
GTGIVSAPVPK	11	1	0	Unmodified	_GTGIVSAPVPK_			0	0	0	sp|P15880|RS2_HUMAN	sp|P15880|RS2_HUMAN	sp|P15880|RS2_HUMAN	MULTI-MSMS		16062020_SKO_IP_Cep78	1	exp_1	513.306	2	513.303	1024.59	38928.4	3.1291	0.0016062	-1.3853	-0.0007111	1.7438	0.00089508	513.303	515.315	517.309	24.453	0.5085	24.453	24.212	24.721	0					171	29	10	0	0	0	0.0060446
GTLDPVEK	8	1	0	Unmodified	_GTLDPVEK_			0	0	0	sp|P11142|HSP7C_HUMAN;sp|P11142-2|HSP7C_HUMAN	sp|P11142|HSP7C_HUMAN	sp|P11142|HSP7C_HUMAN	ISO-MSMS	0	16062020_SKO_IP_Cep78	1	exp_1	429.731	2	429.732	857.449	NaN	NaN	NaN	0.0015927	6.8443e-07	NaN	NaN	NaN	NaN	NaN	15.446	0.58242	15.446	15.16	15.742	0								0	0	0	0.015586
HAIPIIK	7	1	0	Unmodified	_HAIPIIK_			0	0	0	sp|O15523-3|DDX3Y_HUMAN;sp|O00571-2|DDX3X_HUMAN;sp|O15523-2|DDX3Y_HUMAN;sp|O15523|DDX3Y_HUMAN;sp|O00571|DDX3X_HUMAN	sp|O15523-3|DDX3Y_HUMAN	sp|O15523-3|DDX3Y_HUMAN	MULTI-MSMS		16062020_SKO_IP_Cep78	1	exp_1	396.261	2	396.261	790.507	44992.3	1.5585	0.00061759	0.60756	0.00024075	2.1661	0.00085834	396.261	398.273	400.268	17.692	0.25252	17.692	17.528	17.78	0					66	14	8	0	0	0	6.5434e-15
HEQGLSTALSVEK	13	1	0	Unmodified	_HEQGLSTALSVEK_			0	0	0	sp|Q96I25|SPF45_HUMAN	sp|Q96I25|SPF45_HUMAN	sp|Q96I25|SPF45_HUMAN	ISO-MSMS	0	16062020_SKO_IP_Cep78	1	exp_1	700.364	2	699.865	1397.72	NaN	NaN	NaN	0.41069	0.00028743	NaN	NaN	NaN	NaN	NaN	22.354	0.22939	22.354	22.214	22.443	0								0	0	0	9.7132e-61
HEQGLSTALSVEK	13	1	0	Unmodified	_HEQGLSTALSVEK_			0	0	0	sp|Q96I25|SPF45_HUMAN	sp|Q96I25|SPF45_HUMAN	sp|Q96I25|SPF45_HUMAN	MSMS	2	16062020_SKO_IP_Cep78	1	exp_1	703.871	2	699.865	1397.72	NaN	NaN	NaN	NaN	NaN	NaN	NaN	NaN	NaN	NaN	22.276	1	22.276	21.776	22.776	0								0	0	0	3.2367e-117
HFELGGDK	8	1	0	Unmodified	_HFELGGDK_			0	0	0	sp|P83881|RL36A_HUMAN;sp|Q969Q0|RL36L_HUMAN	sp|P83881|RL36A_HUMAN	sp|P83881|RL36A_HUMAN	MULTI-MSMS		16062020_SKO_IP_Cep78	1	exp_1	455.73	2	451.722	901.429	40694.4	1.2036	0.00054369	-0.11205	-5.0614e-05	1.0915	0.00049308	451.722	453.735	455.729	13.765	0.70532	13.765	13.355	14.06	0					160	41	9	0	0	0	2.3487e-58
HFELGGDKK	9	2	0	Unmodified	_HFELGGDKK_			0	0	1	sp|P83881|RL36A_HUMAN;sp|Q969Q0|RL36L_HUMAN	sp|P83881|RL36A_HUMAN	sp|P83881|RL36A_HUMAN	ISO-MSMS	2	16062020_SKO_IP_Cep78	1	exp_1	524.285	2	515.769	1029.52	NaN	NaN	NaN	0.5624	0.00029007	NaN	NaN	NaN	NaN	NaN	7.0852	0.14483	7.0852	6.987	7.1318	0								0	0	0	4.7206e-07
HGSLGFLPR	9	0	1	Unmodified	_HGSLGFLPR_			0	0	0	sp|P39023|RL3_HUMAN	sp|P39023|RL3_HUMAN	sp|P39023|RL3_HUMAN	ISO-MSMS	2	16062020_SKO_IP_Cep78	1	exp_1	497.779	2	492.275	982.535	NaN	NaN	NaN	-2.3569	-0.0011602	NaN	NaN	NaN	NaN	NaN	28.381	0.25308	28.381	28.238	28.491	-3.5527e-15								0	0	0	1.8815e-11
HGSLGFLPR	9	0	1	Unmodified	_HGSLGFLPR_			0	0	0	sp|P39023|RL3_HUMAN	sp|P39023|RL3_HUMAN	sp|P39023|RL3_HUMAN	ISO-MSMS	0	16062020_SKO_IP_Cep78	1	exp_1	492.273	2	492.275	982.535	NaN	NaN	NaN	2.2608	0.0011129	NaN	NaN	NaN	NaN	NaN	28.405	0.42857	28.405	28.154	28.582	0								0	0	0	1.7707e-17
HIDFSLR	7	0	1	Unmodified	_HIDFSLR_			0	0	0	sp|P46781|RS9_HUMAN	sp|P46781|RS9_HUMAN	sp|P46781|RS9_HUMAN	ISO-MSMS	0	16062020_SKO_IP_Cep78	1	exp_1	444.239	2	444.24	886.466	NaN	NaN	NaN	-1.2302	-0.0005465	NaN	NaN	NaN	NaN	NaN	28.734	0.24232	28.734	28.638	28.88	0								0	0	0	1.2842e-31
HIEIRDQALSNAQAK	15	1	1	Unmodified	_HIEIRDQALSNAQAK_			0	0	1	sp|Q4VCS5-2|AMOT_HUMAN;sp|Q4VCS5|AMOT_HUMAN	sp|Q4VCS5-2|AMOT_HUMAN	sp|Q4VCS5-2|AMOT_HUMAN	ISO-MSMS	1	16062020_SKO_IP_Cep78	1	exp_1	852.476	2	847.453	1692.89	NaN	NaN	NaN	-0.25084	-0.00021258	NaN	NaN	NaN	NaN	NaN	17.532	0.21978	17.532	17.426	17.646	3.5527e-15								0	0	0	0
HIYYITGETK	10	1	0	Unmodified	_HIYYITGETK_			0	0	0	sp|P07900|HS90A_HUMAN;sp|P07900-2|HS90A_HUMAN;sp|Q58FG0|HS905_HUMAN	sp|P07900|HS90A_HUMAN	sp|P07900|HS90A_HUMAN	ISO-MSMS	2	16062020_SKO_IP_Cep78	1	exp_1	616.824	2	612.817	1223.62	NaN	NaN	NaN	-0.74321	-0.00045545	NaN	NaN	NaN	NaN	NaN	19.068	0.30261	19.068	18.942	19.245	0								0	0	0	0.013445
HLQLAIR	7	0	1	Unmodified	_HLQLAIR_			0	0	0	sp|Q99878|H2A1J_HUMAN;sp|Q96KK5|H2A1H_HUMAN;sp|Q9BTM1|H2AJ_HUMAN;sp|Q93077|H2A1C_HUMAN;sp|Q7L7L0|H2A3_HUMAN;sp|P20671|H2A1D_HUMAN;sp|P0C0S8|H2A1_HUMAN;sp|P04908|H2A1B_HUMAN;sp|P16104|H2AX_HUMAN;sp|Q9BTM1-2|H2AJ_HUMAN;sp|Q71UI9-3|H2AV_HUMAN;sp|Q96QV6|H2A1A_HUMAN;sp|Q71UI9-4|H2AV_HUMAN;sp|Q71UI9-2|H2AV_HUMAN;sp|Q71UI9|H2AV_HUMAN;sp|P0C0S5|H2AZ_HUMAN;sp|Q16777|H2A2C_HUMAN;sp|Q6FI13|H2A2A_HUMAN	sp|Q99878|H2A1J_HUMAN;sp|Q71UI9-4|H2AV_HUMAN;sp|Q16777|H2A2C_HUMAN	sp|Q16777|H2A2C_HUMAN	ISO-MSMS	0	16062020_SKO_IP_Cep78	1	exp_1	425.767	2	425.767	849.518	NaN	NaN	NaN	-0.52953	-0.00022546	NaN	NaN	NaN	NaN	NaN	19.533	0.28779	19.533	19.413	19.701	0								0	0	0	0.022273
HLTDAYFK	8	1	0	Unmodified	_HLTDAYFK_			0	0	0	sp|Q02878|RL6_HUMAN	sp|Q02878|RL6_HUMAN	sp|Q02878|RL6_HUMAN	ISO-MSMS	0	16062020_SKO_IP_Cep78	1	exp_1	497.755	2	497.753	993.492	NaN	NaN	NaN	3.0929	0.0015395	NaN	NaN	NaN	NaN	NaN	20.654	0.33668	20.654	20.442	20.778	-3.5527e-15								0	0	0	0.0013618
HLTDAYFK	8	1	0	Unmodified	_HLTDAYFK_			0	0	0	sp|Q02878|RL6_HUMAN	sp|Q02878|RL6_HUMAN	sp|Q02878|RL6_HUMAN	ISO-MSMS	2	16062020_SKO_IP_Cep78	1	exp_1	501.76	2	497.753	993.492	NaN	NaN	NaN	-1.086	-0.00054055	NaN	NaN	NaN	NaN	NaN	20.676	0.37022	20.676	20.442	20.812	-3.5527e-15								0	0	0	0.010051
HLVTDNPSK	9	1	0	Unmodified	_HLVTDNPSK_			0	0	0	sp|Q5W0B1|RN219_HUMAN	sp|Q5W0B1|RN219_HUMAN	sp|Q5W0B1|RN219_HUMAN	MULTI-MSMS		16062020_SKO_IP_Cep78	1	exp_1	505.767	2	505.767	1009.52	39647.1	0.87084	0.00044044	-1.3271	-0.00067123	-0.45631	-0.00023079	505.767	507.779	509.774	6.26	0.11726	6.26	6.1841	6.3014	-8.8818e-16					38	6	9	0	0	0	5.1853e-282
HNIQALLK	8	1	0	Unmodified	_HNIQALLK_			0	0	0	sp|P10644-2|KAP0_HUMAN;sp|P10644|KAP0_HUMAN	sp|P10644-2|KAP0_HUMAN	sp|P10644-2|KAP0_HUMAN	ISO-MSMS	2	16062020_SKO_IP_Cep78	1	exp_1	472.792	2	468.785	935.555	NaN	NaN	NaN	-0.0074077	-3.4726e-06	NaN	NaN	NaN	NaN	NaN	18.972	0.15163	18.972	18.892	19.043	0								0	0	0	0.0099183
HNIQALLK	8	1	0	Unmodified	_HNIQALLK_			0	0	0	sp|P10644-2|KAP0_HUMAN;sp|P10644|KAP0_HUMAN	sp|P10644-2|KAP0_HUMAN	sp|P10644-2|KAP0_HUMAN	ISO-MSMS	0	16062020_SKO_IP_Cep78	1	exp_1	468.786	2	468.785	935.555	NaN	NaN	NaN	2.1819	0.0010228	NaN	NaN	NaN	NaN	NaN	18.968	0.15163	18.968	18.892	19.043	0								0	0	0	2.1081e-06
HQEGEIFDTEK	11	1	0	Unmodified	_HQEGEIFDTEK_			0	0	0	sp|Q02878|RL6_HUMAN	sp|Q02878|RL6_HUMAN	sp|Q02878|RL6_HUMAN	MULTI-MSMS		16062020_SKO_IP_Cep78	1	exp_1	666.809	2	666.807	1331.6	34101.4	1.8633	0.0012424	0.061225	4.0825e-05	1.9245	0.0012833	666.807	668.819	670.814	17.653	0.25252	17.653	17.528	17.78	0					132	14	13	0	0	0	1.4706e-157
HQEHILR	7	0	1	Unmodified	_HQEHILR_			0	0	0	sp|Q13263-2|TIF1B_HUMAN;sp|Q13263|TIF1B_HUMAN	sp|Q13263-2|TIF1B_HUMAN	sp|Q13263-2|TIF1B_HUMAN	ISO-MSMS	0	16062020_SKO_IP_Cep78	1	exp_1	466.757	2	466.757	931.499	NaN	NaN	NaN	-0.15787	-7.3687e-05	NaN	NaN	NaN	NaN	NaN	0.94856	0.18544	0.94856	0.84922	1.0347	-1.1102e-16								0	0	0	0.0036686
HQSFVLVGETGSGK	14	1	0	Unmodified	_HQSFVLVGETGSGK_			0	0	0	sp|O43143|DHX15_HUMAN	sp|O43143|DHX15_HUMAN	sp|O43143|DHX15_HUMAN	MSMS	2	16062020_SKO_IP_Cep78	1	exp_1	727.382	2	723.373	1444.73	NaN	NaN	NaN	NaN	NaN	NaN	NaN	NaN	NaN	NaN	25.382	1	25.382	24.882	25.882	0								0	0	0	0.013834
HSLPSAYR	8	0	1	Unmodified	_HSLPSAYR_			0	0	0	sp|Q12872|SFSWA_HUMAN;sp|Q12872-2|SFSWA_HUMAN	sp|Q12872|SFSWA_HUMAN	sp|Q12872|SFSWA_HUMAN	MSMS	0	16062020_SKO_IP_Cep78	1	exp_1	465.74	2	465.743	929.472	NaN	NaN	NaN	NaN	NaN	NaN	NaN	NaN	NaN	NaN	9.7221	1	9.7221	9.2221	10.222	0								0	0	0	1.319e-13
HTGPNSPDTANDGFVR	16	0	1	Unmodified	_HTGPNSPDTANDGFVR_			0	0	0	sp|P55795|HNRH2_HUMAN;sp|P31943|HNRH1_HUMAN	sp|P55795|HNRH2_HUMAN	sp|P55795|HNRH2_HUMAN	ISO-MSMS	0	16062020_SKO_IP_Cep78	1	exp_1	842.889	2	842.887	1683.76	NaN	NaN	NaN	2.1275	0.0017932	NaN	NaN	NaN	NaN	NaN	16.59	0.13482	16.59	16.533	16.668	0								0	0	0	2.526e-25
HTLNQIDSVK	10	1	0	Unmodified	_HTLNQIDSVK_			0	0	0	CON__P12763	CON__P12763	CON__P12763	ISO-MSMS	0	16062020_SKO_IP_Cep78	1	exp_1	577.807	2	577.812	1153.61	NaN	NaN	NaN	0.11734	6.7798e-05	NaN	NaN	NaN	NaN	NaN	14.203	0.18478	14.203	14.094	14.279	0								0	0	0	0.0064187
HTLTQIK	7	1	0	Unmodified	_HTLTQIK_			0	0	0	sp|P40227-2|TCPZ_HUMAN;sp|P40227|TCPZ_HUMAN	sp|P40227-2|TCPZ_HUMAN	sp|P40227-2|TCPZ_HUMAN	ISO-MSMS	0	16062020_SKO_IP_Cep78	1	exp_1	420.751	2	420.751	839.487	NaN	NaN	NaN	-0.1322	-5.5624e-05	NaN	NaN	NaN	NaN	NaN	6.773	0.16575	6.773	6.6705	6.8362	0								0	0	0	0.026981
HVVFIAQR	8	0	1	Unmodified	_HVVFIAQR_			0	0	0	sp|P62081|RS7_HUMAN	sp|P62081|RS7_HUMAN	sp|P62081|RS7_HUMAN	ISO-MSMS	0	16062020_SKO_IP_Cep78	1	exp_1	485.286	2	485.285	968.556	NaN	NaN	NaN	-0.36529	-0.00017727	NaN	NaN	NaN	NaN	NaN	17.546	0.32056	17.546	17.393	17.713	0								0	0	0	0.017741
IAEVGAGGNK	10	1	0	Unmodified	_IAEVGAGGNK_			0	0	0	sp|Q00577|PURA_HUMAN	sp|Q00577|PURA_HUMAN	sp|Q00577|PURA_HUMAN	ISO-MSMS	2	16062020_SKO_IP_Cep78	1	exp_1	462.257	2	458.248	914.482	NaN	NaN	NaN	-0.51955	-0.00023808	NaN	NaN	NaN	NaN	NaN	6.7775	0.13204	6.7775	6.6874	6.8194	0								0	0	0	0.020405
IAEVGAGGNK	10	1	0	Unmodified	_IAEVGAGGNK_			0	0	0	sp|Q00577|PURA_HUMAN	sp|Q00577|PURA_HUMAN	sp|Q00577|PURA_HUMAN	ISO-MSMS	0	16062020_SKO_IP_Cep78	1	exp_1	458.249	2	458.248	914.482	NaN	NaN	NaN	-0.034809	-1.5951e-05	NaN	NaN	NaN	NaN	NaN	6.7775	0.16558	6.7775	6.6874	6.853	0								0	0	0	0.023049
IASDGLK	7	1	0	Unmodified	_IASDGLK_			0	0	0	sp|P61247|RS3A_HUMAN	sp|P61247|RS3A_HUMAN	sp|P61247|RS3A_HUMAN	ISO-MSMS	0	16062020_SKO_IP_Cep78	1	exp_1	352.203	2	352.203	702.391	NaN	NaN	NaN	-0.39775	-0.00014009	NaN	NaN	NaN	NaN	NaN	7.1641	0.1038	7.1641	7.1141	7.2179	0								0	0	0	0.020611
IASDGLK	7	1	0	Unmodified	_IASDGLK_			0	0	0	sp|P61247|RS3A_HUMAN	sp|P61247|RS3A_HUMAN	sp|P61247|RS3A_HUMAN	ISO-MSMS	2	16062020_SKO_IP_Cep78	1	exp_1	356.209	2	352.203	702.391	NaN	NaN	NaN	-1.4658	-0.00051626	NaN	NaN	NaN	NaN	NaN	7.1677	0.11496	7.1677	7.1088	7.2238	0								0	0	0	0.027832
IDDVVNTR	8	0	1	Unmodified	_IDDVVNTR_			0	0	0	sp|P50991-2|TCPD_HUMAN;sp|P50991|TCPD_HUMAN	sp|P50991-2|TCPD_HUMAN	sp|P50991-2|TCPD_HUMAN	MSMS	0	16062020_SKO_IP_Cep78	1	exp_1	466.247	2	466.246	930.477	NaN	NaN	NaN	NaN	NaN	NaN	NaN	NaN	NaN	NaN	15.692	1	15.692	15.192	16.192	0								0	0	0	3.2366e-22
IDEPLEGSEDR	11	0	1	Unmodified	_IDEPLEGSEDR_			0	0	0	sp|P61978-3|HNRPK_HUMAN;sp|P61978|HNRPK_HUMAN;sp|P61978-2|HNRPK_HUMAN	sp|P61978-3|HNRPK_HUMAN	sp|P61978-3|HNRPK_HUMAN	ISO-MSMS	0	16062020_SKO_IP_Cep78	1	exp_1	630.293	2	630.291	1258.57	NaN	NaN	NaN	-1.3756	-0.00086703	NaN	NaN	NaN	NaN	NaN	20.403	0.30332	20.403	20.206	20.509	0								0	0	0	0.0059507
IDIDYQK	7	1	0	Unmodified	_IDIDYQK_			0	0	0	sp|Q13435|SF3B2_HUMAN	sp|Q13435|SF3B2_HUMAN	sp|Q13435|SF3B2_HUMAN	MULTI-MSMS		16062020_SKO_IP_Cep78	1	exp_1	452.299	2	447.732	893.449	42422.5	0.48963	0.00021923	-0.83033	-0.00037177	-0.3407	-0.00015254	447.732	449.744	451.739	20.769	0.44529	20.769	20.627	21.073	0					173	37	10	0	0	0	2.6155e-22
IDISNVK	7	1	0	Unmodified	_IDISNVK_			0	0	0	sp|Q02878|RL6_HUMAN	sp|Q02878|RL6_HUMAN	sp|Q02878|RL6_HUMAN	MULTI-MSMS		16062020_SKO_IP_Cep78	1	exp_1	398.737	2	394.729	787.444	43773.3	0.54607	0.00021555	0.11942	4.7138e-05	0.66549	0.00026269	394.729	396.742	398.736	19.403	0.6239	19.403	19.077	19.701	0					191	36	11	0	0	0	2.6086e-31
IDKPILK	7	2	0	Unmodified	_IDKPILK_			0	0	1	sp|P62917|RL8_HUMAN	sp|P62917|RL8_HUMAN	sp|P62917|RL8_HUMAN	MULTI-MSMS		16062020_SKO_IP_Cep78	1	exp_1	413.774	2	413.773	825.532	42213.5	1.4786	0.00061181	0.25056	0.00010368	1.7292	0.00071548	413.774	417.798	421.787	13.697	0.23546	13.697	13.556	13.792	-1.7764e-15					74	12	9	0	0	0	1.913e-31
IEEYISK	7	1	0	Unmodified	_IEEYISK_			0	0	0	sp|Q8WWY3-4|PRP31_HUMAN;sp|Q8WWY3|PRP31_HUMAN;sp|Q8WWY3-2|PRP31_HUMAN	sp|Q8WWY3-4|PRP31_HUMAN	sp|Q8WWY3-4|PRP31_HUMAN	MULTI-MSMS		16062020_SKO_IP_Cep78	1	exp_1	441.234	2	441.234	880.454	42091.5	1.0664	0.00047051	-1.7614	-0.00077721	-0.69508	-0.00030669	441.234	443.246	445.241	16.402	0.25259	16.402	16.298	16.55	-3.5527e-15					83	14	8	0	0	0	9.4713e-15
IEGVYAR	7	0	1	Unmodified	_IEGVYAR_			0	0	0	sp|P18077|RL35A_HUMAN	sp|P18077|RL35A_HUMAN	sp|P18077|RL35A_HUMAN	ISO-MSMS	0	16062020_SKO_IP_Cep78	1	exp_1	404.223	2	404.222	806.429	NaN	NaN	NaN	-0.57764	-0.0002335	NaN	NaN	NaN	NaN	NaN	14.367	0.21796	14.367	14.279	14.497	0								0	0	0	0.02416
IEPVGIQR	8	0	1	Unmodified	_IEPVGIQR_			0	0	0	sp|Q7Z353-2|HDX_HUMAN;sp|Q7Z353|HDX_HUMAN	sp|Q7Z353-2|HDX_HUMAN	sp|Q7Z353-2|HDX_HUMAN	MULTI-MSMS		16062020_SKO_IP_Cep78	1	exp_1	456.268	2	456.269	910.524	41684.1	0.62211	0.00028385	-1.1388	-0.00051961	-0.5167	-0.00023576	456.269	459.278	461.274	19.164	0.35279	19.164	18.976	19.329	0					77	20	7	0	0	0	0.0039744
IFIGTFK	7	1	0	Unmodified	_IFIGTFK_			0	0	0	sp|P14678-2|RSMB_HUMAN;sp|P63162|RSMN_HUMAN;sp|P14678|RSMB_HUMAN;sp|P63162-2|RSMN_HUMAN;sp|P14678-3|RSMB_HUMAN	sp|P14678-2|RSMB_HUMAN	sp|P14678-2|RSMB_HUMAN	MULTI-MSMS		16062020_SKO_IP_Cep78	1	exp_1	415.261	2	413.247	824.48	43634.9	2.7046	0.0011177	0.42732	0.00017659	3.1319	0.0012943	413.247	415.259	417.255	41.135	0.50782	41.135	40.877	41.385	-7.1054e-15					170	29	10	0	0	0	0.00094801
IGAVEEELNR	10	0	1	Unmodified	_IGAVEEELNR_			0	0	0	sp|P52732|KIF11_HUMAN	sp|P52732|KIF11_HUMAN	sp|P52732|KIF11_HUMAN	ISO-MSMS	0	16062020_SKO_IP_Cep78	1	exp_1	565.295	2	565.296	1128.58	NaN	NaN	NaN	-0.034852	-1.9702e-05	NaN	NaN	NaN	NaN	NaN	23.903	0.25418	23.903	23.805	24.059	0								0	0	0	0.01625
IGGIGTVPVGR	11	0	1	Unmodified	_IGGIGTVPVGR_			0	0	0	sp|Q5VTE0|EF1A3_HUMAN;sp|P68104|EF1A1_HUMAN;sp|P68104-2|EF1A1_HUMAN;sp|Q05639|EF1A2_HUMAN	sp|Q5VTE0|EF1A3_HUMAN	sp|Q5VTE0|EF1A3_HUMAN	ISO-MSMS	0	16062020_SKO_IP_Cep78	1	exp_1	513.31	2	513.309	1024.6	NaN	NaN	NaN	-1.2406	-0.0006368	NaN	NaN	NaN	NaN	NaN	31.424	0.32168	31.424	31.233	31.555	0								0	0	0	0.0085788
IGHPAPNFK	9	1	0	Unmodified	_IGHPAPNFK_			0	0	0	sp|Q06830|PRDX1_HUMAN	sp|Q06830|PRDX1_HUMAN	sp|Q06830|PRDX1_HUMAN	ISO-MSMS	0	16062020_SKO_IP_Cep78	1	exp_1	491.272	2	490.769	979.524	NaN	NaN	NaN	0.34136	0.00016753	NaN	NaN	NaN	NaN	NaN	12.83	0.25328	12.83	12.698	12.951	1.7764e-15								0	0	0	0.0098269
IGNSGVEEIK	10	1	0	Unmodified	_IGNSGVEEIK_			0	0	0	sp|Q9Y2H1|ST38L_HUMAN;sp|Q9Y2H1-2|ST38L_HUMAN	sp|Q9Y2H1|ST38L_HUMAN	sp|Q9Y2H1|ST38L_HUMAN	ISO-MSMS	2	16062020_SKO_IP_Cep78	1	exp_1	527.286	2	523.28	1044.55	NaN	NaN	NaN	1.2053	0.0006307	NaN	NaN	NaN	NaN	NaN	16.196	0.2189	16.196	16.062	16.281	0								0	0	0	0.025011
IGNSGVEEIK	10	1	0	Unmodified	_IGNSGVEEIK_			0	0	0	sp|Q9Y2H1|ST38L_HUMAN;sp|Q9Y2H1-2|ST38L_HUMAN	sp|Q9Y2H1|ST38L_HUMAN	sp|Q9Y2H1|ST38L_HUMAN	ISO-MSMS	0	16062020_SKO_IP_Cep78	1	exp_1	523.279	2	523.28	1044.55	NaN	NaN	NaN	1.1505	0.00060201	NaN	NaN	NaN	NaN	NaN	16.219	0.23529	16.219	16.096	16.331	0								0	0	0	0.011618
IGQGYLIK	8	1	0	Unmodified	_IGQGYLIK_			0	0	0	sp|P39023|RL3_HUMAN	sp|P39023|RL3_HUMAN	sp|P39023|RL3_HUMAN	MULTI-MSMS		16062020_SKO_IP_Cep78	1	exp_1	450.276	2	446.269	890.523	41346	1.8889	0.00084297	1.0353	0.00046203	2.9243	0.001305	446.269	448.281	450.276	26.167	0.69486	26.167	25.804	26.499	-3.5527e-15					239	40	12	0	0	0	2.4443e-16
IGVLDEGK	8	1	0	Unmodified	_IGVLDEGK_			0	0	0	sp|P46781|RS9_HUMAN	sp|P46781|RS9_HUMAN	sp|P46781|RS9_HUMAN	ISO-MSMS	2	16062020_SKO_IP_Cep78	1	exp_1	419.742	2	415.735	829.455	NaN	NaN	NaN	-0.96841	-0.0004026	NaN	NaN	NaN	NaN	NaN	20.366	0.62395	20.366	20.071	20.695	0								0	0	0	0.010435
IHAEFVQQK	9	1	0	Unmodified	_IHAEFVQQK_			0	0	0	sp|P19474|RO52_HUMAN	sp|P19474|RO52_HUMAN	sp|P19474|RO52_HUMAN	MULTI-MSMS		16062020_SKO_IP_Cep78	1	exp_1	550.3	2	550.298	1098.58	37815.4	1.4657	0.00080659	0.31553	0.00017364	1.7813	0.00098022	550.299	552.311	554.306	14.271	0.13416	14.271	14.195	14.329	0					59	7	11	0	0	0	3.0347e-149
IHQETFGK	8	1	0	Unmodified	_IHQETFGK_			0	0	0	sp|Q15393|SF3B3_HUMAN;sp|Q15393-2|SF3B3_HUMAN	sp|Q15393|SF3B3_HUMAN	sp|Q15393|SF3B3_HUMAN	ISO-MSMS	0	16062020_SKO_IP_Cep78	1	exp_1	480.752	2	480.251	958.487	NaN	NaN	NaN	1.9523	0.00093757	NaN	NaN	NaN	NaN	NaN	6.8278	0.20009	6.8278	6.7032	6.9033	0								0	0	0	0.009384
IIDEVVNK	8	1	0	Unmodified	_IIDEVVNK_			0	0	0	sp|O95816-2|BAG2_HUMAN;sp|O95816|BAG2_HUMAN	sp|O95816-2|BAG2_HUMAN	sp|O95816-2|BAG2_HUMAN	ISO-MSMS	0	16062020_SKO_IP_Cep78	1	exp_1	465.271	2	465.269	928.523	NaN	NaN	NaN	0.92296	0.00042942	NaN	NaN	NaN	NaN	NaN	18.665	0.3704	18.665	18.504	18.875	0								0	0	0	0.0086447
IIEDQQESLNK	11	1	0	Unmodified	_IIEDQQESLNK_			0	0	0	sp|P05455|LA_HUMAN	sp|P05455|LA_HUMAN	sp|P05455|LA_HUMAN	ISO-MSMS	0	16062020_SKO_IP_Cep78	1	exp_1	658.84	2	658.838	1315.66	NaN	NaN	NaN	-0.76621	-0.00050481	NaN	NaN	NaN	NaN	NaN	16.467	0.18544	16.467	16.365	16.55	0								0	0	0	1.7976e-29
ILALEADMTK	10	1	0	Oxidation (M)	_ILALEADM(ox)TK_	ILALEADM(1)TK	ILALEADM(93.18)TK	0	1	0	sp|Q4VCS5-2|AMOT_HUMAN;sp|Q4VCS5|AMOT_HUMAN;sp|Q8IY63-2|AMOL1_HUMAN;sp|Q8IY63|AMOL1_HUMAN	sp|Q4VCS5-2|AMOT_HUMAN	sp|Q4VCS5-2|AMOT_HUMAN	ISO-MSMS	1	16062020_SKO_IP_Cep78	1	exp_1	562.809	2	560.8	1119.58	NaN	NaN	NaN	-0.87421	-0.00049026	NaN	NaN	NaN	NaN	NaN	28.609	0.31224	28.609	28.437	28.75	0								0	0	0	0.0087487
ILALEADMTK	10	1	0	Oxidation (M)	_ILALEADM(ox)TK_	ILALEADM(1)TK	ILALEADM(105.52)TK	0	1	0	sp|Q4VCS5-2|AMOT_HUMAN;sp|Q4VCS5|AMOT_HUMAN;sp|Q8IY63-2|AMOL1_HUMAN;sp|Q8IY63|AMOL1_HUMAN	sp|Q4VCS5-2|AMOT_HUMAN	sp|Q4VCS5-2|AMOT_HUMAN	ISO-MSMS	0	16062020_SKO_IP_Cep78	1	exp_1	560.797	2	560.8	1119.58	NaN	NaN	NaN	-0.96656	-0.00054204	NaN	NaN	NaN	NaN	NaN	28.61	0.2253	28.61	28.503	28.729	0								0	0	0	0.0032564
ILFLDPSGK	9	1	0	Unmodified	_ILFLDPSGK_			0	0	0	sp|O95881|TXD12_HUMAN	sp|O95881|TXD12_HUMAN	sp|O95881|TXD12_HUMAN	MULTI-MSMS		16062020_SKO_IP_Cep78	1	exp_1	497.3	2	495.287	988.559	39766.9	1.8516	0.0009171	0.79455	0.00039353	2.6462	0.0013106	495.287	497.3	499.294	54.815	0.51449	54.815	54.537	55.052	-7.1054e-15					158	30	7	0	0	0	0.018677
ILGPGLNK	8	1	0	Unmodified	_ILGPGLNK_			0	0	0	sp|P62906|RL10A_HUMAN	sp|P62906|RL10A_HUMAN	sp|P62906|RL10A_HUMAN	MULTI-MSMS		16062020_SKO_IP_Cep78	1	exp_1	410.263	2	406.255	810.496	43856.1	0.95851	0.0003894	-0.54013	-0.00021943	0.41838	0.00016997	406.255	408.268	410.262	19.509	0.40547	19.509	19.295	19.701	-3.5527e-15					157	23	10	0	0	0	0.0085044
ILQDSLGGR	9	0	1	Unmodified	_ILQDSLGGR_			0	0	0	sp|P52732|KIF11_HUMAN	sp|P52732|KIF11_HUMAN	sp|P52732|KIF11_HUMAN	MULTI-MSMS		16062020_SKO_IP_Cep78	1	exp_1	484.772	2	479.769	957.524	39217.5	1.3978	0.00067063	-0.084315	-4.0452e-05	1.3135	0.00063017	479.77	482.78	484.774	19.773	0.4721	19.773	19.531	20.003	0					197	27	11	0	0	0	3.0198e-13
ILSGVVTK	8	1	0	Unmodified	_ILSGVVTK_			0	0	0	sp|P62280|RS11_HUMAN	sp|P62280|RS11_HUMAN	sp|P62280|RS11_HUMAN	MULTI-MSMS		16062020_SKO_IP_Cep78	1	exp_1	408.765	2	408.763	815.512	43649	1.9428	0.00079415	0.25314	0.00010347	2.1959	0.00089762	408.763	410.776	412.77	18.731	0.31999	18.731	18.572	18.892	0					135	18	11	0	0	0	0.00018202
IMSSPLSK	8	1	0	Oxidation (M)	_IM(ox)SSPLSK_	IM(1)SSPLSK	IM(110.31)SSPLSK	0	1	0	sp|P61254|RL26_HUMAN;sp|Q9UNX3|RL26L_HUMAN	sp|P61254|RL26_HUMAN	sp|P61254|RL26_HUMAN	ISO-MSMS	2	16062020_SKO_IP_Cep78	1	exp_1	443.744	2	439.736	877.458	NaN	NaN	NaN	-0.35353	-0.00015546	NaN	NaN	NaN	NaN	NaN	12.32	0.28662	12.32	12.176	12.462	0								0	0	0	0.0049156
IMSSPLSK	8	1	0	Oxidation (M)	_IM(ox)SSPLSK_	IM(1)SSPLSK	IM(142.36)SSPLSK	0	1	0	sp|P61254|RL26_HUMAN;sp|Q9UNX3|RL26L_HUMAN	sp|P61254|RL26_HUMAN	sp|P61254|RL26_HUMAN	ISO-MSMS	0	16062020_SKO_IP_Cep78	1	exp_1	439.737	2	439.736	877.458	NaN	NaN	NaN	0.20559	9.0404e-05	NaN	NaN	NaN	NaN	NaN	12.332	0.45427	12.332	12.193	12.647	0								0	0	0	0.0011774
IPQALEK	7	1	0	Unmodified	_IPQALEK_			0	0	0	sp|Q13435|SF3B2_HUMAN	sp|Q13435|SF3B2_HUMAN	sp|Q13435|SF3B2_HUMAN	MULTI-MSMS		16062020_SKO_IP_Cep78	1	exp_1	399.74	2	399.74	797.465	43546.6	0.29201	0.00011673	-0.0019787	-7.9097e-07	0.29003	0.00011594	399.74	401.752	403.747	14.495	0.28502	14.495	14.362	14.647	0					82	16	8	0	0	0	7.6456e-32
IQSSLSSASPSK	12	1	0	Unmodified	_IQSSLSSASPSK_			0	0	0	sp|Q5W0B1|RN219_HUMAN	sp|Q5W0B1|RN219_HUMAN	sp|Q5W0B1|RN219_HUMAN	ISO-MSMS	1	16062020_SKO_IP_Cep78	1	exp_1	598.83	2	596.314	1190.61	NaN	NaN	NaN	-1.3945	-0.00083158	NaN	NaN	NaN	NaN	NaN	13.274	0.20171	13.274	13.153	13.355	1.7764e-15								0	0	0	0.026295
IQSSLSSASPSK	12	1	0	Unmodified	_IQSSLSSASPSK_			0	0	0	sp|Q5W0B1|RN219_HUMAN	sp|Q5W0B1|RN219_HUMAN	sp|Q5W0B1|RN219_HUMAN	MSMS	2	16062020_SKO_IP_Cep78	1	exp_1	600.322	2	596.314	1190.61	NaN	NaN	NaN	NaN	NaN	NaN	NaN	NaN	NaN	NaN	13.231	1	13.231	12.731	13.731	0								0	0	0	3.2178e-20
IQVLTDK	7	1	0	Unmodified	_IQVLTDK_			0	0	0	sp|O95232|LC7L3_HUMAN	sp|O95232|LC7L3_HUMAN	sp|O95232|LC7L3_HUMAN	MULTI-MSMS		16062020_SKO_IP_Cep78	1	exp_1	408.746	2	408.745	815.475	43342.2	2.1866	0.00089374	0.50472	0.0002063	2.6913	0.0011	408.745	410.757	412.752	17.654	0.2358	17.654	17.511	17.747	0					94	13	10	0	0	0	7.5147e-55
IRVDVADQAQDK	12	1	1	Unmodified	_IRVDVADQAQDK_			0	0	1	sp|P23588|IF4B_HUMAN;sp|P23588-2|IF4B_HUMAN	sp|P23588|IF4B_HUMAN	sp|P23588|IF4B_HUMAN	MULTI-MSMS		16062020_SKO_IP_Cep78	1	exp_1	684.381	2	679.357	1356.7	33669.2	1.7119	0.001163	-0.35152	-0.00023881	1.3604	0.00092418	679.357	684.38	688.368	17.39	0.23665	17.39	17.258	17.494	0					144	13	17	0	0	0	5.7784e-83
ISQETEQR	8	0	1	Unmodified	_ISQETEQR_			0	0	0	sp|P52732|KIF11_HUMAN	sp|P52732|KIF11_HUMAN	sp|P52732|KIF11_HUMAN	MSMS	0	16062020_SKO_IP_Cep78	1	exp_1	495.746	2	495.746	989.478	NaN	NaN	NaN	NaN	NaN	NaN	NaN	NaN	NaN	NaN	3.0546	1	3.0546	2.5546	3.5546	0								0	0	0	8.0535e-41
ISQETEQR	8	0	1	Unmodified	_ISQETEQR_			0	0	0	sp|P52732|KIF11_HUMAN	sp|P52732|KIF11_HUMAN	sp|P52732|KIF11_HUMAN	MSMS	0	16062020_SKO_IP_Cep78	1	exp_1	495.747	2	495.746	989.478	NaN	NaN	NaN	NaN	NaN	NaN	NaN	NaN	NaN	NaN	4.0757	1	4.0757	3.5757	4.5757	0								0	0	0	5.8943e-21
ITDNMLCAGTK	11	1	0	Oxidation (M)	_ITDNM(ox)LCAGTK_	ITDNM(1)LCAGTK	ITDNM(89.7)LCAGTK	0	1	0	sp|Q9UKR3-2|KLK13_HUMAN;sp|Q9UKR3|KLK13_HUMAN	sp|Q9UKR3-2|KLK13_HUMAN	sp|Q9UKR3-2|KLK13_HUMAN	ISO-MSMS	1	16062020_SKO_IP_Cep78	1	exp_1	622.303	2	620.289	1238.56	NaN	NaN	NaN	0.90193	0.00055946	NaN	NaN	NaN	NaN	NaN	12.582	0.2191	12.582	12.479	12.698	0								0	0	0	0.0094667
ITITNDK	7	1	0	Unmodified	_ITITNDK_			0	0	0	sp|P11142|HSP7C_HUMAN;sp|P54652|HSP72_HUMAN;sp|P0DMV9|HS71B_HUMAN;sp|P0DMV8|HS71A_HUMAN;sp|P0DMV8-2|HS71A_HUMAN;sp|P34931|HS71L_HUMAN;sp|P17066|HSP76_HUMAN	sp|P11142|HSP7C_HUMAN;sp|P0DMV9|HS71B_HUMAN;sp|P17066|HSP76_HUMAN	sp|P0DMV9|HS71B_HUMAN	ISO-MSMS	2	16062020_SKO_IP_Cep78	1	exp_1	407.258	2	402.727	803.439	NaN	NaN	NaN	0.24717	9.9544e-05	NaN	NaN	NaN	NaN	NaN	10.026	0.77396	10.026	9.4822	10.256	0								0	0	0	4.3965e-05
ITITNDK	7	1	0	Unmodified	_ITITNDK_			0	0	0	sp|P11142|HSP7C_HUMAN;sp|P54652|HSP72_HUMAN;sp|P0DMV9|HS71B_HUMAN;sp|P0DMV8|HS71A_HUMAN;sp|P0DMV8-2|HS71A_HUMAN;sp|P34931|HS71L_HUMAN;sp|P17066|HSP76_HUMAN	sp|P11142|HSP7C_HUMAN;sp|P0DMV9|HS71B_HUMAN;sp|P17066|HSP76_HUMAN	sp|P0DMV9|HS71B_HUMAN	ISO-MSMS	0	16062020_SKO_IP_Cep78	1	exp_1	402.728	2	402.727	803.439	NaN	NaN	NaN	0.010267	4.1347e-06	NaN	NaN	NaN	NaN	NaN	10.466	0.38766	10.466	10.29	10.678	-1.7764e-15								0	0	0	0.0082316
ITITNDK	7	1	0	Unmodified	_ITITNDK_			0	0	0	sp|P11142|HSP7C_HUMAN;sp|P54652|HSP72_HUMAN;sp|P0DMV9|HS71B_HUMAN;sp|P0DMV8|HS71A_HUMAN;sp|P0DMV8-2|HS71A_HUMAN;sp|P34931|HS71L_HUMAN;sp|P17066|HSP76_HUMAN	sp|P11142|HSP7C_HUMAN;sp|P0DMV9|HS71B_HUMAN;sp|P17066|HSP76_HUMAN	sp|P0DMV9|HS71B_HUMAN	MSMS	2	16062020_SKO_IP_Cep78	1	exp_1	406.734	2	402.727	803.439	NaN	NaN	NaN	NaN	NaN	NaN	NaN	NaN	NaN	NaN	10.587	1	10.587	10.087	11.087	0								0	0	0	4.3656e-05
ITITNDQNR	9	0	1	Unmodified	_ITITNDQNR_			0	0	0	sp|P11021|GRP78_HUMAN	sp|P11021|GRP78_HUMAN	sp|P11021|GRP78_HUMAN	MULTI-MSMS		16062020_SKO_IP_Cep78	1	exp_1	540.793	2	537.781	1073.55	38883	1.1167	0.00060055	1.7095	0.00091933	2.8262	0.0015199	537.782	540.792	542.786	13.088	0.20204	13.088	12.985	13.187	0					63	11	9	0	0	0	6.6303e-08
IVNLGSSK	8	1	0	Unmodified	_IVNLGSSK_			0	0	0	sp|Q7RTV0|PHF5A_HUMAN	sp|Q7RTV0|PHF5A_HUMAN	sp|Q7RTV0|PHF5A_HUMAN	MULTI-MSMS		16062020_SKO_IP_Cep78	1	exp_1	409.245	2	409.243	816.471	43605.9	1.8825	0.00077039	-0.016173	-6.6185e-06	1.8663	0.00076377	409.243	411.255	413.25	13.118	0.30329	13.118	12.934	13.237	0					114	17	9	0	0	0	2.5936e-24
IVTDRETGSSK	11	1	1	Unmodified	_IVTDRETGSSK_			0	0	1	sp|P19338|NUCL_HUMAN	sp|P19338|NUCL_HUMAN	sp|P19338|NUCL_HUMAN	ISO-MSMS	2	16062020_SKO_IP_Cep78	1	exp_1	605.823	2	596.812	1191.61	NaN	NaN	NaN	-0.28346	-0.00016917	NaN	NaN	NaN	NaN	NaN	5.9243	0.067048	5.9243	5.8824	5.9494	0								0	0	0	1.4802e-51
IVYLYTK	7	1	0	Unmodified	_IVYLYTK_			0	0	0	sp|P49207|RL34_HUMAN	sp|P49207|RL34_HUMAN	sp|P49207|RL34_HUMAN	MULTI-MSMS		16062020_SKO_IP_Cep78	1	exp_1	450.268	2	450.265	898.516	41342.9	0.94253	0.00042439	0.581	0.00026161	1.5235	0.000686	450.266	452.278	454.273	27.882	0.43915	27.882	27.681	28.12	0					186	25	11	0	0	0	6.5649e-09
IYVLLRR	7	0	2	Unmodified	_IYVLLRR_			0	0	1	sp|P84090|ERH_HUMAN	sp|P84090|ERH_HUMAN	sp|P84090|ERH_HUMAN	ISO-MSMS	2	16062020_SKO_IP_Cep78	1	exp_1	476.814	2	466.806	931.597	NaN	NaN	NaN	-0.21056	-9.829e-05	NaN	NaN	NaN	NaN	NaN	26.554	0.45685	26.554	26.346	26.803	0								0	0	0	0.017921
KAEGEPQEESPLK	13	2	0	Unmodified	_KAEGEPQEESPLK_			0	0	1	sp|Q9NYF8-3|BCLF1_HUMAN;sp|Q9NYF8-2|BCLF1_HUMAN;sp|Q9NYF8|BCLF1_HUMAN;sp|Q9NYF8-4|BCLF1_HUMAN	sp|Q9NYF8-3|BCLF1_HUMAN	sp|Q9NYF8-3|BCLF1_HUMAN	ISO-MSMS	0	16062020_SKO_IP_Cep78	1	exp_1	721.364	2	721.362	1440.71	NaN	NaN	NaN	0.45669	0.00032944	NaN	NaN	NaN	NaN	NaN	12.963	0.25288	12.963	12.85	13.103	0								0	0	0	0.011343
KEETQPPVALK	11	2	0	Unmodified	_KEETQPPVALK_			0	0	1	sp|Q8NC51-4|PAIRB_HUMAN;sp|Q8NC51-3|PAIRB_HUMAN;sp|Q8NC51-2|PAIRB_HUMAN;sp|Q8NC51|PAIRB_HUMAN	sp|Q8NC51-4|PAIRB_HUMAN	sp|Q8NC51-4|PAIRB_HUMAN	ISO-MSMS	0	16062020_SKO_IP_Cep78	1	exp_1	620.353	2	620.351	1238.69	NaN	NaN	NaN	1.9701	0.0012221	NaN	NaN	NaN	NaN	NaN	15.539	0.16838	15.539	15.439	15.607	0								0	0	0	0.0011922
KFDDFQK	7	2	0	Unmodified	_KFDDFQK_			0	0	1	sp|Q13813-3|SPTN1_HUMAN;sp|Q13813|SPTN1_HUMAN;sp|Q13813-2|SPTN1_HUMAN	sp|Q13813-3|SPTN1_HUMAN	sp|Q13813-3|SPTN1_HUMAN	ISO-MSMS	2	16062020_SKO_IP_Cep78	1	exp_1	472.248	2	464.232	926.45	NaN	NaN	NaN	1.8698	0.00086803	NaN	NaN	NaN	NaN	NaN	13.772	0.30249	13.772	13.64	13.943	0								0	0	0	0.0082015
KFDDFQK	7	2	0	Unmodified	_KFDDFQK_			0	0	1	sp|Q13813-3|SPTN1_HUMAN;sp|Q13813|SPTN1_HUMAN;sp|Q13813-2|SPTN1_HUMAN	sp|Q13813-3|SPTN1_HUMAN	sp|Q13813-3|SPTN1_HUMAN	ISO-MSMS	0	16062020_SKO_IP_Cep78	1	exp_1	464.234	2	464.232	926.45	NaN	NaN	NaN	-0.43807	-0.00020337	NaN	NaN	NaN	NaN	NaN	13.772	0.21861	13.772	13.64	13.859	0								0	0	0	0.0041048
KFGDPVVQSDMK	12	2	0	Oxidation (M)	_KFGDPVVQSDM(ox)K_	KFGDPVVQSDM(1)K	KFGDPVVQSDM(101.53)K	0	1	1	sp|P0DMV9|HS71B_HUMAN;sp|P0DMV8|HS71A_HUMAN;sp|P0DMV8-2|HS71A_HUMAN	sp|P0DMV9|HS71B_HUMAN	sp|P0DMV9|HS71B_HUMAN	ISO-MSMS	0	16062020_SKO_IP_Cep78	1	exp_1	683.837	2	683.837	1365.66	NaN	NaN	NaN	-2.0349	-0.0013915	NaN	NaN	NaN	NaN	NaN	16.46	0.37058	16.46	16.281	16.651	0								0	0	0	0.00059749
KGDIVDIK	8	2	0	Unmodified	_KGDIVDIK_			0	0	1	sp|P46778|RL21_HUMAN	sp|P46778|RL21_HUMAN	sp|P46778|RL21_HUMAN	MULTI-MSMS		16062020_SKO_IP_Cep78	1	exp_1	444.264	2	444.263	886.512	42176.3	-0.18075	-8.03e-05	-0.32217	-0.00014313	-0.50292	-0.00022343	444.263	448.289	452.277	14.586	0.23362	14.586	14.463	14.697	0					69	13	7	0	0	0	5.0874e-74
KGDLLLNR	8	1	1	Unmodified	_KGDLLLNR_			0	0	1	sp|Q15008-3|PSMD6_HUMAN;sp|Q15008-2|PSMD6_HUMAN;sp|Q15008|PSMD6_HUMAN;sp|Q15008-4|PSMD6_HUMAN	sp|Q15008-3|PSMD6_HUMAN	sp|Q15008-3|PSMD6_HUMAN	ISO-MSMS	0	16062020_SKO_IP_Cep78	1	exp_1	464.783	2	464.782	927.55	NaN	NaN	NaN	-0.042419	-1.9716e-05	NaN	NaN	NaN	NaN	NaN	16.828	0.15201	16.828	16.735	16.887	0								0	0	0	0.01881
KGFPVLSK	8	2	0	Unmodified	_KGFPVLSK_			0	0	1	sp|O14744-5|ANM5_HUMAN;sp|O14744|ANM5_HUMAN;sp|O14744-3|ANM5_HUMAN;sp|O14744-2|ANM5_HUMAN	sp|O14744-5|ANM5_HUMAN	sp|O14744-5|ANM5_HUMAN	MULTI-MSMS		16062020_SKO_IP_Cep78	1	exp_1	446.287	2	438.271	874.528	42865.1	0.59135	0.00025917	0.31474	0.00013794	0.9061	0.00039712	438.271	442.296	446.286	19.108	0.7741	19.108	18.572	19.346	0					259	45	9	0	0	0	0.0048234
KHLEDEL	7	1	0	Unmodified	_KHLEDEL_			0	0	1	sp|O95881|TXD12_HUMAN	sp|O95881|TXD12_HUMAN	sp|O95881|TXD12_HUMAN	MULTI-MSMS		16062020_SKO_IP_Cep78	1	exp_1	442.23	2	442.23	882.445	41354.6	1.3359	0.00059075	-0.28311	-0.0001252	1.0527	0.00046555	442.23	444.242	446.237	14.126	0.26866	14.126	13.993	14.262	0					95	15	10	0	0	0	0.0078967
KPGDLSDELR	10	1	1	Unmodified	_KPGDLSDELR_			0	0	1	sp|Q13435|SF3B2_HUMAN	sp|Q13435|SF3B2_HUMAN	sp|Q13435|SF3B2_HUMAN	ISO-MSMS	0	16062020_SKO_IP_Cep78	1	exp_1	565.299	2	565.296	1128.58	NaN	NaN	NaN	0.42392	0.00023964	NaN	NaN	NaN	NaN	NaN	18.952	0.28637	18.952	18.79	19.077	0								0	0	0	0.0064596
KPGDLSDELR	10	1	1	Unmodified	_KPGDLSDELR_			0	0	1	sp|Q13435|SF3B2_HUMAN	sp|Q13435|SF3B2_HUMAN	sp|Q13435|SF3B2_HUMAN	ISO-MSMS	2	16062020_SKO_IP_Cep78	1	exp_1	574.309	2	565.296	1128.58	NaN	NaN	NaN	0.39553	0.00022359	NaN	NaN	NaN	NaN	NaN	18.949	0.32001	18.949	18.74	19.06	0								0	0	0	0.0037219
KPGDLSDELR	10	1	1	Unmodified	_KPGDLSDELR_			0	0	1	sp|Q13435|SF3B2_HUMAN	sp|Q13435|SF3B2_HUMAN	sp|Q13435|SF3B2_HUMAN	ISO-MSMS	1	16062020_SKO_IP_Cep78	1	exp_1	570.322	2	565.296	1128.58	NaN	NaN	NaN	3.8019	0.0021492	NaN	NaN	NaN	NaN	NaN	18.946	0.21919	18.946	18.824	19.043	0								0	0	0	0.010058
KQTALVELLK	10	2	0	Unmodified	_KQTALVELLK_			0	0	1	CON__P02769	CON__P02769	CON__P02769	ISO-MSMS	0	16062020_SKO_IP_Cep78	1	exp_1	571.862	2	571.861	1141.71	NaN	NaN	NaN	-2.9544	-0.0016895	NaN	NaN	NaN	NaN	NaN	36.713	0.34209	36.713	36.418	36.76	0								0	0	0	0.0086548
KQTALVELVK	10	2	0	Unmodified	_KQTALVELVK_			0	0	1	sp|P02768|ALBU_HUMAN;CON__P02768-1;sp|P02768-3|ALBU_HUMAN;sp|P02768-2|ALBU_HUMAN	sp|P02768|ALBU_HUMAN	sp|P02768|ALBU_HUMAN	ISO-MSMS	0	16062020_SKO_IP_Cep78	1	exp_1	564.854	2	564.853	1127.69	NaN	NaN	NaN	-0.87191	-0.0004925	NaN	NaN	NaN	NaN	NaN	25.941	0.22017	25.941	25.855	26.075	0								0	0	0	0.0067696
KSDVEAIFSK	10	2	0	Unmodified	_KSDVEAIFSK_			0	0	1	sp|P07910-4|HNRPC_HUMAN;sp|P0DMR1|HNRC4_HUMAN;sp|P07910-2|HNRPC_HUMAN;sp|O60812|HNRC1_HUMAN;sp|B7ZW38|HNRC3_HUMAN;sp|B2RXH8|HNRC2_HUMAN;sp|P07910|HNRPC_HUMAN	sp|P07910-4|HNRPC_HUMAN	sp|P07910-4|HNRPC_HUMAN	ISO-MSMS	2	16062020_SKO_IP_Cep78	1	exp_1	570.77	2	562.303	1122.59	NaN	NaN	NaN	1.0765	0.00060531	NaN	NaN	NaN	NaN	NaN	26.896	0.33801	26.896	26.735	27.073	-3.5527e-15								0	0	0	0.0095033
KSDVEAIFSK	10	2	0	Unmodified	_KSDVEAIFSK_			0	0	1	sp|P07910-4|HNRPC_HUMAN;sp|P0DMR1|HNRC4_HUMAN;sp|P07910-2|HNRPC_HUMAN;sp|O60812|HNRC1_HUMAN;sp|B7ZW38|HNRC3_HUMAN;sp|B2RXH8|HNRC2_HUMAN;sp|P07910|HNRPC_HUMAN	sp|P07910-4|HNRPC_HUMAN	sp|P07910-4|HNRPC_HUMAN	ISO-MSMS	0	16062020_SKO_IP_Cep78	1	exp_1	562.303	2	562.303	1122.59	NaN	NaN	NaN	-0.54789	-0.00030808	NaN	NaN	NaN	NaN	NaN	26.9	0.38884	26.9	26.735	27.124	0								0	0	0	0.013727
KVAPAPAVVK	10	2	0	Unmodified	_KVAPAPAVVK_			0	0	1	sp|P62424|RL7A_HUMAN	sp|P62424|RL7A_HUMAN	sp|P62424|RL7A_HUMAN	ISO-MSMS	0	16062020_SKO_IP_Cep78	1	exp_1	490.821	2	490.319	978.623	NaN	NaN	NaN	-0.15435	-7.568e-05	NaN	NaN	NaN	NaN	NaN	9.1155	0.11056	9.1155	9.0555	9.1661	0								0	0	0	0.0035826
KVAPAPAVVK	10	2	0	Unmodified	_KVAPAPAVVK_			0	0	1	sp|P62424|RL7A_HUMAN	sp|P62424|RL7A_HUMAN	sp|P62424|RL7A_HUMAN	ISO-MSMS	2	16062020_SKO_IP_Cep78	1	exp_1	498.335	2	490.319	978.623	NaN	NaN	NaN	1.92	0.00094142	NaN	NaN	NaN	NaN	NaN	9.1209	0.11056	9.1209	9.0555	9.1661	0								0	0	0	0.017648
KVGIVGK	7	2	0	Unmodified	_KVGIVGK_			0	0	1	sp|P61513|RL37A_HUMAN	sp|P61513|RL37A_HUMAN	sp|P61513|RL37A_HUMAN	ISO-MSMS	2	16062020_SKO_IP_Cep78	1	exp_1	358.754	2	350.739	699.464	NaN	NaN	NaN	0.13637	4.7831e-05	NaN	NaN	NaN	NaN	NaN	6.2092	0.083763	6.2092	6.1674	6.2511	0								0	0	0	0.027811
KVGIVGK	7	2	0	Unmodified	_KVGIVGK_			0	0	1	sp|P61513|RL37A_HUMAN	sp|P61513|RL37A_HUMAN	sp|P61513|RL37A_HUMAN	ISO-MSMS	0	16062020_SKO_IP_Cep78	1	exp_1	350.74	2	350.739	699.464	NaN	NaN	NaN	-0.48504	-0.00017012	NaN	NaN	NaN	NaN	NaN	6.2099	0.13401	6.2099	6.1506	6.2846	0								0	0	0	0.00087668
KVVNPLFEK	9	2	0	Unmodified	_KVVNPLFEK_			0	0	1	sp|P62424|RL7A_HUMAN	sp|P62424|RL7A_HUMAN	sp|P62424|RL7A_HUMAN	ISO-MSMS	2	16062020_SKO_IP_Cep78	1	exp_1	544.836	2	537.321	1072.63	NaN	NaN	NaN	0.70749	0.00038015	NaN	NaN	NaN	NaN	NaN	23.07	0.35179	23.07	22.879	23.231	0								0	0	0	0.0058429
LALSQNQQSSGAAGPTGK	18	1	0	Unmodified	_LALSQNQQSSGAAGPTGK_			0	0	0	sp|O95232|LC7L3_HUMAN	sp|O95232|LC7L3_HUMAN	sp|O95232|LC7L3_HUMAN	ISO-MSMS	0	16062020_SKO_IP_Cep78	1	exp_1	858.439	2	857.94	1713.86	NaN	NaN	NaN	-4.1737	-0.0035808	NaN	NaN	NaN	NaN	NaN	17.098	0.25272	17.098	17.005	17.258	0								0	0	0	3.9188e-13
LAPGGHVGR	9	0	1	Unmodified	_LAPGGHVGR_			0	0	0	sp|P36578|RL4_HUMAN	sp|P36578|RL4_HUMAN	sp|P36578|RL4_HUMAN	ISO-MSMS	0	16062020_SKO_IP_Cep78	1	exp_1	432.246	2	432.246	862.477	NaN	NaN	NaN	0.2863	0.00012375	NaN	NaN	NaN	NaN	NaN	6.1713	0.067007	6.1713	6.1171	6.1841	-8.8818e-16								0	0	0	0.025663
LAQFVAR	7	0	1	Unmodified	_LAQFVAR_			0	0	0	sp|Q8IWX8|CHERP_HUMAN	sp|Q8IWX8|CHERP_HUMAN	sp|Q8IWX8|CHERP_HUMAN	MULTI-MSMS		16062020_SKO_IP_Cep78	1	exp_1	402.74	2	402.74	803.465	43377.1	0.74875	0.00030155	-0.32534	-0.00013103	0.4234	0.00017052	402.74	405.75	407.744	19.015	0.2692	19.015	18.875	19.144	0					103	15	10	0	0	0	1.6475e-56
LAQIQQAK	8	1	0	Unmodified	_LAQIQQAK_			0	0	0	sp|O95793-2|STAU1_HUMAN;sp|O95793-3|STAU1_HUMAN;sp|O95793|STAU1_HUMAN;sp|Q9NUL3-4|STAU2_HUMAN;sp|Q9NUL3-6|STAU2_HUMAN;sp|Q9NUL3-8|STAU2_HUMAN;sp|Q9NUL3-3|STAU2_HUMAN;sp|Q9NUL3-7|STAU2_HUMAN;sp|Q9NUL3-2|STAU2_HUMAN;sp|Q9NUL3|STAU2_HUMAN	sp|O95793-2|STAU1_HUMAN	sp|O95793-2|STAU1_HUMAN	ISO-MSMS	0	16062020_SKO_IP_Cep78	1	exp_1	450.27	2	450.269	898.524	NaN	NaN	NaN	0.57478	0.0002588	NaN	NaN	NaN	NaN	NaN	9.3765	0.19865	9.3765	9.25	9.4486	0								0	0	0	0.018767
LAQIQQAK	8	1	0	Unmodified	_LAQIQQAK_			0	0	0	sp|O95793-2|STAU1_HUMAN;sp|O95793-3|STAU1_HUMAN;sp|O95793|STAU1_HUMAN;sp|Q9NUL3-4|STAU2_HUMAN;sp|Q9NUL3-6|STAU2_HUMAN;sp|Q9NUL3-8|STAU2_HUMAN;sp|Q9NUL3-3|STAU2_HUMAN;sp|Q9NUL3-7|STAU2_HUMAN;sp|Q9NUL3-2|STAU2_HUMAN;sp|Q9NUL3|STAU2_HUMAN	sp|O95793-2|STAU1_HUMAN	sp|O95793-2|STAU1_HUMAN	ISO-MSMS	2	16062020_SKO_IP_Cep78	1	exp_1	454.777	2	450.269	898.524	NaN	NaN	NaN	1.5397	0.00069326	NaN	NaN	NaN	NaN	NaN	9.3679	0.21543	9.3679	9.25	9.4654	0								0	0	0	0.018967
LASYLDK	7	1	0	Unmodified	_LASYLDK_			0	0	0	sp|P35527|K1C9_HUMAN;CON__P35527;sp|P08727|K1C19_HUMAN;CON__P08727;CON__P19001;CON__P05784;CON__P08730-1;sp|P19012|K1C15_HUMAN;CON__P19012;sp|Q99456|K1C12_HUMAN;CON__Q99456;sp|P02533|K1C14_HUMAN;CON__P02533;sp|Q04695|K1C17_HUMAN;CON__Q04695;CON__Q9QWL7;CON__A2A4G1;sp|P08779|K1C16_HUMAN;CON__P08779;sp|P13645|K1C10_HUMAN;CON__P13645	sp|P35527|K1C9_HUMAN;sp|P02533|K1C14_HUMAN;sp|P08779|K1C16_HUMAN;sp|P13645|K1C10_HUMAN	sp|P35527|K1C9_HUMAN	ISO-MSMS	0	16062020_SKO_IP_Cep78	1	exp_1	405.224	2	405.224	808.433	NaN	NaN	NaN	-0.35468	-0.00014373	NaN	NaN	NaN	NaN	NaN	17.401	0.42205	17.401	17.173	17.595	0								0	0	0	0.025089
LAYIAHPK	8	1	0	Unmodified	_LAYIAHPK_			0	0	0	sp|P47914|RL29_HUMAN	sp|P47914|RL29_HUMAN	sp|P47914|RL29_HUMAN	MULTI-MSMS		16062020_SKO_IP_Cep78	1	exp_1	460.776	2	456.769	911.523	41292	1.7385	0.00079409	-0.18423	-8.415e-05	1.5543	0.00070994	456.769	458.781	460.776	12.692	0.3036	12.692	12.563	12.867	0					113	17	10	0	0	0	0.0085044
LDELRDEGK	9	1	1	Unmodified	_LDELRDEGK_			0	0	1	sp|P02768|ALBU_HUMAN;CON__P02768-1	sp|P02768|ALBU_HUMAN	sp|P02768|ALBU_HUMAN	ISO-MSMS	0	16062020_SKO_IP_Cep78	1	exp_1	537.775	2	537.775	1073.54	NaN	NaN	NaN	-0.11751	-6.3193e-05	NaN	NaN	NaN	NaN	NaN	10.081	0.26914	10.081	9.9535	10.223	0								0	0	0	0.019665
LDGTEINGR	9	0	1	Unmodified	_LDGTEINGR_			0	0	0	sp|Q13247-3|SRSF6_HUMAN;sp|Q13247|SRSF6_HUMAN	sp|Q13247-3|SRSF6_HUMAN	sp|Q13247-3|SRSF6_HUMAN	MSMS	0	16062020_SKO_IP_Cep78	1	exp_1	487.749	2	487.749	973.483	NaN	NaN	NaN	NaN	NaN	NaN	NaN	NaN	NaN	NaN	14.425	1	14.425	13.925	14.925	0								0	0	0	0.0024277
LDHYAIIK	8	1	0	Unmodified	_LDHYAIIK_			0	0	0	sp|P62750|RL23A_HUMAN	sp|P62750|RL23A_HUMAN	sp|P62750|RL23A_HUMAN	MULTI-MSMS		16062020_SKO_IP_Cep78	1	exp_1	490.786	2	486.779	971.544	39167.7	0.5449	0.00026525	-1.2976	-0.00063163	-0.75267	-0.00036638	486.779	488.792	490.786	20.223	0.55622	20.223	19.835	20.391	-3.5527e-15					169	32	9	0	0	0	1.1202e-33
LDIPTGTTPQRK	12	1	1	Unmodified	_LDIPTGTTPQRK_			0	0	1	sp|P52732|KIF11_HUMAN	sp|P52732|KIF11_HUMAN	sp|P52732|KIF11_HUMAN	ISO-MSMS	0	16062020_SKO_IP_Cep78	1	exp_1	664.376	2	663.872	1325.73	NaN	NaN	NaN	1.4655	0.00097287	NaN	NaN	NaN	NaN	NaN	20.375	0.20256	20.375	20.256	20.459	0								0	0	0	0.00085626
LDQQTLPLGGR	11	0	1	Unmodified	_LDQQTLPLGGR_			0	0	0	sp|P98175-2|RBM10_HUMAN;sp|P98175|RBM10_HUMAN;sp|P98175-4|RBM10_HUMAN;sp|P98175-3|RBM10_HUMAN	sp|P98175-2|RBM10_HUMAN	sp|P98175-2|RBM10_HUMAN	ISO-MSMS	0	16062020_SKO_IP_Cep78	1	exp_1	599.332	2	599.333	1196.65	NaN	NaN	NaN	-1.4279	-0.0008558	NaN	NaN	NaN	NaN	NaN	31.781	0.22241	31.781	31.725	31.948	0								0	0	0	1.2082e-13
LEAALVK	7	1	0	Unmodified	_LEAALVK_			0	0	0	sp|Q9UQ35|SRRM2_HUMAN;sp|Q9UQ35-2|SRRM2_HUMAN	sp|Q9UQ35|SRRM2_HUMAN	sp|Q9UQ35|SRRM2_HUMAN	MULTI-MSMS		16062020_SKO_IP_Cep78	1	exp_1	372.237	2	372.237	742.459	44239.7	1.778	0.00066185	0.16854	6.2736e-05	1.9466	0.00072458	372.237	374.25	376.244	18.327	0.25322	18.327	18.184	18.437	0					68	14	8	0	0	0	0.002231
LEAELATAR	9	0	1	Unmodified	_LEAELATAR_			0	0	0	sp|Q4VCS5-2|AMOT_HUMAN;sp|Q4VCS5|AMOT_HUMAN	sp|Q4VCS5-2|AMOT_HUMAN	sp|Q4VCS5-2|AMOT_HUMAN	ISO-MSMS	1	16062020_SKO_IP_Cep78	1	exp_1	490.28	2	487.269	972.524	NaN	NaN	NaN	-0.37546	-0.00018295	NaN	NaN	NaN	NaN	NaN	19.001	0.6736	19.001	18.824	19.498	0								0	0	0	1.3966e-17
LEAELATAR	9	0	1	Unmodified	_LEAELATAR_			0	0	0	sp|Q4VCS5-2|AMOT_HUMAN;sp|Q4VCS5|AMOT_HUMAN	sp|Q4VCS5-2|AMOT_HUMAN	sp|Q4VCS5-2|AMOT_HUMAN	ISO-MSMS	0	16062020_SKO_IP_Cep78	1	exp_1	487.27	2	487.269	972.524	NaN	NaN	NaN	-0.56366	-0.00027466	NaN	NaN	NaN	NaN	NaN	19.001	0.8084	19.001	18.672	19.481	0								0	0	0	0.0081427
LEDLLRK	7	1	1	Unmodified	_LEDLLRK_			0	0	1	sp|P12956-2|XRCC6_HUMAN;sp|P12956|XRCC6_HUMAN	sp|P12956-2|XRCC6_HUMAN	sp|P12956-2|XRCC6_HUMAN	ISO-MSMS	0	16062020_SKO_IP_Cep78	1	exp_1	443.773	2	443.771	885.528	NaN	NaN	NaN	0.96966	0.00043031	NaN	NaN	NaN	NaN	NaN	18.66	0.25244	18.66	18.504	18.757	0								0	0	0	0.017528
LEEETEEDEEEK	12	1	0	Unmodified	_LEEETEEDEEEK_			0	0	0	sp|Q8N954-2|GPT11_HUMAN;sp|Q8N954|GPT11_HUMAN	sp|Q8N954-2|GPT11_HUMAN	sp|Q8N954-2|GPT11_HUMAN	MSMS	2	16062020_SKO_IP_Cep78	1	exp_1	758.819	2	754.81	1507.6	NaN	NaN	NaN	NaN	NaN	NaN	NaN	NaN	NaN	NaN	10.936	1	10.936	10.436	11.436	0								0	0	0	0.0152
LEGEIRR	7	0	2	Unmodified	_LEGEIRR_			0	0	1	sp|Q4VCS5-2|AMOT_HUMAN;sp|Q4VCS5|AMOT_HUMAN;sp|Q8IY63-2|AMOL1_HUMAN;sp|Q8IY63|AMOL1_HUMAN	sp|Q4VCS5-2|AMOT_HUMAN	sp|Q4VCS5-2|AMOT_HUMAN	ISO-MSMS	1	16062020_SKO_IP_Cep78	1	exp_1	442.771	2	436.751	871.488	NaN	NaN	NaN	-0.73632	-0.00032159	NaN	NaN	NaN	NaN	NaN	6.4941	0.21789	6.4941	6.3684	6.5863	-8.8818e-16								0	0	0	0.0081932
LFVGGLK	7	1	0	Unmodified	_LFVGGLK_			0	0	0	sp|Q13151|ROA0_HUMAN	sp|Q13151|ROA0_HUMAN	sp|Q13151|ROA0_HUMAN	MULTI-MSMS		16062020_SKO_IP_Cep78	1	exp_1	367.235	2	367.234	732.453	45451.1	2.0916	0.0007681	-0.33162	-0.00012178	1.76	0.00064631	367.234	369.246	371.241	26.844	1.1149	26.844	26.566	27.681	0					227	65	11	0	0	0	0.023398
LGDTQQSIPGNEER	14	0	1	Unmodified	_LGDTQQSIPGNEER_			0	0	0	sp|P19474|RO52_HUMAN;sp|P19474-2|RO52_HUMAN	sp|P19474|RO52_HUMAN	sp|P19474|RO52_HUMAN	ISO-MSMS	0	16062020_SKO_IP_Cep78	1	exp_1	772.876	2	772.371	1542.73	NaN	NaN	NaN	1.2667	0.00097837	NaN	NaN	NaN	NaN	NaN	18.216	0.23637	18.216	18.116	18.353	-3.5527e-15								0	0	0	4.417e-05
LGEYGFQNALIVR	13	0	1	Unmodified	_LGEYGFQNALIVR_			0	0	0	CON__P02769	CON__P02769	CON__P02769	ISO-MSMS	0	16062020_SKO_IP_Cep78	1	exp_1	740.31	2	740.401	1478.79	NaN	NaN	NaN	0.56195	0.00041607	NaN	NaN	NaN	NaN	NaN	59.927	0.9315	59.927	59.473	60.405	0								0	0	0	0.00080785
LGLELGK	7	1	0	Unmodified	_LGLELGK_			0	0	0	sp|P60891|PRPS1_HUMAN;sp|P21108|PRPS3_HUMAN;sp|P11908|PRPS2_HUMAN;sp|P11908-2|PRPS2_HUMAN	sp|P60891|PRPS1_HUMAN	sp|P60891|PRPS1_HUMAN	MULTI-MSMS		16062020_SKO_IP_Cep78	1	exp_1	369.237	2	365.229	728.443	45554.5	1.7663	0.00064509	0.31362	0.00011454	2.0799	0.00075963	365.229	367.242	369.236	30.8	0.4923	30.8	30.589	31.081	0					146	28	10	0	0	0	0.02376
LGNDFHTNK	9	1	0	Unmodified	_LGNDFHTNK_			0	0	0	sp|P08708|RS17_HUMAN	sp|P08708|RS17_HUMAN	sp|P08708|RS17_HUMAN	MSMS	2	16062020_SKO_IP_Cep78	1	exp_1	527.26	2	523.257	1044.5	NaN	NaN	NaN	NaN	NaN	NaN	NaN	NaN	NaN	NaN	7.6175	1	7.6175	7.1175	8.1175	0								0	0	0	3.7724e-15
LGNDFHTNK	9	1	0	Unmodified	_LGNDFHTNK_			0	0	0	sp|P08708|RS17_HUMAN	sp|P08708|RS17_HUMAN	sp|P08708|RS17_HUMAN	MSMS	0	16062020_SKO_IP_Cep78	1	exp_1	523.257	2	523.257	1044.5	NaN	NaN	NaN	NaN	NaN	NaN	NaN	NaN	NaN	NaN	7.6327	1	7.6327	7.1327	8.1327	0								0	0	0	2.8884e-42
LHDAFFK	7	1	0	Unmodified	_LHDAFFK_			0	0	0	sp|Q13435|SF3B2_HUMAN	sp|Q13435|SF3B2_HUMAN	sp|Q13435|SF3B2_HUMAN	MULTI-MSMS		16062020_SKO_IP_Cep78	1	exp_1	439.233	2	439.232	876.449	41641.8	0.52421	0.00023025	0.021615	9.4941e-06	0.54583	0.00023975	439.232	441.244	443.239	20.282	0.35441	20.282	20.121	20.475	0					133	20	10	0	0	0	1.8928e-22
LIGEYGLR	8	0	1	Unmodified	_LIGEYGLR_			0	0	0	sp|P46781|RS9_HUMAN	sp|P46781|RS9_HUMAN	sp|P46781|RS9_HUMAN	ISO-MSMS	0	16062020_SKO_IP_Cep78	1	exp_1	460.766	2	460.764	919.513	NaN	NaN	NaN	1.7522	0.00080735	NaN	NaN	NaN	NaN	NaN	32.26	0.51114	32.26	32.033	32.544	0								0	0	0	0.022117
LITEDVQGK	9	1	0	Unmodified	_LITEDVQGK_			0	0	0	sp|P61247|RS3A_HUMAN	sp|P61247|RS3A_HUMAN	sp|P61247|RS3A_HUMAN	MULTI-MSMS		16062020_SKO_IP_Cep78	1	exp_1	501.777	2	501.777	1001.54	38971.2	2.4389	0.0012238	-1.2993	-0.00065194	1.1396	0.00057183	501.776	503.789	505.784	17.452	0.4893	17.452	17.258	17.747	0					165	28	12	0	0	0	2.1346e-37
LLADQAEAR	9	0	1	Unmodified	_LLADQAEAR_			0	0	0	sp|P84098|RL19_HUMAN	sp|P84098|RL19_HUMAN	sp|P84098|RL19_HUMAN	ISO-MSMS	0	16062020_SKO_IP_Cep78	1	exp_1	493.767	2	493.767	985.519	NaN	NaN	NaN	1.5199	0.00075046	NaN	NaN	NaN	NaN	NaN	14.806	0.35232	14.806	14.664	15.017	0								0	0	0	0.012489
LLADQAEAR	9	0	1	Unmodified	_LLADQAEAR_			0	0	0	sp|P84098|RL19_HUMAN	sp|P84098|RL19_HUMAN	sp|P84098|RL19_HUMAN	ISO-MSMS	1	16062020_SKO_IP_Cep78	1	exp_1	496.776	2	493.767	985.519	NaN	NaN	NaN	0.66296	0.00032735	NaN	NaN	NaN	NaN	NaN	14.806	0.20207	14.806	14.697	14.899	0								0	0	0	0.010558
LLADQAEAR	9	0	1	Unmodified	_LLADQAEAR_			0	0	0	sp|P84098|RL19_HUMAN	sp|P84098|RL19_HUMAN	sp|P84098|RL19_HUMAN	MSMS	2	16062020_SKO_IP_Cep78	1	exp_1	498.772	2	493.767	985.519	NaN	NaN	NaN	NaN	NaN	NaN	NaN	NaN	NaN	NaN	14.758	1	14.758	14.258	15.258	0								0	0	0	1.164e-13
LLDAAYK	7	1	0	Unmodified	_LLDAAYK_			0	0	0	sp|Q9UIW2|PLXA1_HUMAN	sp|Q9UIW2|PLXA1_HUMAN	sp|Q9UIW2|PLXA1_HUMAN	MULTI-MSMS		16062020_SKO_IP_Cep78	1	exp_1	397.729	2	397.226	792.438	43750.9	1.2563	0.00049905	0.13219	5.2509e-05	1.3885	0.00055156	397.226	399.239	401.233	16.862	0.63989	16.862	16.618	17.258	-3.5527e-15					180	37	9	0	0	0	0.0063773
LLERSPL	7	0	1	Unmodified	_LLERSPL_			0	0	1	sp|Q8WVV9-2|HNRLL_HUMAN	sp|Q8WVV9-2|HNRLL_HUMAN	sp|Q8WVV9-2|HNRLL_HUMAN	MULTI-SECPEP		16062020_SKO_IP_Cep78	1	exp_1	414.219	2	414.253	826.491	42442	2.584	0.0010704	1.2685	0.00052547	3.8524	0.0015959	414.254	417.262	419.258	24.865	0.55948	24.865	24.568	25.128	3.5527e-15					224	32	11	0	0	0	0.00048709
LLNTVEETTK	10	1	0	Unmodified	_LLNTVEETTK_			0	0	0	sp|P52732|KIF11_HUMAN	sp|P52732|KIF11_HUMAN	sp|P52732|KIF11_HUMAN	MULTI-MSMS		16062020_SKO_IP_Cep78	1	exp_1	576.328	2	574.314	1146.61	36969.3	1.0104	0.00058029	1.1774	0.00067619	2.1878	0.0012565	574.315	576.327	578.322	18.707	0.3368	18.707	18.538	18.875	0					157	19	12	0	0	0	4.3618e-50
LLQDFFNGK	9	1	0	Unmodified	_LLQDFFNGK_			0	0	0	sp|P11142|HSP7C_HUMAN;sp|P11142-2|HSP7C_HUMAN;sp|P54652|HSP72_HUMAN;sp|P17066|HSP76_HUMAN	sp|P11142|HSP7C_HUMAN;sp|P17066|HSP76_HUMAN	sp|P11142|HSP7C_HUMAN	MULTI-MSMS		16062020_SKO_IP_Cep78	1	exp_1	541.792	2	541.287	1080.56	41616.8	1.3795	0.00074671	0.47986	0.00025974	1.8594	0.0010065	541.288	543.804	545.295	53.712	0.46225	53.712	53.479	53.942	-7.1054e-15					124	27	8	0	0	0	5.7473e-08
LLQSQLQVK	9	1	0	Unmodified	_LLQSQLQVK_			0	0	0	sp|Q96I25|SPF45_HUMAN	sp|Q96I25|SPF45_HUMAN	sp|Q96I25|SPF45_HUMAN	MULTI-MSMS		16062020_SKO_IP_Cep78	1	exp_1	528.826	2	528.824	1055.63	39098	2.4568	0.0012992	2.1445	0.0011341	4.6013	0.0024333	528.825	530.838	532.833	24.77	0.67834	24.77	24.5	25.179	0					154	39	9	0	0	0	9.7821e-28
LLSISGK	7	1	0	Unmodified	_LLSISGK_			0	0	0	sp|P06748-3|NPM_HUMAN;sp|P06748-2|NPM_HUMAN;sp|P06748|NPM_HUMAN	sp|P06748-3|NPM_HUMAN	sp|P06748-3|NPM_HUMAN	MULTI-MSMS		16062020_SKO_IP_Cep78	1	exp_1	363.236	2	359.229	716.443	46619.9	0.77571	0.00027866	0.092144	3.3101e-05	0.86785	0.00031176	359.229	361.241	363.236	20.231	0.74146	20.231	20.054	20.795	0					169	43	9	0	0	0	0.0025832
LNDLEDALQQAK	12	1	0	Unmodified	_LNDLEDALQQAK_			0	0	0	sp|P04264|K2C1_HUMAN;CON__P04264	sp|P04264|K2C1_HUMAN	sp|P04264|K2C1_HUMAN	ISO-MSMS	0	16062020_SKO_IP_Cep78	1	exp_1	679.853	2	679.352	1356.69	NaN	NaN	NaN	0.511	0.00034715	NaN	NaN	NaN	NaN	NaN	44.626	0.2543	44.626	44.539	44.793	-7.1054e-15								0	0	0	0.014465
LNGNLEK	7	1	0	Unmodified	_LNGNLEK_			0	0	0	sp|P52732|KIF11_HUMAN	sp|P52732|KIF11_HUMAN	sp|P52732|KIF11_HUMAN	MULTI-MSMS		16062020_SKO_IP_Cep78	1	exp_1	394.221	2	394.219	786.424	44477.2	0.37533	0.00014796	-0.66894	-0.00026371	-0.29361	-0.00011575	394.219	396.231	398.226	6.5611	0.083982	6.5611	6.5192	6.6032	0					22	4	7	0	0	0	2.0004e-31
LNTLLQR	7	0	1	Unmodified	_LNTLLQR_			0	0	0	sp|Q00839-2|HNRPU_HUMAN;sp|Q00839|HNRPU_HUMAN	sp|Q00839-2|HNRPU_HUMAN	sp|Q00839-2|HNRPU_HUMAN	MULTI-MSMS		16062020_SKO_IP_Cep78	1	exp_1	432.274	2	429.264	856.513	42311.3	0.7128	0.00030598	-0.35351	-0.00015175	0.35929	0.00015423	429.264	432.273	434.268	20.787	0.21854	20.787	20.695	20.913	0					49	14	10	0	0	0	3.1537e-09
LNVTDSVINK	10	1	0	Unmodified	_LNVTDSVINK_			0	0	0	sp|Q9BRS2|RIOK1_HUMAN	sp|Q9BRS2|RIOK1_HUMAN	sp|Q9BRS2|RIOK1_HUMAN	ISO-MSMS	0	16062020_SKO_IP_Cep78	1	exp_1	552.311	2	551.809	1101.6	NaN	NaN	NaN	0.3272	0.00018055	NaN	NaN	NaN	NaN	NaN	28.378	0.1656	28.378	28.272	28.437	0								0	0	0	0.011792
LQEEERER	8	0	2	Unmodified	_LQEEERER_			0	0	1	sp|P08708|RS17_HUMAN	sp|P08708|RS17_HUMAN	sp|P08708|RS17_HUMAN	ISO-MSMS	0	16062020_SKO_IP_Cep78	1	exp_1	544.769	2	544.77	1087.53	NaN	NaN	NaN	-1.1178	-0.00060893	NaN	NaN	NaN	NaN	NaN	1.4739	0.47244	1.4739	1.2361	1.7085	0								0	0	0	0.013837
LQEYLGK	7	1	0	Unmodified	_LQEYLGK_			0	0	0	sp|Q6PKG0-3|LARP1_HUMAN;sp|Q6PKG0|LARP1_HUMAN	sp|Q6PKG0-3|LARP1_HUMAN	sp|Q6PKG0-3|LARP1_HUMAN	MULTI-MSMS		16062020_SKO_IP_Cep78	1	exp_1	425.736	2	425.737	849.46	42639.5	1.5238	0.00064875	-0.81165	-0.00034555	0.71217	0.0003032	425.737	427.75	429.744	17.315	0.33765	17.315	17.123	17.461	-3.5527e-15					76	19	7	0	0	0	3.8246e-22
LQTASDESYK	10	1	0	Unmodified	_LQTASDESYK_			0	0	0	sp|Q13813-3|SPTN1_HUMAN;sp|Q13813|SPTN1_HUMAN;sp|Q13813-2|SPTN1_HUMAN	sp|Q13813-3|SPTN1_HUMAN	sp|Q13813-3|SPTN1_HUMAN	ISO-MSMS	0	16062020_SKO_IP_Cep78	1	exp_1	571.273	2	571.272	1140.53	NaN	NaN	NaN	1.8482	0.0010558	NaN	NaN	NaN	NaN	NaN	10.292	0.21855	10.292	10.189	10.408	0								0	0	0	0.015303
LRAEIDNVK	9	1	1	Unmodified	_LRAEIDNVK_			0	0	1	sp|P13647|K2C5_HUMAN;CON__P13647	sp|P13647|K2C5_HUMAN	sp|P13647|K2C5_HUMAN	ISO-MSMS	0	16062020_SKO_IP_Cep78	1	exp_1	529.305	2	529.304	1056.59	NaN	NaN	NaN	0.76256	0.00040363	NaN	NaN	NaN	NaN	NaN	14.248	0.11752	14.248	14.178	14.295	0								0	0	0	0.023163
LRDDFEK	7	1	1	Unmodified	_LRDDFEK_			0	0	1	sp|Q9Y2W1|TR150_HUMAN	sp|Q9Y2W1|TR150_HUMAN	sp|Q9Y2W1|TR150_HUMAN	MULTI-MSMS		16062020_SKO_IP_Cep78	1	exp_1	461.736	2	461.735	921.456	40290.7	0.40111	0.00018521	-0.36041	-0.00016641	0.040703	1.8794e-05	461.735	466.758	470.746	10.135	0.67292	10.135	9.7179	10.391	0					253	39	14	0	0	0	1.0985e-42
LREIELK	7	1	1	Unmodified	_LREIELK_			0	0	1	sp|O15042-2|SR140_HUMAN;sp|O15042|SR140_HUMAN;sp|O15042-3|SR140_HUMAN	sp|O15042-2|SR140_HUMAN	sp|O15042-2|SR140_HUMAN	MULTI-SECPEP		16062020_SKO_IP_Cep78	1	exp_1	460.229	2	450.779	899.544	40635	2.0564	0.000927	-0.99592	-0.00044894	1.0605	0.00047805	450.779	455.801	459.79	17.1	0.28631	17.1	16.971	17.258	0					108	16	10	0	0	0	0.00016801
LRSEIDNVK	9	1	1	Unmodified	_LRSEIDNVK_			0	0	1	CON__Q5XQN5;CON__Q922U2;sp|P04264|K2C1_HUMAN;CON__P04264	CON__Q5XQN5;sp|P04264|K2C1_HUMAN	sp|P04264|K2C1_HUMAN	ISO-MSMS	0	16062020_SKO_IP_Cep78	1	exp_1	537.3	2	537.301	1072.59	NaN	NaN	NaN	-0.17175	-9.2279e-05	NaN	NaN	NaN	NaN	NaN	11.251	0.4374	11.251	11.015	11.453	-1.7764e-15								0	0	0	0.0013224
LRTANEIYEK	10	1	1	Unmodified	_LRTANEIYEK_			0	0	1	sp|Q5W0B1|RN219_HUMAN	sp|Q5W0B1|RN219_HUMAN	sp|Q5W0B1|RN219_HUMAN	ISO-MSMS	2	16062020_SKO_IP_Cep78	1	exp_1	627.845	2	618.833	1235.65	NaN	NaN	NaN	-0.018347	-1.1354e-05	NaN	NaN	NaN	NaN	NaN	13.784	0.15124	13.784	13.691	13.842	0								0	0	0	0.021163
LRTFYEK	7	1	1	Unmodified	_LRTFYEK_			0	0	1	sp|P62753|RS6_HUMAN	sp|P62753|RS6_HUMAN	sp|P62753|RS6_HUMAN	MULTI-MSMS		16062020_SKO_IP_Cep78	1	exp_1	478.746	2	478.764	955.513	39552.4	0.24106	0.00011541	0.14883	7.1253e-05	0.38988	0.00018666	478.763	483.787	487.775	14.521	0.23472	14.521	14.362	14.597	1.7764e-15					86	13	11	0	0	0	2.4599e-42
LSIVPVRR	8	0	2	Unmodified	_LSIVPVRR_			0	0	1	sp|P15880|RS2_HUMAN	sp|P15880|RS2_HUMAN	sp|P15880|RS2_HUMAN	ISO-MSMS	0	16062020_SKO_IP_Cep78	1	exp_1	470.261	2	470.309	938.603	NaN	NaN	NaN	-0.15491	-7.2854e-05	NaN	NaN	NaN	NaN	NaN	21.126	0.27758	21.126	21.004	21.282	0								0	0	0	0.0032139
LSNIFVIGK	9	1	0	Unmodified	_LSNIFVIGK_			0	0	0	sp|P62701|RS4X_HUMAN	sp|P62701|RS4X_HUMAN	sp|P62701|RS4X_HUMAN	MULTI-MSMS		16062020_SKO_IP_Cep78	1	exp_1	495.803	2	495.803	989.591	41441	1.9948	0.00098903	0.1124	5.5727e-05	2.1072	0.0010448	495.803	497.815	499.81	50.409	0.36901	50.409	50.206	50.576	0					124	24	8	0	0	0	0.0027762
LSSPATLNSR	10	0	1	Unmodified	_LSSPATLNSR_			0	0	0	CON__P00761	CON__P00761	CON__P00761	ISO-MSMS	0	16062020_SKO_IP_Cep78	1	exp_1	523.286	2	523.285	1044.56	NaN	NaN	NaN	-1.4558	-0.00076182	NaN	NaN	NaN	NaN	NaN	16.913	0.90982	16.913	16.466	17.376	0								0	0	0	0.017342
LTDNGTEFSVK	11	1	0	Unmodified	_LTDNGTEFSVK_			0	0	0	sp|P52732|KIF11_HUMAN	sp|P52732|KIF11_HUMAN	sp|P52732|KIF11_HUMAN	ISO-MSMS	0	16062020_SKO_IP_Cep78	1	exp_1	605.801	2	605.801	1209.59	NaN	NaN	NaN	-1.0701	-0.00064825	NaN	NaN	NaN	NaN	NaN	24.531	0.28742	24.531	24.382	24.669	0								0	0	0	0.008561
LTDNGTEFSVK	11	1	0	Unmodified	_LTDNGTEFSVK_			0	0	0	sp|P52732|KIF11_HUMAN	sp|P52732|KIF11_HUMAN	sp|P52732|KIF11_HUMAN	MSMS	1	16062020_SKO_IP_Cep78	1	exp_1	607.814	2	605.801	1209.59	NaN	NaN	NaN	NaN	NaN	NaN	NaN	NaN	NaN	NaN	24.516	1	24.516	24.016	25.016	0								0	0	0	0.009037
LTDQVMQNPR	10	0	1	Oxidation (M)	_LTDQVM(ox)QNPR_	LTDQVM(1)QNPR	LTDQVM(146.03)QNPR	0	1	0	sp|Q99733|NP1L4_HUMAN;sp|Q99733-2|NP1L4_HUMAN	sp|Q99733|NP1L4_HUMAN	sp|Q99733|NP1L4_HUMAN	ISO-MSMS	2	16062020_SKO_IP_Cep78	1	exp_1	614.302	2	609.301	1216.59	NaN	NaN	NaN	0.95632	0.00058269	NaN	NaN	NaN	NaN	NaN	11.506	0.38311	11.506	11.237	11.62	0								0	0	0	0.00014637
LTDQVMQNPR	10	0	1	Oxidation (M)	_LTDQVM(ox)QNPR_	LTDQVM(1)QNPR	LTDQVM(95.61)QNPR	0	1	0	sp|Q99733|NP1L4_HUMAN;sp|Q99733-2|NP1L4_HUMAN	sp|Q99733|NP1L4_HUMAN	sp|Q99733|NP1L4_HUMAN	ISO-MSMS	0	16062020_SKO_IP_Cep78	1	exp_1	610.602	2	609.301	1216.59	NaN	NaN	NaN	0.45	0.00027418	NaN	NaN	NaN	NaN	NaN	11.522	0.44735	11.522	11.206	11.654	0								0	0	0	0.0077578
LTDQVMQNPR	10	0	1	Oxidation (M)	_LTDQVM(ox)QNPR_	LTDQVM(1)QNPR	LTDQVM(103.87)QNPR	0	1	0	sp|Q99733|NP1L4_HUMAN;sp|Q99733-2|NP1L4_HUMAN	sp|Q99733|NP1L4_HUMAN	sp|Q99733|NP1L4_HUMAN	MSMS	1	16062020_SKO_IP_Cep78	1	exp_1	612.308	2	609.301	1216.59	NaN	NaN	NaN	NaN	NaN	NaN	NaN	NaN	NaN	NaN	11.433	1	11.433	10.933	11.933	0								0	0	0	0.00036454
LTGDAFR	7	0	1	Unmodified	_LTGDAFR_			0	0	0	sp|O95881|TXD12_HUMAN	sp|O95881|TXD12_HUMAN	sp|O95881|TXD12_HUMAN	MULTI-MSMS		16062020_SKO_IP_Cep78	1	exp_1	393.218	2	390.206	778.397	43626.1	2.9448	0.0011491	-0.17097	-6.6713e-05	2.7738	0.0010824	390.206	393.216	395.21	15.81	0.50577	15.81	15.641	16.147	0					147	29	9	0	0	0	2.6086e-31
LTGDAFRK	8	1	1	Unmodified	_LTGDAFRK_			0	0	1	sp|O95881|TXD12_HUMAN	sp|O95881|TXD12_HUMAN	sp|O95881|TXD12_HUMAN	MULTI-MSMS		16062020_SKO_IP_Cep78	1	exp_1	454.254	2	454.253	906.492	41313.6	0.21043	9.559e-05	0.18532	8.4182e-05	0.39575	0.00017977	454.254	459.276	463.265	9.877	0.26914	9.877	9.7346	10.004	-1.7764e-15					110	15	11	0	0	0	0.00032056
LTIAEER	7	0	1	Unmodified	_LTIAEER_			0	0	0	sp|P62701|RS4X_HUMAN;sp|Q8TD47|RS4Y2_HUMAN	sp|P62701|RS4X_HUMAN	sp|P62701|RS4X_HUMAN	MSMS	0	16062020_SKO_IP_Cep78	1	exp_1	416.234	2	416.232	830.45	NaN	NaN	NaN	NaN	NaN	NaN	NaN	NaN	NaN	NaN	15.805	1	15.805	15.305	16.305	0								0	0	0	0.027364
LVRELEK	7	1	1	Unmodified	_LVRELEK_			0	0	1	sp|P62081|RS7_HUMAN	sp|P62081|RS7_HUMAN	sp|P62081|RS7_HUMAN	ISO-MSMS	0	16062020_SKO_IP_Cep78	1	exp_1	443.77	2	443.771	885.528	NaN	NaN	NaN	-0.54003	-0.00023965	NaN	NaN	NaN	NaN	NaN	9.342	0.18182	9.342	9.2332	9.415	0								0	0	0	0.0044064
MLQHIDYR	8	0	1	Oxidation (M)	_M(ox)LQHIDYR_	M(1)LQHIDYR	M(109.71)LQHIDYR	0	1	0	sp|P14678-2|RSMB_HUMAN;sp|P63162|RSMN_HUMAN;sp|P14678|RSMB_HUMAN;sp|P63162-2|RSMN_HUMAN;sp|P14678-3|RSMB_HUMAN	sp|P14678-2|RSMB_HUMAN	sp|P14678-2|RSMB_HUMAN	MULTI-MSMS		16062020_SKO_IP_Cep78	1	exp_1	551.273	2	546.269	1090.52	37006	0.94115	0.00051412	-1.1189	-0.00061124	-0.17779	-9.7119e-05	546.269	549.278	551.273	14.337	0.23474	14.337	14.228	14.463	1.7764e-15					83	13	9	0	0	0	9.2509e-17
MSISEGTVSDK	11	1	0	Oxidation (M)	_M(ox)SISEGTVSDK_	M(1)SISEGTVSDK	M(66.68)SISEGTVSDK	0	1	0	sp|P46821|MAP1B_HUMAN	sp|P46821|MAP1B_HUMAN	sp|P46821|MAP1B_HUMAN	ISO-MSMS	0	16062020_SKO_IP_Cep78	1	exp_1	585.272	2	585.271	1168.53	NaN	NaN	NaN	-0.39968	-0.00023392	NaN	NaN	NaN	NaN	NaN	12.522	0.16801	12.522	12.429	12.597	0								0	0	0	0.023511
MTDFDRFK	8	1	1	Oxidation (M)	_M(ox)TDFDRFK_	M(1)TDFDRFK	M(98.01)TDFDRFK	0	1	1	sp|P50914|RL14_HUMAN	sp|P50914|RL14_HUMAN	sp|P50914|RL14_HUMAN	ISO-MSMS	0	16062020_SKO_IP_Cep78	1	exp_1	538.249	2	538.247	1074.48	NaN	NaN	NaN	0.040558	2.183e-05	NaN	NaN	NaN	NaN	NaN	18.841	0.32038	18.841	18.672	18.993	0								0	0	0	0.013456
MTLDDFR	7	0	1	Oxidation (M)	_M(ox)TLDDFR_	M(1)TLDDFR	M(98.5)TLDDFR	0	1	0	sp|P35527|K1C9_HUMAN;CON__P35527	sp|P35527|K1C9_HUMAN	sp|P35527|K1C9_HUMAN	ISO-MSMS	0	16062020_SKO_IP_Cep78	1	exp_1	457.209	2	457.208	912.401	NaN	NaN	NaN	0.42033	0.00019218	NaN	NaN	NaN	NaN	NaN	23.963	0.5592	23.963	23.687	24.246	0								0	0	0	0.025105
MYEEHLK	7	1	0	Oxidation (M)	_M(ox)YEEHLK_	M(1)YEEHLK	M(107.32)YEEHLK	0	1	0	sp|P84090|ERH_HUMAN	sp|P84090|ERH_HUMAN	sp|P84090|ERH_HUMAN	MULTI-MSMS		16062020_SKO_IP_Cep78	1	exp_1	483.225	2	483.223	964.432	39035.4	0.36932	0.00017846	-0.020439	-9.8766e-06	0.34888	0.00016859	483.223	485.236	487.231	6.9085	0.28305	6.9085	6.6705	6.9535	0					112	16	9	0	0	0	4.5022e-10
NALESYAFNMK	11	1	0	Oxidation (M)	_NALESYAFNM(ox)K_	NALESYAFNM(1)K	NALESYAFNM(82.64)K	0	1	0	sp|P0DMV9|HS71B_HUMAN;sp|P0DMV8|HS71A_HUMAN;sp|P0DMV8-2|HS71A_HUMAN;sp|P34931|HS71L_HUMAN	sp|P0DMV9|HS71B_HUMAN	sp|P0DMV9|HS71B_HUMAN	ISO-MSMS	2	16062020_SKO_IP_Cep78	1	exp_1	656.316	2	652.303	1302.59	NaN	NaN	NaN	0.99227	0.00064726	NaN	NaN	NaN	NaN	NaN	35.33	0.35756	35.33	35.126	35.484	0								0	0	0	0.014909
NDLAVVDVR	9	0	1	Unmodified	_NDLAVVDVR_			0	0	0	sp|P19338|NUCL_HUMAN	sp|P19338|NUCL_HUMAN	sp|P19338|NUCL_HUMAN	MULTI-MSMS		16062020_SKO_IP_Cep78	1	exp_1	500.749	2	500.775	999.535	39750.9	2.7296	0.0013669	-0.9999	-0.00050072	1.7297	0.0008662	500.775	503.786	505.778	31.352	0.45632	31.352	31.115	31.572	-7.1054e-15					161	26	9	0	0	0	8.1931e-50
NEGSESAPEGQAQQR	15	0	1	Unmodified	_NEGSESAPEGQAQQR_			0	0	0	sp|P67809|YBOX1_HUMAN	sp|P67809|YBOX1_HUMAN	sp|P67809|YBOX1_HUMAN	ISO-MSMS	0	16062020_SKO_IP_Cep78	1	exp_1	794.354	2	794.353	1586.69	NaN	NaN	NaN	-0.4843	-0.00038471	NaN	NaN	NaN	NaN	NaN	6.4766	0.11732	6.4766	6.4019	6.5192	0								0	0	0	4.7596e-276
NEPIDLSK	8	1	0	Unmodified	_NEPIDLSK_			0	0	0	sp|Q96AV8-3|E2F7_HUMAN;sp|Q96AV8|E2F7_HUMAN;sp|Q96AV8-2|E2F7_HUMAN	sp|Q96AV8-3|E2F7_HUMAN	sp|Q96AV8-3|E2F7_HUMAN	MULTI-MSMS		16062020_SKO_IP_Cep78	1	exp_1	458.242	2	458.243	914.471	40920.7	0.88114	0.00040378	0.83196	0.00038124	1.7131	0.00078502	458.244	460.256	462.25	19.418	0.67428	19.418	19.043	19.718	0					113	30	7	0	0	0	0.010161
NFGEEVDDESLK	12	1	0	Unmodified	_NFGEEVDDESLK_			0	0	0	sp|Q13310-2|PABP4_HUMAN;sp|Q13310|PABP4_HUMAN;sp|Q13310-3|PABP4_HUMAN	sp|Q13310-2|PABP4_HUMAN	sp|Q13310-2|PABP4_HUMAN	ISO-MSMS	0	16062020_SKO_IP_Cep78	1	exp_1	691.316	2	691.31	1380.6	NaN	NaN	NaN	3.5937	0.0024843	NaN	NaN	NaN	NaN	NaN	30.597	0.28824	30.597	30.453	30.742	0								0	0	0	0.017886
NFGSYVTHETK	11	1	0	Unmodified	_NFGSYVTHETK_			0	0	0	sp|P63167|DYL1_HUMAN;sp|Q96FJ2|DYL2_HUMAN	sp|P63167|DYL1_HUMAN	sp|P63167|DYL1_HUMAN	ISO-MSMS	1	16062020_SKO_IP_Cep78	1	exp_1	643.821	2	641.807	1281.6	NaN	NaN	NaN	-0.40783	-0.00026175	NaN	NaN	NaN	NaN	NaN	17.147	0.43827	17.147	16.954	17.393	0								0	0	0	5.2285e-29
NFGSYVTHETK	11	1	0	Unmodified	_NFGSYVTHETK_			0	0	0	sp|P63167|DYL1_HUMAN;sp|Q96FJ2|DYL2_HUMAN	sp|P63167|DYL1_HUMAN	sp|P63167|DYL1_HUMAN	ISO-MSMS	0	16062020_SKO_IP_Cep78	1	exp_1	641.806	2	641.807	1281.6	NaN	NaN	NaN	-0.70161	-0.0004503	NaN	NaN	NaN	NaN	NaN	17.182	0.21877	17.182	17.056	17.275	0								0	0	0	0.0041378
NFLVEEEQR	9	0	1	Unmodified	_NFLVEEEQR_			0	0	0	sp|P19474|RO52_HUMAN	sp|P19474|RO52_HUMAN	sp|P19474|RO52_HUMAN	ISO-MSMS	0	16062020_SKO_IP_Cep78	1	exp_1	582.288	2	582.288	1162.56	NaN	NaN	NaN	2.7227	0.0015854	NaN	NaN	NaN	NaN	NaN	28.377	0.23629	28.377	28.255	28.491	0								0	0	0	2.0053e-07
NFLVEEEQR	9	0	1	Unmodified	_NFLVEEEQR_			0	0	0	sp|P19474|RO52_HUMAN	sp|P19474|RO52_HUMAN	sp|P19474|RO52_HUMAN	ISO-MSMS	2	16062020_SKO_IP_Cep78	1	exp_1	587.797	2	582.288	1162.56	NaN	NaN	NaN	-0.13945	-8.1203e-05	NaN	NaN	NaN	NaN	NaN	28.395	0.16807	28.395	28.238	28.406	0								0	0	0	0.01299
NFLVEEEQR	9	0	1	Unmodified	_NFLVEEEQR_			0	0	0	sp|P19474|RO52_HUMAN	sp|P19474|RO52_HUMAN	sp|P19474|RO52_HUMAN	MSMS	0	16062020_SKO_IP_Cep78	1	exp_1	582.294	2	582.288	1162.56	NaN	NaN	NaN	NaN	NaN	NaN	NaN	NaN	NaN	NaN	28.498	1	28.498	27.998	28.998	0								0	0	0	0.0039287
NFNQEGTK	8	1	0	Unmodified	_NFNQEGTK_			0	0	0	sp|P52732|KIF11_HUMAN	sp|P52732|KIF11_HUMAN	sp|P52732|KIF11_HUMAN	ISO-MSMS	0	16062020_SKO_IP_Cep78	1	exp_1	469.224	2	469.222	936.43	NaN	NaN	NaN	1.2058	0.00056578	NaN	NaN	NaN	NaN	NaN	1.5023	0.62212	1.5023	1.2696	1.8917	0								0	0	0	0.012358
NFRVTAYK	8	1	1	Unmodified	_NFRVTAYK_			0	0	1	sp|Q9Y2W1|TR150_HUMAN	sp|Q9Y2W1|TR150_HUMAN	sp|Q9Y2W1|TR150_HUMAN	MULTI-MSMS		16062020_SKO_IP_Cep78	1	exp_1	500.276	2	499.775	997.535	39982.7	-0.70045	-0.00035007	0.18706	9.3486e-05	-0.51339	-0.00025658	499.775	504.797	508.786	14.727	0.35192	14.727	14.614	14.966	0					71	14	8	0	0	0	5.5652e-58
NGQDLGVAFK	10	1	0	Unmodified	_NGQDLGVAFK_			0	0	0	sp|Q00839-2|HNRPU_HUMAN;sp|Q00839|HNRPU_HUMAN	sp|Q00839-2|HNRPU_HUMAN	sp|Q00839-2|HNRPU_HUMAN	ISO-MSMS	2	16062020_SKO_IP_Cep78	1	exp_1	528.783	2	524.775	1047.53	NaN	NaN	NaN	-0.99698	-0.00052319	NaN	NaN	NaN	NaN	NaN	28.928	0.25213	28.928	28.797	29.049	0								0	0	0	0.012553
NGQDLGVAFK	10	1	0	Unmodified	_NGQDLGVAFK_			0	0	0	sp|Q00839-2|HNRPU_HUMAN;sp|Q00839|HNRPU_HUMAN	sp|Q00839-2|HNRPU_HUMAN	sp|Q00839-2|HNRPU_HUMAN	ISO-MSMS	0	16062020_SKO_IP_Cep78	1	exp_1	525.274	2	524.775	1047.53	NaN	NaN	NaN	0.74052	0.00038861	NaN	NaN	NaN	NaN	NaN	28.948	0.21459	28.948	28.826	29.04	3.5527e-15								0	0	0	0.00023896
NGVYISEENFR	11	0	1	Unmodified	_NGVYISEENFR_			0	0	0	sp|P52732|KIF11_HUMAN	sp|P52732|KIF11_HUMAN	sp|P52732|KIF11_HUMAN	ISO-MSMS	0	16062020_SKO_IP_Cep78	1	exp_1	664.819	2	664.317	1326.62	NaN	NaN	NaN	-1.6227	-0.001078	NaN	NaN	NaN	NaN	NaN	34.812	0.1514	34.812	34.721	34.873	-7.1054e-15								0	0	0	0.0044196
NGYGFINR	8	0	1	Unmodified	_NGYGFINR_			0	0	0	sp|P16989-2|YBOX3_HUMAN;sp|P16989-3|YBOX3_HUMAN;sp|P16989|YBOX3_HUMAN;sp|Q9Y2T7|YBOX2_HUMAN;sp|P67809|YBOX1_HUMAN	sp|P16989-2|YBOX3_HUMAN;sp|P67809|YBOX1_HUMAN	sp|P67809|YBOX1_HUMAN	ISO-MSMS	0	16062020_SKO_IP_Cep78	1	exp_1	470.737	2	470.735	939.456	NaN	NaN	NaN	0.74779	0.00035201	NaN	NaN	NaN	NaN	NaN	25.402	0.38869	25.402	25.179	25.567	0								0	0	0	0.010893
NIGLGFK	7	1	0	Unmodified	_NIGLGFK_			0	0	0	sp|P62280|RS11_HUMAN	sp|P62280|RS11_HUMAN	sp|P62280|RS11_HUMAN	MULTI-MSMS		16062020_SKO_IP_Cep78	1	exp_1	374.722	2	374.721	747.428	44984.2	1.9459	0.00072917	0.062702	2.3496e-05	2.0086	0.00075266	374.721	376.734	378.728	30.831	0.47511	30.831	30.606	31.081	0					221	27	12	0	0	0	0.025571
NIQVVVR	7	0	1	Unmodified	_NIQVVVR_			0	0	0	sp|P52732|KIF11_HUMAN	sp|P52732|KIF11_HUMAN	sp|P52732|KIF11_HUMAN	MULTI-MSMS		16062020_SKO_IP_Cep78	1	exp_1	414.259	2	414.259	826.502	42719.6	0.98661	0.00040871	-0.2487	-0.00010302	0.73791	0.00030569	414.258	417.268	419.263	19.555	0.37181	19.555	19.413	19.785	0					137	21	10	0	0	0	2.2438e-31
NKLEGEIR	8	1	1	Unmodified	_NKLEGEIR_			0	0	1	sp|Q4VCS5-2|AMOT_HUMAN;sp|Q4VCS5|AMOT_HUMAN;sp|Q8IY63-2|AMOL1_HUMAN;sp|Q8IY63|AMOL1_HUMAN	sp|Q4VCS5-2|AMOT_HUMAN	sp|Q4VCS5-2|AMOT_HUMAN	ISO-MSMS	1	16062020_SKO_IP_Cep78	1	exp_1	484.792	2	479.769	957.524	NaN	NaN	NaN	0.17343	8.3207e-05	NaN	NaN	NaN	NaN	NaN	8.6124	0.24821	8.6124	8.5154	8.7636	0								0	0	0	0.023413
NKYEDEINK	9	2	0	Unmodified	_NKYEDEINK_			0	0	1	CON__Q5XQN5;CON__Q922U2;sp|P05787|K2C8_HUMAN;CON__P05787;sp|P05787-2|K2C8_HUMAN;CON__Q8VED5;sp|Q5XKE5|K2C79_HUMAN;CON__Q5XKE5;CON__H-INV:HIT000016045;CON__H-INV:HIT000292931;CON__Q9H552;sp|P04264|K2C1_HUMAN;CON__P04264;CON__Q6IFZ6;sp|P13647|K2C5_HUMAN;CON__P13647	CON__Q5XQN5;sp|P04264|K2C1_HUMAN;sp|P13647|K2C5_HUMAN	sp|P04264|K2C1_HUMAN	ISO-MSMS	0	16062020_SKO_IP_Cep78	1	exp_1	577.28	2	576.78	1151.55	NaN	NaN	NaN	-0.20113	-0.00011601	NaN	NaN	NaN	NaN	NaN	10.407	0.26956	10.407	10.239	10.509	0								0	0	0	0.00061599
NLDDGIDDER	10	0	1	Unmodified	_NLDDGIDDER_			0	0	0	sp|P11940-2|PABP1_HUMAN;sp|P11940|PABP1_HUMAN;sp|Q9H361|PABP3_HUMAN	sp|P11940-2|PABP1_HUMAN	sp|P11940-2|PABP1_HUMAN	ISO-MSMS	0	16062020_SKO_IP_Cep78	1	exp_1	581.255	2	581.255	1160.49	NaN	NaN	NaN	-2.2705	-0.0013198	NaN	NaN	NaN	NaN	NaN	19.692	0.40482	19.692	19.531	19.936	0								0	0	0	0.01317
NLDDGIDDER	10	0	1	Unmodified	_NLDDGIDDER_			0	0	0	sp|P11940-2|PABP1_HUMAN;sp|P11940|PABP1_HUMAN;sp|Q9H361|PABP3_HUMAN	sp|P11940-2|PABP1_HUMAN	sp|P11940-2|PABP1_HUMAN	ISO-MSMS	2	16062020_SKO_IP_Cep78	1	exp_1	586.26	2	581.255	1160.49	NaN	NaN	NaN	-0.013529	-7.8636e-06	NaN	NaN	NaN	NaN	NaN	19.686	0.37114	19.686	19.548	19.919	3.5527e-15								0	0	0	0.0072263
NLDDTIDDEK	10	1	0	Unmodified	_NLDDTIDDEK_			0	0	0	sp|Q13310-2|PABP4_HUMAN;sp|Q13310|PABP4_HUMAN;sp|Q13310-3|PABP4_HUMAN;sp|P0CB38|PAB4L_HUMAN	sp|Q13310-2|PABP4_HUMAN	sp|Q13310-2|PABP4_HUMAN	ISO-MSMS	2	16062020_SKO_IP_Cep78	1	exp_1	593.272	2	589.265	1176.51	NaN	NaN	NaN	2.3891	0.0014078	NaN	NaN	NaN	NaN	NaN	20.243	0.90963	20.243	19.886	20.795	0								0	0	0	5.2174e-05
NLDDTIDDEK	10	1	0	Unmodified	_NLDDTIDDEK_			0	0	0	sp|Q13310-2|PABP4_HUMAN;sp|Q13310|PABP4_HUMAN;sp|Q13310-3|PABP4_HUMAN;sp|P0CB38|PAB4L_HUMAN	sp|Q13310-2|PABP4_HUMAN	sp|Q13310-2|PABP4_HUMAN	ISO-MSMS	0	16062020_SKO_IP_Cep78	1	exp_1	589.766	2	589.265	1176.51	NaN	NaN	NaN	-0.19554	-0.00011522	NaN	NaN	NaN	NaN	NaN	20.264	0.3376	20.264	20.121	20.459	0								0	0	0	0.00049418
NLDDTIDDEK	10	1	0	Unmodified	_NLDDTIDDEK_			0	0	0	sp|Q13310-2|PABP4_HUMAN;sp|Q13310|PABP4_HUMAN;sp|Q13310-3|PABP4_HUMAN;sp|P0CB38|PAB4L_HUMAN	sp|Q13310-2|PABP4_HUMAN	sp|Q13310-2|PABP4_HUMAN	ISO-MSMS	1	16062020_SKO_IP_Cep78	1	exp_1	591.277	2	589.265	1176.51	NaN	NaN	NaN	-2.7593	-0.001626	NaN	NaN	NaN	NaN	NaN	20.27	0.304	20.27	20.138	20.442	0								0	0	0	0.019034
NLEELEEK	8	1	0	Unmodified	_NLEELEEK_			0	0	0	sp|Q9UN86-2|G3BP2_HUMAN;sp|Q9UN86|G3BP2_HUMAN	sp|Q9UN86-2|G3BP2_HUMAN	sp|Q9UN86-2|G3BP2_HUMAN	ISO-MSMS	2	16062020_SKO_IP_Cep78	1	exp_1	506.259	2	502.251	1002.49	NaN	NaN	NaN	-0.1753	-8.8045e-05	NaN	NaN	NaN	NaN	NaN	19.932	0.26901	19.932	19.785	20.054	0								0	0	0	0.012558
NLEVGIRK	8	1	1	Unmodified	_NLEVGIRK_			0	0	1	sp|Q9UNZ5|L10K_HUMAN	sp|Q9UNZ5|L10K_HUMAN	sp|Q9UNZ5|L10K_HUMAN	ISO-MSMS	0	16062020_SKO_IP_Cep78	1	exp_1	464.783	2	464.782	927.55	NaN	NaN	NaN	-0.35632	-0.00016561	NaN	NaN	NaN	NaN	NaN	14.404	0.13415	14.404	14.329	14.463	0								0	0	0	0.0087712
NNASTDYDLSDK	12	1	0	Unmodified	_NNASTDYDLSDK_			0	0	0	sp|P39023|RL3_HUMAN	sp|P39023|RL3_HUMAN	sp|P39023|RL3_HUMAN	MULTI-MSMS		16062020_SKO_IP_Cep78	1	exp_1	675.802	2	671.792	1341.57	33503.6	1.3136	0.00088245	-0.6029	-0.00040502	0.71068	0.00047743	671.791	673.804	675.798	16.86	0.30342	16.86	16.719	17.022	0					127	17	12	0	0	0	1.4994e-54
NQDATVYVGGLDEK	14	1	0	Unmodified	_NQDATVYVGGLDEK_			0	0	0	sp|Q15427|SF3B4_HUMAN	sp|Q15427|SF3B4_HUMAN	sp|Q15427|SF3B4_HUMAN	ISO-MSMS	2	16062020_SKO_IP_Cep78	1	exp_1	759.305	2	754.865	1507.72	NaN	NaN	NaN	-0.087077	-6.5732e-05	NaN	NaN	NaN	NaN	NaN	33.312	0.2542	33.312	33.177	33.431	7.1054e-15								0	0	0	0.0014068
NQVALNPQNTVFDAK	15	1	0	Unmodified	_NQVALNPQNTVFDAK_			0	0	0	sp|P0DMV9|HS71B_HUMAN;sp|P0DMV8|HS71A_HUMAN;sp|P0DMV8-2|HS71A_HUMAN	sp|P0DMV9|HS71B_HUMAN	sp|P0DMV9|HS71B_HUMAN	ISO-MSMS	0	16062020_SKO_IP_Cep78	1	exp_1	830.382	2	829.928	1657.84	NaN	NaN	NaN	1.1527	0.00095665	NaN	NaN	NaN	NaN	NaN	41.847	0.45901	41.847	41.589	42.048	0								0	0	0	6.6122e-146
NSLESYAFNMK	11	1	0	Oxidation (M)	_NSLESYAFNM(ox)K_	NSLESYAFNM(1)K	NSLESYAFNM(108.57)K	0	1	0	sp|P11142|HSP7C_HUMAN	sp|P11142|HSP7C_HUMAN	sp|P11142|HSP7C_HUMAN	ISO-MSMS	0	16062020_SKO_IP_Cep78	1	exp_1	660.303	2	660.3	1318.59	NaN	NaN	NaN	0.55605	0.00036716	NaN	NaN	NaN	NaN	NaN	34.114	0.28932	34.114	33.907	34.197	0								0	0	0	0.0018
NSMPASSFQQQK	12	1	0	Oxidation (M)	_NSM(ox)PASSFQQQK_	NSM(1)PASSFQQQK	NSM(126.55)PASSFQQQK	0	1	0	sp|Q9Y383-3|LC7L2_HUMAN;sp|Q9Y383-2|LC7L2_HUMAN;sp|Q9Y383|LC7L2_HUMAN;sp|Q96HJ9-2|FMC1_HUMAN;sp|Q9NQ29-2|LUC7L_HUMAN;sp|Q9NQ29-3|LUC7L_HUMAN;sp|Q9NQ29|LUC7L_HUMAN	sp|Q9Y383-3|LC7L2_HUMAN	sp|Q9Y383-3|LC7L2_HUMAN	ISO-MSMS	0	16062020_SKO_IP_Cep78	1	exp_1	684.816	2	684.814	1367.61	NaN	NaN	NaN	0.055068	3.7711e-05	NaN	NaN	NaN	NaN	NaN	9.9619	0.25161	9.9619	9.8192	10.071	0								0	0	0	0.00049932
NTLQLHR	7	0	1	Unmodified	_NTLQLHR_			0	0	0	sp|P61313|RL15_HUMAN	sp|P61313|RL15_HUMAN	sp|P61313|RL15_HUMAN	ISO-MSMS	1	16062020_SKO_IP_Cep78	1	exp_1	444.262	2	441.251	880.488	NaN	NaN	NaN	0.63589	0.00028059	NaN	NaN	NaN	NaN	NaN	9.5199	0.15104	9.5199	9.4486	9.5997	0								0	0	0	0.016409
NTRETAQAIK	10	1	1	Unmodified	_NTRETAQAIK_			0	0	1	sp|P18621|RL17_HUMAN;sp|P18621-3|RL17_HUMAN	sp|P18621|RL17_HUMAN	sp|P18621|RL17_HUMAN	ISO-MSMS	2	16062020_SKO_IP_Cep78	1	exp_1	575.32	2	566.309	1130.6	NaN	NaN	NaN	-0.37808	-0.00021411	NaN	NaN	NaN	NaN	NaN	5.9411	0.067048	5.9411	5.8992	5.9662	0								0	0	0	0.011249
NTRETAQAIK	10	1	1	Unmodified	_NTRETAQAIK_			0	0	1	sp|P18621|RL17_HUMAN;sp|P18621-3|RL17_HUMAN	sp|P18621|RL17_HUMAN	sp|P18621|RL17_HUMAN	ISO-MSMS	0	16062020_SKO_IP_Cep78	1	exp_1	566.311	2	566.309	1130.6	NaN	NaN	NaN	1.4153	0.0008015	NaN	NaN	NaN	NaN	NaN	5.9411	0.067048	5.9411	5.8992	5.9662	0								0	0	0	0.026969
NTTGVTEEALK	11	1	0	Unmodified	_NTTGVTEEALK_			0	0	0	sp|Q13813-3|SPTN1_HUMAN;sp|Q13813|SPTN1_HUMAN;sp|Q13813-2|SPTN1_HUMAN	sp|Q13813-3|SPTN1_HUMAN	sp|Q13813-3|SPTN1_HUMAN	MULTI-MSMS		16062020_SKO_IP_Cep78	1	exp_1	585.809	2	581.801	1161.59	37575.4	0.83689	0.00048691	0.65257	0.00037967	1.4895	0.00086657	581.802	583.814	585.809	16.841	0.16878	16.841	16.735	16.904	0					53	9	8	0	0	0	0.0064839
NYQQNYQNSESGEK	14	1	0	Unmodified	_NYQQNYQNSESGEK_			0	0	0	sp|P67809|YBOX1_HUMAN	sp|P67809|YBOX1_HUMAN	sp|P67809|YBOX1_HUMAN	ISO-MSMS	0	16062020_SKO_IP_Cep78	1	exp_1	845.361	2	844.861	1687.71	NaN	NaN	NaN	-0.12929	-0.00010923	NaN	NaN	NaN	NaN	NaN	9.2551	0.26573	9.2551	9.1661	9.4318	0								0	0	0	5.1541e-75
NYQQNYQNSESGEK	14	1	0	Unmodified	_NYQQNYQNSESGEK_			0	0	0	sp|P67809|YBOX1_HUMAN	sp|P67809|YBOX1_HUMAN	sp|P67809|YBOX1_HUMAN	ISO-MSMS	2	16062020_SKO_IP_Cep78	1	exp_1	848.865	2	844.861	1687.71	NaN	NaN	NaN	0.75257	0.00063581	NaN	NaN	NaN	NaN	NaN	9.2759	0.33171	9.2759	9.1337	9.4654	0								0	0	0	3.0102e-60
PAGPAALAAR	10	0	1	Unmodified	_PAGPAALAAR_			0	0	0	sp|O00268|TAF4_HUMAN	sp|O00268|TAF4_HUMAN	sp|O00268|TAF4_HUMAN	MULTI-MSMS		16062020_SKO_IP_Cep78	1	exp_1	447.764	2	447.761	893.508	41777.9	1.376	0.00061612	2.0832	0.00093279	3.4592	0.0015489	447.762	450.771	452.768	16.798	0.3708	16.798	16.55	16.921	0					63	19	6	0	0	0	2.7638e-08
PATSYVR	7	0	1	Unmodified	_PATSYVR_			0	0	0	sp|P46779|RL28_HUMAN;sp|P46779-2|RL28_HUMAN;sp|P46779-3|RL28_HUMAN	sp|P46779|RL28_HUMAN	sp|P46779|RL28_HUMAN	ISO-MSMS	0	16062020_SKO_IP_Cep78	1	exp_1	397.214	2	397.214	792.413	NaN	NaN	NaN	1.2841	0.00051005	NaN	NaN	NaN	NaN	NaN	7.0565	0.1218	7.0565	6.987	7.1088	0								0	0	0	0.017506
PISTLDNR	8	0	1	Unmodified	_PISTLDNR_			0	0	0	sp|P31689-2|DNJA1_HUMAN;sp|P31689|DNJA1_HUMAN	sp|P31689-2|DNJA1_HUMAN	sp|P31689-2|DNJA1_HUMAN	ISO-MSMS	0	16062020_SKO_IP_Cep78	1	exp_1	458.248	2	458.248	914.482	NaN	NaN	NaN	0.37605	0.00017233	NaN	NaN	NaN	NaN	NaN	13.983	0.6047	13.983	13.657	14.262	0								0	0	0	0.012283
PLDLRPK	7	1	1	Unmodified	_PLDLRPK_			0	0	1	sp|P42766|RL35_HUMAN	sp|P42766|RL35_HUMAN	sp|P42766|RL35_HUMAN	ISO-MSMS	0	16062020_SKO_IP_Cep78	1	exp_1	419.76	2	419.761	837.507	NaN	NaN	NaN	-0.84731	-0.00035567	NaN	NaN	NaN	NaN	NaN	14.986	0.21317	14.986	14.915	15.129	1.7764e-15								0	0	0	0.022727
PLSSVQENIQQK	12	1	0	Unmodified	_PLSSVQENIQQK_			0	0	0	sp|P52732|KIF11_HUMAN	sp|P52732|KIF11_HUMAN	sp|P52732|KIF11_HUMAN	ISO-MSMS	0	16062020_SKO_IP_Cep78	1	exp_1	685.867	2	685.867	1369.72	NaN	NaN	NaN	-0.27452	-0.00018828	NaN	NaN	NaN	NaN	NaN	19.24	0.30253	19.24	19.077	19.379	-3.5527e-15								0	0	0	3.9875e-23
PLSSVQENIQQK	12	1	0	Unmodified	_PLSSVQENIQQK_			0	0	0	sp|P52732|KIF11_HUMAN	sp|P52732|KIF11_HUMAN	sp|P52732|KIF11_HUMAN	ISO-MSMS	2	16062020_SKO_IP_Cep78	1	exp_1	689.875	2	685.867	1369.72	NaN	NaN	NaN	1.3499	0.00092583	NaN	NaN	NaN	NaN	NaN	19.231	0.26893	19.231	19.094	19.363	0								0	0	0	1.9064e-82
PLSSVQENIQQK	12	1	0	Unmodified	_PLSSVQENIQQK_			0	0	0	sp|P52732|KIF11_HUMAN	sp|P52732|KIF11_HUMAN	sp|P52732|KIF11_HUMAN	MSMS	1	16062020_SKO_IP_Cep78	1	exp_1	687.88	2	685.867	1369.72	NaN	NaN	NaN	NaN	NaN	NaN	NaN	NaN	NaN	NaN	19.239	1	19.239	18.739	19.739	0								0	0	0	0.0011402
PLTQSGGAPPPPGGK	15	1	0	Unmodified	_PLTQSGGAPPPPGGK_			0	0	0	sp|P46821|MAP1B_HUMAN	sp|P46821|MAP1B_HUMAN	sp|P46821|MAP1B_HUMAN	ISO-MSMS	0	16062020_SKO_IP_Cep78	1	exp_1	681.365	2	680.865	1359.71	NaN	NaN	NaN	2.0087	0.0013676	NaN	NaN	NaN	NaN	NaN	14.848	0.11819	14.848	14.764	14.882	0								0	0	0	0.025332
PRVMMENELK	10	1	1	2 Oxidation (M)	_PRVM(ox)M(ox)ENELK_	PRVM(1)M(1)ENELK	PRVM(65.25)M(65.25)ENELK	0	2	1		REV__sp|O95835-2|LATS1_HUMAN	REV__sp|O95835-2|LATS1_HUMAN	ISO-MSMS	0	16062020_SKO_IP_Cep78	1	exp_1	640.315	2	639.813	1277.61	NaN	NaN	NaN	-1.432	-0.00091622	NaN	NaN	NaN	NaN	NaN	17.134	0.20177	17.134	17.039	17.241	0								0	0	0	0.0066242
PVHHGVNQLK	10	1	0	Unmodified	_PVHHGVNQLK_			0	0	0	sp|P61313|RL15_HUMAN;sp|P61313-2|RL15_HUMAN	sp|P61313|RL15_HUMAN	sp|P61313|RL15_HUMAN	ISO-MSMS	2	16062020_SKO_IP_Cep78	1	exp_1	568.824	2	564.817	1127.62	NaN	NaN	NaN	-0.20288	-0.00011459	NaN	NaN	NaN	NaN	NaN	1.2109	0.26926	1.2109	1.0004	1.2696	0								0	0	0	0.013449
QLIVGVNK	8	1	0	Unmodified	_QLIVGVNK_			0	0	0	sp|Q5VTE0|EF1A3_HUMAN;sp|P68104|EF1A1_HUMAN;sp|Q05639|EF1A2_HUMAN	sp|Q5VTE0|EF1A3_HUMAN	sp|Q5VTE0|EF1A3_HUMAN	MULTI-MSMS		16062020_SKO_IP_Cep78	1	exp_1	435.775	2	435.774	869.533	42883.9	1.5743	0.00068606	0.70715	0.00030816	2.2815	0.00099421	435.774	437.787	439.781	20.567	0.25275	20.567	20.459	20.711	0					60	14	8	0	0	0	3.7076e-17
QPTIFQNK	8	1	0	Unmodified	_QPTIFQNK_			0	0	0	sp|P62280|RS11_HUMAN	sp|P62280|RS11_HUMAN	sp|P62280|RS11_HUMAN	ISO-MSMS	2	16062020_SKO_IP_Cep78	1	exp_1	492.274	2	488.267	974.519	NaN	NaN	NaN	-0.56321	-0.000275	NaN	NaN	NaN	NaN	NaN	19.159	0.84234	19.159	19.043	19.886	3.5527e-15								0	0	0	0.019707
QTATQLLK	8	1	0	Unmodified	_QTATQLLK_			0	0	0	sp|P62424|RL7A_HUMAN	sp|P62424|RL7A_HUMAN	sp|P62424|RL7A_HUMAN	ISO-MSMS	2	16062020_SKO_IP_Cep78	1	exp_1	455.777	2	451.769	901.523	NaN	NaN	NaN	1.4148	0.00063914	NaN	NaN	NaN	NaN	NaN	16.992	0.50544	16.992	16.752	17.258	0								0	0	0	0.0098375
QTATQLLK	8	1	0	Unmodified	_QTATQLLK_			0	0	0	sp|P62424|RL7A_HUMAN	sp|P62424|RL7A_HUMAN	sp|P62424|RL7A_HUMAN	ISO-MSMS	0	16062020_SKO_IP_Cep78	1	exp_1	451.77	2	451.769	901.523	NaN	NaN	NaN	-0.66473	-0.0003003	NaN	NaN	NaN	NaN	NaN	16.959	0.2867	16.959	16.786	17.073	3.5527e-15								0	0	0	0.011955
QTYSTEPNNLK	11	1	0	Unmodified	_QTYSTEPNNLK_			0	0	0	sp|P46779|RL28_HUMAN;sp|P46779-2|RL28_HUMAN;sp|P46779-3|RL28_HUMAN;sp|P46779-4|RL28_HUMAN;sp|P46779-5|RL28_HUMAN	sp|P46779|RL28_HUMAN	sp|P46779|RL28_HUMAN	MULTI-MSMS		16062020_SKO_IP_Cep78	1	exp_1	651.825	2	647.817	1293.62	35171.8	0.31644	0.00020499	-0.23078	-0.0001495	0.08566	5.5492e-05	647.817	649.83	651.825	14.452	0.15091	14.452	14.362	14.513	0					55	8	9	0	0	0	3.7646e-156
RAAVLLEQER	10	0	2	Unmodified	_RAAVLLEQER_			0	0	1	sp|Q13435|SF3B2_HUMAN	sp|Q13435|SF3B2_HUMAN	sp|Q13435|SF3B2_HUMAN	ISO-MSMS	2	16062020_SKO_IP_Cep78	1	exp_1	602.851	2	592.841	1183.67	NaN	NaN	NaN	-1.4808	-0.00087786	NaN	NaN	NaN	NaN	NaN	15.875	0.26916	15.875	15.742	16.011	-1.7764e-15								0	0	0	0.0085677
RAFLIEEQK	9	1	1	Unmodified	_RAFLIEEQK_			0	0	1	sp|P49207|RL34_HUMAN	sp|P49207|RL34_HUMAN	sp|P49207|RL34_HUMAN	MULTI-MSMS		16062020_SKO_IP_Cep78	1	exp_1	567.319	2	567.319	1132.62	36945.5	0.33269	0.00018874	0.42743	0.00024249	0.76012	0.00043123	567.32	572.344	576.331	19.575	0.3886	19.575	19.396	19.785	0					166	22	12	0	0	0	3.0197e-93
RAGELTEDEVER	12	0	2	Unmodified	_RAGELTEDEVER_			0	0	1	sp|P62269|RS18_HUMAN	sp|P62269|RS18_HUMAN	sp|P62269|RS18_HUMAN	MULTI-MSMS		16062020_SKO_IP_Cep78	1	exp_1	702.342	2	702.342	1402.67	33561.3	1.2164	0.00085433	-0.92562	-0.0006501	0.29078	0.00020423	702.341	708.361	712.35	14.351	0.15089	14.351	14.262	14.413	1.7764e-15					59	8	9	0	0	0	1.3042e-69
REFIQEPAK	9	1	1	Unmodified	_REFIQEPAK_			0	0	1	sp|O14744-5|ANM5_HUMAN;sp|O14744|ANM5_HUMAN;sp|O14744-3|ANM5_HUMAN;sp|O14744-2|ANM5_HUMAN;sp|O14744-4|ANM5_HUMAN	sp|O14744-5|ANM5_HUMAN	sp|O14744-5|ANM5_HUMAN	ISO-MSMS	2	16062020_SKO_IP_Cep78	1	exp_1	568.317	2	559.304	1116.59	NaN	NaN	NaN	-2.0505	-0.0011469	NaN	NaN	NaN	NaN	NaN	14.335	0.31861	14.335	14.195	14.513	0								0	0	0	0.004575
REFIQEPAK	9	1	1	Unmodified	_REFIQEPAK_			0	0	1	sp|O14744-5|ANM5_HUMAN;sp|O14744|ANM5_HUMAN;sp|O14744-3|ANM5_HUMAN;sp|O14744-2|ANM5_HUMAN;sp|O14744-4|ANM5_HUMAN	sp|O14744-5|ANM5_HUMAN	sp|O14744-5|ANM5_HUMAN	ISO-MSMS	1	16062020_SKO_IP_Cep78	1	exp_1	564.329	2	559.304	1116.59	NaN	NaN	NaN	2.1377	0.0011956	NaN	NaN	NaN	NaN	NaN	14.304	0.45307	14.304	14.01	14.463	0								0	0	0	0.0041495
RFDDAVVQSDMK	12	1	1	Oxidation (M)	_RFDDAVVQSDM(ox)K_	RFDDAVVQSDM(1)K	RFDDAVVQSDM(119.55)K	0	1	1	sp|P11142|HSP7C_HUMAN;sp|P11142-2|HSP7C_HUMAN	sp|P11142|HSP7C_HUMAN	sp|P11142|HSP7C_HUMAN	ISO-MSMS	0	16062020_SKO_IP_Cep78	1	exp_1	713.835	2	713.835	1425.66	NaN	NaN	NaN	0.43676	0.00031178	NaN	NaN	NaN	NaN	NaN	17.236	0.20221	17.236	17.123	17.325	0								0	0	0	0.00052823
RFDDAVVQSDMK	12	1	1	Oxidation (M)	_RFDDAVVQSDM(ox)K_	RFDDAVVQSDM(1)K	RFDDAVVQSDM(67.52)K	0	1	1	sp|P11142|HSP7C_HUMAN;sp|P11142-2|HSP7C_HUMAN	sp|P11142|HSP7C_HUMAN	sp|P11142|HSP7C_HUMAN	ISO-MSMS	1	16062020_SKO_IP_Cep78	1	exp_1	718.862	2	713.835	1425.66	NaN	NaN	NaN	1.5133	0.0010802	NaN	NaN	NaN	NaN	NaN	17.222	0.15183	17.222	17.14	17.292	0								0	0	0	0.01168
RFEGLTQR	8	0	2	Unmodified	_RFEGLTQR_			0	0	1	sp|Q9Y2H1|ST38L_HUMAN;sp|Q9Y2H1-2|ST38L_HUMAN	sp|Q9Y2H1|ST38L_HUMAN	sp|Q9Y2H1|ST38L_HUMAN	ISO-MSMS	0	16062020_SKO_IP_Cep78	1	exp_1	503.776	2	503.775	1005.54	NaN	NaN	NaN	-1.0813	-0.00054475	NaN	NaN	NaN	NaN	NaN	13.799	0.26894	13.799	13.674	13.943	0								0	0	0	0.0047048
RFPGYDSESK	10	1	1	Unmodified	_RFPGYDSESK_			0	0	1	sp|P46777|RL5_HUMAN	sp|P46777|RL5_HUMAN	sp|P46777|RL5_HUMAN	ISO-MSMS	0	16062020_SKO_IP_Cep78	1	exp_1	593.281	2	593.28	1184.55	NaN	NaN	NaN	0.30454	0.00018068	NaN	NaN	NaN	NaN	NaN	14.379	0.3856	14.379	14.245	14.631	0								0	0	0	4.5923e-20
RFPGYDSESK	10	1	1	Unmodified	_RFPGYDSESK_			0	0	1	sp|P46777|RL5_HUMAN	sp|P46777|RL5_HUMAN	sp|P46777|RL5_HUMAN	ISO-MSMS	2	16062020_SKO_IP_Cep78	1	exp_1	602.293	2	593.28	1184.55	NaN	NaN	NaN	-0.58077	-0.00034456	NaN	NaN	NaN	NaN	NaN	14.354	0.35207	14.354	14.245	14.597	0								0	0	0	0.0022822
RFSLFGK	7	1	1	Unmodified	_RFSLFGK_			0	0	1	sp|Q01082|SPTB2_HUMAN	sp|Q01082|SPTB2_HUMAN	sp|Q01082|SPTB2_HUMAN	MULTI-SECPEP		16062020_SKO_IP_Cep78	1	exp_1	436.759	2	427.748	853.481	42706.6	2.619	0.0011203	1.3387	0.00057262	3.9577	0.0016929	427.748	432.771	436.76	32.028	0.41422	32.028	31.857	32.271	0					107	24	7	0	0	0	0.0068755
RFTDEESR	8	0	2	Unmodified	_RFTDEESR_			0	0	1	sp|Q9NYF8-3|BCLF1_HUMAN;sp|Q9NYF8-2|BCLF1_HUMAN;sp|Q9NYF8|BCLF1_HUMAN	sp|Q9NYF8-3|BCLF1_HUMAN	sp|Q9NYF8-3|BCLF1_HUMAN	MULTI-MSMS		16062020_SKO_IP_Cep78	1	exp_1	520.244	2	520.244	1038.47	37290.3	0.75083	0.00039061	0.61409	0.00031948	1.3649	0.00071009	520.244	526.266	530.253	6.3101	0.21776	6.3101	6.2176	6.4354	0					44	12	9	0	0	0	2.3002e-166
RGDDSFGDK	9	1	1	Unmodified	_RGDDSFGDK_			0	0	1	sp|P23588|IF4B_HUMAN;sp|P23588-2|IF4B_HUMAN	sp|P23588|IF4B_HUMAN	sp|P23588|IF4B_HUMAN	MSMS	0	16062020_SKO_IP_Cep78	1	exp_1	498.722	2	498.723	995.431	NaN	NaN	NaN	NaN	NaN	NaN	NaN	NaN	NaN	NaN	0.01808	1	0.01808	-0.48192	0.51808	0								0	0	0	4.7922e-55
RGDDSFGDK	9	1	1	Unmodified	_RGDDSFGDK_			0	0	1	sp|P23588|IF4B_HUMAN;sp|P23588-2|IF4B_HUMAN	sp|P23588|IF4B_HUMAN	sp|P23588|IF4B_HUMAN	MSMS	2	16062020_SKO_IP_Cep78	1	exp_1	507.734	2	498.723	995.431	NaN	NaN	NaN	NaN	NaN	NaN	NaN	NaN	NaN	NaN	0.019226	1	0.019226	-0.48077	0.51923	0								0	0	0	3.442e-22
RGILTLK	7	1	1	Unmodified	_RGILTLK_			0	0	1	sp|P63261|ACTG_HUMAN;sp|P60709|ACTB_HUMAN;sp|P63267|ACTH_HUMAN;sp|P68133|ACTS_HUMAN;sp|P68032|ACTC_HUMAN;sp|P62736|ACTA_HUMAN;sp|P0CG39|POTEJ_HUMAN;sp|Q6S8J3|POTEE_HUMAN;sp|P0CG38|POTEI_HUMAN;sp|A5A3E0|POTEF_HUMAN	sp|P63261|ACTG_HUMAN	sp|P63261|ACTG_HUMAN	MULTI-MSMS		16062020_SKO_IP_Cep78	1	exp_1	409.783	2	400.771	799.528	43222.2	1.8156	0.00072764	-0.07678	-3.0771e-05	1.7388	0.00069687	400.771	405.794	409.782	18.367	0.3537	18.367	18.201	18.555	0					102	20	8	0	0	0	0.016581
RIAELSEDDQK	11	1	1	Unmodified	_RIAELSEDDQK_			0	0	1	sp|Q9BZE4-3|NOG1_HUMAN;sp|Q9BZE4-2|NOG1_HUMAN;sp|Q9BZE4|NOG1_HUMAN	sp|Q9BZE4-3|NOG1_HUMAN	sp|Q9BZE4-3|NOG1_HUMAN	ISO-MSMS	0	16062020_SKO_IP_Cep78	1	exp_1	652.329	2	652.328	1302.64	NaN	NaN	NaN	1.1611	0.00075744	NaN	NaN	NaN	NaN	NaN	13.009	0.16879	13.009	12.917	13.086	0								0	0	0	0.0010055
RIHGVGFK	8	1	1	Unmodified	_RIHGVGFK_			0	0	1	sp|P62899-3|RL31_HUMAN;sp|P62899|RL31_HUMAN;sp|P62899-2|RL31_HUMAN	sp|P62899-3|RL31_HUMAN	sp|P62899-3|RL31_HUMAN	ISO-MSMS	0	16062020_SKO_IP_Cep78	1	exp_1	457.269	2	457.272	912.529	NaN	NaN	NaN	-1.1956	-0.00054672	NaN	NaN	NaN	NaN	NaN	7.3641	0.12461	7.3641	7.3094	7.434	0								0	0	0	0.0033053
RLASSVLR	8	0	2	Unmodified	_RLASSVLR_			0	0	1	sp|P84098|RL19_HUMAN	sp|P84098|RL19_HUMAN	sp|P84098|RL19_HUMAN	MULTI-MSMS		16062020_SKO_IP_Cep78	1	exp_1	452.267	2	451.283	900.55	41190.5	0.95202	0.00042963	-0.031802	-1.4352e-05	0.92021	0.00041528	451.282	457.303	461.291	11.906	0.53872	11.906	11.637	12.176	0					218	31	9	0	0	0	0.00025139
RLQTQVFK	8	1	1	Unmodified	_RLQTQVFK_			0	0	1	sp|P46781|RS9_HUMAN	sp|P46781|RS9_HUMAN	sp|P46781|RS9_HUMAN	ISO-MSMS	0	16062020_SKO_IP_Cep78	1	exp_1	510.306	2	510.303	1018.59	NaN	NaN	NaN	0.28819	0.00014706	NaN	NaN	NaN	NaN	NaN	14.281	0.13415	14.281	14.211	14.346	0								0	0	0	0.0056546
RLSYNTASNK	10	1	1	Unmodified	_RLSYNTASNK_			0	0	1	sp|P49207|RL34_HUMAN	sp|P49207|RL34_HUMAN	sp|P49207|RL34_HUMAN	ISO-MSMS	2	16062020_SKO_IP_Cep78	1	exp_1	586.314	2	577.302	1152.59	NaN	NaN	NaN	0.80738	0.0004661	NaN	NaN	NaN	NaN	NaN	6.2936	0.083748	6.2936	6.2344	6.3181	0								0	0	0	0.01068
RLSYNTASNK	10	1	1	Unmodified	_RLSYNTASNK_			0	0	1	sp|P49207|RL34_HUMAN	sp|P49207|RL34_HUMAN	sp|P49207|RL34_HUMAN	ISO-MSMS	0	16062020_SKO_IP_Cep78	1	exp_1	577.302	2	577.302	1152.59	NaN	NaN	NaN	0.61179	0.00035319	NaN	NaN	NaN	NaN	NaN	6.293	0.083748	6.293	6.2344	6.3181	0								0	0	0	1.2019e-28
RMVVPAALK	9	1	1	Oxidation (M)	_RM(ox)VVPAALK_	RM(1)VVPAALK	RM(57.18)VVPAALK	0	1	1	sp|P40429|RL13A_HUMAN;sp|Q6NVV1|R13P3_HUMAN	sp|P40429|RL13A_HUMAN	sp|P40429|RL13A_HUMAN	MULTI-MSMS		16062020_SKO_IP_Cep78	1	exp_1	500.803	2	500.802	999.59	39736.7	1.8681	0.00093555	0.30528	0.00015289	2.1734	0.0010884	500.802	505.826	509.814	14.201	0.31898	14.201	13.96	14.279	0					75	12	9	0	0	0	0.028008
RNTTIPTK	8	1	1	Unmodified	_RNTTIPTK_			0	0	1	sp|P11142|HSP7C_HUMAN;sp|P11142-2|HSP7C_HUMAN;sp|P54652|HSP72_HUMAN	sp|P11142|HSP7C_HUMAN	sp|P11142|HSP7C_HUMAN	ISO-MSMS	0	16062020_SKO_IP_Cep78	1	exp_1	465.773	2	465.772	929.529	NaN	NaN	NaN	-0.11119	-5.1787e-05	NaN	NaN	NaN	NaN	NaN	6.0417	0.15092	6.0417	5.9327	6.0836	0								0	0	0	0.0048061
RNTTIPTK	8	1	1	Unmodified	_RNTTIPTK_			0	0	1	sp|P11142|HSP7C_HUMAN;sp|P11142-2|HSP7C_HUMAN;sp|P54652|HSP72_HUMAN	sp|P11142|HSP7C_HUMAN	sp|P11142|HSP7C_HUMAN	ISO-MSMS	2	16062020_SKO_IP_Cep78	1	exp_1	474.783	2	465.772	929.529	NaN	NaN	NaN	-0.4541	-0.00021151	NaN	NaN	NaN	NaN	NaN	6.0307	0.083856	6.0307	5.983	6.0668	0								0	0	0	0.019851
RNVIEAVYSR	10	0	2	Unmodified	_RNVIEAVYSR_			0	0	1	sp|O75688|PPM1B_HUMAN;sp|O75688-4|PPM1B_HUMAN;sp|O75688-2|PPM1B_HUMAN;sp|O75688-3|PPM1B_HUMAN	sp|O75688|PPM1B_HUMAN	sp|O75688|PPM1B_HUMAN	MULTI-MSMS		16062020_SKO_IP_Cep78	1	exp_1	609.857	2	603.833	1205.65	35374.3	0.84222	0.00050856	1.2402	0.00074888	2.0824	0.0012574	603.833	609.855	613.843	25.415	1.3202	25.415	24.535	25.855	0					340	77	10	0	0	0	0.00025335
RQAELLEK	8	1	1	Unmodified	_RQAELLEK_			0	0	1	sp|Q96SB4-4|SRPK1_HUMAN;sp|Q96SB4|SRPK1_HUMAN;sp|P78362|SRPK2_HUMAN;sp|P78362-2|SRPK2_HUMAN;sp|Q96SB4-3|SRPK1_HUMAN	sp|Q96SB4-4|SRPK1_HUMAN	sp|Q96SB4-4|SRPK1_HUMAN	ISO-MSMS	0	16062020_SKO_IP_Cep78	1	exp_1	493.784	2	493.785	985.556	NaN	NaN	NaN	-1.1259	-0.00055596	NaN	NaN	NaN	NaN	NaN	8.4958	0.11436	8.4958	8.43	8.5443	0								0	0	0	0.0085377
RQQEVETELK	10	1	1	Unmodified	_RQQEVETELK_			0	0	1	sp|P08621-3|RU17_HUMAN;sp|P08621-2|RU17_HUMAN;sp|P08621|RU17_HUMAN	sp|P08621-3|RU17_HUMAN	sp|P08621-3|RU17_HUMAN	ISO-MSMS	2	16062020_SKO_IP_Cep78	1	exp_1	639.344	2	630.333	1258.65	NaN	NaN	NaN	0.78995	0.00049793	NaN	NaN	NaN	NaN	NaN	9.6317	0.16857	9.6317	9.5828	9.7514	0								0	0	0	0.0023053
RQQEVETELK	10	1	1	Unmodified	_RQQEVETELK_			0	0	1	sp|P08621-3|RU17_HUMAN;sp|P08621-2|RU17_HUMAN;sp|P08621|RU17_HUMAN	sp|P08621-3|RU17_HUMAN	sp|P08621-3|RU17_HUMAN	ISO-MSMS	0	16062020_SKO_IP_Cep78	1	exp_1	630.331	2	630.333	1258.65	NaN	NaN	NaN	-1.6522	-0.0010414	NaN	NaN	NaN	NaN	NaN	9.6484	0.15181	9.6484	9.5661	9.7179	1.7764e-15								0	0	0	3.2385e-08
RTIAQDYGVLK	11	1	1	Unmodified	_RTIAQDYGVLK_			0	0	1	sp|Q06830|PRDX1_HUMAN	sp|Q06830|PRDX1_HUMAN	sp|Q06830|PRDX1_HUMAN	MULTI-MSMS		16062020_SKO_IP_Cep78	1	exp_1	632.361	2	632.356	1262.7	35329.5	2.4869	0.0015726	-0.53432	-0.00033788	1.9526	0.0012348	632.356	637.38	641.368	26.509	0.3724	26.509	26.312	26.685	0					126	21	8	0	0	0	0.00049843
RTNSTFNQVVLK	12	1	1	Unmodified	_RTNSTFNQVVLK_			0	0	1	sp|Q07020|RL18_HUMAN;sp|Q07020-2|RL18_HUMAN	sp|Q07020|RL18_HUMAN	sp|Q07020|RL18_HUMAN	ISO-MSMS	2	16062020_SKO_IP_Cep78	1	exp_1	712.903	2	703.891	1405.77	NaN	NaN	NaN	1.2401	0.0008729	NaN	NaN	NaN	NaN	NaN	20.456	0.28672	20.456	20.357	20.644	-3.5527e-15								0	0	0	0.0044813
RTNSTFNQVVLK	12	1	1	Unmodified	_RTNSTFNQVVLK_			0	0	1	sp|Q07020|RL18_HUMAN;sp|Q07020-2|RL18_HUMAN	sp|Q07020|RL18_HUMAN	sp|Q07020|RL18_HUMAN	MSMS	0	16062020_SKO_IP_Cep78	1	exp_1	703.892	2	703.891	1405.77	NaN	NaN	NaN	NaN	NaN	NaN	NaN	NaN	NaN	NaN	20.437	1	20.437	19.937	20.937	0								0	0	0	3.8559e-14
RVLLGETGK	9	1	1	Unmodified	_RVLLGETGK_			0	0	1	sp|P62280|RS11_HUMAN	sp|P62280|RS11_HUMAN	sp|P62280|RS11_HUMAN	ISO-MSMS	2	16062020_SKO_IP_Cep78	1	exp_1	495.806	2	486.795	971.576	NaN	NaN	NaN	0.38914	0.00018943	NaN	NaN	NaN	NaN	NaN	11.201	0.43741	11.201	10.998	11.436	-1.7764e-15								0	0	0	0.012241
RVLLGETGK	9	1	1	Unmodified	_RVLLGETGK_			0	0	1	sp|P62280|RS11_HUMAN	sp|P62280|RS11_HUMAN	sp|P62280|RS11_HUMAN	ISO-MSMS	0	16062020_SKO_IP_Cep78	1	exp_1	486.796	2	486.795	971.576	NaN	NaN	NaN	0.86897	0.00042301	NaN	NaN	NaN	NaN	NaN	11.245	0.42026	11.245	11.015	11.436	0								0	0	0	2.4468e-90
RVLLGETGK	9	1	1	Unmodified	_RVLLGETGK_			0	0	1	sp|P62280|RS11_HUMAN	sp|P62280|RS11_HUMAN	sp|P62280|RS11_HUMAN	MSMS	1	16062020_SKO_IP_Cep78	1	exp_1	491.82	2	486.795	971.576	NaN	NaN	NaN	NaN	NaN	NaN	NaN	NaN	NaN	NaN	11.173	1	11.173	10.673	11.673	0								0	0	0	0.026374
RYIGIVK	7	1	1	Unmodified	_RYIGIVK_			0	0	1	sp|P52597|HNRPF_HUMAN	sp|P52597|HNRPF_HUMAN	sp|P52597|HNRPF_HUMAN	ISO-MSMS	0	16062020_SKO_IP_Cep78	1	exp_1	424.772	2	424.771	847.528	NaN	NaN	NaN	-0.79769	-0.00033883	NaN	NaN	NaN	NaN	NaN	14.319	0.1509	14.319	14.228	14.379	0								0	0	0	0.0086988
RYLEEQK	7	1	1	Unmodified	_RYLEEQK_			0	0	1	sp|Q9Y2W1|TR150_HUMAN	sp|Q9Y2W1|TR150_HUMAN	sp|Q9Y2W1|TR150_HUMAN	ISO-MSMS	0	16062020_SKO_IP_Cep78	1	exp_1	483.256	2	483.256	964.498	NaN	NaN	NaN	-0.26293	-0.00012706	NaN	NaN	NaN	NaN	NaN	6.2595	0.10051	6.2595	6.1841	6.2846	0								0	0	0	2.7167e-15
SAAMTLNER	9	0	1	Oxidation (M)	_SAAM(ox)TLNER_	SAAM(1)TLNER	SAAM(146.81)TLNER	0	1	0	sp|Q9NYF8-3|BCLF1_HUMAN;sp|Q9NYF8-2|BCLF1_HUMAN;sp|Q9NYF8|BCLF1_HUMAN;sp|Q9NYF8-4|BCLF1_HUMAN	sp|Q9NYF8-3|BCLF1_HUMAN	sp|Q9NYF8-3|BCLF1_HUMAN	MULTI-MSMS		16062020_SKO_IP_Cep78	1	exp_1	504.743	2	504.743	1007.47	39137.4	0.31138	0.00015717	-0.23516	-0.00011869	0.076228	3.8475e-05	504.743	507.752	509.747	6.9279	0.08377	6.9279	6.8697	6.9535	0					27	4	8	0	0	0	6.469e-63
SAINEVVTR	9	0	1	Unmodified	_SAINEVVTR_			0	0	0	sp|P62899-3|RL31_HUMAN;sp|P62899|RL31_HUMAN;sp|P62899-2|RL31_HUMAN	sp|P62899-3|RL31_HUMAN	sp|P62899-3|RL31_HUMAN	ISO-MSMS	2	16062020_SKO_IP_Cep78	1	exp_1	499.277	2	494.775	987.535	NaN	NaN	NaN	-1.2212	-0.0006042	NaN	NaN	NaN	NaN	NaN	19.004	0.43764	19.004	18.757	19.195	0								0	0	0	0.016805
SAINEVVTR	9	0	1	Unmodified	_SAINEVVTR_			0	0	0	sp|P62899-3|RL31_HUMAN;sp|P62899|RL31_HUMAN;sp|P62899-2|RL31_HUMAN	sp|P62899-3|RL31_HUMAN	sp|P62899-3|RL31_HUMAN	ISO-MSMS	0	16062020_SKO_IP_Cep78	1	exp_1	494.775	2	494.775	987.535	NaN	NaN	NaN	1.3558	0.00067081	NaN	NaN	NaN	NaN	NaN	19.005	0.7072	19.005	18.841	19.548	3.5527e-15								0	0	0	0.018543
SAVEDEGLK	9	1	0	Unmodified	_SAVEDEGLK_			0	0	0	sp|P0DMV9|HS71B_HUMAN;sp|P0DMV8|HS71A_HUMAN;sp|P0DMV8-2|HS71A_HUMAN	sp|P0DMV9|HS71B_HUMAN	sp|P0DMV9|HS71B_HUMAN	MULTI-MSMS		16062020_SKO_IP_Cep78	1	exp_1	476.708	2	474.238	946.461	39894.1	1.3255	0.00062858	-0.4828	-0.00022896	0.84266	0.00039962	474.237	476.25	478.244	12.632	0.77496	12.632	12.362	13.136	0					361	45	14	0	0	0	6.1524e-19
SDLLLSGR	8	0	1	Unmodified	_SDLLLSGR_			0	0	0	sp|O14744-5|ANM5_HUMAN;sp|O14744|ANM5_HUMAN;sp|O14744-3|ANM5_HUMAN;sp|O14744-2|ANM5_HUMAN;sp|O14744-4|ANM5_HUMAN	sp|O14744-5|ANM5_HUMAN	sp|O14744-5|ANM5_HUMAN	MULTI-MSMS		16062020_SKO_IP_Cep78	1	exp_1	435.85	2	430.745	859.476	41705.8	1.693	0.00072926	0.017984	7.7467e-06	1.711	0.00073701	430.745	433.756	435.75	27.521	0.70967	27.521	27.259	27.968	0					268	41	11	0	0	0	3.4988e-24
SDQSRLDSELK	11	1	1	Unmodified	_SDQSRLDSELK_			0	0	1	sp|P04264|K2C1_HUMAN;CON__P04264	sp|P04264|K2C1_HUMAN	sp|P04264|K2C1_HUMAN	ISO-MSMS	0	16062020_SKO_IP_Cep78	1	exp_1	639.32	2	639.32	1276.63	NaN	NaN	NaN	-0.55812	-0.00035681	NaN	NaN	NaN	NaN	NaN	14.957	0.30004	14.957	14.781	15.081	0								0	0	0	1.7053e-39
SEDLSVLEK	9	1	0	Unmodified	_SEDLSVLEK_			0	0	0	sp|Q8N954-2|GPT11_HUMAN;sp|Q8N954|GPT11_HUMAN	sp|Q8N954-2|GPT11_HUMAN	sp|Q8N954-2|GPT11_HUMAN	ISO-MSMS	0	16062020_SKO_IP_Cep78	1	exp_1	510.265	2	510.266	1018.52	NaN	NaN	NaN	-3.6931	-0.0018845	NaN	NaN	NaN	NaN	NaN	29.426	0.2281	29.426	29.299	29.527	3.5527e-15								0	0	0	0.018074
SEISELRR	8	0	2	Unmodified	_SEISELRR_			0	0	1	sp|P02533|K1C14_HUMAN;CON__P02533;sp|Q04695|K1C17_HUMAN;CON__Q04695;CON__Q9QWL7	sp|P02533|K1C14_HUMAN	sp|P02533|K1C14_HUMAN	ISO-MSMS	0	16062020_SKO_IP_Cep78	1	exp_1	495.272	2	495.272	988.53	NaN	NaN	NaN	-4.0371	-0.0019995	NaN	NaN	NaN	NaN	NaN	13.178	0.28595	13.178	13.052	13.338	0								0	0	0	0.0036891
SEITELRR	8	0	2	Unmodified	_SEITELRR_			0	0	1	sp|P13645|K1C10_HUMAN;CON__P13645;CON__P02535-1	sp|P13645|K1C10_HUMAN	sp|P13645|K1C10_HUMAN	ISO-MSMS	0	16062020_SKO_IP_Cep78	1	exp_1	502.28	2	502.28	1002.55	NaN	NaN	NaN	0.22295	0.00011198	NaN	NaN	NaN	NaN	NaN	14.001	0.26843	14.001	13.859	14.127	0								0	0	0	0.0050024
SFATASHRNTEEEGLK	16	1	1	Unmodified	_SFATASHRNTEEEGLK_			0	0	1	sp|Q9NYF8-3|BCLF1_HUMAN;sp|Q9NYF8-2|BCLF1_HUMAN;sp|Q9NYF8|BCLF1_HUMAN	sp|Q9NYF8-3|BCLF1_HUMAN	sp|Q9NYF8-3|BCLF1_HUMAN	ISO-MSMS	2	16062020_SKO_IP_Cep78	1	exp_1	897.942	2	888.929	1775.84	NaN	NaN	NaN	-0.59356	-0.00052763	NaN	NaN	NaN	NaN	NaN	10.658	0.15244	10.658	10.559	10.712	0								0	0	0	3.2232e-256
SGHFEQAIK	9	1	0	Unmodified	_SGHFEQAIK_			0	0	0	sp|Q01082|SPTB2_HUMAN;sp|Q01082-2|SPTB2_HUMAN;sp|Q01082-3|SPTB2_HUMAN	sp|Q01082|SPTB2_HUMAN	sp|Q01082|SPTB2_HUMAN	ISO-MSMS	0	16062020_SKO_IP_Cep78	1	exp_1	508.766	2	508.762	1015.51	NaN	NaN	NaN	2.7847	0.0014168	NaN	NaN	NaN	NaN	NaN	9.5409	0.11743	9.5409	9.4654	9.5828	0								0	0	0	0.020121
SGSALELSVENVK	13	1	0	Unmodified	_SGSALELSVENVK_			0	0	0	sp|O75688|PPM1B_HUMAN;sp|O75688-4|PPM1B_HUMAN;sp|O75688-2|PPM1B_HUMAN;sp|O75688-5|PPM1B_HUMAN	sp|O75688|PPM1B_HUMAN	sp|O75688|PPM1B_HUMAN	MULTI-MSMS		16062020_SKO_IP_Cep78	1	exp_1	668.867	2	666.854	1331.69	35140.2	2.9662	0.001978	0.11276	7.5197e-05	3.0789	0.0020532	666.853	668.866	670.861	38.918	0.34064	38.918	38.771	39.111	0					131	19	10	0	0	0	8.8219e-15
SGVGNVFIK	9	1	0	Unmodified	_SGVGNVFIK_			0	0	0	sp|Q13310-2|PABP4_HUMAN;sp|Q13310|PABP4_HUMAN;sp|Q13310-3|PABP4_HUMAN;sp|Q5JQF8|PAP1M_HUMAN	sp|Q13310-2|PABP4_HUMAN	sp|Q13310-2|PABP4_HUMAN	MULTI-MSMS		16062020_SKO_IP_Cep78	1	exp_1	460.764	2	460.764	919.513	40535.5	0.5566	0.00025646	-0.22473	-0.00010355	0.33188	0.00015292	460.764	462.775	464.771	29.566	0.32836	29.566	29.416	29.744	0					129	21	8	0	0	0	3.2322e-05
SHTILLVQPTK	11	1	0	Acetyl (Protein N-term)	_(ac)SHTILLVQPTK_			1	0	0	sp|P84090|ERH_HUMAN	sp|P84090|ERH_HUMAN	sp|P84090|ERH_HUMAN	MULTI-MSMS		16062020_SKO_IP_Cep78	1	exp_1	639.876	2	639.874	1277.73	34616.5	2.2979	0.0014704	0.82206	0.00052601	3.1199	0.0019964	639.874	641.887	643.882	40.711	0.95078	40.711	40.061	41.012	0					245	51	11	0	0	0	7.5268e-181
SIFDHIK	7	1	0	Unmodified	_SIFDHIK_			0	0	0	sp|Q9NYF8-3|BCLF1_HUMAN;sp|Q9NYF8-2|BCLF1_HUMAN;sp|Q9NYF8|BCLF1_HUMAN;sp|Q9NYF8-4|BCLF1_HUMAN	sp|Q9NYF8-3|BCLF1_HUMAN	sp|Q9NYF8-3|BCLF1_HUMAN	MULTI-MSMS		16062020_SKO_IP_Cep78	1	exp_1	430.721	2	430.237	858.46	43373	0.16759	7.2101e-05	-0.30165	-0.00012978	-0.13407	-5.7682e-05	430.237	432.25	434.244	29.328	0.41653	29.328	29.134	29.551	0					263	41	9	0	0	0	0.011747
SILPTAPR	8	0	1	Unmodified	_SILPTAPR_			0	0	0	sp|P23588|IF4B_HUMAN;sp|P23588-2|IF4B_HUMAN	sp|P23588|IF4B_HUMAN	sp|P23588|IF4B_HUMAN	MULTI-MSMS		16062020_SKO_IP_Cep78	1	exp_1	427.76	2	427.758	853.502	42002.1	1.9809	0.00084733	-0.13078	-5.5944e-05	1.8501	0.00079138	427.758	430.767	432.762	26.494	0.77868	26.494	26.058	26.837	0					361	45	12	0	0	0	0.0082533
SISLYYTGEK	10	1	0	Unmodified	_SISLYYTGEK_			0	0	0	sp|P19338|NUCL_HUMAN	sp|P19338|NUCL_HUMAN	sp|P19338|NUCL_HUMAN	ISO-MSMS	2	16062020_SKO_IP_Cep78	1	exp_1	584.806	2	580.795	1159.58	NaN	NaN	NaN	1.9135	0.0011114	NaN	NaN	NaN	NaN	NaN	33.561	0.42483	33.561	33.364	33.789	7.1054e-15								0	0	0	0.01625
SISLYYTGEK	10	1	0	Unmodified	_SISLYYTGEK_			0	0	0	sp|P19338|NUCL_HUMAN	sp|P19338|NUCL_HUMAN	sp|P19338|NUCL_HUMAN	ISO-MSMS	0	16062020_SKO_IP_Cep78	1	exp_1	580.796	2	580.795	1159.58	NaN	NaN	NaN	4.0848	0.0023724	NaN	NaN	NaN	NaN	NaN	33.553	0.3903	33.553	33.347	33.737	0								0	0	0	0.0072222
SKAEAESLYQSK	12	2	0	Unmodified	_SKAEAESLYQSK_			0	0	1	sp|P04264|K2C1_HUMAN;CON__P04264	sp|P04264|K2C1_HUMAN	sp|P04264|K2C1_HUMAN	ISO-MSMS	0	16062020_SKO_IP_Cep78	1	exp_1	670.836	2	670.838	1339.66	NaN	NaN	NaN	-3.1801	-0.0021334	NaN	NaN	NaN	NaN	NaN	10.86	0.28674	10.86	10.678	10.965	1.7764e-15								0	0	0	3.9509e-10
SLENETLNK	9	1	0	Unmodified	_SLENETLNK_			0	0	0	sp|P23588|IF4B_HUMAN;sp|P23588-2|IF4B_HUMAN	sp|P23588|IF4B_HUMAN	sp|P23588|IF4B_HUMAN	MULTI-MSMS		16062020_SKO_IP_Cep78	1	exp_1	526.282	2	524.269	1046.52	38333.1	-0.30532	-0.00016007	-0.31984	-0.00016768	-0.62516	-0.00032775	524.269	526.282	528.276	14.906	0.94219	14.906	14.48	15.422	-1.7764e-15					301	57	14	0	0	0	8.8014e-50
SLHTLFGDK	9	1	0	Unmodified	_SLHTLFGDK_			0	0	0	sp|P02768|ALBU_HUMAN;CON__P02768-1;sp|P02768-3|ALBU_HUMAN	sp|P02768|ALBU_HUMAN	sp|P02768|ALBU_HUMAN	ISO-MSMS	0	16062020_SKO_IP_Cep78	1	exp_1	509.274	2	509.272	1016.53	NaN	NaN	NaN	-0.24645	-0.00012551	NaN	NaN	NaN	NaN	NaN	26.49	0.57593	26.49	26.227	26.803	0								0	0	0	0.019942
SLLEGEGSSGGGGR	14	0	1	Unmodified	_SLLEGEGSSGGGGR_			0	0	0	sp|P13645|K1C10_HUMAN;CON__P13645	sp|P13645|K1C10_HUMAN	sp|P13645|K1C10_HUMAN	ISO-MSMS	0	16062020_SKO_IP_Cep78	1	exp_1	631.801	2	631.802	1261.59	NaN	NaN	NaN	0.25068	0.00015838	NaN	NaN	NaN	NaN	NaN	16.619	0.25242	16.619	16.483	16.735	0								0	0	0	0.00065996
SLLNKPK	7	2	0	Acetyl (Protein N-term)	_(ac)SLLNKPK_			1	0	1	sp|P62316|SMD2_HUMAN	sp|P62316|SMD2_HUMAN	sp|P62316|SMD2_HUMAN	MULTI-MSMS		16062020_SKO_IP_Cep78	1	exp_1	429.276	2	421.261	840.507	42104.5	2.4117	0.001016	-0.49364	-0.00020795	1.9181	0.000808	421.261	425.286	429.275	17.516	0.37093	17.516	17.376	17.747	0					110	21	9	0	0	0	4.7514e-05
SLLVQTK	7	1	0	Unmodified	_SLLVQTK_			0	0	0	sp|P39023|RL3_HUMAN	sp|P39023|RL3_HUMAN	sp|P39023|RL3_HUMAN	MULTI-MSMS		16062020_SKO_IP_Cep78	1	exp_1	394.747	2	394.747	787.48	43937.5	1.7408	0.00068718	-0.64179	-0.00025334	1.099	0.00043384	394.747	396.76	398.754	17.04	0.37023	17.04	16.871	17.241	0					141	21	10	0	0	0	1.0297e-14
SLQESLQK	8	1	0	Unmodified	_SLQESLQK_			0	0	0	sp|Q13464|ROCK1_HUMAN	sp|Q13464|ROCK1_HUMAN	sp|Q13464|ROCK1_HUMAN	ISO-MSMS	0	16062020_SKO_IP_Cep78	1	exp_1	466.757	2	466.756	931.497	NaN	NaN	NaN	-2.4658	-0.0011509	NaN	NaN	NaN	NaN	NaN	14.458	0.16768	14.458	14.346	14.513	1.7764e-15								0	0	0	0.0072554
SLQSVAEER	9	0	1	Unmodified	_SLQSVAEER_			0	0	0	sp|P61313|RL15_HUMAN;sp|P61313-2|RL15_HUMAN	sp|P61313|RL15_HUMAN	sp|P61313|RL15_HUMAN	MULTI-MSMS		16062020_SKO_IP_Cep78	1	exp_1	509.763	2	509.762	1017.51	38799.6	0.94332	0.00048087	0.58547	0.00029845	1.5288	0.00077932	509.763	512.773	514.766	16.013	0.53839	16.013	15.759	16.298	0					152	31	9	0	0	0	2.6193e-06
SLSYSPVER	9	0	1	Unmodified	_SLSYSPVER_			0	0	0	sp|Q9UQ35|SRRM2_HUMAN;sp|Q9UQ35-2|SRRM2_HUMAN	sp|Q9UQ35|SRRM2_HUMAN	sp|Q9UQ35|SRRM2_HUMAN	MULTI-MSMS		16062020_SKO_IP_Cep78	1	exp_1	519.267	2	519.267	1036.52	38432.5	1.1966	0.00062134	-0.097486	-5.0621e-05	1.0991	0.00057072	519.267	522.277	524.27	20.495	0.33747	20.495	20.307	20.644	0					65	15	7	0	0	0	4.324e-05
SLVGLGGTK	9	1	0	Unmodified	_SLVGLGGTK_			0	0	0	sp|P35908|K22E_HUMAN;CON__P35908v2;CON__P35908	sp|P35908|K22E_HUMAN	sp|P35908|K22E_HUMAN	ISO-MSMS	0	16062020_SKO_IP_Cep78	1	exp_1	416.251	2	416.25	830.486	NaN	NaN	NaN	-0.25622	-0.00010665	NaN	NaN	NaN	NaN	NaN	20.698	0.23512	20.698	20.543	20.778	3.5527e-15								0	0	0	0.012631
SLVNLGGSK	9	1	0	Unmodified	_SLVNLGGSK_			0	0	0	sp|P04264|K2C1_HUMAN;CON__P04264	sp|P04264|K2C1_HUMAN	sp|P04264|K2C1_HUMAN	ISO-MSMS	0	16062020_SKO_IP_Cep78	1	exp_1	437.754	2	437.753	873.492	NaN	NaN	NaN	-0.7284	-0.00031886	NaN	NaN	NaN	NaN	NaN	20.804	0.15107	20.804	20.695	20.846	0								0	0	0	0.014401
SLYNLGGSK	9	1	0	Unmodified	_SLYNLGGSK_			0	0	0	CON__Q5XQN5;sp|P13647|K2C5_HUMAN;CON__P13647	CON__Q5XQN5;sp|P13647|K2C5_HUMAN	CON__Q5XQN5	ISO-MSMS	0	16062020_SKO_IP_Cep78	1	exp_1	469.75	2	469.751	937.487	NaN	NaN	NaN	-0.47292	-0.00022215	NaN	NaN	NaN	NaN	NaN	20.902	0.19223	20.902	20.795	20.987	0								0	0	0	0.024313
SNLELFK	7	1	0	Unmodified	_SNLELFK_			0	0	0	sp|O15042-2|SR140_HUMAN;sp|O15042|SR140_HUMAN	sp|O15042-2|SR140_HUMAN	sp|O15042-2|SR140_HUMAN	MULTI-MSMS		16062020_SKO_IP_Cep78	1	exp_1	425.738	2	425.737	849.46	42841.6	2.3304	0.00099215	-1.8097	-0.00077045	0.52075	0.0002217	425.736	427.749	429.743	34.56	0.42263	34.56	34.316	34.738	0					136	24	9	0	0	0	0.0045517
SNYNLPMHK	9	1	0	Oxidation (M)	_SNYNLPM(ox)HK_	SNYNLPM(1)HK	SNYNLPM(95.61)HK	0	1	0	sp|P36578|RL4_HUMAN	sp|P36578|RL4_HUMAN	sp|P36578|RL4_HUMAN	ISO-MSMS	0	16062020_SKO_IP_Cep78	1	exp_1	560.284	2	560.266	1118.52	NaN	NaN	NaN	0.22256	0.00012469	NaN	NaN	NaN	NaN	NaN	11.736	0.43693	11.736	11.503	11.94	0								0	0	0	0.0096612
SPFEQHIK	8	1	0	Unmodified	_SPFEQHIK_			0	0	0	sp|Q92520|FAM3C_HUMAN	sp|Q92520|FAM3C_HUMAN	sp|Q92520|FAM3C_HUMAN	ISO-MSMS	0	16062020_SKO_IP_Cep78	1	exp_1	493.76	2	493.259	984.503	NaN	NaN	NaN	-0.16737	-8.2559e-05	NaN	NaN	NaN	NaN	NaN	13.676	0.28579	13.676	13.54	13.825	0								0	0	0	0.00063118
SPLQSVVVR	9	0	1	Unmodified	_SPLQSVVVR_			0	0	0	sp|Q9Y2W1|TR150_HUMAN	sp|Q9Y2W1|TR150_HUMAN	sp|Q9Y2W1|TR150_HUMAN	MULTI-MSMS		16062020_SKO_IP_Cep78	1	exp_1	492.797	2	492.795	983.576	39618.6	1.48	0.00072934	-0.29073	-0.00014327	1.1893	0.00058607	492.796	495.805	497.799	27.544	0.45584	27.544	27.276	27.732	0					201	26	11	0	0	0	2.1218e-49
SPSDSGYSYETIGK	14	1	0	Unmodified	_SPSDSGYSYETIGK_			0	0	0	sp|P46821|MAP1B_HUMAN	sp|P46821|MAP1B_HUMAN	sp|P46821|MAP1B_HUMAN	ISO-MSMS	0	16062020_SKO_IP_Cep78	1	exp_1	745.838	2	745.836	1489.66	NaN	NaN	NaN	-1.3505	-0.0010072	NaN	NaN	NaN	NaN	NaN	25.738	0.18592	25.738	25.601	25.787	3.5527e-15								0	0	0	9.3875e-20
SPSDSGYSYETIGK	14	1	0	Unmodified	_SPSDSGYSYETIGK_			0	0	0	sp|P46821|MAP1B_HUMAN	sp|P46821|MAP1B_HUMAN	sp|P46821|MAP1B_HUMAN	ISO-MSMS	2	16062020_SKO_IP_Cep78	1	exp_1	749.845	2	745.836	1489.66	NaN	NaN	NaN	1.1654	0.00086917	NaN	NaN	NaN	NaN	NaN	25.703	0.13513	25.703	25.635	25.77	0								0	0	0	0.0010307
SQDIYLR	7	0	1	Unmodified	_SQDIYLR_			0	0	0	sp|Q07020|RL18_HUMAN	sp|Q07020|RL18_HUMAN	sp|Q07020|RL18_HUMAN	MULTI-MSMS		16062020_SKO_IP_Cep78	1	exp_1	450.748	2	447.738	893.461	40499.6	0.45614	0.00020423	-0.2919	-0.00013069	0.16424	7.3536e-05	447.738	450.748	452.742	19.25	0.37007	19.25	19.06	19.43	0					150	21	10	0	0	0	3.4892e-22
SQRYESLK	8	1	1	Unmodified	_SQRYESLK_			0	0	1	sp|P47914|RL29_HUMAN	sp|P47914|RL29_HUMAN	sp|P47914|RL29_HUMAN	MULTI-MSMS		16062020_SKO_IP_Cep78	1	exp_1	514.779	2	505.767	1009.52	42766.2	0.4594	0.00023235	-0.40315	-0.0002039	0.056248	2.8448e-05	505.767	510.79	514.778	6.5215	0.18437	6.5215	6.3851	6.5695	0					51	9	10	0	0	0	0.0052442
SQSSDTEQQSPTSGGGK	17	1	0	Unmodified	_SQSSDTEQQSPTSGGGK_			0	0	0	sp|P23588|IF4B_HUMAN;sp|P23588-2|IF4B_HUMAN	sp|P23588|IF4B_HUMAN	sp|P23588|IF4B_HUMAN	ISO-MSMS	0	16062020_SKO_IP_Cep78	1	exp_1	840.868	2	840.869	1679.72	NaN	NaN	NaN	-0.61402	-0.00051631	NaN	NaN	NaN	NaN	NaN	5.9882	0.13414	5.9882	5.9159	6.05	0								0	0	0	0
SRDSFLK	7	1	1	Unmodified	_SRDSFLK_			0	0	1	sp|P46778|RL21_HUMAN	sp|P46778|RL21_HUMAN	sp|P46778|RL21_HUMAN	MSMS	0	16062020_SKO_IP_Cep78	1	exp_1	426.733	2	426.732	851.45	NaN	NaN	NaN	NaN	NaN	NaN	NaN	NaN	NaN	NaN	8.1536	1	8.1536	7.6536	8.6536	0								0	0	0	0.016609
SSEEIESAFR	10	0	1	Unmodified	_SSEEIESAFR_			0	0	0	sp|Q13813-3|SPTN1_HUMAN;sp|Q13813|SPTN1_HUMAN;sp|Q13813-2|SPTN1_HUMAN	sp|Q13813-3|SPTN1_HUMAN	sp|Q13813-3|SPTN1_HUMAN	ISO-MSMS	0	16062020_SKO_IP_Cep78	1	exp_1	577.769	2	577.77	1153.53	NaN	NaN	NaN	-0.69374	-0.00040082	NaN	NaN	NaN	NaN	NaN	27.901	0.21933	27.901	27.816	28.035	0								0	0	0	0.017203
SSEEIESAFR	10	0	1	Unmodified	_SSEEIESAFR_			0	0	0	sp|Q13813-3|SPTN1_HUMAN;sp|Q13813|SPTN1_HUMAN;sp|Q13813-2|SPTN1_HUMAN	sp|Q13813-3|SPTN1_HUMAN	sp|Q13813-3|SPTN1_HUMAN	ISO-MSMS	2	16062020_SKO_IP_Cep78	1	exp_1	582.774	2	577.77	1153.53	NaN	NaN	NaN	0.6768	0.00039104	NaN	NaN	NaN	NaN	NaN	27.943	0.21933	27.943	27.816	28.035	0								0	0	0	0.0061324
SSFSITR	7	0	1	Unmodified	_SSFSITR_			0	0	0	sp|Q9Y2W1|TR150_HUMAN	sp|Q9Y2W1|TR150_HUMAN	sp|Q9Y2W1|TR150_HUMAN	ISO-MSMS	0	16062020_SKO_IP_Cep78	1	exp_1	399.211	2	399.211	796.408	NaN	NaN	NaN	0.60391	0.00024109	NaN	NaN	NaN	NaN	NaN	18.31	0.42169	18.31	18.1	18.521	0								0	0	0	5.0535e-05
SSFYPDGGDQETAK	14	1	0	Unmodified	_SSFYPDGGDQETAK_			0	0	0	sp|Q9NYF8-3|BCLF1_HUMAN;sp|Q9NYF8-2|BCLF1_HUMAN;sp|Q9NYF8|BCLF1_HUMAN;sp|Q9NYF8-4|BCLF1_HUMAN	sp|Q9NYF8-3|BCLF1_HUMAN	sp|Q9NYF8-3|BCLF1_HUMAN	MULTI-MSMS		16062020_SKO_IP_Cep78	1	exp_1	751.829	2	751.326	1500.64	32215.5	1.3525	0.0010162	-0.42392	-0.0003185	0.92861	0.00069769	751.326	753.338	755.331	20.69	0.2183	20.69	20.56	20.778	3.5527e-15					98	12	12	0	0	0	2.0621e-33
SSQDHVDEEVFK	12	1	0	Unmodified	_SSQDHVDEEVFK_			0	0	0	sp|Q9BRS2|RIOK1_HUMAN	sp|Q9BRS2|RIOK1_HUMAN	sp|Q9BRS2|RIOK1_HUMAN	ISO-MSMS	1	16062020_SKO_IP_Cep78	1	exp_1	712.334	2	710.323	1418.63	NaN	NaN	NaN	-0.50275	-0.00035711	NaN	NaN	NaN	NaN	NaN	19.311	0.28643	19.311	19.178	19.464	-3.5527e-15								0	0	0	0.0012267
SSQDHVDEEVFK	12	1	0	Unmodified	_SSQDHVDEEVFK_			0	0	0	sp|Q9BRS2|RIOK1_HUMAN	sp|Q9BRS2|RIOK1_HUMAN	sp|Q9BRS2|RIOK1_HUMAN	ISO-MSMS	0	16062020_SKO_IP_Cep78	1	exp_1	710.825	2	710.323	1418.63	NaN	NaN	NaN	-0.60567	-0.00043022	NaN	NaN	NaN	NaN	NaN	19.358	0.2696	19.358	19.195	19.464	0								0	0	0	0.0011603
SSQGSEFLEEPDK	13	1	0	Unmodified	_SSQGSEFLEEPDK_			0	0	0	sp|Q5W0B1|RN219_HUMAN	sp|Q5W0B1|RN219_HUMAN	sp|Q5W0B1|RN219_HUMAN	ISO-MSMS	0	16062020_SKO_IP_Cep78	1	exp_1	726.829	2	726.828	1451.64	NaN	NaN	NaN	1.2381	0.00089988	NaN	NaN	NaN	NaN	NaN	26.113	0.2371	26.113	26.024	26.261	0								0	0	0	0.0019114
STAGDTHLGGEDFDNR	16	0	1	Unmodified	_STAGDTHLGGEDFDNR_			0	0	0	sp|P11142|HSP7C_HUMAN;sp|P11142-2|HSP7C_HUMAN;sp|P54652|HSP72_HUMAN	sp|P11142|HSP7C_HUMAN	sp|P11142|HSP7C_HUMAN	MULTI-MSMS		16062020_SKO_IP_Cep78	1	exp_1	851.372	2	846.366	1690.72	30651.7	-0.67899	-0.00057468	0.97842	0.0008281	0.29943	0.00025342	846.367	849.378	851.372	19.204	0.31933	19.204	19.043	19.363	-3.5527e-15					133	18	12	0	0	0	0
STDFAPIK	8	1	0	Unmodified	_STDFAPIK_			0	0	0	sp|P46821|MAP1B_HUMAN	sp|P46821|MAP1B_HUMAN	sp|P46821|MAP1B_HUMAN	ISO-MSMS	0	16062020_SKO_IP_Cep78	1	exp_1	439.923	2	439.735	877.455	NaN	NaN	NaN	0.35871	0.00015774	NaN	NaN	NaN	NaN	NaN	22.33	0.6627	22.33	22.081	22.744	0								0	0	0	0.011386
STELLIRK	8	1	1	Unmodified	_STELLIRK_			0	0	1	sp|Q6NXT2|H3C_HUMAN;sp|Q71DI3|H32_HUMAN;sp|Q16695|H31T_HUMAN;sp|P84243|H33_HUMAN;sp|P68431|H31_HUMAN	sp|Q6NXT2|H3C_HUMAN	sp|Q6NXT2|H3C_HUMAN	ISO-MSMS	2	16062020_SKO_IP_Cep78	1	exp_1	489.31	2	480.298	958.581	NaN	NaN	NaN	0.34877	0.00016751	NaN	NaN	NaN	NaN	NaN	15.536	0.21879	15.536	15.405	15.624	-1.7764e-15								0	0	0	0.017249
STELLIRK	8	1	1	Unmodified	_STELLIRK_			0	0	1	sp|Q6NXT2|H3C_HUMAN;sp|Q71DI3|H32_HUMAN;sp|Q16695|H31T_HUMAN;sp|P84243|H33_HUMAN;sp|P68431|H31_HUMAN	sp|Q6NXT2|H3C_HUMAN	sp|Q6NXT2|H3C_HUMAN	ISO-MSMS	0	16062020_SKO_IP_Cep78	1	exp_1	480.3	2	480.298	958.581	NaN	NaN	NaN	0.9032	0.0004338	NaN	NaN	NaN	NaN	NaN	15.525	0.23558	15.525	15.405	15.641	1.7764e-15								0	0	0	0.0048137
STESLQANVQR	11	0	1	Unmodified	_STESLQANVQR_			0	0	0	sp|P26373|RL13_HUMAN	sp|P26373|RL13_HUMAN	sp|P26373|RL13_HUMAN	ISO-MSMS	2	16062020_SKO_IP_Cep78	1	exp_1	621.819	2	616.815	1231.62	NaN	NaN	NaN	0.47635	0.00029382	NaN	NaN	NaN	NaN	NaN	14.651	0.35184	14.651	14.53	14.882	-1.7764e-15								0	0	0	8.1241e-06
STLEPVEK	8	1	0	Unmodified	_STLEPVEK_			0	0	0	sp|P0DMV9|HS71B_HUMAN;sp|P0DMV8|HS71A_HUMAN;sp|P0DMV8-2|HS71A_HUMAN;sp|P17066|HSP76_HUMAN;sp|P48741|HSP77_HUMAN	sp|P0DMV9|HS71B_HUMAN;sp|P17066|HSP76_HUMAN	sp|P0DMV9|HS71B_HUMAN	MULTI-MSMS		16062020_SKO_IP_Cep78	1	exp_1	451.744	2	451.745	901.476	41053.7	1.3019	0.00058811	-0.20093	-9.0767e-05	1.1009	0.00049734	451.745	453.757	455.752	13.242	0.55453	13.242	13.035	13.59	0					178	32	8	0	0	0	0.00099385
STMQELNSR	9	0	1	Oxidation (M)	_STM(ox)QELNSR_	STM(1)QELNSR	STM(134.48)QELNSR	0	1	0	sp|P35527|K1C9_HUMAN;CON__P35527	sp|P35527|K1C9_HUMAN	sp|P35527|K1C9_HUMAN	ISO-MSMS	0	16062020_SKO_IP_Cep78	1	exp_1	541.25	2	541.251	1080.49	NaN	NaN	NaN	-0.24939	-0.00013498	NaN	NaN	NaN	NaN	NaN	6.293	0.134	6.293	6.2176	6.3516	0								0	0	0	0.0081343
STTTGHLIYK	10	1	0	Unmodified	_STTTGHLIYK_			0	0	0	sp|Q5VTE0|EF1A3_HUMAN;sp|P68104|EF1A1_HUMAN;sp|P68104-2|EF1A1_HUMAN;sp|Q05639|EF1A2_HUMAN	sp|Q5VTE0|EF1A3_HUMAN	sp|Q5VTE0|EF1A3_HUMAN	MULTI-MSMS		16062020_SKO_IP_Cep78	1	exp_1	564.959	2	560.803	1119.59	37905.3	1.1492	0.00064449	0.25643	0.00014381	1.4057	0.00078829	560.803	562.815	564.81	12.632	0.37091	12.632	12.445	12.816	0					130	21	9	0	0	0	5.9681e-50
SVDETLR	7	0	1	Unmodified	_SVDETLR_			0	0	0	sp|Q06830|PRDX1_HUMAN;sp|Q13162|PRDX4_HUMAN	sp|Q06830|PRDX1_HUMAN	sp|Q06830|PRDX1_HUMAN	MULTI-MSMS		16062020_SKO_IP_Cep78	1	exp_1	410.215	2	410.214	818.413	43522.6	1.4679	0.00060213	-0.60377	-0.00024768	0.86408	0.00035446	410.214	413.224	415.218	12.124	0.53921	12.124	11.721	12.26	-1.7764e-15					126	31	8	0	0	0	8.8972e-32
SVNELIYK	8	1	0	Unmodified	_SVNELIYK_			0	0	0	sp|P18124|RL7_HUMAN	sp|P18124|RL7_HUMAN	sp|P18124|RL7_HUMAN	MULTI-MSMS		16062020_SKO_IP_Cep78	1	exp_1	483.27	2	483.269	964.523	39141.2	2.0718	0.0010012	0.44079	0.00021302	2.5126	0.0012143	483.268	485.282	487.276	26.58	0.64284	26.58	26.261	26.904	0					209	37	12	0	0	0	0.0065883
SYLYPSTLVR	10	0	1	Unmodified	_SYLYPSTLVR_			0	0	0	sp|P52732|KIF11_HUMAN	sp|P52732|KIF11_HUMAN	sp|P52732|KIF11_HUMAN	MULTI-MSMS		16062020_SKO_IP_Cep78	1	exp_1	600.332	2	599.827	1197.64	37462.6	1.8467	0.0011077	0.98083	0.00058833	2.8276	0.0016961	599.827	602.836	604.831	44.069	0.70561	44.069	43.515	44.221	0					83	41	6	0	0	0	0.014011
SYSFIAR	7	0	1	Unmodified	_SYSFIAR_			0	0	0	sp|Q8IWX8|CHERP_HUMAN	sp|Q8IWX8|CHERP_HUMAN	sp|Q8IWX8|CHERP_HUMAN	MULTI-MSMS		16062020_SKO_IP_Cep78	1	exp_1	422.222	2	422.222	842.429	42981.6	1.9205	0.0008109	1.0637	0.00044913	2.9843	0.00126	422.222	425.232	427.226	26.129	0.44117	26.129	25.922	26.364	0					180	25	10	0	0	0	3.9873e-09
TADEVPLK	8	1	0	Unmodified	_TADEVPLK_			0	0	0	sp|Q9NZI8|IF2B1_HUMAN	sp|Q9NZI8|IF2B1_HUMAN	sp|Q9NZI8|IF2B1_HUMAN	MULTI-MSMS		16062020_SKO_IP_Cep78	1	exp_1	440.748	2	436.74	871.465	41786.9	-0.24352	-0.00010636	0.6835	0.00029851	0.43998	0.00019216	436.74	438.753	440.747	16.228	0.35321	16.228	15.995	16.348	0					119	20	9	0	0	0	0.0041998
TDGPVFHSNTLER	13	0	1	Unmodified	_TDGPVFHSNTLER_			0	0	0	sp|Q4VCS5-2|AMOT_HUMAN;sp|Q4VCS5|AMOT_HUMAN	sp|Q4VCS5-2|AMOT_HUMAN	sp|Q4VCS5-2|AMOT_HUMAN	ISO-MSMS	1	16062020_SKO_IP_Cep78	1	exp_1	740.37	2	736.86	1471.71	NaN	NaN	NaN	-0.84913	-0.00062569	NaN	NaN	NaN	NaN	NaN	21.232	0.37635	21.232	21.064	21.44	0								0	0	0	1.1263e-274
TDGPVFHSNTLER	13	0	1	Unmodified	_TDGPVFHSNTLER_			0	0	0	sp|Q4VCS5-2|AMOT_HUMAN;sp|Q4VCS5|AMOT_HUMAN	sp|Q4VCS5-2|AMOT_HUMAN	sp|Q4VCS5-2|AMOT_HUMAN	ISO-MSMS	0	16062020_SKO_IP_Cep78	1	exp_1	737.313	2	736.86	1471.71	NaN	NaN	NaN	0.66895	0.00049292	NaN	NaN	NaN	NaN	NaN	21.224	0.36446	21.224	21.053	21.417	0								0	0	0	9.4343e-20
TDLFYERK	8	1	1	Unmodified	_TDLFYERK_			0	0	1	sp|Q7RTV0|PHF5A_HUMAN	sp|Q7RTV0|PHF5A_HUMAN	sp|Q7RTV0|PHF5A_HUMAN	MULTI-MSMS		16062020_SKO_IP_Cep78	1	exp_1	545.289	2	536.277	1070.54	38378.6	0.52309	0.00028052	0.28718	0.00015401	0.81027	0.00043453	536.277	541.302	545.289	19.673	0.42153	19.673	19.498	19.919	0					141	21	11	0	0	0	1.1322e-06
TEELEEESFPER	12	0	1	Unmodified	_TEELEEESFPER_			0	0	0	sp|Q9Y2W1|TR150_HUMAN	sp|Q9Y2W1|TR150_HUMAN	sp|Q9Y2W1|TR150_HUMAN	ISO-MSMS	2	16062020_SKO_IP_Cep78	1	exp_1	753.338	2	747.833	1493.65	NaN	NaN	NaN	1.8783	0.0014047	NaN	NaN	NaN	NaN	NaN	30.821	0.5267	30.821	30.589	31.115	0								0	0	0	0.00037893
TEELEEESFPER	12	0	1	Unmodified	_TEELEEESFPER_			0	0	0	sp|Q9Y2W1|TR150_HUMAN	sp|Q9Y2W1|TR150_HUMAN	sp|Q9Y2W1|TR150_HUMAN	ISO-MSMS	0	16062020_SKO_IP_Cep78	1	exp_1	748.332	2	747.833	1493.65	NaN	NaN	NaN	0.534	0.00039935	NaN	NaN	NaN	NaN	NaN	30.838	0.62805	30.838	30.521	31.149	0								0	0	0	0.0028313
TELNLSK	7	1	0	Unmodified	_TELNLSK_			0	0	0	sp|Q5W0B1|RN219_HUMAN	sp|Q5W0B1|RN219_HUMAN	sp|Q5W0B1|RN219_HUMAN	MULTI-MSMS		16062020_SKO_IP_Cep78	1	exp_1	406.734	2	402.727	803.439	45456.3	-0.72627	-0.00029249	1.4932	0.00060134	0.7669	0.00030885	402.727	404.74	406.734	14.801	0.21884	14.801	14.697	14.915	-1.7764e-15					70	12	8	0	0	0	3.2026e-15
TEQLSCMRPAK	11	1	1	Oxidation (M)	_TEQLSCM(ox)RPAK_	TEQLSCM(1)RPAK	TEQLSCM(87.26)RPAK	0	1	1	sp|Q4VCS5-2|AMOT_HUMAN;sp|Q4VCS5|AMOT_HUMAN	sp|Q4VCS5-2|AMOT_HUMAN	sp|Q4VCS5-2|AMOT_HUMAN	MSMS	0	16062020_SKO_IP_Cep78	1	exp_1	668.824	2	668.821	1335.63	NaN	NaN	NaN	NaN	NaN	NaN	NaN	NaN	NaN	NaN	9.3412	1	9.3412	8.8412	9.8412	0								0	0	0	0.0011933
TFDQLTPEESK	11	1	0	Unmodified	_TFDQLTPEESK_			0	0	0	sp|O43852-12|CALU_HUMAN;sp|O43852-13|CALU_HUMAN;sp|O43852-14|CALU_HUMAN;sp|O43852-9|CALU_HUMAN;sp|O43852-7|CALU_HUMAN;sp|O43852-11|CALU_HUMAN;sp|O43852-8|CALU_HUMAN;sp|O43852-10|CALU_HUMAN;sp|O43852-5|CALU_HUMAN;sp|O43852-6|CALU_HUMAN;sp|O43852-2|CALU_HUMAN;sp|O43852|CALU_HUMAN;sp|O43852-4|CALU_HUMAN;sp|O43852-3|CALU_HUMAN	sp|O43852-12|CALU_HUMAN	sp|O43852-12|CALU_HUMAN	ISO-MSMS	0	16062020_SKO_IP_Cep78	1	exp_1	648.316	2	647.812	1293.61	NaN	NaN	NaN	0.99965	0.00064759	NaN	NaN	NaN	NaN	NaN	26.75	0.28748	26.75	26.566	26.854	0								0	0	0	0.0055985
TGEVLDTK	8	1	0	Unmodified	_TGEVLDTK_			0	0	0	sp|Q92520|FAM3C_HUMAN	sp|Q92520|FAM3C_HUMAN	sp|Q92520|FAM3C_HUMAN	MSMS	0	16062020_SKO_IP_Cep78	1	exp_1	431.73	2	431.729	861.444	NaN	NaN	NaN	NaN	NaN	NaN	NaN	NaN	NaN	NaN	9.8761	1	9.8761	9.3761	10.376	0								0	0	0	0.00058694
TGHYLTVK	8	1	0	Unmodified	_TGHYLTVK_			0	0	0	sp|O43143|DHX15_HUMAN	sp|O43143|DHX15_HUMAN	sp|O43143|DHX15_HUMAN	MSMS	2	16062020_SKO_IP_Cep78	1	exp_1	463.761	2	459.756	917.497	NaN	NaN	NaN	NaN	NaN	NaN	NaN	NaN	NaN	NaN	9.6307	1	9.6307	9.1307	10.131	0								0	0	0	0.0077028
TGISDVFAK	9	1	0	Unmodified	_TGISDVFAK_			0	0	0	sp|P19338|NUCL_HUMAN	sp|P19338|NUCL_HUMAN	sp|P19338|NUCL_HUMAN	MULTI-MSMS		16062020_SKO_IP_Cep78	1	exp_1	473.26	2	469.253	936.492	40304.5	3.0265	0.0014202	-1.9848	-0.00093139	1.0417	0.00048881	469.253	471.266	473.259	38.104	0.57814	38.104	37.871	38.449	7.1054e-15					244	33	11	0	0	0	0.019253
TGSESSQTGTSTTSSR	16	0	1	Unmodified	_TGSESSQTGTSTTSSR_			0	0	0	sp|P23588|IF4B_HUMAN;sp|P23588-2|IF4B_HUMAN	sp|P23588|IF4B_HUMAN	sp|P23588|IF4B_HUMAN	ISO-MSMS	2	16062020_SKO_IP_Cep78	1	exp_1	792.353	2	787.35	1572.69	NaN	NaN	NaN	1.0608	0.00083519	NaN	NaN	NaN	NaN	NaN	3.2747	0.38047	3.2747	2.9689	3.3494	0								0	0	0	2.5974e-25
TGSESSQTGTSTTSSR	16	0	1	Unmodified	_TGSESSQTGTSTTSSR_			0	0	0	sp|P23588|IF4B_HUMAN;sp|P23588-2|IF4B_HUMAN	sp|P23588|IF4B_HUMAN	sp|P23588|IF4B_HUMAN	ISO-MSMS	0	16062020_SKO_IP_Cep78	1	exp_1	787.35	2	787.35	1572.69	NaN	NaN	NaN	1.7298	0.001362	NaN	NaN	NaN	NaN	NaN	3.9365	0.3457	3.9365	3.8564	4.2021	0								0	0	0	3.0503e-256
TGSESSQTGTSTTSSR	16	0	1	Unmodified	_TGSESSQTGTSTTSSR_			0	0	0	sp|P23588|IF4B_HUMAN;sp|P23588-2|IF4B_HUMAN	sp|P23588|IF4B_HUMAN	sp|P23588|IF4B_HUMAN	ISO-MSMS	2	16062020_SKO_IP_Cep78	1	exp_1	792.357	2	787.35	1572.69	NaN	NaN	NaN	0.73708	0.00058034	NaN	NaN	NaN	NaN	NaN	4.0518	0.17334	4.0518	3.995	4.1683	0								0	0	0	3.7204e-68
TGSESSQTGTSTTSSR	16	0	1	Unmodified	_TGSESSQTGTSTTSSR_			0	0	0	sp|P23588|IF4B_HUMAN;sp|P23588-2|IF4B_HUMAN	sp|P23588|IF4B_HUMAN	sp|P23588|IF4B_HUMAN	ISO-MSMS	2	16062020_SKO_IP_Cep78	1	exp_1	792.357	2	787.35	1572.69	NaN	NaN	NaN	0.8608	0.00067775	NaN	NaN	NaN	NaN	NaN	4.8709	0.34975	4.8709	4.6931	5.0428	0								0	0	0	7.2771e-25
TGSESSQTGTSTTSSR	16	0	1	Unmodified	_TGSESSQTGTSTTSSR_			0	0	0	sp|P23588|IF4B_HUMAN;sp|P23588-2|IF4B_HUMAN	sp|P23588|IF4B_HUMAN	sp|P23588|IF4B_HUMAN	MSMS	1	16062020_SKO_IP_Cep78	1	exp_1	790.362	2	787.35	1572.69	NaN	NaN	NaN	NaN	NaN	NaN	NaN	NaN	NaN	NaN	3.1564	1	3.1564	2.6564	3.6564	0								0	0	0	4.7053e-147
TGSESSQTGTSTTSSR	16	0	1	Unmodified	_TGSESSQTGTSTTSSR_			0	0	0	sp|P23588|IF4B_HUMAN;sp|P23588-2|IF4B_HUMAN	sp|P23588|IF4B_HUMAN	sp|P23588|IF4B_HUMAN	MSMS	1	16062020_SKO_IP_Cep78	1	exp_1	790.361	2	787.35	1572.69	NaN	NaN	NaN	NaN	NaN	NaN	NaN	NaN	NaN	NaN	4.3796	1	4.3796	3.8796	4.8796	0								0	0	0	1.2065e-108
TGSESSQTGTSTTSSR	16	0	1	Unmodified	_TGSESSQTGTSTTSSR_			0	0	0	sp|P23588|IF4B_HUMAN;sp|P23588-2|IF4B_HUMAN	sp|P23588|IF4B_HUMAN	sp|P23588|IF4B_HUMAN	MSMS	1	16062020_SKO_IP_Cep78	1	exp_1	790.36	2	787.35	1572.69	NaN	NaN	NaN	NaN	NaN	NaN	NaN	NaN	NaN	NaN	5.3855	1	5.3855	4.8855	5.8855	0								0	0	0	2.3776e-127
TGSESSQTGTSTTSSR	16	0	1	Unmodified	_TGSESSQTGTSTTSSR_			0	0	0	sp|P23588|IF4B_HUMAN;sp|P23588-2|IF4B_HUMAN	sp|P23588|IF4B_HUMAN	sp|P23588|IF4B_HUMAN	MULTI-SECPEP		16062020_SKO_IP_Cep78	1	exp_1	791.856	2	787.35	1572.69	32536.3	-0.35233	-0.00027741	1.0627	0.00083671	0.71036	0.0005593	787.352	790.36	792.356	5.7407	0.75935	5.7407	5.0239	5.7833	-8.8818e-16					390	141	10	0	0	0	8.1146e-06
THEDIEAQIR	10	0	1	Unmodified	_THEDIEAQIR_			0	0	0	sp|O75533|SF3B1_HUMAN;sp|O75533-2|SF3B1_HUMAN	sp|O75533|SF3B1_HUMAN	sp|O75533|SF3B1_HUMAN	ISO-MSMS	0	16062020_SKO_IP_Cep78	1	exp_1	606.305	2	606.304	1210.59	NaN	NaN	NaN	-0.4123	-0.00024998	NaN	NaN	NaN	NaN	NaN	16.315	0.18464	16.315	16.23	16.415	0								0	0	0	0.0045242
THEDIEAQIR	10	0	1	Unmodified	_THEDIEAQIR_			0	0	0	sp|O75533|SF3B1_HUMAN;sp|O75533-2|SF3B1_HUMAN	sp|O75533|SF3B1_HUMAN	sp|O75533|SF3B1_HUMAN	ISO-MSMS	2	16062020_SKO_IP_Cep78	1	exp_1	611.309	2	606.304	1210.59	NaN	NaN	NaN	-0.78722	-0.00047729	NaN	NaN	NaN	NaN	NaN	16.321	0.16783	16.321	16.214	16.381	0								0	0	0	0.012892
TIAPQNAPR	9	0	1	Unmodified	_TIAPQNAPR_			0	0	0	sp|Q9NYF8-3|BCLF1_HUMAN;sp|Q9NYF8-2|BCLF1_HUMAN;sp|Q9NYF8|BCLF1_HUMAN;sp|Q9NYF8-4|BCLF1_HUMAN	sp|Q9NYF8-3|BCLF1_HUMAN	sp|Q9NYF8-3|BCLF1_HUMAN	MULTI-MSMS		16062020_SKO_IP_Cep78	1	exp_1	489.791	2	484.27	966.525	40202	0.829	0.00040146	-1.6667	-0.00080714	-0.83771	-0.00040568	484.269	487.278	489.273	10.483	0.60695	10.483	10.105	10.712	0					144	35	10	0	0	0	1.6638e-12
TINVEFAK	8	1	0	Unmodified	_TINVEFAK_			0	0	0	sp|P98175-2|RBM10_HUMAN;sp|P98175|RBM10_HUMAN;sp|P98175-4|RBM10_HUMAN;sp|P98175-3|RBM10_HUMAN	sp|P98175-2|RBM10_HUMAN	sp|P98175-2|RBM10_HUMAN	MULTI-MSMS		16062020_SKO_IP_Cep78	1	exp_1	461.256	2	461.256	920.497	41635.1	0.21355	9.8502e-05	-0.78189	-0.00036065	-0.56834	-0.00026215	461.255	463.269	465.263	28.626	0.27849	28.626	28.51	28.788	3.5527e-15					195	40	8	0	0	0	0.00051035
TLHAQIIEK	9	1	0	Unmodified	_TLHAQIIEK_			0	0	0	sp|Q4VCS5-2|AMOT_HUMAN;sp|Q4VCS5|AMOT_HUMAN	sp|Q4VCS5-2|AMOT_HUMAN	sp|Q4VCS5-2|AMOT_HUMAN	ISO-MSMS	1	16062020_SKO_IP_Cep78	1	exp_1	528.821	2	526.809	1051.6	NaN	NaN	NaN	-0.84276	-0.00044397	NaN	NaN	NaN	NaN	NaN	14.488	0.91959	14.488	14.161	15.081	0								0	0	0	2.2805e-47
TLHAQIIEK	9	1	0	Unmodified	_TLHAQIIEK_			0	0	0	sp|Q4VCS5-2|AMOT_HUMAN;sp|Q4VCS5|AMOT_HUMAN	sp|Q4VCS5-2|AMOT_HUMAN	sp|Q4VCS5-2|AMOT_HUMAN	ISO-MSMS	0	16062020_SKO_IP_Cep78	1	exp_1	526.81	2	526.809	1051.6	NaN	NaN	NaN	-0.18201	-9.5886e-05	NaN	NaN	NaN	NaN	NaN	14.505	0.31856	14.505	14.346	14.664	0								0	0	0	7.0237e-47
TLHAQIIEK	9	1	0	Unmodified	_TLHAQIIEK_			0	0	0	sp|Q4VCS5-2|AMOT_HUMAN;sp|Q4VCS5|AMOT_HUMAN	sp|Q4VCS5-2|AMOT_HUMAN	sp|Q4VCS5-2|AMOT_HUMAN	ISO-MSMS	1	16062020_SKO_IP_Cep78	1	exp_1	528.821	2	526.809	1051.6	NaN	NaN	NaN	-1.0569	-0.0005568	NaN	NaN	NaN	NaN	NaN	15.336	0.71219	15.336	15.081	15.793	1.7764e-15								0	0	0	0.015191
TLHQIFEK	8	1	0	Unmodified	_TLHQIFEK_			0	0	0	sp|P52732|KIF11_HUMAN	sp|P52732|KIF11_HUMAN	sp|P52732|KIF11_HUMAN	MULTI-MSMS		16062020_SKO_IP_Cep78	1	exp_1	508.283	2	508.282	1014.55	40746.2	0.64469	0.00032768	-1.6406	-0.0008339	-0.99594	-0.00050622	508.282	510.293	512.289	17.794	0.28541	17.794	17.68	17.965	0					89	16	9	0	0	0	1.1716e-24
TLQQNAESR	9	0	1	Unmodified	_TLQQNAESR_			0	0	0	sp|O95816-2|BAG2_HUMAN;sp|O95816|BAG2_HUMAN	sp|O95816-2|BAG2_HUMAN	sp|O95816-2|BAG2_HUMAN	ISO-MSMS	0	16062020_SKO_IP_Cep78	1	exp_1	523.765	2	523.765	1045.52	NaN	NaN	NaN	-1.1143	-0.00058363	NaN	NaN	NaN	NaN	NaN	6.2713	0.18426	6.2713	6.1674	6.3516	0								0	0	0	0.016455
TLQQNAESRFN	11	0	1	Unmodified	_TLQQNAESRFN_			0	0	1	sp|O95816-2|BAG2_HUMAN;sp|O95816|BAG2_HUMAN	sp|O95816-2|BAG2_HUMAN	sp|O95816-2|BAG2_HUMAN	ISO-MSMS	2	16062020_SKO_IP_Cep78	1	exp_1	659.327	2	654.321	1306.63	NaN	NaN	NaN	0.0029843	1.9527e-06	NaN	NaN	NaN	NaN	NaN	18.19	0.16883	18.19	18.1	18.268	0								0	0	0	0.0039913
TMVTRFNEAQ	10	0	1	Oxidation (M)	_TM(ox)VTRFNEAQ_	TM(1)VTRFNEAQ	TM(139.38)VTRFNEAQ	0	1	1	sp|P98175-2|RBM10_HUMAN;sp|P98175|RBM10_HUMAN;sp|P98175-4|RBM10_HUMAN;sp|P98175-3|RBM10_HUMAN	sp|P98175-2|RBM10_HUMAN	sp|P98175-2|RBM10_HUMAN	MULTI-MSMS		16062020_SKO_IP_Cep78	1	exp_1	606.787	2	606.788	1211.56	36417.1	0.12383	7.5141e-05	-0.3545	-0.00021511	-0.23067	-0.00013997	606.787	609.799	611.792	14.523	0.15088	14.523	14.429	14.58	-1.7764e-15					39	8	8	0	0	0	1.1855e-49
TNAENEFVTIK	11	1	0	Unmodified	_TNAENEFVTIK_			0	0	0	sp|P04264|K2C1_HUMAN;CON__P04264	sp|P04264|K2C1_HUMAN	sp|P04264|K2C1_HUMAN	MSMS	0	16062020_SKO_IP_Cep78	1	exp_1	633.319	2	633.322	1264.63	NaN	NaN	NaN	NaN	NaN	NaN	NaN	NaN	NaN	NaN	30.451	1	30.451	29.951	30.951	0								0	0	0	0.02174
TNSTFNQVVLK	11	1	0	Unmodified	_TNSTFNQVVLK_			0	0	0	sp|Q07020|RL18_HUMAN;sp|Q07020-2|RL18_HUMAN	sp|Q07020|RL18_HUMAN	sp|Q07020|RL18_HUMAN	ISO-MSMS	2	16062020_SKO_IP_Cep78	1	exp_1	629.847	2	625.841	1249.67	NaN	NaN	NaN	-2.5395	-0.0015893	NaN	NaN	NaN	NaN	NaN	30.056	0.25306	30.056	29.964	30.217	0								0	0	0	0.005853
TPGPGAQSALR	11	0	1	Unmodified	_TPGPGAQSALR_			0	0	0	sp|P62263|RS14_HUMAN	sp|P62263|RS14_HUMAN	sp|P62263|RS14_HUMAN	MSMS	0	16062020_SKO_IP_Cep78	1	exp_1	527.787	2	527.786	1053.56	NaN	NaN	NaN	NaN	NaN	NaN	NaN	NaN	NaN	NaN	14.021	1	14.021	13.521	14.521	0								0	0	0	1.7714e-13
TQNLEIR	7	0	1	Unmodified	_TQNLEIR_			0	0	0	sp|Q7Z353-2|HDX_HUMAN;sp|Q7Z353|HDX_HUMAN	sp|Q7Z353-2|HDX_HUMAN	sp|Q7Z353-2|HDX_HUMAN	ISO-MSMS	0	16062020_SKO_IP_Cep78	1	exp_1	437.747	2	437.243	872.472	NaN	NaN	NaN	2.0199	0.00088317	NaN	NaN	NaN	NaN	NaN	14.647	0.11736	14.647	14.547	14.664	0								0	0	0	0.022808
TSDVGGYYYEK	11	1	0	Unmodified	_TSDVGGYYYEK_			0	0	0	sp|P46821|MAP1B_HUMAN	sp|P46821|MAP1B_HUMAN	sp|P46821|MAP1B_HUMAN	ISO-MSMS	0	16062020_SKO_IP_Cep78	1	exp_1	641.287	2	641.285	1280.56	NaN	NaN	NaN	-0.39236	-0.00025162	NaN	NaN	NaN	NaN	NaN	20.735	0.15109	20.735	20.627	20.778	3.5527e-15								0	0	0	0.0034962
TSDVGGYYYEK	11	1	0	Unmodified	_TSDVGGYYYEK_			0	0	0	sp|P46821|MAP1B_HUMAN	sp|P46821|MAP1B_HUMAN	sp|P46821|MAP1B_HUMAN	ISO-MSMS	2	16062020_SKO_IP_Cep78	1	exp_1	645.295	2	641.285	1280.56	NaN	NaN	NaN	1.5394	0.00098719	NaN	NaN	NaN	NaN	NaN	20.731	0.11752	20.731	20.644	20.762	0								0	0	0	0.004699
TSDVGGYYYEK	11	1	0	Unmodified	_TSDVGGYYYEK_			0	0	0	sp|P46821|MAP1B_HUMAN	sp|P46821|MAP1B_HUMAN	sp|P46821|MAP1B_HUMAN	ISO-MSMS	1	16062020_SKO_IP_Cep78	1	exp_1	643.297	2	641.285	1280.56	NaN	NaN	NaN	0.21551	0.0001382	NaN	NaN	NaN	NaN	NaN	20.716	0.13431	20.716	20.627	20.762	3.5527e-15								0	0	0	0.0066629
TSLGPNGLDK	10	1	0	Unmodified	_TSLGPNGLDK_			0	0	0	sp|P48643|TCPE_HUMAN	sp|P48643|TCPE_HUMAN	sp|P48643|TCPE_HUMAN	ISO-MSMS	0	16062020_SKO_IP_Cep78	1	exp_1	501.268	2	501.267	1000.52	NaN	NaN	NaN	0.99142	0.00049697	NaN	NaN	NaN	NaN	NaN	18.866	0.3372	18.866	18.639	18.976	0								0	0	0	0.026354
TSSEASMDAAYLDK	14	1	0	Oxidation (M)	_TSSEASM(ox)DAAYLDK_	TSSEASM(1)DAAYLDK	TSSEASM(71.89)DAAYLDK	0	1	0	sp|Q5W0B1|RN219_HUMAN	sp|Q5W0B1|RN219_HUMAN	sp|Q5W0B1|RN219_HUMAN	MSMS	0	16062020_SKO_IP_Cep78	1	exp_1	752.827	2	752.827	1503.64	NaN	NaN	NaN	NaN	NaN	NaN	NaN	NaN	NaN	NaN	19.097	1	19.097	18.597	19.597	0								0	0	0	0.015171
TSYAQHQQVR	10	0	1	Unmodified	_TSYAQHQQVR_			0	0	0	sp|P61247|RS3A_HUMAN	sp|P61247|RS3A_HUMAN	sp|P61247|RS3A_HUMAN	MSMS	0	16062020_SKO_IP_Cep78	1	exp_1	609.305	2	609.305	1216.59	NaN	NaN	NaN	NaN	NaN	NaN	NaN	NaN	NaN	NaN	6.0486	1	6.0486	5.5486	6.5486	0								0	0	0	3.9639e-86
TTPSYVAFTDTER	13	0	1	Unmodified	_TTPSYVAFTDTER_			0	0	0	sp|P11142|HSP7C_HUMAN;sp|P11142-2|HSP7C_HUMAN;sp|P54652|HSP72_HUMAN;sp|P0DMV9|HS71B_HUMAN;sp|P0DMV8|HS71A_HUMAN;sp|P0DMV8-2|HS71A_HUMAN;sp|P34931|HS71L_HUMAN;sp|P17066|HSP76_HUMAN;sp|P48741|HSP77_HUMAN	sp|P11142|HSP7C_HUMAN;sp|P0DMV9|HS71B_HUMAN;sp|P17066|HSP76_HUMAN	sp|P0DMV9|HS71B_HUMAN	MULTI-MSMS		16062020_SKO_IP_Cep78	1	exp_1	744.355	2	744.354	1486.69	31950.1	3.008	0.002239	-0.66695	-0.00049645	2.341	0.0017426	744.353	747.363	749.863	37.187	0.47426	37.187	36.948	37.422	0					260	27	14	0	0	0	1.5704e-05
TVGVEPAADGK	11	1	0	Unmodified	_TVGVEPAADGK_			0	0	0	sp|P46779|RL28_HUMAN;sp|P46779-2|RL28_HUMAN;sp|P46779-3|RL28_HUMAN;sp|P46779-4|RL28_HUMAN;sp|P46779-5|RL28_HUMAN	sp|P46779|RL28_HUMAN	sp|P46779|RL28_HUMAN	MULTI-MSMS		16062020_SKO_IP_Cep78	1	exp_1	522.273	2	522.272	1042.53	38476.1	0.94552	0.00049382	-1.1994	-0.00062642	-0.25389	-0.0001326	522.272	524.284	526.279	12.31	0.48818	12.31	12.108	12.597	0					150	28	10	0	0	0	4.556e-14
TVLDLAVVLFETATLR	16	0	1	Unmodified	_TVLDLAVVLFETATLR_			0	0	0	sp|P14625|ENPL_HUMAN	sp|P14625|ENPL_HUMAN	sp|P14625|ENPL_HUMAN	ISO-MSMS	0	16062020_SKO_IP_Cep78	1	exp_1	881.014	2	881.011	1760.01	NaN	NaN	NaN	0.66587	0.00058664	NaN	NaN	NaN	NaN	NaN	116.81	0.067955	116.81	116.76	116.83	0								0	0	0	5.2696e-68
VAFSAIR	7	0	1	Unmodified	_VAFSAIR_			0	0	0	sp|P23435|CBLN1_HUMAN	sp|P23435|CBLN1_HUMAN	sp|P23435|CBLN1_HUMAN	ISO-MSMS	0	16062020_SKO_IP_Cep78	1	exp_1	382.227	2	382.227	762.439	NaN	NaN	NaN	-0.79871	-0.00030529	NaN	NaN	NaN	NaN	NaN	25.996	0.38962	25.996	25.838	26.227	0								0	0	0	0.0080705
VAFSVAR	7	0	1	Unmodified	_VAFSVAR_			0	0	0	sp|P39023|RL3_HUMAN	sp|P39023|RL3_HUMAN	sp|P39023|RL3_HUMAN	MULTI-MSMS		16062020_SKO_IP_Cep78	1	exp_1	378.229	2	375.219	748.423	44800.4	1.6543	0.00062074	-0.048999	-1.8385e-05	1.6053	0.00060235	375.219	378.229	380.223	19.944	0.45458	19.944	19.616	20.071	0					137	26	11	0	0	0	6.5101e-15
VAPAPAVVK	9	1	0	Unmodified	_VAPAPAVVK_			0	0	0	sp|P62424|RL7A_HUMAN	sp|P62424|RL7A_HUMAN	sp|P62424|RL7A_HUMAN	ISO-MSMS	0	16062020_SKO_IP_Cep78	1	exp_1	426.755	2	426.271	850.528	NaN	NaN	NaN	-0.82855	-0.00035319	NaN	NaN	NaN	NaN	NaN	14.918	0.23563	14.918	14.747	14.983	-1.7764e-15								0	0	0	0.011434
VAPAQPSEEGPGR	13	0	1	Unmodified	_VAPAQPSEEGPGR_			0	0	0	sp|P23588|IF4B_HUMAN;sp|P23588-2|IF4B_HUMAN	sp|P23588|IF4B_HUMAN	sp|P23588|IF4B_HUMAN	ISO-MSMS	0	16062020_SKO_IP_Cep78	1	exp_1	647.825	2	647.823	1293.63	NaN	NaN	NaN	1.2378	0.0008019	NaN	NaN	NaN	NaN	NaN	12.31	0.62358	12.31	12.142	12.766	0								0	0	0	0.00011827
VAQLEQVYIR	10	0	1	Unmodified	_VAQLEQVYIR_			0	0	0	sp|P62318-2|SMD3_HUMAN;sp|P62318|SMD3_HUMAN	sp|P62318-2|SMD3_HUMAN	sp|P62318-2|SMD3_HUMAN	MULTI-MSMS		16062020_SKO_IP_Cep78	1	exp_1	615.286	2	609.846	1217.68	36354.3	3.0902	0.0018845	-1.1844	-0.00072232	1.9057	0.0011622	609.845	612.856	614.849	37.063	0.51903	37.063	36.886	37.405	0					129	28	10	0	0	0	3.2781e-64
VATVSLPR	8	0	1	Unmodified	_VATVSLPR_			0	0	0	CON__P00761	CON__P00761	CON__P00761	ISO-MSMS	0	16062020_SKO_IP_Cep78	1	exp_1	421.759	2	421.758	841.502	NaN	NaN	NaN	-0.20751	-8.7518e-05	NaN	NaN	NaN	NaN	NaN	23.09	2.0599	23.09	22.609	24.669	0								0	0	0	4.1025e-06
VAVATPAK	8	1	0	Unmodified	_VAVATPAK_			0	0	0	sp|P19338|NUCL_HUMAN	sp|P19338|NUCL_HUMAN	sp|P19338|NUCL_HUMAN	ISO-MSMS	0	16062020_SKO_IP_Cep78	1	exp_1	379.239	2	378.734	755.454	NaN	NaN	NaN	0.44046	0.00016682	NaN	NaN	NaN	NaN	NaN	9.1534	0.39015	9.1534	8.8431	9.2332	-1.7764e-15								0	0	0	0.015169
VAVVNQIAR	9	0	1	Unmodified	_VAVVNQIAR_			0	0	0	sp|Q01082|SPTB2_HUMAN;sp|Q01082-2|SPTB2_HUMAN;sp|Q01082-3|SPTB2_HUMAN	sp|Q01082|SPTB2_HUMAN	sp|Q01082|SPTB2_HUMAN	ISO-MSMS	0	16062020_SKO_IP_Cep78	1	exp_1	485.296	2	485.296	968.577	NaN	NaN	NaN	-0.88585	-0.0004299	NaN	NaN	NaN	NaN	NaN	20.308	0.20255	20.308	20.239	20.442	0								0	0	0	0.015415
VDEAVAVLQAHQAK	14	1	0	Unmodified	_VDEAVAVLQAHQAK_			0	0	0	sp|P11940-2|PABP1_HUMAN;sp|P11940|PABP1_HUMAN;sp|Q9H361|PABP3_HUMAN	sp|P11940-2|PABP1_HUMAN	sp|P11940-2|PABP1_HUMAN	ISO-MSMS	2	16062020_SKO_IP_Cep78	1	exp_1	743.911	2	739.902	1477.79	NaN	NaN	NaN	-0.6039	-0.00044683	NaN	NaN	NaN	NaN	NaN	27.423	0.2025	27.423	27.293	27.495	0								0	0	0	5.3789e-05
VDNDENEHQLSLR	13	0	1	Unmodified	_VDNDENEHQLSLR_			0	0	0	sp|P06748-3|NPM_HUMAN;sp|P06748-2|NPM_HUMAN;sp|P06748|NPM_HUMAN	sp|P06748-3|NPM_HUMAN	sp|P06748-3|NPM_HUMAN	ISO-MSMS	0	16062020_SKO_IP_Cep78	1	exp_1	784.871	2	784.869	1567.72	NaN	NaN	NaN	-0.19741	-0.00015494	NaN	NaN	NaN	NaN	NaN	17.549	0.16867	17.549	17.461	17.629	0								0	0	0	3.5324e-19
VDPEIQNVK	9	1	0	Unmodified	_VDPEIQNVK_			0	0	0	sp|P35908|K22E_HUMAN;CON__P35908v2;CON__P35908	sp|P35908|K22E_HUMAN	sp|P35908|K22E_HUMAN	ISO-MSMS	0	16062020_SKO_IP_Cep78	1	exp_1	521.286	2	521.282	1040.55	NaN	NaN	NaN	1.4792	0.00077106	NaN	NaN	NaN	NaN	NaN	17.519	0.21977	17.519	17.393	17.613	0								0	0	0	0.015257
VDVADQAQDK	10	1	0	Unmodified	_VDVADQAQDK_			0	0	0	sp|P23588|IF4B_HUMAN;sp|P23588-2|IF4B_HUMAN	sp|P23588|IF4B_HUMAN	sp|P23588|IF4B_HUMAN	MULTI-MSMS		16062020_SKO_IP_Cep78	1	exp_1	548.772	2	544.765	1087.51	38374.8	-0.04801	-2.6154e-05	0.047003	2.5605e-05	-0.0010072	-5.487e-07	544.765	546.777	548.772	10.823	0.57376	10.823	10.475	11.049	-1.7764e-15					232	33	10	0	0	0	2.0661e-77
VEEIMEK	7	1	0	Oxidation (M)	_VEEIM(ox)EK_	VEEIM(1)EK	VEEIM(107.67)EK	0	1	0	sp|O75688|PPM1B_HUMAN;sp|O75688-4|PPM1B_HUMAN;sp|O75688-2|PPM1B_HUMAN;sp|O75688-3|PPM1B_HUMAN	sp|O75688|PPM1B_HUMAN	sp|O75688|PPM1B_HUMAN	MULTI-MSMS		16062020_SKO_IP_Cep78	1	exp_1	447.218	2	447.218	892.421	41727.1	0.015898	7.1099e-06	-0.38337	-0.00017145	-0.36747	-0.00016434	447.218	449.23	451.225	6.9433	0.15082	6.9433	6.853	7.0038	0					44	8	10	0	0	0	3.7027e-10
VEETTEHLVTK	11	1	0	Unmodified	_VEETTEHLVTK_			0	0	0	sp|P52732|KIF11_HUMAN	sp|P52732|KIF11_HUMAN	sp|P52732|KIF11_HUMAN	MULTI-MSMS		16062020_SKO_IP_Cep78	1	exp_1	643.335	2	643.335	1284.66	34570.8	0.897	0.00057707	-0.6479	-0.00041682	0.2491	0.00016026	643.335	645.348	647.342	13.496	0.2686	13.496	13.338	13.607	0					118	15	11	0	0	0	1.4816e-115
VEILANDQGNR	11	0	1	Unmodified	_VEILANDQGNR_			0	0	0	sp|P17066|HSP76_HUMAN;sp|P48741|HSP77_HUMAN	sp|P17066|HSP76_HUMAN	sp|P17066|HSP76_HUMAN	MULTI-MSMS		16062020_SKO_IP_Cep78	1	exp_1	619.82	2	614.818	1227.62	34770.6	0.17616	0.00010831	-0.061011	-3.7511e-05	0.11515	7.0798e-05	614.818	617.828	619.822	18.089	0.4544	18.089	17.848	18.302	3.5527e-15					248	26	15	0	0	0	6.0171e-97
VEQLGAEGNVEESQK	15	1	0	Unmodified	_VEQLGAEGNVEESQK_			0	0	0	sp|Q9Y383-3|LC7L2_HUMAN;sp|Q9Y383-2|LC7L2_HUMAN;sp|Q9Y383|LC7L2_HUMAN;sp|Q96HJ9-2|FMC1_HUMAN	sp|Q9Y383-3|LC7L2_HUMAN	sp|Q9Y383-3|LC7L2_HUMAN	ISO-MSMS	0	16062020_SKO_IP_Cep78	1	exp_1	808.892	2	808.892	1615.77	NaN	NaN	NaN	0.10329	8.3548e-05	NaN	NaN	NaN	NaN	NaN	17.52	0.11766	17.52	17.461	17.578	0								0	0	0	1.2633e-05
VETEIQR	7	0	1	Unmodified	_VETEIQR_			0	0	0	sp|Q4VCS5-2|AMOT_HUMAN;sp|Q4VCS5|AMOT_HUMAN	sp|Q4VCS5-2|AMOT_HUMAN	sp|Q4VCS5-2|AMOT_HUMAN	ISO-MSMS	0	16062020_SKO_IP_Cep78	1	exp_1	437.736	2	437.735	873.456	NaN	NaN	NaN	-0.22142	-9.6923e-05	NaN	NaN	NaN	NaN	NaN	9.4221	0.76875	9.4221	8.8141	9.5828	0								0	0	0	1.3579e-14
VETEIQR	7	0	1	Unmodified	_VETEIQR_			0	0	0	sp|Q4VCS5-2|AMOT_HUMAN;sp|Q4VCS5|AMOT_HUMAN	sp|Q4VCS5-2|AMOT_HUMAN	sp|Q4VCS5-2|AMOT_HUMAN	ISO-MSMS	1	16062020_SKO_IP_Cep78	1	exp_1	441.747	2	437.735	873.456	NaN	NaN	NaN	0.13105	5.7364e-05	NaN	NaN	NaN	NaN	NaN	9.4325	0.86954	9.4325	8.7805	9.6501	0								0	0	0	0.020768
VETFSGVYK	9	1	0	Unmodified	_VETFSGVYK_			0	0	0	sp|P62081|RS7_HUMAN	sp|P62081|RS7_HUMAN	sp|P62081|RS7_HUMAN	MULTI-MSMS		16062020_SKO_IP_Cep78	1	exp_1	519.276	2	515.266	1028.52	37560	1.5121	0.00077912	1.4264	0.00073498	2.9385	0.0015141	515.266	517.28	519.274	25.107	0.40649	25.107	24.874	25.28	3.5527e-15					139	23	10	0	0	0	0.019121
VEYSEEELK	9	1	0	Unmodified	_VEYSEEELK_			0	0	0	sp|P12956-2|XRCC6_HUMAN;sp|P12956|XRCC6_HUMAN	sp|P12956-2|XRCC6_HUMAN	sp|P12956-2|XRCC6_HUMAN	ISO-MSMS	2	16062020_SKO_IP_Cep78	1	exp_1	567.277	2	563.269	1124.52	NaN	NaN	NaN	-0.53195	-0.00029963	NaN	NaN	NaN	NaN	NaN	18.789	0.31996	18.789	18.605	18.925	0								0	0	0	0.027027
VFGNEIK	7	1	0	Unmodified	_VFGNEIK_			0	0	0	sp|P19338|NUCL_HUMAN	sp|P19338|NUCL_HUMAN	sp|P19338|NUCL_HUMAN	MULTI-MSMS		16062020_SKO_IP_Cep78	1	exp_1	403.724	2	403.724	805.433	42657.6	1.7803	0.00071876	0.59305	0.00023943	2.3734	0.00095819	403.724	405.737	407.731	17.267	0.7589	17.267	16.769	17.528	0					169	44	12	0	0	0	2.6004e-10
VFQFLNAK	8	1	0	Unmodified	_VFQFLNAK_			0	0	0	sp|P83731|RL24_HUMAN	sp|P83731|RL24_HUMAN	sp|P83731|RL24_HUMAN	MULTI-MSMS		16062020_SKO_IP_Cep78	1	exp_1	483.776	2	483.774	965.533	41594.5	2.0099	0.00097232	1.7655	0.00085412	3.7754	0.0018264	483.775	485.789	487.781	44.029	1.1965	44.029	43.699	44.896	0					157	70	6	0	0	0	2.3355e-17
VFTSWTGGGAAASR	14	0	1	Unmodified	_VFTSWTGGGAAASR_			0	0	0	CON__P15636	CON__P15636	CON__P15636	ISO-MSMS	0	16062020_SKO_IP_Cep78	1	exp_1	684.841	2	684.339	1366.66	NaN	NaN	NaN	-0.92782	-0.00063494	NaN	NaN	NaN	NaN	NaN	31.115	0.55924	31.115	30.86	31.42	3.5527e-15								0	0	0	5.0754e-05
VFVGRFK	7	1	1	Unmodified	_VFVGRFK_			0	0	1	sp|P11940-2|PABP1_HUMAN;sp|P11940|PABP1_HUMAN;sp|Q13310-2|PABP4_HUMAN;sp|Q13310|PABP4_HUMAN;sp|Q13310-3|PABP4_HUMAN;sp|P0CB38|PAB4L_HUMAN	sp|P11940-2|PABP1_HUMAN;sp|Q13310-2|PABP4_HUMAN	sp|P11940-2|PABP1_HUMAN	MULTI-MSMS		16062020_SKO_IP_Cep78	1	exp_1	426.759	2	426.758	851.502	42291	1.9502	0.00083225	-0.17991	-7.6778e-05	1.7703	0.00075547	426.758	431.781	435.769	17.166	0.33714	17.166	16.988	17.325	0					87	19	8	0	0	0	0.0025591
VGEFSGANK	9	1	0	Unmodified	_VGEFSGANK_			0	0	0	sp|P10599|THIO_HUMAN;sp|P10599-2|THIO_HUMAN	sp|P10599|THIO_HUMAN	sp|P10599|THIO_HUMAN	MSMS	0	16062020_SKO_IP_Cep78	1	exp_1	454.727	2	454.727	907.44	NaN	NaN	NaN	NaN	NaN	NaN	NaN	NaN	NaN	NaN	8.9915	1	8.9915	8.4915	9.4915	0								0	0	0	1.1881e-05
VGLIAAR	7	0	1	Unmodified	_VGLIAAR_			0	0	0	sp|P62917|RL8_HUMAN	sp|P62917|RL8_HUMAN	sp|P62917|RL8_HUMAN	MULTI-MSMS		16062020_SKO_IP_Cep78	1	exp_1	350.23	2	350.229	698.444	45631.9	1.9694	0.00068974	-0.52733	-0.00018469	1.4421	0.00050506	350.229	353.239	355.233	18.813	0.37086	18.813	18.588	18.959	0					142	21	10	0	0	0	6.5509e-55
VGLIAARR	8	0	2	Unmodified	_VGLIAARR_			0	0	1	sp|P62917|RL8_HUMAN	sp|P62917|RL8_HUMAN	sp|P62917|RL8_HUMAN	MULTI-MSMS		16062020_SKO_IP_Cep78	1	exp_1	428.281	2	428.28	854.545	42511.4	1.8366	0.00078656	-0.74592	-0.00031946	1.0906	0.0004671	428.279	434.3	438.288	12.876	0.30374	12.876	12.715	13.019	1.7764e-15					95	17	8	0	0	0	8.2808e-46
VGQASEIAR	9	0	1	Unmodified	_VGQASEIAR_			0	0	0	sp|Q99459|CDC5L_HUMAN	sp|Q99459|CDC5L_HUMAN	sp|Q99459|CDC5L_HUMAN	MULTI-MSMS		16062020_SKO_IP_Cep78	1	exp_1	466.252	2	465.754	929.493	41984.1	0.48833	0.00022744	-0.87396	-0.00040705	-0.38563	-0.00017961	465.754	468.763	470.757	9.3724	0.71843	9.3724	8.7805	9.499	0					126	48	8	0	0	0	1.5768e-05
VGQASEIAR	9	0	1	Unmodified	_VGQASEIAR_			0	0	0	sp|Q99459|CDC5L_HUMAN	sp|Q99459|CDC5L_HUMAN	sp|Q99459|CDC5L_HUMAN	MSMS	2	16062020_SKO_IP_Cep78	1	exp_1	470.756	2	465.754	929.493	NaN	NaN	NaN	NaN	NaN	NaN	NaN	NaN	NaN	NaN	9.1345	1	9.1345	8.6345	9.6345	0								0	0	0	0.010541
VHELNEEIGK	10	1	0	Unmodified	_VHELNEEIGK_			0	0	0	sp|Q9Y383-3|LC7L2_HUMAN;sp|Q9Y383-2|LC7L2_HUMAN;sp|Q9Y383|LC7L2_HUMAN;sp|Q96HJ9-2|FMC1_HUMAN;sp|Q9NQ29-2|LUC7L_HUMAN;sp|Q9NQ29-3|LUC7L_HUMAN;sp|Q9NQ29|LUC7L_HUMAN	sp|Q9Y383-3|LC7L2_HUMAN	sp|Q9Y383-3|LC7L2_HUMAN	MULTI-MSMS		16062020_SKO_IP_Cep78	1	exp_1	588.311	2	584.304	1166.59	36629.7	-0.041873	-2.4467e-05	-0.15205	-8.8843e-05	-0.19392	-0.00011331	584.304	586.317	588.311	14.499	0.15088	14.499	14.413	14.564	-1.7764e-15					38	8	7	0	0	0	3.5155e-110
VHPAVVIR	8	0	1	Unmodified	_VHPAVVIR_			0	0	0	sp|P62829|RL23_HUMAN	sp|P62829|RL23_HUMAN	sp|P62829|RL23_HUMAN	MULTI-MSMS		16062020_SKO_IP_Cep78	1	exp_1	445.783	2	445.782	889.55	40960.3	1.2299	0.00054828	-0.21235	-9.4662e-05	1.0176	0.00045361	445.782	448.791	450.786	13.731	0.33608	13.731	13.556	13.892	0					131	19	12	0	0	0	5.5593e-25
VISELNGK	8	1	0	Unmodified	_VISELNGK_			0	0	0	sp|P05387|RLA2_HUMAN	sp|P05387|RLA2_HUMAN	sp|P05387|RLA2_HUMAN	MULTI-MSMS		16062020_SKO_IP_Cep78	1	exp_1	430.25	2	430.248	858.481	41550.4	0.79743	0.00034309	0.35428	0.00015243	1.1517	0.00049552	430.248	432.26	434.255	13.893	0.40263	13.893	13.742	14.144	0					112	23	10	0	0	0	3.7076e-17
VITALVER	8	0	1	Unmodified	_VITALVER_			0	0	0	sp|P52732|KIF11_HUMAN	sp|P52732|KIF11_HUMAN	sp|P52732|KIF11_HUMAN	MULTI-MSMS		16062020_SKO_IP_Cep78	1	exp_1	450.78	2	450.779	899.544	41166.1	1.5794	0.00071197	0.47256	0.00021302	2.052	0.00092499	450.779	453.789	455.783	27.603	0.33766	27.603	27.428	27.765	0					127	19	9	0	0	0	1.1388e-33
VITIMQNPR	9	0	1	Oxidation (M)	_VITIM(ox)QNPR_	VITIM(1)QNPR	VITIM(75.74)QNPR	0	1	0	sp|P62269|RS18_HUMAN	sp|P62269|RS18_HUMAN	sp|P62269|RS18_HUMAN	ISO-MSMS	0	16062020_SKO_IP_Cep78	1	exp_1	544.301	2	544.3	1086.59	NaN	NaN	NaN	-1.3871	-0.00075501	NaN	NaN	NaN	NaN	NaN	17.52	0.28697	17.52	17.426	17.713	0								0	0	0	0.023767
VLAALQER	8	0	1	Unmodified	_VLAALQER_			0	0	0	sp|Q99733|NP1L4_HUMAN;sp|Q99733-2|NP1L4_HUMAN	sp|Q99733|NP1L4_HUMAN	sp|Q99733|NP1L4_HUMAN	ISO-MSMS	0	16062020_SKO_IP_Cep78	1	exp_1	450.27	2	450.269	898.524	NaN	NaN	NaN	0.064151	2.8885e-05	NaN	NaN	NaN	NaN	NaN	20.096	0.3706	20.096	19.936	20.307	0								0	0	0	6.9398e-16
VLATVTKPVGGDK	13	2	0	Unmodified	_VLATVTKPVGGDK_			0	0	1	sp|Q02878|RL6_HUMAN	sp|Q02878|RL6_HUMAN	sp|Q02878|RL6_HUMAN	MULTI-MSMS		16062020_SKO_IP_Cep78	1	exp_1	650.395	2	642.88	1283.74	34649.8	2.2588	0.0014521	1.4824	0.00095299	3.7412	0.0024051	642.88	647.407	650.895	15.636	0.20241	15.636	15.54	15.742	-1.7764e-15					71	11	11	0	0	0	2.0216e-15
VLDNAIETEK	10	1	0	Unmodified	_VLDNAIETEK_			0	0	0	sp|Q01082|SPTB2_HUMAN;sp|Q01082-2|SPTB2_HUMAN;sp|Q01082-3|SPTB2_HUMAN	sp|Q01082|SPTB2_HUMAN	sp|Q01082|SPTB2_HUMAN	ISO-MSMS	0	16062020_SKO_IP_Cep78	1	exp_1	566.298	2	566.298	1130.58	NaN	NaN	NaN	0.40707	0.00023052	NaN	NaN	NaN	NaN	NaN	19.653	0.21989	19.653	19.548	19.768	0								0	0	0	0.0097284
VLLGETGK	8	1	0	Unmodified	_VLLGETGK_			0	0	0	sp|P62280|RS11_HUMAN	sp|P62280|RS11_HUMAN	sp|P62280|RS11_HUMAN	MULTI-MSMS		16062020_SKO_IP_Cep78	1	exp_1	408.746	2	408.745	815.475	43851.2	0.34819	0.00014232	0.67606	0.00027634	1.0242	0.00041866	408.745	410.758	412.752	16.135	0.31965	16.135	15.961	16.281	0					122	18	11	0	0	0	2.472e-16
VLNTNIDGR	9	0	1	Unmodified	_VLNTNIDGR_			0	0	0	sp|P62269|RS18_HUMAN	sp|P62269|RS18_HUMAN	sp|P62269|RS18_HUMAN	MSMS	0	16062020_SKO_IP_Cep78	1	exp_1	501.273	2	501.272	1000.53	NaN	NaN	NaN	NaN	NaN	NaN	NaN	NaN	NaN	NaN	17.555	1	17.555	17.055	18.055	0								0	0	0	7.6102e-42
VLTVINQTQK	10	1	0	Unmodified	_VLTVINQTQK_			0	0	0	sp|P42766|RL35_HUMAN	sp|P42766|RL35_HUMAN	sp|P42766|RL35_HUMAN	ISO-MSMS	2	16062020_SKO_IP_Cep78	1	exp_1	576.349	2	572.34	1142.67	NaN	NaN	NaN	2.5202	0.0014424	NaN	NaN	NaN	NaN	NaN	20.715	0.30226	20.715	20.543	20.846	0								0	0	0	8.1215e-21
VLTVINQTQK	10	1	0	Unmodified	_VLTVINQTQK_			0	0	0	sp|P42766|RL35_HUMAN	sp|P42766|RL35_HUMAN	sp|P42766|RL35_HUMAN	ISO-MSMS	0	16062020_SKO_IP_Cep78	1	exp_1	572.342	2	572.34	1142.67	NaN	NaN	NaN	0.41881	0.0002397	NaN	NaN	NaN	NaN	NaN	20.739	0.28544	20.739	20.56	20.846	0								0	0	0	0.013745
VLVNDAQK	8	1	0	Unmodified	_VLVNDAQK_			0	0	0	sp|Q13263-2|TIF1B_HUMAN;sp|Q13263|TIF1B_HUMAN	sp|Q13263-2|TIF1B_HUMAN	sp|Q13263-2|TIF1B_HUMAN	MSMS	0	16062020_SKO_IP_Cep78	1	exp_1	443.752	2	443.753	885.492	NaN	NaN	NaN	NaN	NaN	NaN	NaN	NaN	NaN	NaN	9.2306	1	9.2306	8.7306	9.7306	0								0	0	0	0.0035519
VLVNSASAQK	10	1	0	Unmodified	_VLVNSASAQK_			0	0	0	sp|O75122|CLAP2_HUMAN;sp|O75122-3|CLAP2_HUMAN	sp|O75122|CLAP2_HUMAN	sp|O75122|CLAP2_HUMAN	ISO-MSMS	0	16062020_SKO_IP_Cep78	1	exp_1	509.291	2	508.79	1015.57	NaN	NaN	NaN	1.3762	0.00070021	NaN	NaN	NaN	NaN	NaN	9.4672	0.13255	9.4672	9.3832	9.5157	1.7764e-15								0	0	0	4.1761e-12
VLVNSASAQK	10	1	0	Unmodified	_VLVNSASAQK_			0	0	0	sp|O75122|CLAP2_HUMAN;sp|O75122-3|CLAP2_HUMAN	sp|O75122|CLAP2_HUMAN	sp|O75122|CLAP2_HUMAN	MSMS	2	16062020_SKO_IP_Cep78	1	exp_1	512.799	2	508.79	1015.57	NaN	NaN	NaN	NaN	NaN	NaN	NaN	NaN	NaN	NaN	9.4761	1	9.4761	8.9761	9.9761	0								0	0	0	1.158e-06
VLVVSAK	7	1	0	Unmodified	_VLVVSAK_			0	0	0	sp|Q9H3K6-2|BOLA2_HUMAN;sp|Q9H3K6|BOLA2_HUMAN	sp|Q9H3K6-2|BOLA2_HUMAN	sp|Q9H3K6-2|BOLA2_HUMAN	MULTI-MSMS		16062020_SKO_IP_Cep78	1	exp_1	358.239	2	358.239	714.464	45838.9	0.1366	4.8934e-05	0.13395	4.7986e-05	0.27055	9.692e-05	358.239	360.252	362.247	14.535	0.30069	14.535	14.413	14.713	0					117	17	11	0	0	0	9.9701e-15
VMEEEGLKDEEK	12	2	0	Oxidation (M)	_VM(ox)EEEGLKDEEK_	VM(1)EEEGLKDEEK	VM(115.04)EEEGLKDEEK	0	1	1	sp|Q15208|STK38_HUMAN	sp|Q15208|STK38_HUMAN	sp|Q15208|STK38_HUMAN	ISO-MSMS	0	16062020_SKO_IP_Cep78	1	exp_1	726.831	2	726.332	1450.65	NaN	NaN	NaN	0.072147	5.2403e-05	NaN	NaN	NaN	NaN	NaN	9.7152	0.28672	9.7152	9.5157	9.8025	0								0	0	0	0.0019103
VMPAPPPK	8	1	0	Oxidation (M)	_VM(ox)PAPPPK_	VM(1)PAPPPK	VM(60.79)PAPPPK	0	1	0	sp|P23588|IF4B_HUMAN;sp|P23588-2|IF4B_HUMAN	sp|P23588|IF4B_HUMAN	sp|P23588|IF4B_HUMAN	MULTI-SECPEP		16062020_SKO_IP_Cep78	1	exp_1	426.54	2	426.736	851.458	42114.3	0.17927	7.6503e-05	-0.2644	-0.00011283	-0.085129	-3.6328e-05	426.736	428.749	430.743	6.8937	0.42672	6.8937	6.6874	7.1141	0					140	33	9	0	0	0	0.023473
VNGSLAVSR	9	0	1	Unmodified	_VNGSLAVSR_			0	0	0	sp|O75688|PPM1B_HUMAN;sp|O75688-4|PPM1B_HUMAN;sp|O75688-2|PPM1B_HUMAN;sp|O75688-5|PPM1B_HUMAN;sp|P35813-2|PPM1A_HUMAN;sp|P35813|PPM1A_HUMAN;sp|P35813-3|PPM1A_HUMAN	sp|O75688|PPM1B_HUMAN	sp|O75688|PPM1B_HUMAN	ISO-MSMS	1	16062020_SKO_IP_Cep78	1	exp_1	454.77	2	451.756	901.498	NaN	NaN	NaN	3.3616	0.0015186	NaN	NaN	NaN	NaN	NaN	13.205	0.3196	13.205	13.019	13.338	0								0	0	0	0.0098754
VNSLGETAER	10	0	1	Unmodified	_VNSLGETAER_			0	0	0	sp|Q13813-3|SPTN1_HUMAN;sp|Q13813|SPTN1_HUMAN;sp|Q13813-2|SPTN1_HUMAN	sp|Q13813-3|SPTN1_HUMAN	sp|Q13813-3|SPTN1_HUMAN	ISO-MSMS	0	16062020_SKO_IP_Cep78	1	exp_1	538.806	2	538.273	1074.53	NaN	NaN	NaN	-0.13889	-7.4761e-05	NaN	NaN	NaN	NaN	NaN	11.215	0.23592	11.215	11.066	11.302	0								0	0	0	0.022324
VPLSAYER	8	0	1	Unmodified	_VPLSAYER_			0	0	0	sp|Q9UQ35|SRRM2_HUMAN	sp|Q9UQ35|SRRM2_HUMAN	sp|Q9UQ35|SRRM2_HUMAN	ISO-MSMS	0	16062020_SKO_IP_Cep78	1	exp_1	468.258	2	467.753	933.492	NaN	NaN	NaN	-0.4128	-0.00019309	NaN	NaN	NaN	NaN	NaN	19.266	0.37043	19.266	19.11	19.481	0								0	0	0	0.02597
VQALEEANNDLENK	14	1	0	Unmodified	_VQALEEANNDLENK_			0	0	0	sp|P35527|K1C9_HUMAN;CON__P35527	sp|P35527|K1C9_HUMAN	sp|P35527|K1C9_HUMAN	ISO-MSMS	0	16062020_SKO_IP_Cep78	1	exp_1	794.389	2	793.886	1585.76	NaN	NaN	NaN	-0.34341	-0.00027263	NaN	NaN	NaN	NaN	NaN	26.786	0.33802	26.786	26.6	26.938	0								0	0	0	4.4034e-05
VQIQESVR	8	0	1	Unmodified	_VQIQESVR_			0	0	0	sp|O60256-3|KPRB_HUMAN;sp|O60256|KPRB_HUMAN	sp|O60256-3|KPRB_HUMAN	sp|O60256-3|KPRB_HUMAN	ISO-MSMS	0	16062020_SKO_IP_Cep78	1	exp_1	479.772	2	479.769	957.524	NaN	NaN	NaN	1.4234	0.00068291	NaN	NaN	NaN	NaN	NaN	15.565	0.30358	15.565	15.472	15.776	1.7764e-15								0	0	0	0.010252
VQVEYKGETK	10	2	0	Unmodified	_VQVEYKGETK_			0	0	1	sp|P11142|HSP7C_HUMAN;sp|P11142-2|HSP7C_HUMAN;sp|P54652|HSP72_HUMAN	sp|P11142|HSP7C_HUMAN	sp|P11142|HSP7C_HUMAN	ISO-MSMS	2	16062020_SKO_IP_Cep78	1	exp_1	598.828	2	590.814	1179.61	NaN	NaN	NaN	0.7824	0.00046225	NaN	NaN	NaN	NaN	NaN	9.0171	0.19673	9.0171	8.8878	9.0845	0								0	0	0	0.016787
VQVEYKGETK	10	2	0	Unmodified	_VQVEYKGETK_			0	0	1	sp|P11142|HSP7C_HUMAN;sp|P11142-2|HSP7C_HUMAN;sp|P54652|HSP72_HUMAN	sp|P11142|HSP7C_HUMAN	sp|P11142|HSP7C_HUMAN	MSMS	1	16062020_SKO_IP_Cep78	1	exp_1	594.837	2	590.814	1179.61	NaN	NaN	NaN	NaN	NaN	NaN	NaN	NaN	NaN	NaN	8.8945	1	8.8945	8.3945	9.3945	0								0	0	0	1.1795e-06
VQVSYKGETK	10	2	0	Unmodified	_VQVSYKGETK_			0	0	1	sp|P0DMV9|HS71B_HUMAN;sp|P0DMV8|HS71A_HUMAN	sp|P0DMV9|HS71B_HUMAN	sp|P0DMV9|HS71B_HUMAN	ISO-MSMS	0	16062020_SKO_IP_Cep78	1	exp_1	569.806	2	569.809	1137.6	NaN	NaN	NaN	0.37936	0.00021616	NaN	NaN	NaN	NaN	NaN	7.832	0.25664	7.832	7.7417	7.9983	8.8818e-16								0	0	0	0.0083725
VQVSYKGETK	10	2	0	Unmodified	_VQVSYKGETK_			0	0	1	sp|P0DMV9|HS71B_HUMAN;sp|P0DMV8|HS71A_HUMAN	sp|P0DMV9|HS71B_HUMAN	sp|P0DMV9|HS71B_HUMAN	ISO-MSMS	2	16062020_SKO_IP_Cep78	1	exp_1	577.823	2	569.809	1137.6	NaN	NaN	NaN	0.081162	4.6247e-05	NaN	NaN	NaN	NaN	NaN	7.8292	0.20568	7.8292	7.737	7.9427	-8.8818e-16								0	0	0	4.6864e-19
VQVYQEPNRETR	12	0	2	Unmodified	_VQVYQEPNRETR_			0	0	1	sp|O60256-3|KPRB_HUMAN;sp|O60256|KPRB_HUMAN	sp|O60256-3|KPRB_HUMAN	sp|O60256-3|KPRB_HUMAN	ISO-MSMS	0	16062020_SKO_IP_Cep78	1	exp_1	759.89	2	759.887	1517.76	NaN	NaN	NaN	1.6673	0.001267	NaN	NaN	NaN	NaN	NaN	13.067	0.13479	13.067	12.985	13.12	0								0	0	0	0.0011408
VRFLEQQNK	9	1	1	Unmodified	_VRFLEQQNK_			0	0	1	CON__Q5XQN5;CON__Q922U2;sp|P05787|K2C8_HUMAN;CON__P05787;sp|P05787-2|K2C8_HUMAN;CON__Q8VED5;sp|Q5XKE5|K2C79_HUMAN;CON__Q5XKE5;CON__H-INV:HIT000292931;CON__P50446;sp|O95678|K2C75_HUMAN;CON__Q8BGZ7;CON__O95678;sp|P12035|K2C3_HUMAN;CON__P12035;CON__Q01546;sp|Q8N1N4-2|K2C78_HUMAN;sp|P14136-3|GFAP_HUMAN;sp|P14136|GFAP_HUMAN;sp|P14136-2|GFAP_HUMAN;CON__Q9DCV7;sp|P08670|VIME_HUMAN;sp|P08729|K2C7_HUMAN;C…	CON__Q5XQN5;sp|P13647|K2C5_HUMAN	CON__Q5XQN5	ISO-MSMS	0	16062020_SKO_IP_Cep78	1	exp_1	581.323	2	581.322	1160.63	NaN	NaN	NaN	0.2321	0.00013493	NaN	NaN	NaN	NaN	NaN	14.538	0.11734	14.538	14.463	14.58	1.7764e-15								0	0	0	6.7454e-107
VRLLLSK	7	1	1	Unmodified	_VRLLLSK_			0	0	1	sp|P62753|RS6_HUMAN	sp|P62753|RS6_HUMAN	sp|P62753|RS6_HUMAN	MULTI-MSMS		16062020_SKO_IP_Cep78	1	exp_1	423.798	2	414.787	827.559	43843.6	0.97153	0.00040298	0.12074	5.0081e-05	1.0923	0.00045306	414.787	419.809	423.798	19.583	0.32102	19.583	19.43	19.751	3.5527e-15					94	18	8	0	0	0	5.3359e-06
VRQQAADLISR	11	0	2	Unmodified	_VRQQAADLISR_			0	0	1	sp|O75533|SF3B1_HUMAN	sp|O75533|SF3B1_HUMAN	sp|O75533|SF3B1_HUMAN	MULTI-MSMS		16062020_SKO_IP_Cep78	1	exp_1	628.858	2	628.857	1255.7	35125.2	3.2254	0.0020283	-1.6873	-0.0010611	1.538	0.00096721	628.856	634.878	638.865	15.896	0.20194	15.896	15.793	15.995	0					63	11	8	0	0	0	1.7717e-67
VTERHMQITQEEK	13	1	1	Oxidation (M)	_VTERHM(ox)QITQEEK_	VTERHM(1)QITQEEK	VTERHM(46.46)QITQEEK	0	1	1	sp|Q8WZ42-11|TITIN_HUMAN;sp|Q8WZ42-4|TITIN_HUMAN;sp|Q8WZ42-7|TITIN_HUMAN;sp|Q8WZ42-2|TITIN_HUMAN;sp|Q8WZ42|TITIN_HUMAN;sp|Q8WZ42-8|TITIN_HUMAN;sp|Q8WZ42-13|TITIN_HUMAN;sp|Q8WZ42-12|TITIN_HUMAN	sp|Q8WZ42-11|TITIN_HUMAN	sp|Q8WZ42-11|TITIN_HUMAN	MSMS	0	16062020_SKO_IP_Cep78	1	exp_1	822.906	2	822.904	1643.79	NaN	NaN	NaN	NaN	NaN	NaN	NaN	NaN	NaN	NaN	57.343	1	57.343	56.843	57.843	0								0	0	0	0.027772
VTMQNLNDR	9	0	1	Oxidation (M)	_VTM(ox)QNLNDR_	VTM(1)QNLNDR	VTM(101.43)QNLNDR	0	1	0	sp|P02533|K1C14_HUMAN;CON__P02533;CON__A2A4G1;CON__Q9Z2K1;CON__Q3ZAW8;sp|Q7Z3Z0|K1C25_HUMAN;CON__Q7Z3Z0;sp|Q7Z3Y8|K1C27_HUMAN;CON__Q7Z3Y8;sp|Q7Z3Y7|K1C28_HUMAN;CON__Q148H6;sp|Q7Z3Y9|K1C26_HUMAN;CON__Q7Z3Y9;CON__Q7Z3Y7;sp|P08779|K1C16_HUMAN;CON__P08779;sp|P13645|K1C10_HUMAN;CON__P13645;CON__P02535-1	sp|P02533|K1C14_HUMAN;sp|P08779|K1C16_HUMAN;sp|P13645|K1C10_HUMAN	sp|P13645|K1C10_HUMAN	ISO-MSMS	0	16062020_SKO_IP_Cep78	1	exp_1	553.767	2	553.767	1105.52	NaN	NaN	NaN	0.12005	6.648e-05	NaN	NaN	NaN	NaN	NaN	6.8949	0.1173	6.8949	6.8362	6.9535	0								0	0	0	0.0059909
VVEIVDEK	8	1	0	Unmodified	_VVEIVDEK_			0	0	0	sp|Q6PKG0-3|LARP1_HUMAN;sp|Q6PKG0|LARP1_HUMAN	sp|Q6PKG0-3|LARP1_HUMAN	sp|Q6PKG0-3|LARP1_HUMAN	ISO-MSMS	2	16062020_SKO_IP_Cep78	1	exp_1	469.768	2	465.761	929.507	NaN	NaN	NaN	-1.0404	-0.00048458	NaN	NaN	NaN	NaN	NaN	18.846	0.20245	18.846	18.757	18.959	0								0	0	0	0.023951
VVNPLFEK	8	1	0	Unmodified	_VVNPLFEK_			0	0	0	sp|P62424|RL7A_HUMAN	sp|P62424|RL7A_HUMAN	sp|P62424|RL7A_HUMAN	ISO-MSMS	0	16062020_SKO_IP_Cep78	1	exp_1	473.275	2	473.274	944.533	NaN	NaN	NaN	0.3773	0.00017856	NaN	NaN	NaN	NaN	NaN	33.559	1.0362	33.559	33.313	34.35	0								0	0	0	0.010729
VVQVYRK	7	1	1	Unmodified	_VVQVYRK_			0	0	1	sp|P61254|RL26_HUMAN;sp|Q9UNX3|RL26L_HUMAN;sp|Q2PPJ7-3|RGPA2_HUMAN;sp|Q2PPJ7-2|RGPA2_HUMAN;sp|Q2PPJ7|RGPA2_HUMAN	sp|P61254|RL26_HUMAN	sp|P61254|RL26_HUMAN	MULTI-MSMS		16062020_SKO_IP_Cep78	1	exp_1	446.275	2	446.274	890.534	41575.9	0.64702	0.00028875	0.82164	0.00036668	1.4687	0.00065542	446.275	451.297	455.286	6.3768	0.10051	6.3768	6.3181	6.4186	0					32	5	8	0	0	0	2.8418e-32
VYVGNLGNNGNK	12	1	0	Unmodified	_VYVGNLGNNGNK_			0	0	0	sp|P84103-2|SRSF3_HUMAN;sp|P84103|SRSF3_HUMAN	sp|P84103-2|SRSF3_HUMAN	sp|P84103-2|SRSF3_HUMAN	ISO-MSMS	0	16062020_SKO_IP_Cep78	1	exp_1	624.82	2	624.82	1247.63	NaN	NaN	NaN	-1.0712	-0.00066928	NaN	NaN	NaN	NaN	NaN	17.739	0.18466	17.739	17.663	17.848	0								0	0	0	1.7779e-23
VYVGNLGTGAGK	12	1	0	Unmodified	_VYVGNLGTGAGK_			0	0	0	sp|Q16629-3|SRSF7_HUMAN;sp|Q16629-2|SRSF7_HUMAN;sp|Q16629-4|SRSF7_HUMAN;sp|Q16629|SRSF7_HUMAN	sp|Q16629-3|SRSF7_HUMAN	sp|Q16629-3|SRSF7_HUMAN	ISO-MSMS	0	16062020_SKO_IP_Cep78	1	exp_1	568.78	2	568.309	1134.6	NaN	NaN	NaN	-0.78499	-0.00044611	NaN	NaN	NaN	NaN	NaN	21.57	0.27171	21.57	21.44	21.712	3.5527e-15								0	0	0	0.0011091
YAHVVLRK	8	1	1	Unmodified	_YAHVVLRK_			0	0	1	sp|P62269|RS18_HUMAN	sp|P62269|RS18_HUMAN	sp|P62269|RS18_HUMAN	MULTI-MSMS		16062020_SKO_IP_Cep78	1	exp_1	493.301	2	493.301	984.587	40112.8	0.2927	0.00014439	0.38903	0.00019191	0.68173	0.0003363	493.301	498.325	502.312	6.8614	0.10061	6.8614	6.8027	6.9033	0					33	5	9	0	0	0	1.4527e-87
YALTGDEVK	9	1	0	Unmodified	_YALTGDEVK_			0	0	0	sp|P62701|RS4X_HUMAN;sp|Q8TD47|RS4Y2_HUMAN;sp|P22090|RS4Y1_HUMAN	sp|P62701|RS4X_HUMAN	sp|P62701|RS4X_HUMAN	MULTI-MSMS		16062020_SKO_IP_Cep78	1	exp_1	502.263	2	498.256	994.497	39079.4	1.6198	0.0008071	0.51239	0.0002553	2.1322	0.0010624	498.256	500.269	502.263	19.861	0.60721	19.861	19.413	20.02	0					199	35	11	0	0	0	0.0071131
YDGIILPGK	9	1	0	Unmodified	_YDGIILPGK_			0	0	0	sp|P62913-2|RL11_HUMAN;sp|P62913|RL11_HUMAN	sp|P62913-2|RL11_HUMAN	sp|P62913-2|RL11_HUMAN	ISO-MSMS	0	16062020_SKO_IP_Cep78	1	exp_1	488.28	2	488.279	974.544	NaN	NaN	NaN	0.48373	0.00023619	NaN	NaN	NaN	NaN	NaN	39.216	0.74806	39.216	38.72	39.468	0								0	0	0	0.021532
YEAIVEENK	9	1	0	Unmodified	_YEAIVEENK_			0	0	0	sp|Q99417|MYCBP_HUMAN	sp|Q99417|MYCBP_HUMAN	sp|Q99417|MYCBP_HUMAN	ISO-MSMS	2	16062020_SKO_IP_Cep78	1	exp_1	551.779	2	547.772	1093.53	NaN	NaN	NaN	-1.0305	-0.0005645	NaN	NaN	NaN	NaN	NaN	16.946	0.16846	16.946	16.871	17.039	0								0	0	0	0.018877
YEAIVEENKK	10	2	0	Unmodified	_YEAIVEENKK_			0	0	1	sp|Q99417|MYCBP_HUMAN	sp|Q99417|MYCBP_HUMAN	sp|Q99417|MYCBP_HUMAN	ISO-MSMS	0	16062020_SKO_IP_Cep78	1	exp_1	611.819	2	611.819	1221.62	NaN	NaN	NaN	1.1259	0.00068884	NaN	NaN	NaN	NaN	NaN	11.915	0.084272	11.915	11.856	11.94	0								0	0	0	0.0096196
YEDEINK	7	1	0	Unmodified	_YEDEINK_			0	0	0	CON__Q5XQN5;CON__Q922U2;sp|P05787|K2C8_HUMAN;CON__P05787;sp|P05787-2|K2C8_HUMAN;CON__Q8VED5;sp|Q5XKE5|K2C79_HUMAN;CON__Q5XKE5;CON__H-INV:HIT000016045;CON__H-INV:HIT000292931;CON__P50446;CON__Q9H552;sp|O95678|K2C75_HUMAN;CON__Q8BGZ7;CON__O95678;sp|P12035|K2C3_HUMAN;CON__P12035;CON__Q01546;sp|P04264|K2C1_HUMAN;CON__P04264;CON__Q6IFZ6;sp|Q7Z794|K2C1B_HUMAN;CON__Q7Z794;sp|P13647|K2C5_HUMAN;CON__P1364…	CON__Q5XQN5;sp|P04264|K2C1_HUMAN;sp|P13647|K2C5_HUMAN;sp|P35908|K22E_HUMAN	sp|P04264|K2C1_HUMAN	ISO-MSMS	0	16062020_SKO_IP_Cep78	1	exp_1	455.711	2	455.711	909.408	NaN	NaN	NaN	1.1933	0.0005438	NaN	NaN	NaN	NaN	NaN	8.8919	0.81927	8.8919	8.7636	9.5828	1.7764e-15								0	0	0	0.024085
YEELQITAGR	10	0	1	Unmodified	_YEELQITAGR_			0	0	0	sp|P04264|K2C1_HUMAN;CON__P04264	sp|P04264|K2C1_HUMAN	sp|P04264|K2C1_HUMAN	ISO-MSMS	0	16062020_SKO_IP_Cep78	1	exp_1	590.304	2	590.304	1178.59	NaN	NaN	NaN	2.6554	0.0015675	NaN	NaN	NaN	NaN	NaN	29.895	0.47282	29.895	29.711	30.183	0								0	0	0	0.012718
YEELQQTAGR	10	0	1	Unmodified	_YEELQQTAGR_			0	0	0	CON__Q5XQN5;CON__Q922U2;sp|P13647|K2C5_HUMAN;CON__P13647	CON__Q5XQN5;sp|P13647|K2C5_HUMAN	CON__Q5XQN5	MSMS	0	16062020_SKO_IP_Cep78	1	exp_1	597.791	2	597.791	1193.57	NaN	NaN	NaN	NaN	NaN	NaN	NaN	NaN	NaN	NaN	14.641	1	14.641	14.141	15.141	0								0	0	0	1.1331e-44
YEITEQRK	8	1	1	Unmodified	_YEITEQRK_			0	0	1	sp|Q02878|RL6_HUMAN	sp|Q02878|RL6_HUMAN	sp|Q02878|RL6_HUMAN	ISO-MSMS	0	16062020_SKO_IP_Cep78	1	exp_1	533.779	2	533.78	1065.55	NaN	NaN	NaN	-0.58679	-0.00031322	NaN	NaN	NaN	NaN	NaN	7.8303	0.20184	7.8303	7.7677	7.9696	8.8818e-16								0	0	0	0.0028032
YELGRPAANTK	11	1	1	Unmodified	_YELGRPAANTK_			0	0	1	sp|P62241|RS8_HUMAN	sp|P62241|RS8_HUMAN	sp|P62241|RS8_HUMAN	ISO-MSMS	0	16062020_SKO_IP_Cep78	1	exp_1	610.326	2	610.325	1218.64	NaN	NaN	NaN	-0.59419	-0.00036265	NaN	NaN	NaN	NaN	NaN	13.305	0.30242	13.305	13.12	13.422	0								0	0	0	0.0099073
YELGRPAANTK	11	1	1	Unmodified	_YELGRPAANTK_			0	0	1	sp|P62241|RS8_HUMAN	sp|P62241|RS8_HUMAN	sp|P62241|RS8_HUMAN	ISO-MSMS	2	16062020_SKO_IP_Cep78	1	exp_1	619.838	2	610.325	1218.64	NaN	NaN	NaN	-0.92183	-0.00056262	NaN	NaN	NaN	NaN	NaN	13.305	0.25211	13.305	13.17	13.422	0								0	0	0	4.3412e-05
YELISETGGSHDK	13	1	0	Unmodified	_YELISETGGSHDK_			0	0	0	sp|Q12906-5|ILF3_HUMAN;sp|Q12906-4|ILF3_HUMAN;sp|Q12906-2|ILF3_HUMAN;sp|Q12906-6|ILF3_HUMAN;sp|Q12906-3|ILF3_HUMAN;sp|Q12906|ILF3_HUMAN;sp|Q12906-7|ILF3_HUMAN;sp|Q96SI9-2|STRBP_HUMAN;sp|Q96SI9|STRBP_HUMAN	sp|Q12906-5|ILF3_HUMAN	sp|Q12906-5|ILF3_HUMAN	ISO-MSMS	2	16062020_SKO_IP_Cep78	1	exp_1	722.344	2	718.339	1434.66	NaN	NaN	NaN	0.24385	0.00017516	NaN	NaN	NaN	NaN	NaN	18.664	0.28605	18.664	18.521	18.807	0								0	0	0	0.0010347
YENEVALR	8	0	1	Unmodified	_YENEVALR_			0	0	0	sp|P13645|K1C10_HUMAN;CON__P13645	sp|P13645|K1C10_HUMAN	sp|P13645|K1C10_HUMAN	ISO-MSMS	0	16062020_SKO_IP_Cep78	1	exp_1	497.254	2	497.254	992.493	NaN	NaN	NaN	0.28396	0.0001412	NaN	NaN	NaN	NaN	NaN	17.928	0.28545	17.928	17.797	18.083	0								0	0	0	0.018588
YESSLYSQEYSK	12	1	0	Unmodified	_YESSLYSQEYSK_			0	0	0	sp|P46821|MAP1B_HUMAN	sp|P46821|MAP1B_HUMAN	sp|P46821|MAP1B_HUMAN	ISO-MSMS	0	16062020_SKO_IP_Cep78	1	exp_1	742.331	2	742.333	1482.65	NaN	NaN	NaN	-0.37967	-0.00028184	NaN	NaN	NaN	NaN	NaN	22.733	0.21902	22.733	22.643	22.862	0								0	0	0	1.299e-05
YGASLRK	7	1	1	Unmodified	_YGASLRK_			0	0	1	sp|P61513|RL37A_HUMAN	sp|P61513|RL37A_HUMAN	sp|P61513|RL37A_HUMAN	MULTI-MSMS		16062020_SKO_IP_Cep78	1	exp_1	397.73	2	397.73	793.445	44512.9	0.48197	0.00019169	0.40104	0.0001595	0.88301	0.0003512	397.73	402.752	406.741	6.159	0.10052	6.159	6.1003	6.2009	0					26	5	7	0	0	0	7.7908e-23
YHPGYFGK	8	1	0	Unmodified	_YHPGYFGK_			0	0	0	sp|P46776|RL27A_HUMAN	sp|P46776|RL27A_HUMAN	sp|P46776|RL27A_HUMAN	MULTI-MSMS		16062020_SKO_IP_Cep78	1	exp_1	484.736	2	484.735	967.455	39253.5	0.40765	0.0001976	1.2123	0.00058765	1.62	0.00078525	484.735	486.748	488.743	14.488	0.31853	14.488	14.262	14.58	0					96	18	10	0	0	0	3.5628e-07
YIDQEELNK	9	1	0	Unmodified	_YIDQEELNK_			0	0	0	sp|P08238|HS90B_HUMAN;sp|Q14568|HS902_HUMAN;sp|Q58FF8|H90B2_HUMAN;sp|P07900|HS90A_HUMAN;sp|P07900-2|HS90A_HUMAN	sp|P08238|HS90B_HUMAN;sp|P07900|HS90A_HUMAN	sp|P07900|HS90A_HUMAN	ISO-MSMS	2	16062020_SKO_IP_Cep78	1	exp_1	580.29	2	576.283	1150.55	NaN	NaN	NaN	1.2374	0.00071311	NaN	NaN	NaN	NaN	NaN	17.688	0.18537	17.688	17.578	17.764	0								0	0	0	0.016547
YIDQEELNK	9	1	0	Unmodified	_YIDQEELNK_			0	0	0	sp|P08238|HS90B_HUMAN;sp|Q14568|HS902_HUMAN;sp|Q58FF8|H90B2_HUMAN;sp|P07900|HS90A_HUMAN;sp|P07900-2|HS90A_HUMAN	sp|P08238|HS90B_HUMAN;sp|P07900|HS90A_HUMAN	sp|P07900|HS90A_HUMAN	ISO-MSMS	0	16062020_SKO_IP_Cep78	1	exp_1	576.284	2	576.283	1150.55	NaN	NaN	NaN	1.5285	0.00088085	NaN	NaN	NaN	NaN	NaN	17.703	0.21892	17.703	17.562	17.78	0								0	0	0	7.203e-18
YKAEDEVQR	9	1	1	Unmodified	_YKAEDEVQR_			0	0	1	sp|P0DMV9|HS71B_HUMAN;sp|P0DMV8|HS71A_HUMAN;sp|P0DMV8-2|HS71A_HUMAN;sp|P34931|HS71L_HUMAN	sp|P0DMV9|HS71B_HUMAN	sp|P0DMV9|HS71B_HUMAN	MULTI-MSMS		16062020_SKO_IP_Cep78	1	exp_1	569.283	2	569.28	1136.55	38061.9	-0.38307	-0.00021807	0.99864	0.0005685	0.61557	0.00035043	569.282	574.304	578.292	6.9299	0.17517	6.9299	6.853	7.0281	0					38	10	6	0	0	0	0.0017496
YKAEDEVQR	9	1	1	Unmodified	_YKAEDEVQR_			0	0	1	sp|P0DMV9|HS71B_HUMAN;sp|P0DMV8|HS71A_HUMAN;sp|P0DMV8-2|HS71A_HUMAN;sp|P34931|HS71L_HUMAN	sp|P0DMV9|HS71B_HUMAN	sp|P0DMV9|HS71B_HUMAN	MSMS	2	16062020_SKO_IP_Cep78	1	exp_1	578.293	2	569.28	1136.55	NaN	NaN	NaN	NaN	NaN	NaN	NaN	NaN	NaN	NaN	6.9768	1	6.9768	6.4768	7.4768	0								0	0	0	0.0082046
YKAEDEVQRER	11	1	2	Unmodified	_YKAEDEVQRER_			0	0	2	sp|P0DMV9|HS71B_HUMAN;sp|P0DMV8|HS71A_HUMAN;sp|P0DMV8-2|HS71A_HUMAN	sp|P0DMV9|HS71B_HUMAN	sp|P0DMV9|HS71B_HUMAN	ISO-MSMS	0	16062020_SKO_IP_Cep78	1	exp_1	712.353	2	711.852	1421.69	NaN	NaN	NaN	-0.2408	-0.00017141	NaN	NaN	NaN	NaN	NaN	7.3679	0.077355	7.3679	7.3135	7.3909	-8.8818e-16								0	0	0	4.0164e-39
YKDDPVDLR	9	1	1	Unmodified	_YKDDPVDLR_			0	0	1	sp|Q9Y2W1|TR150_HUMAN	sp|Q9Y2W1|TR150_HUMAN	sp|Q9Y2W1|TR150_HUMAN	ISO-MSMS	0	16062020_SKO_IP_Cep78	1	exp_1	560.786	2	560.785	1119.56	NaN	NaN	NaN	0.16689	9.3589e-05	NaN	NaN	NaN	NaN	NaN	17.89	0.21826	17.89	17.78	17.999	-3.5527e-15								0	0	0	0.018943
YKEETIEK	8	2	0	Unmodified	_YKEETIEK_			0	0	1	sp|P61254|RL26_HUMAN	sp|P61254|RL26_HUMAN	sp|P61254|RL26_HUMAN	ISO-MSMS	2	16062020_SKO_IP_Cep78	1	exp_1	528.282	2	520.269	1038.52	NaN	NaN	NaN	-1.1461	-0.0005963	NaN	NaN	NaN	NaN	NaN	6.425	0.20112	6.425	6.3516	6.5527	0								0	0	0	0.0087355
YKEETIEK	8	2	0	Unmodified	_YKEETIEK_			0	0	1	sp|P61254|RL26_HUMAN	sp|P61254|RL26_HUMAN	sp|P61254|RL26_HUMAN	MSMS	0	16062020_SKO_IP_Cep78	1	exp_1	520.269	2	520.269	1038.52	NaN	NaN	NaN	NaN	NaN	NaN	NaN	NaN	NaN	NaN	6.4339	1	6.4339	5.9339	6.9339	0								0	0	0	1.691e-67
YLAFLRK	7	1	1	Unmodified	_YLAFLRK_			0	0	1	sp|P40429|RL13A_HUMAN	sp|P40429|RL13A_HUMAN	sp|P40429|RL13A_HUMAN	ISO-MSMS	0	16062020_SKO_IP_Cep78	1	exp_1	456.279	2	455.779	909.544	NaN	NaN	NaN	-2.0163	-0.00091898	NaN	NaN	NaN	NaN	NaN	28.473	0.21795	28.473	28.335	28.553	3.5527e-15								0	0	0	0.01659
YNGLIHRK	8	1	1	Unmodified	_YNGLIHRK_			0	0	1	sp|P46779|RL28_HUMAN;sp|P46779-2|RL28_HUMAN;sp|P46779-3|RL28_HUMAN;sp|P46779-4|RL28_HUMAN;sp|P46779-5|RL28_HUMAN	sp|P46779|RL28_HUMAN	sp|P46779|RL28_HUMAN	ISO-MSMS	2	16062020_SKO_IP_Cep78	1	exp_1	509.799	2	500.788	999.561	NaN	NaN	NaN	-0.50894	-0.00025487	NaN	NaN	NaN	NaN	NaN	6.1087	0.067013	6.1087	6.0836	6.1506	0								0	0	0	0.013812
YNGLIHRK	8	1	1	Unmodified	_YNGLIHRK_			0	0	1	sp|P46779|RL28_HUMAN;sp|P46779-2|RL28_HUMAN;sp|P46779-3|RL28_HUMAN;sp|P46779-4|RL28_HUMAN;sp|P46779-5|RL28_HUMAN	sp|P46779|RL28_HUMAN	sp|P46779|RL28_HUMAN	ISO-MSMS	0	16062020_SKO_IP_Cep78	1	exp_1	500.788	2	500.788	999.561	NaN	NaN	NaN	-0.16497	-8.2613e-05	NaN	NaN	NaN	NaN	NaN	6.1102	0.067013	6.1102	6.0836	6.1506	0								0	0	0	0.0028356
YQAVTATLEEK	11	1	0	Unmodified	_YQAVTATLEEK_			0	0	0	sp|P40429|RL13A_HUMAN;sp|Q6NVV1|R13P3_HUMAN	sp|P40429|RL13A_HUMAN	sp|P40429|RL13A_HUMAN	ISO-MSMS	2	16062020_SKO_IP_Cep78	1	exp_1	630.835	2	626.825	1251.63	NaN	NaN	NaN	2.3841	0.0014944	NaN	NaN	NaN	NaN	NaN	24.747	0.74535	24.747	24.551	25.297	3.5527e-15								0	0	0	0.00081426
YQGVNLYVK	9	1	0	Unmodified	_YQGVNLYVK_			0	0	0	sp|P11940-2|PABP1_HUMAN;sp|P11940|PABP1_HUMAN;sp|Q4VXU2|PAP1L_HUMAN;sp|Q4VXU2-2|PAP1L_HUMAN	sp|P11940-2|PABP1_HUMAN	sp|P11940-2|PABP1_HUMAN	MULTI-MSMS		16062020_SKO_IP_Cep78	1	exp_1	542.297	2	542.295	1082.58	39091.1	2.0293	0.0011005	-0.93751	-0.00050841	1.0918	0.00059207	542.295	544.307	546.302	31.491	0.21957	31.491	31.352	31.572	-3.5527e-15					74	12	9	0	0	0	4.2344e-27
YSQVLANGLDNK	12	1	0	Unmodified	_YSQVLANGLDNK_			0	0	0	sp|P62269|RS18_HUMAN	sp|P62269|RS18_HUMAN	sp|P62269|RS18_HUMAN	MULTI-MSMS		16062020_SKO_IP_Cep78	1	exp_1	665.35	2	661.341	1320.67	34894.3	1.9202	0.0012699	0.13575	8.9775e-05	2.056	0.0013597	661.341	663.353	665.348	26.781	0.32087	26.781	26.617	26.938	0					129	18	10	0	0	0	1.7551e-99
YSQYQQAIYK	10	1	0	Unmodified	_YSQYQQAIYK_			0	0	0	sp|O14744-5|ANM5_HUMAN;sp|O14744|ANM5_HUMAN;sp|O14744-3|ANM5_HUMAN;sp|O14744-2|ANM5_HUMAN;sp|O14744-4|ANM5_HUMAN	sp|O14744-5|ANM5_HUMAN	sp|O14744-5|ANM5_HUMAN	MULTI-MSMS		16062020_SKO_IP_Cep78	1	exp_1	648.334	2	646.32	1290.62	34552.8	0.96366	0.00062283	0.45711	0.00029544	1.4208	0.00091827	646.32	648.332	650.327	20.523	0.57355	20.523	20.121	20.695	0					204	33	14	0	0	0	5.0812e-111
YSQYQQAIYK	10	1	0	Unmodified	_YSQYQQAIYK_			0	0	0	sp|O14744-5|ANM5_HUMAN;sp|O14744|ANM5_HUMAN;sp|O14744-3|ANM5_HUMAN;sp|O14744-2|ANM5_HUMAN;sp|O14744-4|ANM5_HUMAN	sp|O14744-5|ANM5_HUMAN	sp|O14744-5|ANM5_HUMAN	ISO-MSMS	0	16062020_SKO_IP_Cep78	1	exp_1	646.813	2	646.32	1290.62	NaN	NaN	NaN	-6.4608	-0.0041758	NaN	NaN	NaN	NaN	NaN	23.731	0.47355	23.731	23.484	23.958	0								0	0	0	0.026303
YYLHDDREGEGSDK	14	1	1	Unmodified	_YYLHDDREGEGSDK_			0	0	1	sp|Q9Y2W1|TR150_HUMAN	sp|Q9Y2W1|TR150_HUMAN	sp|Q9Y2W1|TR150_HUMAN	ISO-MSMS	0	16062020_SKO_IP_Cep78	1	exp_1	842.364	2	842.366	1682.72	NaN	NaN	NaN	-1.6805	-0.0014156	NaN	NaN	NaN	NaN	NaN	10.94	0.3039	10.94	10.745	11.049	0								0	0	0	4.0061e-106
YYLHDDREGEGSDK	14	1	1	Unmodified	_YYLHDDREGEGSDK_			0	0	1	sp|Q9Y2W1|TR150_HUMAN	sp|Q9Y2W1|TR150_HUMAN	sp|Q9Y2W1|TR150_HUMAN	ISO-MSMS	2	16062020_SKO_IP_Cep78	1	exp_1	851.879	2	842.366	1682.72	NaN	NaN	NaN	1.825	0.0015373	NaN	NaN	NaN	NaN	NaN	10.858	0.27	10.858	10.745	11.015	0								0	0	0	2.0026e-89
AALRPLVKPK	10	2	1	Unmodified	_AALRPLVKPK_			0	0	2	sp|P62910|RL32_HUMAN	sp|P62910|RL32_HUMAN	sp|P62910|RL32_HUMAN	MULTI-MSMS		16062020_SKO_IP_Cep78	1	exp_1	373.592	3	364.913	1091.72	45683	1.0797	0.00039399	-0.045268	-1.6519e-05	1.0344	0.00037747	364.913	369.603	373.592	10.614	0.23632	10.614	10.475	10.712	0					79	13	8	0	0	0	0.011845
AAQDRDQIYR	10	0	2	Unmodified	_AAQDRDQIYR_			0	0	1	sp|P62995-3|TRA2B_HUMAN;sp|P62995|TRA2B_HUMAN	sp|P62995-3|TRA2B_HUMAN	sp|P62995-3|TRA2B_HUMAN	ISO-MSMS	0	16062020_SKO_IP_Cep78	1	exp_1	412.545	3	412.542	1234.61	NaN	NaN	NaN	2.914	0.0012021	NaN	NaN	NaN	NaN	NaN	8.1065	0.10235	8.1065	8.0833	8.1857	0								0	0	0	7.1421e-05
AARELLTLDEK	11	1	1	Unmodified	_AARELLTLDEK_			0	0	1	sp|P46781|RS9_HUMAN	sp|P46781|RS9_HUMAN	sp|P46781|RS9_HUMAN	ISO-MSMS	2	16062020_SKO_IP_Cep78	1	exp_1	426.246	3	420.238	1257.69	NaN	NaN	NaN	0.77064	0.00032385	NaN	NaN	NaN	NaN	NaN	26.874	0.25354	26.874	26.769	27.023	0								0	0	0	0.014694
AARELLTLDEK	11	1	1	Unmodified	_AARELLTLDEK_			0	0	1	sp|P46781|RS9_HUMAN	sp|P46781|RS9_HUMAN	sp|P46781|RS9_HUMAN	ISO-MSMS	0	16062020_SKO_IP_Cep78	1	exp_1	420.239	3	420.238	1257.69	NaN	NaN	NaN	1.0295	0.00043265	NaN	NaN	NaN	NaN	NaN	26.941	0.28756	26.941	26.735	27.023	0								0	0	0	0.020104
AAREPNIDR	9	0	2	Unmodified	_AAREPNIDR_			0	0	1	sp|P23588|IF4B_HUMAN;sp|P23588-2|IF4B_HUMAN	sp|P23588|IF4B_HUMAN	sp|P23588|IF4B_HUMAN	ISO-MSMS	2	16062020_SKO_IP_Cep78	1	exp_1	354.525	3	347.853	1040.54	NaN	NaN	NaN	-0.74634	-0.00025962	NaN	NaN	NaN	NaN	NaN	6.3935	0.31881	6.3935	6.3349	6.6537	0								0	0	0	0.0027615
AASIFGGAKPVDTAAR	16	1	1	Unmodified	_AASIFGGAKPVDTAAR_			0	0	1	sp|P23588|IF4B_HUMAN;sp|P23588-2|IF4B_HUMAN	sp|P23588|IF4B_HUMAN	sp|P23588|IF4B_HUMAN	ISO-MSMS	0	16062020_SKO_IP_Cep78	1	exp_1	511.614	3	511.279	1530.82	NaN	NaN	NaN	0.73433	0.00037545	NaN	NaN	NaN	NaN	NaN	27.042	0.38803	27.042	26.837	27.225	3.5527e-15								0	0	0	0.0045166
AASIFGGAKPVDTAAR	16	1	1	Unmodified	_AASIFGGAKPVDTAAR_			0	0	1	sp|P23588|IF4B_HUMAN;sp|P23588-2|IF4B_HUMAN	sp|P23588|IF4B_HUMAN	sp|P23588|IF4B_HUMAN	ISO-MSMS	2	16062020_SKO_IP_Cep78	1	exp_1	517.622	3	511.279	1530.82	NaN	NaN	NaN	-0.53096	-0.00027147	NaN	NaN	NaN	NaN	NaN	27.018	0.30393	27.018	26.854	27.158	0								0	0	0	0.020992
AEELHYPLGER	11	0	1	Unmodified	_AEELHYPLGER_			0	0	0	sp|Q14257|RCN2_HUMAN;sp|Q14257-2|RCN2_HUMAN	sp|Q14257|RCN2_HUMAN	sp|Q14257|RCN2_HUMAN	ISO-MSMS	0	16062020_SKO_IP_Cep78	1	exp_1	438.89	3	438.554	1312.64	NaN	NaN	NaN	1.0453	0.00045844	NaN	NaN	NaN	NaN	NaN	26.097	0.424	26.097	25.94	26.364	0								0	0	0	0.0015149
AEELHYPLGERR	12	0	2	Unmodified	_AEELHYPLGERR_			0	0	1	sp|Q14257|RCN2_HUMAN;sp|Q14257-2|RCN2_HUMAN	sp|Q14257|RCN2_HUMAN	sp|Q14257|RCN2_HUMAN	ISO-MSMS	0	16062020_SKO_IP_Cep78	1	exp_1	490.589	3	490.588	1468.74	NaN	NaN	NaN	0.63193	0.00031002	NaN	NaN	NaN	NaN	NaN	18.732	0.30301	18.732	18.555	18.858	0								0	0	0	0.022003
AERVHELNEEIGK	13	1	1	Unmodified	_AERVHELNEEIGK_			0	0	1	sp|Q9Y383-3|LC7L2_HUMAN;sp|Q9Y383-2|LC7L2_HUMAN;sp|Q9Y383|LC7L2_HUMAN;sp|Q96HJ9-2|FMC1_HUMAN	sp|Q9Y383-3|LC7L2_HUMAN	sp|Q9Y383-3|LC7L2_HUMAN	MSMS	0	16062020_SKO_IP_Cep78	1	exp_1	508.597	3	508.599	1522.77	NaN	NaN	NaN	NaN	NaN	NaN	NaN	NaN	NaN	NaN	14.63	1	14.63	14.13	15.13	0								0	0	0	0.011839
AFGSGYRRDDDYR	13	0	3	Unmodified	_AFGSGYRRDDDYR_			0	0	2	sp|P23588|IF4B_HUMAN;sp|P23588-2|IF4B_HUMAN	sp|P23588|IF4B_HUMAN	sp|P23588|IF4B_HUMAN	MULTI-MSMS		16062020_SKO_IP_Cep78	1	exp_1	526.575	3	526.575	1576.7	38893.2	1.6969	0.00089352	1.2404	0.00065315	2.9372	0.0015467	526.575	532.596	536.583	14.211	0.31893	14.211	14.01	14.329	0					98	18	10	0	0	0	0.00048691
AFRDVYHLNR	10	0	2	Unmodified	_AFRDVYHLNR_			0	0	1	sp|P56270-3|MAZ_HUMAN;sp|P56270|MAZ_HUMAN;sp|P56270-2|MAZ_HUMAN;sp|Q14119|VEZF1_HUMAN	sp|P56270-3|MAZ_HUMAN	sp|P56270-3|MAZ_HUMAN	ISO-MSMS	0	16062020_SKO_IP_Cep78	1	exp_1	430.896	3	430.895	1289.66	NaN	NaN	NaN	1.7531	0.00075542	NaN	NaN	NaN	NaN	NaN	19.963	0.18497	19.963	19.852	20.037	0								0	0	0	0.002039
AHAAIRENPVYEK	13	1	1	Unmodified	_AHAAIRENPVYEK_			0	0	1	sp|P46777|RL5_HUMAN	sp|P46777|RL5_HUMAN	sp|P46777|RL5_HUMAN	ISO-MSMS	2	16062020_SKO_IP_Cep78	1	exp_1	505.94	3	499.932	1496.77	NaN	NaN	NaN	-0.39877	-0.00019936	NaN	NaN	NaN	NaN	NaN	9.8645	0.2695	9.8645	9.684	9.9535	0								0	0	0	2.4876e-05
AHLSENELEALEK	13	1	0	Unmodified	_AHLSENELEALEK_			0	0	0	sp|P98175-2|RBM10_HUMAN;sp|P98175|RBM10_HUMAN;sp|P98175-4|RBM10_HUMAN;sp|P98175-3|RBM10_HUMAN	sp|P98175-2|RBM10_HUMAN	sp|P98175-2|RBM10_HUMAN	ISO-MSMS	0	16062020_SKO_IP_Cep78	1	exp_1	494.923	3	494.919	1481.74	NaN	NaN	NaN	4.5575	0.0022556	NaN	NaN	NaN	NaN	NaN	32.163	0.59641	32.163	32.015	32.612	0								0	0	0	0.010253
AHRTEFYR	8	0	2	Unmodified	_AHRTEFYR_			0	0	1	sp|Q15208|STK38_HUMAN;sp|Q9Y2H1|ST38L_HUMAN;sp|Q9Y2H1-2|ST38L_HUMAN	sp|Q15208|STK38_HUMAN;sp|Q9Y2H1|ST38L_HUMAN	sp|Q9Y2H1|ST38L_HUMAN	MULTI-MSMS		16062020_SKO_IP_Cep78	1	exp_1	360.518	3	360.518	1078.53	45875.6	0.81646	0.00029435	0.30341	0.00010939	1.1199	0.00040373	360.518	364.532	367.19	6.2762	0.18426	6.2762	6.2176	6.4019	0					44	10	9	0	0	0	5.4717e-35
AIRGHLENNPALEK	14	1	1	Unmodified	_AIRGHLENNPALEK_			0	0	1	sp|P05388-2|RLA0_HUMAN;sp|Q8NHW5|RLA0L_HUMAN;sp|P05388|RLA0_HUMAN	sp|P05388-2|RLA0_HUMAN	sp|P05388-2|RLA0_HUMAN	ISO-MSMS	0	16062020_SKO_IP_Cep78	1	exp_1	521.621	3	521.286	1560.84	NaN	NaN	NaN	0.58512	0.00030502	NaN	NaN	NaN	NaN	NaN	13.585	0.2014	13.585	13.472	13.674	0								0	0	0	9.1863e-06
AIRGHLENNPALEK	14	1	1	Unmodified	_AIRGHLENNPALEK_			0	0	1	sp|P05388-2|RLA0_HUMAN;sp|Q8NHW5|RLA0L_HUMAN;sp|P05388|RLA0_HUMAN	sp|P05388-2|RLA0_HUMAN	sp|P05388-2|RLA0_HUMAN	ISO-MSMS	2	16062020_SKO_IP_Cep78	1	exp_1	527.298	3	521.286	1560.84	NaN	NaN	NaN	2.8229	0.0014715	NaN	NaN	NaN	NaN	NaN	13.581	0.20166	13.581	13.489	13.691	1.7764e-15								0	0	0	0.00010888
ALREAHDAFR	10	0	2	Unmodified	_ALREAHDAFR_			0	0	1	sp|Q13813-3|SPTN1_HUMAN;sp|Q13813|SPTN1_HUMAN;sp|Q13813-2|SPTN1_HUMAN	sp|Q13813-3|SPTN1_HUMAN	sp|Q13813-3|SPTN1_HUMAN	ISO-MSMS	0	16062020_SKO_IP_Cep78	1	exp_1	395.875	3	395.876	1184.61	NaN	NaN	NaN	0.8865	0.00035095	NaN	NaN	NaN	NaN	NaN	9.385	0.13074	9.385	9.2843	9.415	0								0	0	0	0.0010573
ANGTTVHVGIHPSK	14	1	0	Unmodified	_ANGTTVHVGIHPSK_			0	0	0	sp|P61254|RL26_HUMAN;sp|Q9UNX3|RL26L_HUMAN	sp|P61254|RL26_HUMAN	sp|P61254|RL26_HUMAN	ISO-MSMS	0	16062020_SKO_IP_Cep78	1	exp_1	473.256	3	473.256	1416.75	NaN	NaN	NaN	-0.60886	-0.00028815	NaN	NaN	NaN	NaN	NaN	9.6004	0.20178	9.6004	9.4822	9.684	0								0	0	0	2.6744e-08
ANGTTVHVGIHPSK	14	1	0	Unmodified	_ANGTTVHVGIHPSK_			0	0	0	sp|P61254|RL26_HUMAN;sp|Q9UNX3|RL26L_HUMAN	sp|P61254|RL26_HUMAN	sp|P61254|RL26_HUMAN	ISO-MSMS	2	16062020_SKO_IP_Cep78	1	exp_1	475.926	3	473.256	1416.75	NaN	NaN	NaN	-0.70364	-0.000333	NaN	NaN	NaN	NaN	NaN	9.6068	0.185	9.6068	9.499	9.684	0								0	0	0	7.5606e-06
APNTPASGANGDGSMSQTQSGSTVK	25	1	0	Oxidation (M)	_APNTPASGANGDGSM(ox)SQTQSGSTVK_	APNTPASGANGDGSM(1)SQTQSGSTVK	APNTPASGANGDGSM(160.96)SQTQSGSTVK	0	1	0	CON__P15636	CON__P15636	CON__P15636	ISO-MSMS	0	16062020_SKO_IP_Cep78	1	exp_1	790.024	3	789.356	2365.05	NaN	NaN	NaN	0.72992	0.00057617	NaN	NaN	NaN	NaN	NaN	11.556	0.70351	11.556	11.27	11.973	1.7764e-15								0	0	0	2.1784e-54
AQGGSSDSSLALHER	15	0	1	Unmodified	_AQGGSSDSSLALHER_			0	0	0	sp|Q08378-4|GOGA3_HUMAN;sp|Q08378-2|GOGA3_HUMAN;sp|Q08378|GOGA3_HUMAN	sp|Q08378-4|GOGA3_HUMAN	sp|Q08378-4|GOGA3_HUMAN	ISO-MSMS	0	16062020_SKO_IP_Cep78	1	exp_1	505.578	3	505.578	1513.71	NaN	NaN	NaN	-1.2436	-0.00062874	NaN	NaN	NaN	NaN	NaN	13.285	0.11749	13.285	13.204	13.321	-1.7764e-15								0	0	0	0.0049438
AQIHDLVLVGGSTR	14	0	1	Unmodified	_AQIHDLVLVGGSTR_			0	0	0	sp|P0DMV9|HS71B_HUMAN;sp|P0DMV8|HS71A_HUMAN;sp|P0DMV8-2|HS71A_HUMAN	sp|P0DMV9|HS71B_HUMAN	sp|P0DMV9|HS71B_HUMAN	MULTI-MSMS		16062020_SKO_IP_Cep78	1	exp_1	489.275	3	489.276	1464.8	39371.7	3.2766	0.0016032	0.87609	0.00042865	4.1527	0.0020318	489.276	491.283	492.612	35.918	0.62877	35.918	35.636	36.265	0					224	36	9	0	0	0	0.002795
AQLRELNITAAK	12	1	1	Unmodified	_AQLRELNITAAK_			0	0	1	sp|P62081|RS7_HUMAN	sp|P62081|RS7_HUMAN	sp|P62081|RS7_HUMAN	ISO-MSMS	2	16062020_SKO_IP_Cep78	1	exp_1	449.269	3	443.261	1326.76	NaN	NaN	NaN	-0.55849	-0.00024756	NaN	NaN	NaN	NaN	NaN	24.786	0.28845	24.786	24.602	24.89	0								0	0	0	0.0088228
AQLRELNITAAK	12	1	1	Unmodified	_AQLRELNITAAK_			0	0	1	sp|P62081|RS7_HUMAN	sp|P62081|RS7_HUMAN	sp|P62081|RS7_HUMAN	ISO-MSMS	0	16062020_SKO_IP_Cep78	1	exp_1	443.597	3	443.261	1326.76	NaN	NaN	NaN	2.2947	0.0010171	NaN	NaN	NaN	NaN	NaN	24.775	0.30531	24.775	24.619	24.924	3.5527e-15								0	0	0	0.0046632
ASGNYATVISHNPETK	16	1	0	Unmodified	_ASGNYATVISHNPETK_			0	0	0	sp|P62917|RL8_HUMAN	sp|P62917|RL8_HUMAN	sp|P62917|RL8_HUMAN	ISO-MSMS	0	16062020_SKO_IP_Cep78	1	exp_1	563.614	3	563.613	1687.82	NaN	NaN	NaN	0.13173	7.4245e-05	NaN	NaN	NaN	NaN	NaN	19.042	0.37025	19.042	18.858	19.228	0								0	0	0	4.4638e-09
ASGNYATVISHNPETK	16	1	0	Unmodified	_ASGNYATVISHNPETK_			0	0	0	sp|P62917|RL8_HUMAN	sp|P62917|RL8_HUMAN	sp|P62917|RL8_HUMAN	ISO-MSMS	2	16062020_SKO_IP_Cep78	1	exp_1	566.284	3	563.613	1687.82	NaN	NaN	NaN	-1.4058	-0.00079233	NaN	NaN	NaN	NaN	NaN	19.018	0.35326	19.018	18.875	19.228	0								0	0	0	1.5283e-05
ASGRGAESPFEEK	13	1	1	Unmodified	_ASGRGAESPFEEK_			0	0	1	sp|P46821|MAP1B_HUMAN	sp|P46821|MAP1B_HUMAN	sp|P46821|MAP1B_HUMAN	ISO-MSMS	0	16062020_SKO_IP_Cep78	1	exp_1	455.553	3	455.553	1363.64	NaN	NaN	NaN	0.24672	0.00011239	NaN	NaN	NaN	NaN	NaN	11.847	0.38763	11.847	11.687	12.075	0								0	0	0	0.004994
ATAGDTHLGGEDFDNR	16	0	1	Unmodified	_ATAGDTHLGGEDFDNR_			0	0	0	sp|P0DMV9|HS71B_HUMAN;sp|P0DMV8|HS71A_HUMAN;sp|P0DMV8-2|HS71A_HUMAN;sp|P34931|HS71L_HUMAN;sp|P17066|HSP76_HUMAN;sp|P48741|HSP77_HUMAN	sp|P0DMV9|HS71B_HUMAN;sp|P17066|HSP76_HUMAN	sp|P0DMV9|HS71B_HUMAN	MULTI-MSMS		16062020_SKO_IP_Cep78	1	exp_1	562.585	3	559.248	1674.72	37070.4	0.3803	0.00021268	-0.56921	-0.00031833	-0.18891	-0.00010565	559.248	561.255	562.584	19.515	0.32066	19.515	19.346	19.666	0					204	18	15	0	0	0	5.6038e-74
ATYATSDFTLLELNNAANPAFNLFWAGWDR	30	0	1	Unmodified	_ATYATSDFTLLELNNAANPAFNLFWAGWDR_			0	0	0	CON__P15636	CON__P15636	CON__P15636	ISO-MSMS	0	16062020_SKO_IP_Cep78	1	exp_1	1130.88	3	1130.55	3388.62	NaN	NaN	NaN	-2.6897	-0.0030409	NaN	NaN	NaN	NaN	NaN	113.68	0.23471	113.68	113.57	113.81	0								0	0	0	0.013046
AVDQHNAEAQDIFGK	15	1	0	Unmodified	_AVDQHNAEAQDIFGK_			0	0	0	sp|P52732|KIF11_HUMAN	sp|P52732|KIF11_HUMAN	sp|P52732|KIF11_HUMAN	MULTI-MSMS		16062020_SKO_IP_Cep78	1	exp_1	550.936	3	548.266	1641.77	38265.1	0.83553	0.0004581	-1.286	-0.00070508	-0.45048	-0.00024698	548.265	549.941	551.271	25.81	0.49103	25.81	25.483	25.974	-3.5527e-15					131	28	10	0	0	0	1.3554e-18
AVEHMFETEDGSK	13	1	0	Oxidation (M)	_AVEHM(ox)FETEDGSK_	AVEHM(1)FETEDGSK	AVEHM(97.63)FETEDGSK	0	1	0	sp|Q9Y657|SPIN1_HUMAN	sp|Q9Y657|SPIN1_HUMAN	sp|Q9Y657|SPIN1_HUMAN	ISO-MSMS	0	16062020_SKO_IP_Cep78	1	exp_1	499.22	3	499.217	1494.63	NaN	NaN	NaN	2.3517	0.001174	NaN	NaN	NaN	NaN	NaN	12.127	0.15134	12.127	12.041	12.193	1.7764e-15								0	0	0	0.00019528
AVEHMFETEDGSK	13	1	0	Oxidation (M)	_AVEHM(ox)FETEDGSK_	AVEHM(1)FETEDGSK	AVEHM(45.61)FETEDGSK	0	1	0	sp|Q9Y657|SPIN1_HUMAN	sp|Q9Y657|SPIN1_HUMAN	sp|Q9Y657|SPIN1_HUMAN	ISO-MSMS	2	16062020_SKO_IP_Cep78	1	exp_1	501.89	3	499.217	1494.63	NaN	NaN	NaN	-0.65348	-0.00032623	NaN	NaN	NaN	NaN	NaN	12.122	0.10065	12.122	12.058	12.159	-1.7764e-15								0	0	0	0.022847
DDDYRGGGDRYEDR	14	0	3	Unmodified	_DDDYRGGGDRYEDR_			0	0	2	sp|P23588|IF4B_HUMAN;sp|P23588-2|IF4B_HUMAN	sp|P23588|IF4B_HUMAN	sp|P23588|IF4B_HUMAN	MULTI-MSMS		16062020_SKO_IP_Cep78	1	exp_1	563.569	3	563.568	1687.68	36811.2	-0.27676	-0.00015597	0.62358	0.00035143	0.34683	0.00019546	563.568	569.589	573.578	9.7404	0.26982	9.7404	9.6165	9.8863	0					79	15	8	0	0	0	8.4188e-58
DDEVQVVRGHYK	12	1	1	Unmodified	_DDEVQVVRGHYK_			0	0	1	sp|P61254|RL26_HUMAN;sp|Q9UNX3|RL26L_HUMAN	sp|P61254|RL26_HUMAN	sp|P61254|RL26_HUMAN	ISO-MSMS	2	16062020_SKO_IP_Cep78	1	exp_1	488.252	3	482.244	1443.71	NaN	NaN	NaN	-1.3621	-0.00065689	NaN	NaN	NaN	NaN	NaN	16.323	0.20142	16.323	16.214	16.415	0								0	0	0	0.0082228
DDEVQVVRGHYK	12	1	1	Unmodified	_DDEVQVVRGHYK_			0	0	1	sp|P61254|RL26_HUMAN;sp|Q9UNX3|RL26L_HUMAN	sp|P61254|RL26_HUMAN	sp|P61254|RL26_HUMAN	ISO-MSMS	0	16062020_SKO_IP_Cep78	1	exp_1	482.577	3	482.244	1443.71	NaN	NaN	NaN	-0.89665	-0.00043241	NaN	NaN	NaN	NaN	NaN	16.328	0.11749	16.328	16.264	16.381	0								0	0	0	0.00039359
DDRGPPQRPK	10	1	2	Unmodified	_DDRGPPQRPK_			0	0	2	sp|P23588|IF4B_HUMAN;sp|P23588-2|IF4B_HUMAN	sp|P23588|IF4B_HUMAN	sp|P23588|IF4B_HUMAN	MSMS	0	16062020_SKO_IP_Cep78	1	exp_1	389.208	3	389.207	1164.6	NaN	NaN	NaN	NaN	NaN	NaN	NaN	NaN	NaN	NaN	5.9434	1	5.9434	5.4434	6.4434	0								0	0	0	1.1673e-06
DDYSRDDYRR	10	0	3	Unmodified	_DDYSRDDYRR_			0	0	2	sp|P23588|IF4B_HUMAN;sp|P23588-2|IF4B_HUMAN	sp|P23588|IF4B_HUMAN	sp|P23588|IF4B_HUMAN	ISO-MSMS	2	16062020_SKO_IP_Cep78	1	exp_1	464.875	3	454.201	1359.58	NaN	NaN	NaN	2.9621	0.0013454	NaN	NaN	NaN	NaN	NaN	8.039	0.20072	8.039	7.925	8.1257	0								0	0	0	0.015234
DDYSRDDYRR	10	0	3	Unmodified	_DDYSRDDYRR_			0	0	2	sp|P23588|IF4B_HUMAN;sp|P23588-2|IF4B_HUMAN	sp|P23588|IF4B_HUMAN	sp|P23588|IF4B_HUMAN	MSMS	1	16062020_SKO_IP_Cep78	1	exp_1	460.22	3	454.201	1359.58	NaN	NaN	NaN	NaN	NaN	NaN	NaN	NaN	NaN	NaN	8.0369	1	8.0369	7.5369	8.5369	0								0	0	0	0.025722
DGLIIRKPVTVHSR	14	1	2	Unmodified	_DGLIIRKPVTVHSR_			0	0	2	sp|P84098|RL19_HUMAN	sp|P84098|RL19_HUMAN	sp|P84098|RL19_HUMAN	ISO-MSMS	0	16062020_SKO_IP_Cep78	1	exp_1	530.99	3	530.986	1589.94	NaN	NaN	NaN	0.89778	0.00047671	NaN	NaN	NaN	NaN	NaN	17.576	0.18543	17.576	17.511	17.697	0								0	0	0	0.0011899
DHDYRDMDYR	10	0	2	Oxidation (M)	_DHDYRDM(ox)DYR_	DHDYRDM(1)DYR	DHDYRDM(48.19)DYR	0	1	1	sp|P98175-2|RBM10_HUMAN;sp|P98175|RBM10_HUMAN;sp|P98175-4|RBM10_HUMAN;sp|P98175-3|RBM10_HUMAN	sp|P98175-2|RBM10_HUMAN	sp|P98175-2|RBM10_HUMAN	MSMS	0	16062020_SKO_IP_Cep78	1	exp_1	467.852	3	467.854	1400.54	NaN	NaN	NaN	NaN	NaN	NaN	NaN	NaN	NaN	NaN	9.2828	1	9.2828	8.7828	9.7828	0								0	0	0	0.026205
DIIHDPGRGAPLAK	14	1	1	Unmodified	_DIIHDPGRGAPLAK_			0	0	1	sp|P62917|RL8_HUMAN	sp|P62917|RL8_HUMAN	sp|P62917|RL8_HUMAN	ISO-MSMS	0	16062020_SKO_IP_Cep78	1	exp_1	487.607	3	487.272	1458.79	NaN	NaN	NaN	1.7735	0.00086417	NaN	NaN	NaN	NaN	NaN	23.216	0.43582	23.216	22.981	23.416	-3.5527e-15								0	0	0	6.4964e-06
DIIHDPGRGAPLAK	14	1	1	Unmodified	_DIIHDPGRGAPLAK_			0	0	1	sp|P62917|RL8_HUMAN	sp|P62917|RL8_HUMAN	sp|P62917|RL8_HUMAN	ISO-MSMS	2	16062020_SKO_IP_Cep78	1	exp_1	493.95	3	487.272	1458.79	NaN	NaN	NaN	0.7851	0.00038256	NaN	NaN	NaN	NaN	NaN	23.163	0.35184	23.163	22.981	23.332	0								0	0	0	0.013056
DLLHPSPEEEK	11	1	0	Unmodified	_DLLHPSPEEEK_			0	0	0	sp|P42677|RS27_HUMAN	sp|P42677|RS27_HUMAN	sp|P42677|RS27_HUMAN	ISO-MSMS	0	16062020_SKO_IP_Cep78	1	exp_1	431.881	3	431.882	1292.62	NaN	NaN	NaN	-0.71572	-0.00030911	NaN	NaN	NaN	NaN	NaN	23.17	0.33503	23.17	23.014	23.349	0								0	0	0	0.00071327
DLLHPSPEEEK	11	1	0	Unmodified	_DLLHPSPEEEK_			0	0	0	sp|P42677|RS27_HUMAN	sp|P42677|RS27_HUMAN	sp|P42677|RS27_HUMAN	ISO-MSMS	2	16062020_SKO_IP_Cep78	1	exp_1	434.888	3	431.882	1292.62	NaN	NaN	NaN	-0.22631	-9.774e-05	NaN	NaN	NaN	NaN	NaN	23.202	0.31825	23.202	23.014	23.332	3.5527e-15								0	0	0	0.0061572
DLVILLYETALLSSGFSLEDPQTHANR	27	0	1	Unmodified	_DLVILLYETALLSSGFSLEDPQTHANR_			0	0	0	sp|P07900|HS90A_HUMAN;sp|P07900-2|HS90A_HUMAN	sp|P07900|HS90A_HUMAN	sp|P07900|HS90A_HUMAN	ISO-MSMS	0	16062020_SKO_IP_Cep78	1	exp_1	1001.86	3	1001.52	3001.54	NaN	NaN	NaN	2.31	0.0023135	NaN	NaN	NaN	NaN	NaN	116.65	0.085907	116.65	116.61	116.7	0								0	0	0	5.7588e-47
DLVVLLFETALLSSGFSLEDPQTHSNR	27	0	1	Unmodified	_DLVVLLFETALLSSGFSLEDPQTHSNR_			0	0	0	sp|P08238|HS90B_HUMAN	sp|P08238|HS90B_HUMAN	sp|P08238|HS90B_HUMAN	ISO-MSMS	0	16062020_SKO_IP_Cep78	1	exp_1	997.186	3	996.849	2987.52	NaN	NaN	NaN	0.25222	0.00025142	NaN	NaN	NaN	NaN	NaN	116.77	0.10225	116.77	116.73	116.83	0								0	0	0	5.434e-08
DRHEASGFAR	10	0	2	Unmodified	_DRHEASGFAR_			0	0	1	sp|Q96I25|SPF45_HUMAN	sp|Q96I25|SPF45_HUMAN	sp|Q96I25|SPF45_HUMAN	ISO-MSMS	0	16062020_SKO_IP_Cep78	1	exp_1	382.52	3	382.52	1144.54	NaN	NaN	NaN	0.063788	2.44e-05	NaN	NaN	NaN	NaN	NaN	6.1255	0.10051	6.1255	6.0836	6.1841	0								0	0	0	0.0030386
DRLLASTLVHSVK	13	1	1	Unmodified	_DRLLASTLVHSVK_			0	0	1	sp|Q9NYF8-3|BCLF1_HUMAN;sp|Q9NYF8-2|BCLF1_HUMAN;sp|Q9NYF8|BCLF1_HUMAN;sp|Q9NYF8-4|BCLF1_HUMAN	sp|Q9NYF8-3|BCLF1_HUMAN	sp|Q9NYF8-3|BCLF1_HUMAN	ISO-MSMS	2	16062020_SKO_IP_Cep78	1	exp_1	486.627	3	480.284	1437.83	NaN	NaN	NaN	2.1178	0.0010171	NaN	NaN	NaN	NaN	NaN	34.068	0.5434	34.068	33.891	34.434	0								0	0	0	0.010196
DRLLASTLVHSVK	13	1	1	Unmodified	_DRLLASTLVHSVK_			0	0	1	sp|Q9NYF8-3|BCLF1_HUMAN;sp|Q9NYF8-2|BCLF1_HUMAN;sp|Q9NYF8|BCLF1_HUMAN;sp|Q9NYF8-4|BCLF1_HUMAN	sp|Q9NYF8-3|BCLF1_HUMAN	sp|Q9NYF8-3|BCLF1_HUMAN	ISO-MSMS	0	16062020_SKO_IP_Cep78	1	exp_1	480.285	3	480.284	1437.83	NaN	NaN	NaN	1.0915	0.00052421	NaN	NaN	NaN	NaN	NaN	34.079	0.45924	34.079	33.907	34.367	0								0	0	0	1.4787e-05
DTTVISHSPNTSYDTALEAR	20	0	1	Unmodified	_DTTVISHSPNTSYDTALEAR_			0	0	0	sp|Q4VCS5-2|AMOT_HUMAN;sp|Q4VCS5|AMOT_HUMAN	sp|Q4VCS5-2|AMOT_HUMAN	sp|Q4VCS5-2|AMOT_HUMAN	ISO-MSMS	1	16062020_SKO_IP_Cep78	1	exp_1	729.026	3	726.682	2177.02	NaN	NaN	NaN	1.7572	0.0012769	NaN	NaN	NaN	NaN	NaN	35.321	0.30686	35.321	35.16	35.467	0								0	0	0	2.4993e-19
DTTVISHSPNTSYDTALEAR	20	0	1	Unmodified	_DTTVISHSPNTSYDTALEAR_			0	0	0	sp|Q4VCS5-2|AMOT_HUMAN;sp|Q4VCS5|AMOT_HUMAN	sp|Q4VCS5-2|AMOT_HUMAN	sp|Q4VCS5-2|AMOT_HUMAN	ISO-MSMS	0	16062020_SKO_IP_Cep78	1	exp_1	726.686	3	726.682	2177.02	NaN	NaN	NaN	1.1761	0.00085464	NaN	NaN	NaN	NaN	NaN	35.314	0.30686	35.314	35.16	35.467	0								0	0	0	7.9082e-12
EALIRHQQLSGLHK	14	1	1	Unmodified	_EALIRHQQLSGLHK_			0	0	1	sp|P98175-2|RBM10_HUMAN;sp|P98175|RBM10_HUMAN;sp|P98175-4|RBM10_HUMAN;sp|P98175-3|RBM10_HUMAN	sp|P98175-2|RBM10_HUMAN	sp|P98175-2|RBM10_HUMAN	ISO-MSMS	2	16062020_SKO_IP_Cep78	1	exp_1	550.32	3	543.978	1628.91	NaN	NaN	NaN	0.50887	0.00027682	NaN	NaN	NaN	NaN	NaN	15.638	0.25317	15.638	15.489	15.742	1.7764e-15								0	0	0	0.002276
EAQERLTGDAFRK	13	1	2	Unmodified	_EAQERLTGDAFRK_			0	0	2	sp|O95881|TXD12_HUMAN	sp|O95881|TXD12_HUMAN	sp|O95881|TXD12_HUMAN	MULTI-MSMS		16062020_SKO_IP_Cep78	1	exp_1	507.599	3	507.599	1519.77	39315.2	1.8567	0.00094244	-0.18453	-9.3665e-05	1.6721	0.00084878	507.598	512.954	516.942	15.441	0.20202	15.441	15.338	15.54	0					52	11	7	0	0	0	1.418e-14
EATDAIGHLDR	11	0	1	Unmodified	_EATDAIGHLDR_			0	0	0	sp|Q12906-5|ILF3_HUMAN;sp|Q12906-4|ILF3_HUMAN;sp|Q12906-2|ILF3_HUMAN;sp|Q12906-6|ILF3_HUMAN;sp|Q12906-3|ILF3_HUMAN;sp|Q12906|ILF3_HUMAN;sp|Q12906-7|ILF3_HUMAN	sp|Q12906-5|ILF3_HUMAN	sp|Q12906-5|ILF3_HUMAN	ISO-MSMS	0	16062020_SKO_IP_Cep78	1	exp_1	399.866	3	399.867	1196.58	NaN	NaN	NaN	-0.34562	-0.0001382	NaN	NaN	NaN	NaN	NaN	19.042	0.23561	19.042	18.925	19.161	0								0	0	0	0.0066466
EDDVRQYVVR	10	0	2	Unmodified	_EDDVRQYVVR_			0	0	1	sp|P62753|RS6_HUMAN	sp|P62753|RS6_HUMAN	sp|P62753|RS6_HUMAN	ISO-MSMS	2	16062020_SKO_IP_Cep78	1	exp_1	433.558	3	426.886	1277.64	NaN	NaN	NaN	-0.20868	-8.9084e-05	NaN	NaN	NaN	NaN	NaN	22.922	0.21902	22.922	22.795	23.014	0								0	0	0	0.0085423
EDDVRQYVVRK	11	1	2	Unmodified	_EDDVRQYVVRK_			0	0	2	sp|P62753|RS6_HUMAN	sp|P62753|RS6_HUMAN	sp|P62753|RS6_HUMAN	ISO-MSMS	0	16062020_SKO_IP_Cep78	1	exp_1	469.586	3	469.584	1405.73	NaN	NaN	NaN	0.65474	0.00030746	NaN	NaN	NaN	NaN	NaN	17.324	0.20232	17.324	17.224	17.426	0								0	0	0	4.151e-05
EDSQRPGAHLTVK	13	1	1	Unmodified	_EDSQRPGAHLTVK_			0	0	1	sp|P09651-3|ROA1_HUMAN;sp|P09651-2|ROA1_HUMAN;sp|P09651|ROA1_HUMAN;sp|Q32P51|RA1L2_HUMAN	sp|P09651-3|ROA1_HUMAN	sp|P09651-3|ROA1_HUMAN	ISO-MSMS	2	16062020_SKO_IP_Cep78	1	exp_1	485.926	3	479.92	1436.74	NaN	NaN	NaN	-0.39845	-0.00019123	NaN	NaN	NaN	NaN	NaN	9.4234	0.14757	9.4234	9.3514	9.499	0								0	0	0	0.01013
EDSQRPGAHLTVK	13	1	1	Unmodified	_EDSQRPGAHLTVK_			0	0	1	sp|P09651-3|ROA1_HUMAN;sp|P09651-2|ROA1_HUMAN;sp|P09651|ROA1_HUMAN;sp|Q32P51|RA1L2_HUMAN	sp|P09651-3|ROA1_HUMAN	sp|P09651-3|ROA1_HUMAN	ISO-MSMS	0	16062020_SKO_IP_Cep78	1	exp_1	479.923	3	479.92	1436.74	NaN	NaN	NaN	1.0593	0.00050838	NaN	NaN	NaN	NaN	NaN	9.4451	0.14757	9.4451	9.3514	9.499	0								0	0	0	8.3272e-06
EDTEEHHLR	9	0	1	Unmodified	_EDTEEHHLR_			0	0	0	sp|P09651-3|ROA1_HUMAN;sp|P09651-2|ROA1_HUMAN;sp|P09651|ROA1_HUMAN;sp|Q32P51|RA1L2_HUMAN;sp|P22626-2|ROA2_HUMAN;sp|P22626|ROA2_HUMAN	sp|P09651-3|ROA1_HUMAN;sp|P22626-2|ROA2_HUMAN	sp|P09651-3|ROA1_HUMAN	ISO-MSMS	2	16062020_SKO_IP_Cep78	1	exp_1	392.516	3	389.179	1164.52	NaN	NaN	NaN	-0.64624	-0.0002515	NaN	NaN	NaN	NaN	NaN	1.2651	0.31897	1.2651	1.085	1.404	0								0	0	0	0.012232
EDVFVHQTAIK	11	1	0	Unmodified	_EDVFVHQTAIK_			0	0	0	sp|P16989-2|YBOX3_HUMAN;sp|P16989-3|YBOX3_HUMAN;sp|P16989|YBOX3_HUMAN;sp|Q9Y2T7|YBOX2_HUMAN;sp|P67809|YBOX1_HUMAN	sp|P16989-2|YBOX3_HUMAN;sp|P67809|YBOX1_HUMAN	sp|P67809|YBOX1_HUMAN	MULTI-MSMS		16062020_SKO_IP_Cep78	1	exp_1	429.564	3	429.563	1285.67	42678.8	2.9952	0.0012866	-0.29927	-0.00012855	2.6959	0.0011581	429.563	430.904	432.234	24.264	0.39065	24.264	24.059	24.45	0					180	22	13	0	0	0	0.0083775
EEFEHQQK	8	1	0	Unmodified	_EEFEHQQK_			0	0	0	sp|P11142|HSP7C_HUMAN	sp|P11142|HSP7C_HUMAN	sp|P11142|HSP7C_HUMAN	MULTI-MSMS		16062020_SKO_IP_Cep78	1	exp_1	359.168	3	358.833	1073.48	48030.8	-0.069178	-2.4823e-05	0.11618	4.169e-05	0.047004	1.6867e-05	358.833	360.175	361.505	1.5982	0.65416	1.5982	1.3536	2.0077	0					314	73	8	0	0	0	0.0083655
EERSSQDHVDEEVFK	15	1	1	Unmodified	_EERSSQDHVDEEVFK_			0	0	1	sp|Q9BRS2|RIOK1_HUMAN	sp|Q9BRS2|RIOK1_HUMAN	sp|Q9BRS2|RIOK1_HUMAN	ISO-MSMS	0	16062020_SKO_IP_Cep78	1	exp_1	612.285	3	611.947	1832.82	NaN	NaN	NaN	2.1331	0.0013054	NaN	NaN	NaN	NaN	NaN	17.41	0.13543	17.41	17.342	17.477	-3.5527e-15								0	0	0	1.1457e-08
EGAEEIDRHVER	12	0	2	Unmodified	_EGAEEIDRHVER_			0	0	1	sp|Q5VTL8|PR38B_HUMAN	sp|Q5VTL8|PR38B_HUMAN	sp|Q5VTL8|PR38B_HUMAN	ISO-MSMS	0	16062020_SKO_IP_Cep78	1	exp_1	480.568	3	480.567	1438.68	NaN	NaN	NaN	-0.59571	-0.00028628	NaN	NaN	NaN	NaN	NaN	12.303	0.20201	12.303	12.243	12.445	0								0	0	0	0.00047222
EHHFGSSGMTLHER	14	0	1	Oxidation (M)	_EHHFGSSGM(ox)TLHER_	EHHFGSSGM(1)TLHER	EHHFGSSGM(157.09)TLHER	0	1	0	sp|Q9Y2W1|TR150_HUMAN	sp|Q9Y2W1|TR150_HUMAN	sp|Q9Y2W1|TR150_HUMAN	MULTI-MSMS		16062020_SKO_IP_Cep78	1	exp_1	547.914	3	547.579	1639.72	38613.1	-0.21265	-0.00011644	-0.25277	-0.00013841	-0.46542	-0.00025486	547.579	549.92	550.916	6.7801	0.24994	6.7801	6.5863	6.8362	0					66	14	8	0	0	0	3.1129e-86
EHVIEALRR	9	0	2	Unmodified	_EHVIEALRR_			0	0	1	sp|P27635|RL10_HUMAN	sp|P27635|RL10_HUMAN	sp|P27635|RL10_HUMAN	ISO-MSMS	2	16062020_SKO_IP_Cep78	1	exp_1	381.557	3	374.884	1121.63	NaN	NaN	NaN	-0.58179	-0.0002181	NaN	NaN	NaN	NaN	NaN	14.27	0.20145	14.27	14.161	14.362	0								0	0	0	0.027421
EHVIEALRR	9	0	2	Unmodified	_EHVIEALRR_			0	0	1	sp|P27635|RL10_HUMAN	sp|P27635|RL10_HUMAN	sp|P27635|RL10_HUMAN	ISO-MSMS	0	16062020_SKO_IP_Cep78	1	exp_1	374.885	3	374.884	1121.63	NaN	NaN	NaN	-0.52845	-0.00019811	NaN	NaN	NaN	NaN	NaN	14.27	0.31891	14.27	14.027	14.346	0								0	0	0	1.9352e-05
EISQEAREGTQGER	14	0	2	Unmodified	_EISQEAREGTQGER_			0	0	1	sp|P19474|RO52_HUMAN;sp|P19474-2|RO52_HUMAN	sp|P19474|RO52_HUMAN	sp|P19474|RO52_HUMAN	ISO-MSMS	0	16062020_SKO_IP_Cep78	1	exp_1	530.588	3	530.589	1588.74	NaN	NaN	NaN	1.7724	0.00094041	NaN	NaN	NaN	NaN	NaN	7.9483	0.042432	7.9483	7.9184	7.9608	0								0	0	0	2.6353e-37
ELESLRIQQR	10	0	2	Unmodified	_ELESLRIQQR_			0	0	1	sp|Q4VCS5-2|AMOT_HUMAN;sp|Q4VCS5|AMOT_HUMAN	sp|Q4VCS5-2|AMOT_HUMAN	sp|Q4VCS5-2|AMOT_HUMAN	ISO-MSMS	1	16062020_SKO_IP_Cep78	1	exp_1	428.587	3	424.574	1270.7	NaN	NaN	NaN	0.022011	9.3452e-06	NaN	NaN	NaN	NaN	NaN	22.19	0.3409	22.19	22.021	22.362	0								0	0	0	0.0034683
ELESLRIQQR	10	0	2	Unmodified	_ELESLRIQQR_			0	0	1	sp|Q4VCS5-2|AMOT_HUMAN;sp|Q4VCS5|AMOT_HUMAN	sp|Q4VCS5-2|AMOT_HUMAN	sp|Q4VCS5-2|AMOT_HUMAN	ISO-MSMS	0	16062020_SKO_IP_Cep78	1	exp_1	424.909	3	424.574	1270.7	NaN	NaN	NaN	0.24069	0.00010219	NaN	NaN	NaN	NaN	NaN	22.197	0.34435	22.197	22.034	22.379	0								0	0	0	0.012205
ELRENTQTTIK	11	1	1	Unmodified	_ELRENTQTTIK_			0	0	1	sp|P61978-3|HNRPK_HUMAN;sp|P61978|HNRPK_HUMAN;sp|P61978-2|HNRPK_HUMAN	sp|P61978-3|HNRPK_HUMAN	sp|P61978-3|HNRPK_HUMAN	MSMS	0	16062020_SKO_IP_Cep78	1	exp_1	444.908	3	444.909	1331.7	NaN	NaN	NaN	NaN	NaN	NaN	NaN	NaN	NaN	NaN	9.6962	1	9.6962	9.1962	10.196	0								0	0	0	6.5183e-06
ENRGINTLER	10	0	2	Unmodified	_ENRGINTLER_			0	0	1	sp|P52732|KIF11_HUMAN	sp|P52732|KIF11_HUMAN	sp|P52732|KIF11_HUMAN	ISO-MSMS	1	16062020_SKO_IP_Cep78	1	exp_1	405.228	3	401.214	1200.62	NaN	NaN	NaN	1.7473	0.00070103	NaN	NaN	NaN	NaN	NaN	13.201	0.21881	13.201	13.086	13.305	0								0	0	0	0.001368
EQIVPKPEEEVAQK	14	2	0	Unmodified	_EQIVPKPEEEVAQK_			0	0	1	sp|P18621|RL17_HUMAN;sp|P18621-3|RL17_HUMAN;sp|P18621-2|RL17_HUMAN	sp|P18621|RL17_HUMAN	sp|P18621|RL17_HUMAN	ISO-MSMS	0	16062020_SKO_IP_Cep78	1	exp_1	541.958	3	541.958	1622.85	NaN	NaN	NaN	0.61947	0.00033572	NaN	NaN	NaN	NaN	NaN	20.529	0.30313	20.529	20.375	20.678	0								0	0	0	0.0074741
EQIVPKPEEEVAQK	14	2	0	Unmodified	_EQIVPKPEEEVAQK_			0	0	1	sp|P18621|RL17_HUMAN;sp|P18621-3|RL17_HUMAN;sp|P18621-2|RL17_HUMAN	sp|P18621|RL17_HUMAN	sp|P18621|RL17_HUMAN	ISO-MSMS	2	16062020_SKO_IP_Cep78	1	exp_1	547.301	3	541.958	1622.85	NaN	NaN	NaN	1.0327	0.00055967	NaN	NaN	NaN	NaN	NaN	20.542	0.30389	20.542	20.34	20.644	0								0	0	0	0.014617
ERFAGVDIR	9	0	2	Unmodified	_ERFAGVDIR_			0	0	1	sp|P62249|RS16_HUMAN	sp|P62249|RS16_HUMAN	sp|P62249|RS16_HUMAN	ISO-MSMS	2	16062020_SKO_IP_Cep78	1	exp_1	361.534	3	354.861	1061.56	NaN	NaN	NaN	-0.73561	-0.00026104	NaN	NaN	NaN	NaN	NaN	27.369	0.27052	27.369	27.208	27.479	0								0	0	0	0.025538
ERHPGSFDVVHVK	13	1	1	Unmodified	_ERHPGSFDVVHVK_			0	0	1	sp|P62701|RS4X_HUMAN;sp|P22090|RS4Y1_HUMAN	sp|P62701|RS4X_HUMAN	sp|P62701|RS4X_HUMAN	ISO-MSMS	0	16062020_SKO_IP_Cep78	1	exp_1	502.934	3	502.932	1505.77	NaN	NaN	NaN	-1.3647	-0.00068634	NaN	NaN	NaN	NaN	NaN	16.802	0.40442	16.802	16.5	16.904	0								0	0	0	3.8961e-20
ERHQVQLLGR	10	0	2	Unmodified	_ERHQVQLLGR_			0	0	1	sp|Q9BUQ8|DDX23_HUMAN	sp|Q9BUQ8|DDX23_HUMAN	sp|Q9BUQ8|DDX23_HUMAN	ISO-MSMS	0	16062020_SKO_IP_Cep78	1	exp_1	412.571	3	412.57	1234.69	NaN	NaN	NaN	-0.64801	-0.00026735	NaN	NaN	NaN	NaN	NaN	13.632	0.16838	13.632	13.54	13.708	0								0	0	0	2.6237e-05
ERIQNAGGSVMIQR	14	0	2	Oxidation (M)	_ERIQNAGGSVM(ox)IQR_	ERIQNAGGSVM(1)IQR	ERIQNAGGSVM(136.1)IQR	0	1	1	sp|O75688|PPM1B_HUMAN;sp|O75688-4|PPM1B_HUMAN;sp|O75688-2|PPM1B_HUMAN;sp|O75688-5|PPM1B_HUMAN;sp|P35813-2|PPM1A_HUMAN;sp|P35813|PPM1A_HUMAN;sp|P35813-3|PPM1A_HUMAN	sp|O75688|PPM1B_HUMAN	sp|O75688|PPM1B_HUMAN	ISO-MSMS	0	16062020_SKO_IP_Cep78	1	exp_1	525.943	3	525.607	1573.8	NaN	NaN	NaN	-0.88256	-0.00046388	NaN	NaN	NaN	NaN	NaN	15.922	0.31996	15.922	15.692	16.011	0								0	0	0	3.1577e-08
ERLGLTEIRK	10	1	2	Unmodified	_ERLGLTEIRK_			0	0	2	sp|Q8WWY3-4|PRP31_HUMAN;sp|Q8WWY3|PRP31_HUMAN	sp|Q8WWY3-4|PRP31_HUMAN	sp|Q8WWY3-4|PRP31_HUMAN	MULTI-MSMS		16062020_SKO_IP_Cep78	1	exp_1	405.579	3	405.579	1213.71	43980	2.0926	0.00084873	-0.14402	-5.8412e-05	1.9486	0.00079032	405.579	410.934	414.922	17.198	0.25259	17.198	17.056	17.308	0					103	14	11	0	0	0	5.2468e-93
EYSGFAGVSRPR	12	0	2	Unmodified	_EYSGFAGVSRPR_			0	0	1	sp|Q9NYF8-3|BCLF1_HUMAN;sp|Q9NYF8-2|BCLF1_HUMAN;sp|Q9NYF8|BCLF1_HUMAN;sp|Q9NYF8-4|BCLF1_HUMAN	sp|Q9NYF8-3|BCLF1_HUMAN	sp|Q9NYF8-3|BCLF1_HUMAN	MULTI-MSMS		16062020_SKO_IP_Cep78	1	exp_1	442.559	3	442.558	1324.65	41671.2	0.76152	0.00033702	1.333	0.00058994	2.0945	0.00092696	442.559	446.572	449.231	20.452	0.32068	20.452	20.307	20.627	0					84	18	9	0	0	0	0.004997
FHPIQGHRVEVK	12	1	1	Unmodified	_FHPIQGHRVEVK_			0	0	1	sp|Q13151|ROA0_HUMAN	sp|Q13151|ROA0_HUMAN	sp|Q13151|ROA0_HUMAN	ISO-MSMS	0	16062020_SKO_IP_Cep78	1	exp_1	483.272	3	482.937	1445.79	NaN	NaN	NaN	0.29904	0.00014442	NaN	NaN	NaN	NaN	NaN	11.577	0.15063	11.577	11.503	11.654	0								0	0	0	0.014832
FHPIQGHRVEVK	12	1	1	Unmodified	_FHPIQGHRVEVK_			0	0	1	sp|Q13151|ROA0_HUMAN	sp|Q13151|ROA0_HUMAN	sp|Q13151|ROA0_HUMAN	ISO-MSMS	2	16062020_SKO_IP_Cep78	1	exp_1	488.944	3	482.937	1445.79	NaN	NaN	NaN	2.5073	0.0012109	NaN	NaN	NaN	NaN	NaN	11.57	0.13442	11.57	11.519	11.654	0								0	0	0	0.016119
FKDLGEEHFK	10	2	0	Unmodified	_FKDLGEEHFK_			0	0	1	CON__P02769	CON__P02769	CON__P02769	ISO-MSMS	0	16062020_SKO_IP_Cep78	1	exp_1	417.214	3	417.212	1248.61	NaN	NaN	NaN	-0.8064	-0.00033644	NaN	NaN	NaN	NaN	NaN	17.492	0.18618	17.492	17.426	17.613	0								0	0	0	0.004417
FKREFIQEPAK	11	2	1	Unmodified	_FKREFIQEPAK_			0	0	2	sp|O14744-5|ANM5_HUMAN;sp|O14744|ANM5_HUMAN;sp|O14744-3|ANM5_HUMAN;sp|O14744-2|ANM5_HUMAN;sp|O14744-4|ANM5_HUMAN	sp|O14744-5|ANM5_HUMAN	sp|O14744-5|ANM5_HUMAN	ISO-MSMS	1	16062020_SKO_IP_Cep78	1	exp_1	469.619	3	464.926	1391.76	NaN	NaN	NaN	0.65431	0.00030421	NaN	NaN	NaN	NaN	NaN	15.815	0.23539	15.815	15.709	15.944	0								0	0	0	0.0036027
FPPYNGFGSEEDSLR	15	0	1	Unmodified	_FPPYNGFGSEEDSLR_			0	0	0	sp|Q5JST6|EFHC2_HUMAN	sp|Q5JST6|EFHC2_HUMAN	sp|Q5JST6|EFHC2_HUMAN	ISO-MSMS	0	16062020_SKO_IP_Cep78	1	exp_1	572.263	3	572.262	1713.76	NaN	NaN	NaN	1.7627	0.0010087	NaN	NaN	NaN	NaN	NaN	6.3651	0.083764	6.3651	6.3181	6.4019	-8.8818e-16								0	0	0	0.0049972
FQDELESGKRPK	12	2	1	Unmodified	_FQDELESGKRPK_			0	0	2	sp|O15042-2|SR140_HUMAN;sp|O15042|SR140_HUMAN;sp|O15042-3|SR140_HUMAN	sp|O15042-2|SR140_HUMAN	sp|O15042-2|SR140_HUMAN	MSMS	0	16062020_SKO_IP_Cep78	1	exp_1	478.919	3	478.584	1432.73	NaN	NaN	NaN	NaN	NaN	NaN	NaN	NaN	NaN	NaN	11.942	1	11.942	11.442	12.442	0								0	0	0	0.0102
FQHPSHELLK	10	1	0	Unmodified	_FQHPSHELLK_			0	0	0	sp|Q6PKG0-3|LARP1_HUMAN;sp|Q6PKG0|LARP1_HUMAN;sp|Q659C4-7|LAR1B_HUMAN;sp|Q659C4-6|LAR1B_HUMAN;sp|Q659C4-5|LAR1B_HUMAN;sp|Q659C4-9|LAR1B_HUMAN;sp|Q659C4-2|LAR1B_HUMAN;sp|Q659C4|LAR1B_HUMAN	sp|Q6PKG0-3|LARP1_HUMAN	sp|Q6PKG0-3|LARP1_HUMAN	MSMS	0	16062020_SKO_IP_Cep78	1	exp_1	412.556	3	412.556	1234.65	NaN	NaN	NaN	NaN	NaN	NaN	NaN	NaN	NaN	NaN	13.93	1	13.93	13.43	14.43	0								0	0	0	0.00099151
FRPAGAAPRPPPK	13	1	2	Unmodified	_FRPAGAAPRPPPK_			0	0	2	sp|Q5JNZ5|RS26L_HUMAN;sp|P62854|RS26_HUMAN	sp|Q5JNZ5|RS26L_HUMAN	sp|Q5JNZ5|RS26L_HUMAN	ISO-MSMS	0	16062020_SKO_IP_Cep78	1	exp_1	454.596	3	454.598	1360.77	NaN	NaN	NaN	-2.4162	-0.0010984	NaN	NaN	NaN	NaN	NaN	9.4677	0.18114	9.4677	9.3682	9.5493	0								0	0	0	7.5487e-05
FRSHEGETAYIR	12	0	2	Unmodified	_FRSHEGETAYIR_			0	0	1	sp|Q07955|SRSF1_HUMAN	sp|Q07955|SRSF1_HUMAN	sp|Q07955|SRSF1_HUMAN	ISO-MSMS	0	16062020_SKO_IP_Cep78	1	exp_1	489.244	3	489.244	1464.71	NaN	NaN	NaN	0.16905	8.2705e-05	NaN	NaN	NaN	NaN	NaN	12.541	0.25228	12.541	12.429	12.681	0								0	0	0	0.00036185
FSGVPDRFSGSGSGTDFTLK	20	1	1	Unmodified	_FSGVPDRFSGSGSGTDFTLK_			0	0	1	sp|A2NJV5|KV229_HUMAN;sp|A0A0A0MRZ7|KVD26_HUMAN;sp|A0A075B6S2|KVD29_HUMAN	sp|A2NJV5|KV229_HUMAN	sp|A2NJV5|KV229_HUMAN	ISO-MSMS	0	16062020_SKO_IP_Cep78	1	exp_1	687.925	3	688.001	2060.98	NaN	NaN	NaN	0.097289	6.6935e-05	NaN	NaN	NaN	NaN	NaN	49.838	1.6289	49.838	49.38	51.008	0								0	0	0	1.8556e-64
FTISRDNAK	9	1	1	Unmodified	_FTISRDNAK_			0	0	1	sp|P01780|HV307_HUMAN;sp|P01763|HV348_HUMAN;sp|P01762|HV311_HUMAN;sp|A0A0C4DH32|HV320_HUMAN;sp|A0A0B4J1X5|HV374_HUMAN;sp|A0A0B4J1V1|HV321_HUMAN;sp|P01782|HV309_HUMAN	sp|P01780|HV307_HUMAN	sp|P01780|HV307_HUMAN	ISO-MSMS	0	16062020_SKO_IP_Cep78	1	exp_1	351.189	3	351.189	1050.55	NaN	NaN	NaN	-0.41321	-0.00014511	NaN	NaN	NaN	NaN	NaN	12.105	0.20207	12.105	11.973	12.176	1.7764e-15								0	0	0	0.0070983
FYEEVHDLERK	11	1	1	Unmodified	_FYEEVHDLERK_			0	0	1	sp|Q99733|NP1L4_HUMAN;sp|Q99733-2|NP1L4_HUMAN;sp|P55209-3|NP1L1_HUMAN;sp|P55209-2|NP1L1_HUMAN;sp|P55209|NP1L1_HUMAN	sp|Q99733|NP1L4_HUMAN	sp|Q99733|NP1L4_HUMAN	ISO-MSMS	0	16062020_SKO_IP_Cep78	1	exp_1	489.244	3	488.909	1463.7	NaN	NaN	NaN	-0.1017	-4.9724e-05	NaN	NaN	NaN	NaN	NaN	21.212	0.45485	21.212	21.013	21.468	0								0	0	0	0.0029012
FYEEVHDLERK	11	1	1	Unmodified	_FYEEVHDLERK_			0	0	1	sp|Q99733|NP1L4_HUMAN;sp|Q99733-2|NP1L4_HUMAN;sp|P55209-3|NP1L1_HUMAN;sp|P55209-2|NP1L1_HUMAN;sp|P55209|NP1L1_HUMAN	sp|Q99733|NP1L4_HUMAN	sp|Q99733|NP1L4_HUMAN	MSMS	0	16062020_SKO_IP_Cep78	1	exp_1	488.911	3	488.909	1463.7	NaN	NaN	NaN	NaN	NaN	NaN	NaN	NaN	NaN	NaN	34.184	1	34.184	33.684	34.684	0								0	0	0	0.022301
GAFGKPQGTVAR	12	1	1	Unmodified	_GAFGKPQGTVAR_			0	0	1	sp|P27635|RL10_HUMAN;sp|Q96L21|RL10L_HUMAN	sp|P27635|RL10_HUMAN	sp|P27635|RL10_HUMAN	ISO-MSMS	0	16062020_SKO_IP_Cep78	1	exp_1	396.888	3	396.888	1187.64	NaN	NaN	NaN	1.6606	0.00065907	NaN	NaN	NaN	NaN	NaN	9.8612	0.3034	9.8612	9.6668	9.9702	0								0	0	0	0.00035545
GATYGKPVHHGVNQLK	16	2	0	Unmodified	_GATYGKPVHHGVNQLK_			0	0	1	sp|P61313|RL15_HUMAN;sp|P61313-2|RL15_HUMAN	sp|P61313|RL15_HUMAN	sp|P61313|RL15_HUMAN	ISO-MSMS	2	16062020_SKO_IP_Cep78	1	exp_1	574.986	3	569.309	1704.91	NaN	NaN	NaN	-0.0017324	-9.8628e-07	NaN	NaN	NaN	NaN	NaN	6.4697	0.11732	6.4697	6.4019	6.5192	0								0	0	0	1.2267e-08
GGGHVAQIYAIR	12	0	1	Unmodified	_GGGHVAQIYAIR_			0	0	0	sp|P62249|RS16_HUMAN	sp|P62249|RS16_HUMAN	sp|P62249|RS16_HUMAN	ISO-MSMS	2	16062020_SKO_IP_Cep78	1	exp_1	417.9	3	414.563	1240.67	NaN	NaN	NaN	0.37631	0.000156	NaN	NaN	NaN	NaN	NaN	20.39	0.28707	20.39	20.29	20.577	0								0	0	0	0.0062712
GGGHVAQIYAIR	12	0	1	Unmodified	_GGGHVAQIYAIR_			0	0	0	sp|P62249|RS16_HUMAN	sp|P62249|RS16_HUMAN	sp|P62249|RS16_HUMAN	ISO-MSMS	0	16062020_SKO_IP_Cep78	1	exp_1	414.564	3	414.563	1240.67	NaN	NaN	NaN	0.61952	0.00025683	NaN	NaN	NaN	NaN	NaN	20.382	0.21909	20.382	20.29	20.509	0								0	0	0	0.00019232
GGSHGLFGNSTAQSR	15	0	1	Unmodified	_GGSHGLFGNSTAQSR_			0	0	0	sp|Q9UPQ9-2|TNR6B_HUMAN;sp|Q9UPQ9-1|TNR6B_HUMAN	sp|Q9UPQ9-2|TNR6B_HUMAN	sp|Q9UPQ9-2|TNR6B_HUMAN	ISO-MSMS	0	16062020_SKO_IP_Cep78	1	exp_1	492.572	3	492.571	1474.69	NaN	NaN	NaN	0.056093	2.763e-05	NaN	NaN	NaN	NaN	NaN	13.877	0.15097	13.877	13.775	13.926	0								0	0	0	0.0090645
GIPHLVTHDAR	11	0	1	Unmodified	_GIPHLVTHDAR_			0	0	0	sp|P62701|RS4X_HUMAN;sp|Q8TD47|RS4Y2_HUMAN;sp|P22090|RS4Y1_HUMAN	sp|P62701|RS4X_HUMAN	sp|P62701|RS4X_HUMAN	ISO-MSMS	0	16062020_SKO_IP_Cep78	1	exp_1	406.562	3	405.891	1214.65	NaN	NaN	NaN	0.031596	1.2824e-05	NaN	NaN	NaN	NaN	NaN	15.354	0.43044	15.354	15.16	15.59	0								0	0	0	0.0081929
GPQNATDSYVHK	12	1	0	Unmodified	_GPQNATDSYVHK_			0	0	0	sp|O43660-2|PLRG1_HUMAN;sp|O43660|PLRG1_HUMAN	sp|O43660-2|PLRG1_HUMAN	sp|O43660-2|PLRG1_HUMAN	ISO-MSMS	0	16062020_SKO_IP_Cep78	1	exp_1	439.546	3	439.546	1315.62	NaN	NaN	NaN	-0.3131	-0.00013762	NaN	NaN	NaN	NaN	NaN	10.33	0.25211	10.33	10.155	10.408	0								0	0	0	0.0046216
GREVYRHFGK	10	1	2	Unmodified	_GREVYRHFGK_			0	0	2	sp|Q07020|RL18_HUMAN;sp|Q07020-2|RL18_HUMAN	sp|Q07020|RL18_HUMAN	sp|Q07020|RL18_HUMAN	MULTI-MSMS		16062020_SKO_IP_Cep78	1	exp_1	426.235	3	416.891	1247.65	42665.6	0.87407	0.00036439	-0.75815	-0.00031607	0.11592	4.8327e-05	416.892	422.246	426.234	6.2938	0.15076	6.2938	6.2344	6.3851	8.8818e-16					34	8	10	0	0	0	0.012579
GYMRIQQFRK	10	1	2	Oxidation (M)	_GYM(ox)RIQQFRK_	GYM(1)RIQQFRK	GYM(100.57)RIQQFRK	0	1	2	sp|P0C0L4-2|CO4A_HUMAN;sp|P0C0L5|CO4B_HUMAN;sp|P0C0L4|CO4A_HUMAN	sp|P0C0L4-2|CO4A_HUMAN	sp|P0C0L4-2|CO4A_HUMAN	ISO-MSMS	0	16062020_SKO_IP_Cep78	1	exp_1	448.574	3	448.24	1341.7	NaN	NaN	NaN	0.22657	0.00010156	NaN	NaN	NaN	NaN	NaN	10.064	0.2188	10.064	9.987	10.206	0								0	0	0	0.0013345
HGGGGGGFGGGGFGSR	16	0	1	Unmodified	_HGGGGGGFGGGGFGSR_			0	0	0	sp|P35908|K22E_HUMAN;CON__P35908v2;CON__P35908	sp|P35908|K22E_HUMAN	sp|P35908|K22E_HUMAN	ISO-MSMS	0	16062020_SKO_IP_Cep78	1	exp_1	440.866	3	440.866	1319.58	NaN	NaN	NaN	-0.0089431	-3.9427e-06	NaN	NaN	NaN	NaN	NaN	14.451	0.18444	14.451	14.346	14.53	0								0	0	0	7.1043e-09
HGSYEDAVHSGALND	15	0	0	Unmodified	_HGSYEDAVHSGALND_			0	0	0	sp|P17987|TCPA_HUMAN	sp|P17987|TCPA_HUMAN	sp|P17987|TCPA_HUMAN	ISO-MSMS	-1	16062020_SKO_IP_Cep78	1	exp_1	524.895	3	524.562	1570.66	NaN	NaN	NaN	-1.0408	-0.00054599	NaN	NaN	NaN	NaN	NaN	20.238	0.1689	20.238	20.155	20.323	0								0	0	0	0.016633
HIEIRDQALSNAQAK	15	1	1	Unmodified	_HIEIRDQALSNAQAK_			0	0	1	sp|Q4VCS5-2|AMOT_HUMAN;sp|Q4VCS5|AMOT_HUMAN	sp|Q4VCS5-2|AMOT_HUMAN	sp|Q4VCS5-2|AMOT_HUMAN	ISO-MSMS	1	16062020_SKO_IP_Cep78	1	exp_1	568.988	3	565.304	1692.89	NaN	NaN	NaN	-0.12822	-7.2486e-05	NaN	NaN	NaN	NaN	NaN	17.533	0.38771	17.533	17.376	17.764	0								0	0	0	3.1408e-126
HIEIRDQALSNAQAK	15	1	1	Unmodified	_HIEIRDQALSNAQAK_			0	0	1	sp|Q4VCS5-2|AMOT_HUMAN;sp|Q4VCS5|AMOT_HUMAN	sp|Q4VCS5-2|AMOT_HUMAN	sp|Q4VCS5-2|AMOT_HUMAN	ISO-MSMS	0	16062020_SKO_IP_Cep78	1	exp_1	565.305	3	565.304	1692.89	NaN	NaN	NaN	-0.037501	-2.1199e-05	NaN	NaN	NaN	NaN	NaN	17.546	0.27017	17.546	17.426	17.697	0								0	0	0	1.4821e-61
HMLPSGFRK	9	1	1	Oxidation (M)	_HM(ox)LPSGFRK_	HM(1)LPSGFRK	HM(65.31)LPSGFRK	0	1	1	sp|P62910|RL32_HUMAN	sp|P62910|RL32_HUMAN	sp|P62910|RL32_HUMAN	ISO-MSMS	2	16062020_SKO_IP_Cep78	1	exp_1	369.535	3	363.527	1087.56	NaN	NaN	NaN	-0.51139	-0.00018591	NaN	NaN	NaN	NaN	NaN	9.4532	0.24823	9.4532	9.3011	9.5493	0								0	0	0	0.0092069
HMLPSGFRK	9	1	1	Oxidation (M)	_HM(ox)LPSGFRK_	HM(1)LPSGFRK	HM(59.35)LPSGFRK	0	1	1	sp|P62910|RL32_HUMAN	sp|P62910|RL32_HUMAN	sp|P62910|RL32_HUMAN	ISO-MSMS	0	16062020_SKO_IP_Cep78	1	exp_1	363.528	3	363.527	1087.56	NaN	NaN	NaN	0.32278	0.00011734	NaN	NaN	NaN	NaN	NaN	9.4353	0.29856	9.4353	9.2843	9.5828	0								0	0	0	0.011774
HMYHSLYLK	9	1	0	Oxidation (M)	_HM(ox)YHSLYLK_	HM(1)YHSLYLK	HM(113.74)YHSLYLK	0	1	0	sp|P84098|RL19_HUMAN	sp|P84098|RL19_HUMAN	sp|P84098|RL19_HUMAN	MULTI-MSMS		16062020_SKO_IP_Cep78	1	exp_1	403.203	3	403.202	1206.59	44074	1.076	0.00043385	-0.069886	-2.8178e-05	1.0061	0.00040567	403.202	404.544	405.874	13.807	0.45323	13.807	13.691	14.144	-1.7764e-15					143	26	9	0	0	0	4.6469e-19
HPGSFDVVHVK	11	1	0	Unmodified	_HPGSFDVVHVK_			0	0	0	sp|P62701|RS4X_HUMAN;sp|P22090|RS4Y1_HUMAN	sp|P62701|RS4X_HUMAN	sp|P62701|RS4X_HUMAN	MULTI-MSMS		16062020_SKO_IP_Cep78	1	exp_1	410.556	3	407.884	1220.63	43242.5	1.9869	0.00081042	-0.090416	-3.6879e-05	1.8965	0.00077354	407.884	409.227	410.555	18.644	0.45465	18.644	18.488	18.942	0					134	26	9	0	0	0	7.4692e-116
HQMMSEGKIHR	11	1	1	Oxidation (M)	_HQM(ox)MSEGKIHR_	HQM(0.5)M(0.5)SEGKIHR	HQM(0)M(0)SEGKIHR	0	1	1	sp|Q8WZ42-11|TITIN_HUMAN;sp|Q8WZ42-4|TITIN_HUMAN;sp|Q8WZ42-7|TITIN_HUMAN;sp|Q8WZ42-2|TITIN_HUMAN;sp|Q8WZ42|TITIN_HUMAN;sp|Q8WZ42-8|TITIN_HUMAN;sp|Q8WZ42-13|TITIN_HUMAN;sp|Q8WZ42-12|TITIN_HUMAN;sp|Q8WZ42-3|TITIN_HUMAN;sp|Q8WZ42-10|TITIN_HUMAN;sp|Q8WZ42-9|TITIN_HUMAN;sp|Q8WZ42-5|TITIN_HUMAN	sp|Q8WZ42-11|TITIN_HUMAN	sp|Q8WZ42-11|TITIN_HUMAN	MSMS	0	16062020_SKO_IP_Cep78	1	exp_1	457.224	3	457.22	1368.64	NaN	NaN	NaN	NaN	NaN	NaN	NaN	NaN	NaN	NaN	112.86	1	112.86	112.36	113.36	0								0	0	0	0.019411
HRAQVIYTR	9	0	2	Unmodified	_HRAQVIYTR_			0	0	1	sp|P62851|RS25_HUMAN	sp|P62851|RS25_HUMAN	sp|P62851|RS25_HUMAN	ISO-MSMS	2	16062020_SKO_IP_Cep78	1	exp_1	388.557	3	381.884	1142.63	NaN	NaN	NaN	0.07105	2.7133e-05	NaN	NaN	NaN	NaN	NaN	6.3111	0.15076	6.3111	6.2679	6.4186	0								0	0	0	0.0020588
HRAQVIYTR	9	0	2	Unmodified	_HRAQVIYTR_			0	0	1	sp|P62851|RS25_HUMAN	sp|P62851|RS25_HUMAN	sp|P62851|RS25_HUMAN	ISO-MSMS	0	16062020_SKO_IP_Cep78	1	exp_1	381.884	3	381.884	1142.63	NaN	NaN	NaN	-0.47508	-0.00018143	NaN	NaN	NaN	NaN	NaN	6.3241	0.15076	6.3241	6.2679	6.4186	0								0	0	0	2.168e-05
HSGPNSADSANDGFVR	16	0	1	Unmodified	_HSGPNSADSANDGFVR_			0	0	0	sp|P52597|HNRPF_HUMAN	sp|P52597|HNRPF_HUMAN	sp|P52597|HNRPF_HUMAN	ISO-MSMS	0	16062020_SKO_IP_Cep78	1	exp_1	544.58	3	544.245	1629.71	NaN	NaN	NaN	1.4518	0.00079016	NaN	NaN	NaN	NaN	NaN	13.775	0.13448	13.775	13.691	13.825	0								0	0	0	0.003306
HSVHTLVFR	9	0	1	Unmodified	_HSVHTLVFR_			0	0	0	sp|O43660-2|PLRG1_HUMAN;sp|O43660|PLRG1_HUMAN	sp|O43660-2|PLRG1_HUMAN	sp|O43660-2|PLRG1_HUMAN	ISO-MSMS	0	16062020_SKO_IP_Cep78	1	exp_1	365.874	3	365.873	1094.6	NaN	NaN	NaN	-1.747	-0.00063918	NaN	NaN	NaN	NaN	NaN	15.888	0.37066	15.888	15.742	16.113	1.7764e-15								0	0	0	0.00068059
HTGPNSPDTANDGFVR	16	0	1	Unmodified	_HTGPNSPDTANDGFVR_			0	0	0	sp|P55795|HNRH2_HUMAN;sp|P31943|HNRH1_HUMAN	sp|P55795|HNRH2_HUMAN	sp|P55795|HNRH2_HUMAN	ISO-MSMS	2	16062020_SKO_IP_Cep78	1	exp_1	565.599	3	562.261	1683.76	NaN	NaN	NaN	2.7093	0.0015234	NaN	NaN	NaN	NaN	NaN	16.601	0.15162	16.601	16.517	16.668	3.5527e-15								0	0	0	0.0035921
HVVFIAQRR	9	0	2	Unmodified	_HVVFIAQRR_			0	0	1	sp|P62081|RS7_HUMAN	sp|P62081|RS7_HUMAN	sp|P62081|RS7_HUMAN	ISO-MSMS	0	16062020_SKO_IP_Cep78	1	exp_1	375.893	3	375.893	1124.66	NaN	NaN	NaN	-0.47809	-0.00017971	NaN	NaN	NaN	NaN	NaN	12.322	0.35322	12.322	12.21	12.563	0								0	0	0	1.2765e-17
IADRLGLELGK	11	1	1	Unmodified	_IADRLGLELGK_			0	0	1	sp|P60891|PRPS1_HUMAN;sp|P21108|PRPS3_HUMAN	sp|P60891|PRPS1_HUMAN	sp|P60891|PRPS1_HUMAN	MULTI-MSMS		16062020_SKO_IP_Cep78	1	exp_1	395.572	3	395.571	1183.69	43858.4	2.7808	0.0011	0.065277	2.5822e-05	2.8461	0.0011258	395.571	398.92	401.579	35.063	0.35641	35.063	34.923	35.28	0					116	20	9	0	0	0	0.005365
IFAPNHVVAK	10	1	0	Unmodified	_IFAPNHVVAK_			0	0	0	sp|Q02543|RL18A_HUMAN	sp|Q02543|RL18A_HUMAN	sp|Q02543|RL18A_HUMAN	MULTI-MSMS		16062020_SKO_IP_Cep78	1	exp_1	368.554	3	365.882	1094.62	45247.2	1.7254	0.00063128	-0.71978	-0.00026335	1.0056	0.00036792	365.882	367.223	368.553	17.373	0.27035	17.373	17.258	17.528	0					95	13	11	0	0	0	2.4577e-09
IFSGSSHQDLSQK	13	1	0	Unmodified	_IFSGSSHQDLSQK_			0	0	0	sp|P60891|PRPS1_HUMAN;sp|P21108|PRPS3_HUMAN	sp|P60891|PRPS1_HUMAN	sp|P60891|PRPS1_HUMAN	MULTI-MSMS		16062020_SKO_IP_Cep78	1	exp_1	478.573	3	478.572	1432.69	40252.6	1.5188	0.00072688	-0.030367	-1.4533e-05	1.4885	0.00071234	478.572	479.913	481.244	13.632	0.30257	13.632	13.506	13.809	0					134	17	12	0	0	0	1.2984e-42
IGLGGRGGSGGSYGR	15	0	2	Unmodified	_IGLGGRGGSGGSYGR_			0	0	1	sp|P35527|K1C9_HUMAN;CON__P35527	sp|P35527|K1C9_HUMAN	sp|P35527|K1C9_HUMAN	ISO-MSMS	0	16062020_SKO_IP_Cep78	1	exp_1	450.901	3	450.901	1349.68	NaN	NaN	NaN	-0.19813	-8.9338e-05	NaN	NaN	NaN	NaN	NaN	13.817	0.26894	13.817	13.674	13.943	0								0	0	0	0.0066375
IGRIEDVTPIPSDSTR	16	0	2	Unmodified	_IGRIEDVTPIPSDSTR_			0	0	1	sp|P62263|RS14_HUMAN	sp|P62263|RS14_HUMAN	sp|P62263|RS14_HUMAN	ISO-MSMS	0	16062020_SKO_IP_Cep78	1	exp_1	586.313	3	585.979	1754.92	NaN	NaN	NaN	-1.2072	-0.00070737	NaN	NaN	NaN	NaN	NaN	37.22	0.11877	37.22	37.185	37.304	0								0	0	0	0.0039858
IGVITNRER	9	0	2	Unmodified	_IGVITNRER_			0	0	1	sp|P62701|RS4X_HUMAN	sp|P62701|RS4X_HUMAN	sp|P62701|RS4X_HUMAN	ISO-MSMS	0	16062020_SKO_IP_Cep78	1	exp_1	353.209	3	353.209	1056.6	NaN	NaN	NaN	-0.12662	-4.4722e-05	NaN	NaN	NaN	NaN	NaN	10.989	0.30357	10.989	10.863	11.167	-1.7764e-15								0	0	0	0.0043647
IITHPNFNGNTLDNDIMLIK	20	1	0	Oxidation (M)	_IITHPNFNGNTLDNDIM(ox)LIK_	IITHPNFNGNTLDNDIM(1)LIK	IITHPNFNGNTLDNDIM(58.67)LIK	0	1	0	CON__P00761	CON__P00761	CON__P00761	ISO-MSMS	0	16062020_SKO_IP_Cep78	1	exp_1	767.063	3	767.063	2298.17	NaN	NaN	NaN	0.1833	0.0001406	NaN	NaN	NaN	NaN	NaN	61.596	0.59829	61.596	61.295	61.893	0								0	0	0	0.0002844
ILAHNNFVGR	10	0	1	Unmodified	_ILAHNNFVGR_			0	0	0	sp|Q9NZI8|IF2B1_HUMAN;sp|Q9NZI8-2|IF2B1_HUMAN;sp|O00425|IF2B3_HUMAN	sp|Q9NZI8|IF2B1_HUMAN	sp|Q9NZI8|IF2B1_HUMAN	ISO-MSMS	1	16062020_SKO_IP_Cep78	1	exp_1	382.889	3	380.881	1139.62	NaN	NaN	NaN	5.1512	0.001962	NaN	NaN	NaN	NaN	NaN	17.258	0.26977	17.258	17.14	17.41	0								0	0	0	0.0072863
ILDSVGIEADDDRLNK	16	1	1	Unmodified	_ILDSVGIEADDDRLNK_			0	0	1	sp|P05387|RLA2_HUMAN	sp|P05387|RLA2_HUMAN	sp|P05387|RLA2_HUMAN	ISO-MSMS	2	16062020_SKO_IP_Cep78	1	exp_1	597.649	3	591.639	1771.9	NaN	NaN	NaN	-0.42382	-0.00025075	NaN	NaN	NaN	NaN	NaN	38.542	0.18649	38.542	38.432	38.619	0								0	0	0	0.018649
ILDSVGIEADDDRLNK	16	1	1	Unmodified	_ILDSVGIEADDDRLNK_			0	0	1	sp|P05387|RLA2_HUMAN	sp|P05387|RLA2_HUMAN	sp|P05387|RLA2_HUMAN	ISO-MSMS	0	16062020_SKO_IP_Cep78	1	exp_1	591.973	3	591.639	1771.9	NaN	NaN	NaN	-0.3785	-0.00022394	NaN	NaN	NaN	NaN	NaN	38.556	0.16925	38.556	38.449	38.619	0								0	0	0	0.0049926
ILNEMRDQYEK	11	1	1	Oxidation (M)	_ILNEM(ox)RDQYEK_	ILNEM(1)RDQYEK	ILNEM(48.51)RDQYEK	0	1	1	sp|P02533|K1C14_HUMAN;CON__P02533;sp|Q04695|K1C17_HUMAN;CON__Q04695	sp|P02533|K1C14_HUMAN	sp|P02533|K1C14_HUMAN	ISO-MSMS	0	16062020_SKO_IP_Cep78	1	exp_1	485.904	3	485.57	1453.69	NaN	NaN	NaN	-1.7389	-0.00084438	NaN	NaN	NaN	NaN	NaN	12.813	0.20255	12.813	12.732	12.934	0								0	0	0	0.024443
ILQDSLGGRTR	11	0	2	Unmodified	_ILQDSLGGRTR_			0	0	1	sp|P52732|KIF11_HUMAN	sp|P52732|KIF11_HUMAN	sp|P52732|KIF11_HUMAN	MSMS	0	16062020_SKO_IP_Cep78	1	exp_1	405.899	3	405.898	1214.67	NaN	NaN	NaN	NaN	NaN	NaN	NaN	NaN	NaN	NaN	15.879	1	15.879	15.379	16.379	0								0	0	0	0.00015083
INAVVETGRR	10	0	2	Unmodified	_INAVVETGRR_			0	0	1	sp|Q01082|SPTB2_HUMAN;sp|Q01082-2|SPTB2_HUMAN;sp|Q01082-3|SPTB2_HUMAN	sp|Q01082|SPTB2_HUMAN	sp|Q01082|SPTB2_HUMAN	ISO-MSMS	0	16062020_SKO_IP_Cep78	1	exp_1	372.216	3	372.216	1113.63	NaN	NaN	NaN	-0.10628	-3.9558e-05	NaN	NaN	NaN	NaN	NaN	10.6	0.16925	10.6	10.526	10.695	1.7764e-15								0	0	0	0.015199
IPVRHLYTK	9	1	1	Unmodified	_IPVRHLYTK_			0	0	1	sp|Q00839-2|HNRPU_HUMAN;sp|Q00839|HNRPU_HUMAN	sp|Q00839-2|HNRPU_HUMAN	sp|Q00839-2|HNRPU_HUMAN	MULTI-MSMS		16062020_SKO_IP_Cep78	1	exp_1	376.229	3	376.229	1125.67	44619.3	0.26642	0.00010024	-0.51999	-0.00019563	-0.25357	-9.5399e-05	376.229	379.578	382.236	9.6304	0.37059	9.6304	9.5325	9.9031	0					67	21	9	0	0	0	3.7308e-09
IRFQESEERPK	11	1	2	Unmodified	_IRFQESEERPK_			0	0	2	sp|P34932|HSP74_HUMAN	sp|P34932|HSP74_HUMAN	sp|P34932|HSP74_HUMAN	MSMS	0	16062020_SKO_IP_Cep78	1	exp_1	473.586	3	473.584	1417.73	NaN	NaN	NaN	NaN	NaN	NaN	NaN	NaN	NaN	NaN	11.598	1	11.598	11.098	12.098	0								0	0	0	0.0015455
IRLVEDKPGSR	11	1	2	Unmodified	_IRLVEDKPGSR_			0	0	2	sp|Q08170|SRSF4_HUMAN	sp|Q08170|SRSF4_HUMAN	sp|Q08170|SRSF4_HUMAN	ISO-MSMS	0	16062020_SKO_IP_Cep78	1	exp_1	423.915	3	423.914	1268.72	NaN	NaN	NaN	0.21587	9.1509e-05	NaN	NaN	NaN	NaN	NaN	12.235	0.18597	12.235	12.125	12.311	0								0	0	0	0.0021596
IVTDRETGSSK	11	1	1	Unmodified	_IVTDRETGSSK_			0	0	1	sp|P19338|NUCL_HUMAN	sp|P19338|NUCL_HUMAN	sp|P19338|NUCL_HUMAN	ISO-MSMS	0	16062020_SKO_IP_Cep78	1	exp_1	398.212	3	398.21	1191.61	NaN	NaN	NaN	3.2722	0.001303	NaN	NaN	NaN	NaN	NaN	5.9243	0.067048	5.9243	5.8824	5.9494	0								0	0	0	0.0055932
KAVDQHNAEAQDIFGK	16	2	0	Unmodified	_KAVDQHNAEAQDIFGK_			0	0	1	sp|P52732|KIF11_HUMAN	sp|P52732|KIF11_HUMAN	sp|P52732|KIF11_HUMAN	ISO-MSMS	0	16062020_SKO_IP_Cep78	1	exp_1	591.298	3	590.964	1769.87	NaN	NaN	NaN	0.87054	0.00051446	NaN	NaN	NaN	NaN	NaN	19.027	0.10078	19.027	18.993	19.094	-3.5527e-15								0	0	0	0.012972
KDTGHIYAMK	10	2	0	Oxidation (M)	_KDTGHIYAM(ox)K_	KDTGHIYAM(1)K	KDTGHIYAM(72.19)K	0	1	1	sp|Q9Y2H1|ST38L_HUMAN;sp|Q9Y2H1-2|ST38L_HUMAN	sp|Q9Y2H1|ST38L_HUMAN	sp|Q9Y2H1|ST38L_HUMAN	ISO-MSMS	0	16062020_SKO_IP_Cep78	1	exp_1	394.199	3	393.866	1178.58	NaN	NaN	NaN	0.66928	0.00026361	NaN	NaN	NaN	NaN	NaN	1.199	0.23497	1.199	1.0347	1.2696	0								0	0	0	0.0034453
KPQLTQEELEAK	12	2	0	Unmodified	_KPQLTQEELEAK_			0	0	1	sp|Q12872|SFSWA_HUMAN;sp|Q12872-2|SFSWA_HUMAN	sp|Q12872|SFSWA_HUMAN	sp|Q12872|SFSWA_HUMAN	MSMS	0	16062020_SKO_IP_Cep78	1	exp_1	471.923	3	471.924	1412.75	NaN	NaN	NaN	NaN	NaN	NaN	NaN	NaN	NaN	NaN	16.334	1	16.334	15.834	16.834	0								0	0	0	0.0079014
KRVLLGETGK	10	2	1	Unmodified	_KRVLLGETGK_			0	0	2	sp|P62280|RS11_HUMAN	sp|P62280|RS11_HUMAN	sp|P62280|RS11_HUMAN	ISO-MSMS	0	16062020_SKO_IP_Cep78	1	exp_1	367.564	3	367.564	1099.67	NaN	NaN	NaN	-0.49905	-0.00018343	NaN	NaN	NaN	NaN	NaN	6.4532	0.16759	6.4532	6.3684	6.536	0								0	0	0	0.00064311
LDIPTGTTPQRK	12	1	1	Unmodified	_LDIPTGTTPQRK_			0	0	1	sp|P52732|KIF11_HUMAN	sp|P52732|KIF11_HUMAN	sp|P52732|KIF11_HUMAN	MSMS	2	16062020_SKO_IP_Cep78	1	exp_1	448.926	3	442.917	1325.73	NaN	NaN	NaN	NaN	NaN	NaN	NaN	NaN	NaN	NaN	20.356	1	20.356	19.856	20.856	0								0	0	0	0.015454
LDPHNHVLYSNR	12	0	1	Unmodified	_LDPHNHVLYSNR_			0	0	0	sp|P31948-3|STIP1_HUMAN;sp|P31948|STIP1_HUMAN;sp|P31948-2|STIP1_HUMAN	sp|P31948-3|STIP1_HUMAN	sp|P31948-3|STIP1_HUMAN	ISO-MSMS	0	16062020_SKO_IP_Cep78	1	exp_1	488.917	3	488.916	1463.73	NaN	NaN	NaN	-0.47586	-0.00023266	NaN	NaN	NaN	NaN	NaN	14.391	0.16766	14.391	14.295	14.463	0								0	0	0	0.00027524
LDRLAYIAHPK	11	1	1	Unmodified	_LDRLAYIAHPK_			0	0	1	sp|P47914|RL29_HUMAN	sp|P47914|RL29_HUMAN	sp|P47914|RL29_HUMAN	ISO-MSMS	2	16062020_SKO_IP_Cep78	1	exp_1	439.26	3	432.919	1295.74	NaN	NaN	NaN	0.17601	7.62e-05	NaN	NaN	NaN	NaN	NaN	19.42	0.30319	19.42	19.278	19.582	3.5527e-15								0	0	0	0.013697
LDRLAYIAHPK	11	1	1	Unmodified	_LDRLAYIAHPK_			0	0	1	sp|P47914|RL29_HUMAN	sp|P47914|RL29_HUMAN	sp|P47914|RL29_HUMAN	ISO-MSMS	0	16062020_SKO_IP_Cep78	1	exp_1	432.919	3	432.919	1295.74	NaN	NaN	NaN	0.24456	0.00010588	NaN	NaN	NaN	NaN	NaN	19.431	0.26959	19.431	19.295	19.565	3.5527e-15								0	0	0	0.0078403
LEQELTEGREK	11	1	1	Unmodified	_LEQELTEGREK_			0	0	1	sp|Q12899|TRI26_HUMAN	sp|Q12899|TRI26_HUMAN	sp|Q12899|TRI26_HUMAN	ISO-MSMS	0	16062020_SKO_IP_Cep78	1	exp_1	444.899	3	444.565	1330.67	NaN	NaN	NaN	-0.21707	-9.65e-05	NaN	NaN	NaN	NaN	NaN	12.732	0.15256	12.732	12.664	12.816	0								0	0	0	0.0078549
LERELESLR	9	0	2	Unmodified	_LERELESLR_			0	0	1	sp|Q4VCS5-2|AMOT_HUMAN;sp|Q4VCS5|AMOT_HUMAN	sp|Q4VCS5-2|AMOT_HUMAN	sp|Q4VCS5-2|AMOT_HUMAN	ISO-MSMS	1	16062020_SKO_IP_Cep78	1	exp_1	386.23	3	382.216	1143.62	NaN	NaN	NaN	-0.70124	-0.00026803	NaN	NaN	NaN	NaN	NaN	20.703	0.20146	20.703	20.594	20.795	0								0	0	0	4.4931e-12
LERELESLR	9	0	2	Unmodified	_LERELESLR_			0	0	1	sp|Q4VCS5-2|AMOT_HUMAN;sp|Q4VCS5|AMOT_HUMAN	sp|Q4VCS5-2|AMOT_HUMAN	sp|Q4VCS5-2|AMOT_HUMAN	ISO-MSMS	0	16062020_SKO_IP_Cep78	1	exp_1	382.216	3	382.216	1143.62	NaN	NaN	NaN	-0.35464	-0.00013555	NaN	NaN	NaN	NaN	NaN	20.703	0.16789	20.703	20.611	20.778	0								0	0	0	4.4931e-12
LFDSTTLEHQK	11	1	0	Unmodified	_LFDSTTLEHQK_			0	0	0	sp|Q13347|EIF3I_HUMAN	sp|Q13347|EIF3I_HUMAN	sp|Q13347|EIF3I_HUMAN	ISO-MSMS	0	16062020_SKO_IP_Cep78	1	exp_1	440.227	3	440.226	1317.66	NaN	NaN	NaN	-0.95961	-0.00042244	NaN	NaN	NaN	NaN	NaN	24.597	0.23716	24.597	24.5	24.737	0								0	0	0	0.0059211
LGEHNIDVLEGNEQFINAAK	20	1	0	Unmodified	_LGEHNIDVLEGNEQFINAAK_			0	0	0	CON__P00761	CON__P00761	CON__P00761	ISO-MSMS	0	16062020_SKO_IP_Cep78	1	exp_1	738.041	3	737.706	2210.1	NaN	NaN	NaN	0.54552	0.00040243	NaN	NaN	NaN	NaN	NaN	54.907	0.53756	54.907	54.712	55.249	0								0	0	0	0.026752
LGIHEDSTNR	10	0	1	Unmodified	_LGIHEDSTNR_			0	0	0	sp|P08238|HS90B_HUMAN	sp|P08238|HS90B_HUMAN	sp|P08238|HS90B_HUMAN	ISO-MSMS	0	16062020_SKO_IP_Cep78	1	exp_1	381.526	3	381.191	1140.55	NaN	NaN	NaN	-0.56675	-0.00021604	NaN	NaN	NaN	NaN	NaN	9.1662	0.21656	9.1662	9.0845	9.3011	0								0	0	0	0.0047945
LGNDFHTNK	9	1	0	Unmodified	_LGNDFHTNK_			0	0	0	sp|P08708|RS17_HUMAN	sp|P08708|RS17_HUMAN	sp|P08708|RS17_HUMAN	MSMS	2	16062020_SKO_IP_Cep78	1	exp_1	352.18	3	349.174	1044.5	NaN	NaN	NaN	NaN	NaN	NaN	NaN	NaN	NaN	NaN	7.7508	1	7.7508	7.2508	8.2508	0								0	0	0	0.00091828
LHGELQDRK	9	1	1	Unmodified	_LHGELQDRK_			0	0	1	sp|Q9NR30-2|DDX21_HUMAN;sp|Q9NR30|DDX21_HUMAN	sp|Q9NR30-2|DDX21_HUMAN	sp|Q9NR30-2|DDX21_HUMAN	ISO-MSMS	2	16062020_SKO_IP_Cep78	1	exp_1	371.876	3	365.868	1094.58	NaN	NaN	NaN	0.16979	6.2123e-05	NaN	NaN	NaN	NaN	NaN	1.2554	0.21825	1.2554	1.1353	1.3536	0								0	0	0	0.011456
LIDVNHYAK	9	1	0	Unmodified	_LIDVNHYAK_			0	0	0	sp|Q13813-3|SPTN1_HUMAN;sp|Q13813|SPTN1_HUMAN;sp|Q13813-2|SPTN1_HUMAN	sp|Q13813-3|SPTN1_HUMAN	sp|Q13813-3|SPTN1_HUMAN	ISO-MSMS	0	16062020_SKO_IP_Cep78	1	exp_1	358.2	3	358.198	1071.57	NaN	NaN	NaN	0.98425	0.00035256	NaN	NaN	NaN	NaN	NaN	19.61	0.27028	19.61	19.498	19.768	0								0	0	0	0.016819
LIEVDDERK	9	1	1	Unmodified	_LIEVDDERK_			0	0	1	sp|P62753|RS6_HUMAN	sp|P62753|RS6_HUMAN	sp|P62753|RS6_HUMAN	ISO-MSMS	0	16062020_SKO_IP_Cep78	1	exp_1	372.868	3	372.868	1115.58	NaN	NaN	NaN	0.10706	3.992e-05	NaN	NaN	NaN	NaN	NaN	14.422	0.28504	14.422	14.228	14.513	0								0	0	0	0.0032785
LLADQAEARR	10	0	2	Unmodified	_LLADQAEARR_			0	0	1	sp|P84098|RL19_HUMAN	sp|P84098|RL19_HUMAN	sp|P84098|RL19_HUMAN	MULTI-MSMS		16062020_SKO_IP_Cep78	1	exp_1	388.22	3	381.547	1141.62	44676	1.1306	0.00043137	-0.6549	-0.00024987	0.47567	0.00018149	381.547	385.561	388.219	12.435	0.30255	12.435	12.277	12.58	0					84	17	8	0	0	0	5.8908e-21
LLEVEHPAAK	10	1	0	Unmodified	_LLEVEHPAAK_			0	0	0	sp|P17987|TCPA_HUMAN	sp|P17987|TCPA_HUMAN	sp|P17987|TCPA_HUMAN	ISO-MSMS	0	16062020_SKO_IP_Cep78	1	exp_1	369.546	3	369.545	1105.61	NaN	NaN	NaN	0.81903	0.00030267	NaN	NaN	NaN	NaN	NaN	16.165	0.26929	16.165	15.995	16.264	0								0	0	0	0.0087387
LLTQHENIK	9	1	0	Unmodified	_LLTQHENIK_			0	0	0	sp|Q01082|SPTB2_HUMAN;sp|Q01082-2|SPTB2_HUMAN;sp|Q01082-3|SPTB2_HUMAN	sp|Q01082|SPTB2_HUMAN	sp|Q01082|SPTB2_HUMAN	ISO-MSMS	0	16062020_SKO_IP_Cep78	1	exp_1	365.877	3	365.877	1094.61	NaN	NaN	NaN	-0.16329	-5.9743e-05	NaN	NaN	NaN	NaN	NaN	10.556	0.2363	10.556	10.391	10.627	0								0	0	0	0.0044007
LLTQHENIK	9	1	0	Unmodified	_LLTQHENIK_			0	0	0	sp|Q01082|SPTB2_HUMAN;sp|Q01082-2|SPTB2_HUMAN;sp|Q01082-3|SPTB2_HUMAN	sp|Q01082|SPTB2_HUMAN	sp|Q01082|SPTB2_HUMAN	ISO-MSMS	2	16062020_SKO_IP_Cep78	1	exp_1	368.548	3	365.877	1094.61	NaN	NaN	NaN	0.22715	8.3107e-05	NaN	NaN	NaN	NaN	NaN	10.539	0.33769	10.539	10.374	10.712	1.7764e-15								0	0	0	0.0034876
LMELHGEGSSSGK	13	1	0	Oxidation (M)	_LM(ox)ELHGEGSSSGK_	LM(1)ELHGEGSSSGK	LM(95.43)ELHGEGSSSGK	0	1	0	sp|P61247|RS3A_HUMAN	sp|P61247|RS3A_HUMAN	sp|P61247|RS3A_HUMAN	ISO-MSMS	0	16062020_SKO_IP_Cep78	1	exp_1	449.878	3	449.878	1346.61	NaN	NaN	NaN	0.45605	0.00020517	NaN	NaN	NaN	NaN	NaN	6.8446	0.28305	6.8446	6.6705	6.9535	0								0	0	0	0.000259
LNGHQLENHALK	12	1	0	Unmodified	_LNGHQLENHALK_			0	0	0	sp|Q9NZI8|IF2B1_HUMAN	sp|Q9NZI8|IF2B1_HUMAN	sp|Q9NZI8|IF2B1_HUMAN	ISO-MSMS	2	16062020_SKO_IP_Cep78	1	exp_1	461.252	3	458.581	1372.72	NaN	NaN	NaN	0.15763	7.2285e-05	NaN	NaN	NaN	NaN	NaN	11.653	0.30309	11.653	11.535	11.838	0								0	0	0	9.4347e-05
LNGHQLENHALK	12	1	0	Unmodified	_LNGHQLENHALK_			0	0	0	sp|Q9NZI8|IF2B1_HUMAN	sp|Q9NZI8|IF2B1_HUMAN	sp|Q9NZI8|IF2B1_HUMAN	ISO-MSMS	0	16062020_SKO_IP_Cep78	1	exp_1	458.583	3	458.581	1372.72	NaN	NaN	NaN	0.59726	0.00027389	NaN	NaN	NaN	NaN	NaN	11.719	0.37094	11.719	11.552	11.923	0								0	0	0	0.0069044
LNGHQLENHALK	12	1	0	Unmodified	_LNGHQLENHALK_			0	0	0	sp|Q9NZI8|IF2B1_HUMAN	sp|Q9NZI8|IF2B1_HUMAN	sp|Q9NZI8|IF2B1_HUMAN	MSMS	1	16062020_SKO_IP_Cep78	1	exp_1	460.257	3	458.581	1372.72	NaN	NaN	NaN	NaN	NaN	NaN	NaN	NaN	NaN	NaN	11.643	1	11.643	11.143	12.143	0								0	0	0	0.022104
LNPHRESDGASDEAEESGSQGK	22	1	1	Unmodified	_LNPHRESDGASDEAEESGSQGK_			0	0	1	sp|O75688|PPM1B_HUMAN;sp|O75688-3|PPM1B_HUMAN	sp|O75688|PPM1B_HUMAN	sp|O75688|PPM1B_HUMAN	ISO-MSMS	0	16062020_SKO_IP_Cep78	1	exp_1	767.674	3	767.339	2298.99	NaN	NaN	NaN	0.20171	0.00015478	NaN	NaN	NaN	NaN	NaN	6.8659	0.18441	6.8659	6.7691	6.9535	-8.8818e-16								0	0	0	2.2895e-202
LPREPSNPER	10	0	2	Unmodified	_LPREPSNPER_			0	0	1	sp|P23588|IF4B_HUMAN	sp|P23588|IF4B_HUMAN	sp|P23588|IF4B_HUMAN	ISO-MSMS	0	16062020_SKO_IP_Cep78	1	exp_1	398.88	3	398.879	1193.62	NaN	NaN	NaN	0.71281	0.00028433	NaN	NaN	NaN	NaN	NaN	10.054	1.0445	10.054	9.6333	10.678	0								0	0	0	0.027459
LPREPSNPERLK	12	1	2	Unmodified	_LPREPSNPERLK_			0	0	2	sp|P23588|IF4B_HUMAN	sp|P23588|IF4B_HUMAN	sp|P23588|IF4B_HUMAN	ISO-MSMS	0	16062020_SKO_IP_Cep78	1	exp_1	479.606	3	479.272	1434.79	NaN	NaN	NaN	-0.021391	-1.0252e-05	NaN	NaN	NaN	NaN	NaN	13.985	0.50349	13.985	13.708	14.211	0								0	0	0	0.0017429
LRAVDFAER	9	0	2	Unmodified	_LRAVDFAER_			0	0	1	sp|P62917|RL8_HUMAN	sp|P62917|RL8_HUMAN	sp|P62917|RL8_HUMAN	ISO-MSMS	0	16062020_SKO_IP_Cep78	1	exp_1	359.868	3	359.533	1075.58	NaN	NaN	NaN	-0.23382	-8.4066e-05	NaN	NaN	NaN	NaN	NaN	21.425	0.26477	21.425	21.355	21.62	0								0	0	0	0.0073762
LRAVDFAER	9	0	2	Unmodified	_LRAVDFAER_			0	0	1	sp|P62917|RL8_HUMAN	sp|P62917|RL8_HUMAN	sp|P62917|RL8_HUMAN	ISO-MSMS	2	16062020_SKO_IP_Cep78	1	exp_1	366.539	3	359.533	1075.58	NaN	NaN	NaN	-0.67014	-0.00024094	NaN	NaN	NaN	NaN	NaN	21.447	0.26082	21.447	21.319	21.58	0								0	0	0	0.0032564
LREDLERLK	9	1	2	Unmodified	_LREDLERLK_			0	0	2	sp|P62269|RS18_HUMAN	sp|P62269|RS18_HUMAN	sp|P62269|RS18_HUMAN	ISO-MSMS	0	16062020_SKO_IP_Cep78	1	exp_1	391.232	3	391.231	1170.67	NaN	NaN	NaN	-0.24268	-9.4944e-05	NaN	NaN	NaN	NaN	NaN	16.268	0.1678	16.268	16.163	16.331	-3.5527e-15								0	0	0	8.1298e-11
LREDLERLK	9	1	2	Unmodified	_LREDLERLK_			0	0	2	sp|P62269|RS18_HUMAN	sp|P62269|RS18_HUMAN	sp|P62269|RS18_HUMAN	ISO-MSMS	2	16062020_SKO_IP_Cep78	1	exp_1	400.575	3	391.231	1170.67	NaN	NaN	NaN	-0.54059	-0.00021149	NaN	NaN	NaN	NaN	NaN	16.266	0.13423	16.266	16.18	16.314	0								0	0	0	0.018856
LRPEREPR	8	0	3	Unmodified	_LRPEREPR_			0	0	2	sp|Q13263-2|TIF1B_HUMAN;sp|Q13263|TIF1B_HUMAN	sp|Q13263-2|TIF1B_HUMAN	sp|Q13263-2|TIF1B_HUMAN	ISO-MSMS	0	16062020_SKO_IP_Cep78	1	exp_1	351.537	3	351.537	1051.59	NaN	NaN	NaN	-0.29995	-0.00010544	NaN	NaN	NaN	NaN	NaN	5.8572	0.11814	5.8572	5.8145	5.9327	0								0	0	0	0.019772
LRSEIDNVKK	10	2	1	Unmodified	_LRSEIDNVKK_			0	0	2	CON__Q5XQN5;CON__Q922U2;sp|P04264|K2C1_HUMAN;CON__P04264	CON__Q5XQN5;sp|P04264|K2C1_HUMAN	sp|P04264|K2C1_HUMAN	ISO-MSMS	0	16062020_SKO_IP_Cep78	1	exp_1	401.235	3	401.235	1200.68	NaN	NaN	NaN	1.6933	0.00067942	NaN	NaN	NaN	NaN	NaN	7.1525	0.13855	7.1525	7.0718	7.2103	0								0	0	0	0.01389
LTIAEERDK	9	1	1	Unmodified	_LTIAEERDK_			0	0	1	sp|P62701|RS4X_HUMAN;sp|Q8TD47|RS4Y2_HUMAN	sp|P62701|RS4X_HUMAN	sp|P62701|RS4X_HUMAN	ISO-MSMS	0	16062020_SKO_IP_Cep78	1	exp_1	358.863	3	358.865	1073.57	NaN	NaN	NaN	0.82104	0.00029464	NaN	NaN	NaN	NaN	NaN	11.397	0.33201	11.397	11.237	11.569	1.7764e-15								0	0	0	0.0016062
LTIAEERDK	9	1	1	Unmodified	_LTIAEERDK_			0	0	1	sp|P62701|RS4X_HUMAN;sp|Q8TD47|RS4Y2_HUMAN	sp|P62701|RS4X_HUMAN	sp|P62701|RS4X_HUMAN	ISO-MSMS	2	16062020_SKO_IP_Cep78	1	exp_1	365.187	3	358.865	1073.57	NaN	NaN	NaN	-0.028409	-1.0195e-05	NaN	NaN	NaN	NaN	NaN	11.378	0.31466	11.378	11.221	11.535	0								0	0	0	0.006655
LTPQGQRDLDR	11	0	2	Unmodified	_LTPQGQRDLDR_			0	0	1	sp|P39019|RS19_HUMAN	sp|P39019|RS19_HUMAN	sp|P39019|RS19_HUMAN	ISO-MSMS	0	16062020_SKO_IP_Cep78	1	exp_1	433.566	3	433.565	1297.67	NaN	NaN	NaN	0.066884	2.8999e-05	NaN	NaN	NaN	NaN	NaN	9.7918	0.15167	9.7918	9.7011	9.8528	0								0	0	0	0.0074258
LVNHFVEEFK	10	1	0	Unmodified	_LVNHFVEEFK_			0	0	0	sp|P0DMV9|HS71B_HUMAN;sp|P0DMV8|HS71A_HUMAN;sp|P0DMV8-2|HS71A_HUMAN	sp|P0DMV9|HS71B_HUMAN	sp|P0DMV9|HS71B_HUMAN	ISO-MSMS	2	16062020_SKO_IP_Cep78	1	exp_1	423.896	3	421.224	1260.65	NaN	NaN	NaN	-1.2016	-0.00050616	NaN	NaN	NaN	NaN	NaN	34.568	0.15221	34.568	34.468	34.62	7.1054e-15								0	0	0	0.023893
MHDFNRDLR	9	0	2	Oxidation (M)	_M(ox)HDFNRDLR_	M(1)HDFNRDLR	M(51.27)HDFNRDLR	0	1	1	sp|Q4VCS5-2|AMOT_HUMAN;sp|Q4VCS5|AMOT_HUMAN	sp|Q4VCS5-2|AMOT_HUMAN	sp|Q4VCS5-2|AMOT_HUMAN	ISO-MSMS	1	16062020_SKO_IP_Cep78	1	exp_1	411.205	3	407.193	1218.56	NaN	NaN	NaN	-0.74639	-0.00030392	NaN	NaN	NaN	NaN	NaN	9.872	0.30268	9.872	9.7011	10.004	0								0	0	0	0.02775
MHDFNRDLRER	11	0	3	Oxidation (M)	_M(ox)HDFNRDLRER_	M(1)HDFNRDLRER	M(113.22)HDFNRDLRER	0	1	2	sp|Q4VCS5-2|AMOT_HUMAN;sp|Q4VCS5|AMOT_HUMAN	sp|Q4VCS5-2|AMOT_HUMAN	sp|Q4VCS5-2|AMOT_HUMAN	ISO-MSMS	1	16062020_SKO_IP_Cep78	1	exp_1	508.595	3	502.241	1503.7	NaN	NaN	NaN	-1.1982	-0.00060179	NaN	NaN	NaN	NaN	NaN	10.42	0.50517	10.42	10.037	10.542	0								0	0	0	0.0008748
MHDFNRDLRER	11	0	3	Oxidation (M)	_M(ox)HDFNRDLRER_	M(1)HDFNRDLRER	M(51.01)HDFNRDLRER	0	1	2	sp|Q4VCS5-2|AMOT_HUMAN;sp|Q4VCS5|AMOT_HUMAN	sp|Q4VCS5-2|AMOT_HUMAN	sp|Q4VCS5-2|AMOT_HUMAN	ISO-MSMS	0	16062020_SKO_IP_Cep78	1	exp_1	502.239	3	502.241	1503.7	NaN	NaN	NaN	-1.254	-0.00062981	NaN	NaN	NaN	NaN	NaN	10.424	0.25233	10.424	10.29	10.542	0								0	0	0	0.024302
MIASDSHRPEVK	12	1	1	Oxidation (M)	_M(ox)IASDSHRPEVK_	M(1)IASDSHRPEVK	M(110.08)IASDSHRPEVK	0	1	1	sp|Q9NYF8-3|BCLF1_HUMAN;sp|Q9NYF8-2|BCLF1_HUMAN;sp|Q9NYF8|BCLF1_HUMAN;sp|Q9NYF8-4|BCLF1_HUMAN	sp|Q9NYF8-3|BCLF1_HUMAN	sp|Q9NYF8-3|BCLF1_HUMAN	ISO-MSMS	0	16062020_SKO_IP_Cep78	1	exp_1	462.567	3	462.566	1384.68	NaN	NaN	NaN	-0.20267	-9.375e-05	NaN	NaN	NaN	NaN	NaN	6.3444	0.20101	6.3444	6.2176	6.4186	0								0	0	0	0.00024397
MIASDSHRPEVK	12	1	1	Oxidation (M)	_M(ox)IASDSHRPEVK_	M(1)IASDSHRPEVK	M(85.52)IASDSHRPEVK	0	1	1	sp|Q9NYF8-3|BCLF1_HUMAN;sp|Q9NYF8-2|BCLF1_HUMAN;sp|Q9NYF8|BCLF1_HUMAN;sp|Q9NYF8-4|BCLF1_HUMAN	sp|Q9NYF8-3|BCLF1_HUMAN	sp|Q9NYF8-3|BCLF1_HUMAN	ISO-MSMS	2	16062020_SKO_IP_Cep78	1	exp_1	468.574	3	462.566	1384.68	NaN	NaN	NaN	0.00092005	4.2558e-07	NaN	NaN	NaN	NaN	NaN	6.3486	0.21777	6.3486	6.2009	6.4186	0								0	0	0	0.0043227
MLQHIDYR	8	0	1	Oxidation (M)	_M(ox)LQHIDYR_	M(1)LQHIDYR	M(72.23)LQHIDYR	0	1	0	sp|P14678-2|RSMB_HUMAN;sp|P63162|RSMN_HUMAN;sp|P14678|RSMB_HUMAN;sp|P63162-2|RSMN_HUMAN;sp|P14678-3|RSMB_HUMAN	sp|P14678-2|RSMB_HUMAN	sp|P14678-2|RSMB_HUMAN	ISO-MSMS	0	16062020_SKO_IP_Cep78	1	exp_1	364.515	3	364.515	1090.52	NaN	NaN	NaN	-1.1424	-0.00041642	NaN	NaN	NaN	NaN	NaN	14.325	0.30182	14.325	14.211	14.513	0								0	0	0	0.014453
NGMVLKPHFHK	11	2	0	Oxidation (M)	_NGM(ox)VLKPHFHK_	NGM(1)VLKPHFHK	NGM(48.19)VLKPHFHK	0	1	1	sp|P26373|RL13_HUMAN;sp|P26373-2|RL13_HUMAN	sp|P26373|RL13_HUMAN	sp|P26373|RL13_HUMAN	ISO-MSMS	0	16062020_SKO_IP_Cep78	1	exp_1	441.905	3	441.905	1322.69	NaN	NaN	NaN	3.3231	0.0014685	NaN	NaN	NaN	NaN	NaN	6.8364	0.20009	6.8364	6.7032	6.9033	0								0	0	0	0.024859
NGYGFINRNDTK	12	1	1	Unmodified	_NGYGFINRNDTK_			0	0	1	sp|P16989-2|YBOX3_HUMAN;sp|P16989-3|YBOX3_HUMAN;sp|P16989|YBOX3_HUMAN;sp|Q9Y2T7|YBOX2_HUMAN;sp|P67809|YBOX1_HUMAN	sp|P16989-2|YBOX3_HUMAN;sp|P67809|YBOX1_HUMAN	sp|P67809|YBOX1_HUMAN	ISO-MSMS	2	16062020_SKO_IP_Cep78	1	exp_1	472.905	3	466.897	1397.67	NaN	NaN	NaN	-0.85586	-0.0003996	NaN	NaN	NaN	NaN	NaN	17.809	0.20141	17.809	17.713	17.915	0								0	0	0	0.0018118
NGYGFINRNDTK	12	1	1	Unmodified	_NGYGFINRNDTK_			0	0	1	sp|P16989-2|YBOX3_HUMAN;sp|P16989-3|YBOX3_HUMAN;sp|P16989|YBOX3_HUMAN;sp|Q9Y2T7|YBOX2_HUMAN;sp|P67809|YBOX1_HUMAN	sp|P16989-2|YBOX3_HUMAN;sp|P67809|YBOX1_HUMAN	sp|P67809|YBOX1_HUMAN	ISO-MSMS	0	16062020_SKO_IP_Cep78	1	exp_1	466.897	3	466.897	1397.67	NaN	NaN	NaN	-0.85581	-0.00039957	NaN	NaN	NaN	NaN	NaN	17.811	0.21821	17.811	17.713	17.932	0								0	0	0	0.00023208
NILNKPEVNQK	11	2	0	Unmodified	_NILNKPEVNQK_			0	0	1	sp|P52732|KIF11_HUMAN	sp|P52732|KIF11_HUMAN	sp|P52732|KIF11_HUMAN	ISO-MSMS	0	16062020_SKO_IP_Cep78	1	exp_1	432.914	3	432.914	1295.72	NaN	NaN	NaN	-0.12616	-5.4616e-05	NaN	NaN	NaN	NaN	NaN	14.507	0.40132	14.507	14.346	14.747	-1.7764e-15								0	0	0	0.0009631
NKYEDEINKR	10	2	1	Unmodified	_NKYEDEINKR_			0	0	2	CON__Q5XQN5;CON__Q922U2;sp|P05787|K2C8_HUMAN;CON__P05787;sp|P05787-2|K2C8_HUMAN;CON__Q8VED5;CON__H-INV:HIT000016045;sp|P04264|K2C1_HUMAN;CON__P04264;CON__Q6IFZ6;sp|P13647|K2C5_HUMAN;CON__P13647	CON__Q5XQN5;sp|P04264|K2C1_HUMAN;sp|P13647|K2C5_HUMAN	sp|P04264|K2C1_HUMAN	ISO-MSMS	0	16062020_SKO_IP_Cep78	1	exp_1	436.89	3	436.89	1307.65	NaN	NaN	NaN	0.44834	0.00019588	NaN	NaN	NaN	NaN	NaN	10.053	0.18524	10.053	9.9535	10.139	0								0	0	0	2.4058e-50
NLDDGIDDERLRK	13	1	2	Unmodified	_NLDDGIDDERLRK_			0	0	2	sp|P11940-2|PABP1_HUMAN;sp|P11940|PABP1_HUMAN;sp|Q9H361|PABP3_HUMAN	sp|P11940-2|PABP1_HUMAN	sp|P11940-2|PABP1_HUMAN	ISO-MSMS	0	16062020_SKO_IP_Cep78	1	exp_1	520.601	3	520.266	1557.77	NaN	NaN	NaN	0.10874	5.6572e-05	NaN	NaN	NaN	NaN	NaN	19.862	0.20182	19.862	19.751	19.953	0								0	0	0	0.0016697
NSFQPISSLRDDER	14	0	2	Unmodified	_NSFQPISSLRDDER_			0	0	1	sp|P98175-2|RBM10_HUMAN;sp|P98175|RBM10_HUMAN;sp|P98175-4|RBM10_HUMAN;sp|P98175-3|RBM10_HUMAN	sp|P98175-2|RBM10_HUMAN	sp|P98175-2|RBM10_HUMAN	ISO-MSMS	0	16062020_SKO_IP_Cep78	1	exp_1	555.609	3	555.273	1662.8	NaN	NaN	NaN	2.7994	0.0015544	NaN	NaN	NaN	NaN	NaN	32.331	0.22168	32.331	32.237	32.459	0								0	0	0	0.010914
NSFRYNGLIHRK	12	1	2	Unmodified	_NSFRYNGLIHRK_			0	0	2	sp|P46779|RL28_HUMAN;sp|P46779-2|RL28_HUMAN;sp|P46779-3|RL28_HUMAN;sp|P46779-4|RL28_HUMAN;sp|P46779-5|RL28_HUMAN	sp|P46779|RL28_HUMAN	sp|P46779|RL28_HUMAN	ISO-MSMS	0	16062020_SKO_IP_Cep78	1	exp_1	502.61	3	502.276	1503.81	NaN	NaN	NaN	-2.346	-0.0011784	NaN	NaN	NaN	NaN	NaN	14.547	0.10058	14.547	14.497	14.597	0								0	0	0	0.0036468
PFFHSLSEK	9	1	0	Unmodified	_PFFHSLSEK_			0	0	0	sp|P10599|THIO_HUMAN	sp|P10599|THIO_HUMAN	sp|P10599|THIO_HUMAN	ISO-MSMS	0	16062020_SKO_IP_Cep78	1	exp_1	364.523	3	364.522	1090.54	NaN	NaN	NaN	0.72553	0.00026447	NaN	NaN	NaN	NaN	NaN	23.386	0.43878	23.386	23.197	23.636	0								0	0	0	0.0021508
PFFHSLSEK	9	1	0	Unmodified	_PFFHSLSEK_			0	0	0	sp|P10599|THIO_HUMAN	sp|P10599|THIO_HUMAN	sp|P10599|THIO_HUMAN	ISO-MSMS	2	16062020_SKO_IP_Cep78	1	exp_1	367.194	3	364.522	1090.54	NaN	NaN	NaN	2.5284	0.00092165	NaN	NaN	NaN	NaN	NaN	23.363	0.96151	23.363	23.115	24.076	-3.5527e-15								0	0	0	0.0022222
PFFHSLSEK	9	1	0	Unmodified	_PFFHSLSEK_			0	0	0	sp|P10599|THIO_HUMAN	sp|P10599|THIO_HUMAN	sp|P10599|THIO_HUMAN	ISO-MSMS	1	16062020_SKO_IP_Cep78	1	exp_1	365.864	3	364.522	1090.54	NaN	NaN	NaN	0.23152	8.4394e-05	NaN	NaN	NaN	NaN	NaN	23.312	0.32061	23.312	23.197	23.518	0								0	0	0	0.0060114
PLPAPLDGQRK	11	1	1	Unmodified	_PLPAPLDGQRK_			0	0	1	sp|Q8WWY3-4|PRP31_HUMAN;sp|Q8WWY3|PRP31_HUMAN;sp|Q8WWY3-3|PRP31_HUMAN	sp|Q8WWY3-4|PRP31_HUMAN	sp|Q8WWY3-4|PRP31_HUMAN	MSMS	0	16062020_SKO_IP_Cep78	1	exp_1	397.9	3	397.9	1190.68	NaN	NaN	NaN	NaN	NaN	NaN	NaN	NaN	NaN	NaN	20.151	1	20.151	19.651	20.651	0								0	0	0	0.00078638
PLPAPLDGQRK	11	1	1	Unmodified	_PLPAPLDGQRK_			0	0	1	sp|Q8WWY3-4|PRP31_HUMAN;sp|Q8WWY3|PRP31_HUMAN;sp|Q8WWY3-3|PRP31_HUMAN	sp|Q8WWY3-4|PRP31_HUMAN	sp|Q8WWY3-4|PRP31_HUMAN	MSMS	2	16062020_SKO_IP_Cep78	1	exp_1	403.908	3	397.9	1190.68	NaN	NaN	NaN	NaN	NaN	NaN	NaN	NaN	NaN	NaN	20.381	1	20.381	19.881	20.881	0								0	0	0	0.025839
PLYVALAQRK	10	1	1	Unmodified	_PLYVALAQRK_			0	0	1	sp|P11940-2|PABP1_HUMAN;sp|P11940|PABP1_HUMAN;sp|Q9H361|PABP3_HUMAN;sp|Q4VXU2|PAP1L_HUMAN;sp|Q13310-2|PABP4_HUMAN;sp|Q13310|PABP4_HUMAN;sp|Q13310-3|PABP4_HUMAN	sp|P11940-2|PABP1_HUMAN;sp|Q13310-2|PABP4_HUMAN	sp|P11940-2|PABP1_HUMAN	ISO-MSMS	2	16062020_SKO_IP_Cep78	1	exp_1	392.579	3	386.905	1157.69	NaN	NaN	NaN	0.95998	0.00037142	NaN	NaN	NaN	NaN	NaN	25.234	0.35498	25.234	25.06	25.415	0								0	0	0	0.017172
PLYVALAQRK	10	1	1	Unmodified	_PLYVALAQRK_			0	0	1	sp|P11940-2|PABP1_HUMAN;sp|P11940|PABP1_HUMAN;sp|Q9H361|PABP3_HUMAN;sp|Q4VXU2|PAP1L_HUMAN;sp|Q13310-2|PABP4_HUMAN;sp|Q13310|PABP4_HUMAN;sp|Q13310-3|PABP4_HUMAN	sp|P11940-2|PABP1_HUMAN;sp|Q13310-2|PABP4_HUMAN	sp|P11940-2|PABP1_HUMAN	ISO-MSMS	1	16062020_SKO_IP_Cep78	1	exp_1	390.257	3	386.905	1157.69	NaN	NaN	NaN	3.8374	0.0014847	NaN	NaN	NaN	NaN	NaN	25.225	0.27089	25.225	25.094	25.365	0								0	0	0	0.017018
PRHQEGEIFDTEK	13	1	1	Unmodified	_PRHQEGEIFDTEK_			0	0	1	sp|Q02878|RL6_HUMAN	sp|Q02878|RL6_HUMAN	sp|Q02878|RL6_HUMAN	ISO-MSMS	0	16062020_SKO_IP_Cep78	1	exp_1	529.259	3	529.258	1584.75	NaN	NaN	NaN	-0.54324	-0.00028751	NaN	NaN	NaN	NaN	NaN	13.811	0.23483	13.811	13.708	13.943	0								0	0	0	4.9761e-37
PRHQEGEIFDTEK	13	1	1	Unmodified	_PRHQEGEIFDTEK_			0	0	1	sp|Q02878|RL6_HUMAN	sp|Q02878|RL6_HUMAN	sp|Q02878|RL6_HUMAN	ISO-MSMS	2	16062020_SKO_IP_Cep78	1	exp_1	535.6	3	529.258	1584.75	NaN	NaN	NaN	-3.4893	-0.0018467	NaN	NaN	NaN	NaN	NaN	13.806	0.18449	13.806	13.708	13.892	0								0	0	0	4.1813e-06
PVHHGVNQLK	10	1	0	Unmodified	_PVHHGVNQLK_			0	0	0	sp|P61313|RL15_HUMAN;sp|P61313-2|RL15_HUMAN	sp|P61313|RL15_HUMAN	sp|P61313|RL15_HUMAN	ISO-MSMS	1	16062020_SKO_IP_Cep78	1	exp_1	378.222	3	376.881	1127.62	NaN	NaN	NaN	-0.43844	-0.00016524	NaN	NaN	NaN	NaN	NaN	1.155	0.4707	1.155	0.91646	1.3872	0								0	0	0	0.01406
PVHHGVNQLK	10	1	0	Unmodified	_PVHHGVNQLK_			0	0	0	sp|P61313|RL15_HUMAN;sp|P61313-2|RL15_HUMAN	sp|P61313|RL15_HUMAN	sp|P61313|RL15_HUMAN	ISO-MSMS	2	16062020_SKO_IP_Cep78	1	exp_1	379.552	3	376.881	1127.62	NaN	NaN	NaN	0.0095591	3.6026e-06	NaN	NaN	NaN	NaN	NaN	1.2109	1.2969	1.2109	0.91646	2.2133	0								0	0	0	0.0009543
PVHHGVNQLK	10	1	0	Unmodified	_PVHHGVNQLK_			0	0	0	sp|P61313|RL15_HUMAN;sp|P61313-2|RL15_HUMAN	sp|P61313|RL15_HUMAN	sp|P61313|RL15_HUMAN	ISO-MSMS	2	16062020_SKO_IP_Cep78	1	exp_1	379.22	3	376.881	1127.62	NaN	NaN	NaN	0.28957	0.00010913	NaN	NaN	NaN	NaN	NaN	2.2993	0.38167	2.2993	2.205	2.5867	0								0	0	0	0.0010538
QIRHESGASIK	11	1	1	Unmodified	_QIRHESGASIK_			0	0	1	sp|P61978-3|HNRPK_HUMAN;sp|P61978|HNRPK_HUMAN;sp|P61978-2|HNRPK_HUMAN	sp|P61978-3|HNRPK_HUMAN	sp|P61978-3|HNRPK_HUMAN	ISO-MSMS	0	16062020_SKO_IP_Cep78	1	exp_1	409.226	3	409.226	1224.66	NaN	NaN	NaN	-2.1863	-0.0008947	NaN	NaN	NaN	NaN	NaN	1.2233	0.20142	1.2233	1.085	1.2864	0								0	0	0	0.0068238
RAAVLLEQER	10	0	2	Unmodified	_RAAVLLEQER_			0	0	1	sp|Q13435|SF3B2_HUMAN	sp|Q13435|SF3B2_HUMAN	sp|Q13435|SF3B2_HUMAN	MULTI-MSMS		16062020_SKO_IP_Cep78	1	exp_1	395.564	3	395.563	1183.67	43483.8	2.5523	0.0010096	-0.45212	-0.00017884	2.1002	0.00083076	395.563	399.577	402.236	15.871	0.40428	15.871	15.674	16.079	0					122	23	9	0	0	0	5.3891e-06
RAFGSGYRR	9	0	3	Unmodified	_RAFGSGYRR_			0	0	2	sp|P23588|IF4B_HUMAN;sp|P23588-2|IF4B_HUMAN	sp|P23588|IF4B_HUMAN	sp|P23588|IF4B_HUMAN	MULTI-MSMS		16062020_SKO_IP_Cep78	1	exp_1	357.193	3	357.193	1068.56	46594.6	0.43752	0.00015628	-0.021946	-7.839e-06	0.41557	0.00014844	357.193	363.213	367.201	6.1087	0.11728	6.1087	6.0668	6.1841	0					28	6	8	0	0	0	1.3305e-62
RAGELTEDEVER	12	0	2	Unmodified	_RAGELTEDEVER_			0	0	1	sp|P62269|RS18_HUMAN	sp|P62269|RS18_HUMAN	sp|P62269|RS18_HUMAN	MULTI-SECPEP		16062020_SKO_IP_Cep78	1	exp_1	474.737	3	468.564	1402.67	40197	1.4503	0.00067955	-0.31604	-0.00014809	1.1343	0.00053147	468.563	472.577	475.236	14.347	0.21797	14.347	14.228	14.446	0					69	12	9	0	0	0	2.2939e-07
RAQSFAERLR	10	0	3	Unmodified	_RAQSFAERLR_			0	0	2	sp|O60256-3|KPRB_HUMAN;sp|O60256|KPRB_HUMAN;sp|O60256-4|KPRB_HUMAN;sp|O60256-2|KPRB_HUMAN	sp|O60256-3|KPRB_HUMAN	sp|O60256-3|KPRB_HUMAN	MSMS	0	16062020_SKO_IP_Cep78	1	exp_1	411.899	3	411.899	1232.67	NaN	NaN	NaN	NaN	NaN	NaN	NaN	NaN	NaN	NaN	11.704	1	11.704	11.204	12.204	0								0	0	0	7.0958e-05
RHFNAPSHIR	10	0	2	Unmodified	_RHFNAPSHIR_			0	0	1	sp|P61254|RL26_HUMAN	sp|P61254|RL26_HUMAN	sp|P61254|RL26_HUMAN	ISO-MSMS	2	16062020_SKO_IP_Cep78	1	exp_1	418.895	3	412.223	1233.65	NaN	NaN	NaN	-0.95073	-0.00039191	NaN	NaN	NaN	NaN	NaN	6.5276	0.20148	6.5276	6.4186	6.6201	0								0	0	0	0.0013877
RHFNAPSHIR	10	0	2	Unmodified	_RHFNAPSHIR_			0	0	1	sp|P61254|RL26_HUMAN	sp|P61254|RL26_HUMAN	sp|P61254|RL26_HUMAN	ISO-MSMS	0	16062020_SKO_IP_Cep78	1	exp_1	412.558	3	412.223	1233.65	NaN	NaN	NaN	-1.3134	-0.00054143	NaN	NaN	NaN	NaN	NaN	6.5276	0.2853	6.5276	6.3684	6.6537	0								0	0	0	2.0203e-07
RHIEIRDQALSNAQAK	16	1	2	Unmodified	_RHIEIRDQALSNAQAK_			0	0	2	sp|Q4VCS5-2|AMOT_HUMAN;sp|Q4VCS5|AMOT_HUMAN	sp|Q4VCS5-2|AMOT_HUMAN	sp|Q4VCS5-2|AMOT_HUMAN	MSMS	1	16062020_SKO_IP_Cep78	1	exp_1	622.695	3	617.338	1848.99	NaN	NaN	NaN	NaN	NaN	NaN	NaN	NaN	NaN	NaN	14.663	1	14.663	14.163	15.163	0								0	0	0	0.0077048
RHPEYAVSVLLR	12	0	2	Unmodified	_RHPEYAVSVLLR_			0	0	1	CON__P02769	CON__P02769	CON__P02769	MSMS	0	16062020_SKO_IP_Cep78	1	exp_1	480.611	3	480.609	1438.8	NaN	NaN	NaN	NaN	NaN	NaN	NaN	NaN	NaN	NaN	39.126	1	39.126	38.626	39.626	0								0	0	0	0.016635
RHPYFYAPELLYYANK	16	1	1	Unmodified	_RHPYFYAPELLYYANK_			0	0	1	CON__P02769	CON__P02769	CON__P02769	ISO-MSMS	0	16062020_SKO_IP_Cep78	1	exp_1	682.683	3	682.348	2044.02	NaN	NaN	NaN	0.16468	0.00011237	NaN	NaN	NaN	NaN	NaN	66.672	2.0591	66.672	65.705	67.764	0								0	0	0	5.4436e-08
RILMEHIHK	9	1	1	Oxidation (M)	_RILM(ox)EHIHK_	RILM(1)EHIHK	RILM(87.26)EHIHK	0	1	1	sp|P84098|RL19_HUMAN	sp|P84098|RL19_HUMAN	sp|P84098|RL19_HUMAN	MULTI-MSMS		16062020_SKO_IP_Cep78	1	exp_1	398.226	3	398.225	1191.65	42227.6	0.55928	0.00022272	0.86177	0.00034318	1.4211	0.0005659	398.226	401.908	404.233	6.1926	0.13401	6.1926	6.1339	6.2679	0					46	7	11	0	0	0	2.5024e-05
RIRVDVADQAQDK	13	1	2	Unmodified	_RIRVDVADQAQDK_			0	0	2	sp|P23588|IF4B_HUMAN;sp|P23588-2|IF4B_HUMAN	sp|P23588|IF4B_HUMAN	sp|P23588|IF4B_HUMAN	MULTI-MSMS		16062020_SKO_IP_Cep78	1	exp_1	505.277	3	505.274	1512.8	39392.3	2.1196	0.001071	0.65072	0.00032879	2.7703	0.0013998	505.275	510.63	514.618	14.257	0.16794	14.257	14.144	14.312	0					47	9	8	0	0	0	5.1976e-100
RLEEFEGERER	11	0	3	Unmodified	_RLEEFEGERER_			0	0	2	sp|Q08378-4|GOGA3_HUMAN;sp|Q08378-2|GOGA3_HUMAN;sp|Q08378|GOGA3_HUMAN	sp|Q08378-4|GOGA3_HUMAN	sp|Q08378-4|GOGA3_HUMAN	ISO-MSMS	0	16062020_SKO_IP_Cep78	1	exp_1	483.909	3	483.908	1448.7	NaN	NaN	NaN	-1.0915	-0.0005282	NaN	NaN	NaN	NaN	NaN	13.563	0.16785	13.563	13.472	13.64	0								0	0	0	0.0024837
RLEIEHSVPK	10	1	1	Unmodified	_RLEIEHSVPK_			0	0	1	sp|Q9NZI8|IF2B1_HUMAN;sp|Q9NZI8-2|IF2B1_HUMAN	sp|Q9NZI8|IF2B1_HUMAN	sp|Q9NZI8|IF2B1_HUMAN	ISO-MSMS	0	16062020_SKO_IP_Cep78	1	exp_1	403.232	3	403.231	1206.67	NaN	NaN	NaN	-0.62694	-0.0002528	NaN	NaN	NaN	NaN	NaN	14.38	0.31859	14.38	14.211	14.53	1.7764e-15								0	0	0	0.0084483
RNVIEAVYSR	10	0	2	Unmodified	_RNVIEAVYSR_			0	0	1	sp|O75688|PPM1B_HUMAN;sp|O75688-4|PPM1B_HUMAN;sp|O75688-2|PPM1B_HUMAN;sp|O75688-3|PPM1B_HUMAN	sp|O75688|PPM1B_HUMAN	sp|O75688|PPM1B_HUMAN	ISO-MSMS	1	16062020_SKO_IP_Cep78	1	exp_1	407.239	3	402.891	1205.65	NaN	NaN	NaN	0.29752	0.00011987	NaN	NaN	NaN	NaN	NaN	25.386	0.23687	25.386	25.297	25.534	0								0	0	0	0.021017
RQLDRIIAK	9	1	2	Unmodified	_RQLDRIIAK_			0	0	2	sp|O43143|DHX15_HUMAN	sp|O43143|DHX15_HUMAN	sp|O43143|DHX15_HUMAN	MSMS	0	16062020_SKO_IP_Cep78	1	exp_1	371.568	3	371.568	1111.68	NaN	NaN	NaN	NaN	NaN	NaN	NaN	NaN	NaN	NaN	12.743	1	12.743	12.243	13.243	0								0	0	0	0.00058469
RRLETLLR	8	0	3	Unmodified	_RRLETLLR_			0	0	2	sp|O95816-2|BAG2_HUMAN;sp|O95816|BAG2_HUMAN	sp|O95816-2|BAG2_HUMAN	sp|O95816-2|BAG2_HUMAN	MSMS	0	16062020_SKO_IP_Cep78	1	exp_1	352.895	3	352.893	1055.66	NaN	NaN	NaN	NaN	NaN	NaN	NaN	NaN	NaN	NaN	15.788	1	15.788	15.288	16.288	0								0	0	0	1.8004e-42
RTGMVIHQVEAK	12	1	1	Oxidation (M)	_RTGM(ox)VIHQVEAK_	RTGM(1)VIHQVEAK	RTGM(66.78)VIHQVEAK	0	1	1	sp|Q9Y657|SPIN1_HUMAN;sp|Q5JUX0|SPIN3_HUMAN	sp|Q9Y657|SPIN1_HUMAN	sp|Q9Y657|SPIN1_HUMAN	ISO-MSMS	0	16062020_SKO_IP_Cep78	1	exp_1	462.251	3	462.25	1383.73	NaN	NaN	NaN	1.0408	0.00048109	NaN	NaN	NaN	NaN	NaN	6.3489	0.15076	6.3489	6.2511	6.4019	0								0	0	0	0.003015
RTNAENEFVTIK	12	1	1	Unmodified	_RTNAENEFVTIK_			0	0	1	sp|P04264|K2C1_HUMAN;CON__P04264	sp|P04264|K2C1_HUMAN	sp|P04264|K2C1_HUMAN	ISO-MSMS	0	16062020_SKO_IP_Cep78	1	exp_1	474.585	3	474.584	1420.73	NaN	NaN	NaN	-0.26105	-0.00012389	NaN	NaN	NaN	NaN	NaN	20.771	0.13426	20.771	20.678	20.812	0								0	0	0	2.2162e-05
RTNAENEFVTIKK	13	2	1	Unmodified	_RTNAENEFVTIKK_			0	0	2	sp|P04264|K2C1_HUMAN;CON__P04264	sp|P04264|K2C1_HUMAN	sp|P04264|K2C1_HUMAN	ISO-MSMS	0	16062020_SKO_IP_Cep78	1	exp_1	517.286	3	517.283	1548.83	NaN	NaN	NaN	-0.50985	-0.00026373	NaN	NaN	NaN	NaN	NaN	15.862	0.25236	15.862	15.742	15.995	0								0	0	0	2.2396e-89
RTNSTFNQVVLK	12	1	1	Unmodified	_RTNSTFNQVVLK_			0	0	1	sp|Q07020|RL18_HUMAN;sp|Q07020-2|RL18_HUMAN	sp|Q07020|RL18_HUMAN	sp|Q07020|RL18_HUMAN	ISO-MSMS	2	16062020_SKO_IP_Cep78	1	exp_1	475.605	3	469.597	1405.77	NaN	NaN	NaN	0.041725	1.9594e-05	NaN	NaN	NaN	NaN	NaN	20.445	0.20307	20.445	20.34	20.543	0								0	0	0	0.0016602
SAHATAPVNIAGSR	14	0	1	Unmodified	_SAHATAPVNIAGSR_			0	0	0	sp|Q9UQ35|SRRM2_HUMAN	sp|Q9UQ35|SRRM2_HUMAN	sp|Q9UQ35|SRRM2_HUMAN	ISO-MSMS	0	16062020_SKO_IP_Cep78	1	exp_1	451.24	3	451.241	1350.7	NaN	NaN	NaN	0.90483	0.0004083	NaN	NaN	NaN	NaN	NaN	14.941	0.20243	14.941	14.814	15.017	0								0	0	0	5.8348e-06
SDQYGRVFTSWTGGGAAASR	20	0	2	Unmodified	_SDQYGRVFTSWTGGGAAASR_			0	0	1	CON__P15636	CON__P15636	CON__P15636	ISO-MSMS	0	16062020_SKO_IP_Cep78	1	exp_1	691.998	3	691.996	2072.97	NaN	NaN	NaN	0.013039	9.0232e-06	NaN	NaN	NaN	NaN	NaN	45.167	1.7836	45.167	44.827	46.611	-7.1054e-15								0	0	0	2.2612e-05
SEFLVRENRK	10	1	2	Unmodified	_SEFLVRENRK_			0	0	2	sp|Q00577|PURA_HUMAN;sp|Q96QR8|PURB_HUMAN	sp|Q00577|PURA_HUMAN	sp|Q00577|PURA_HUMAN	ISO-MSMS	0	16062020_SKO_IP_Cep78	1	exp_1	426.57	3	426.57	1276.69	NaN	NaN	NaN	-1.0436	-0.00044515	NaN	NaN	NaN	NaN	NaN	9.7297	0.18594	9.7297	9.6501	9.836	0								0	0	0	0.017342
SESPKEPEQLRK	12	2	1	Unmodified	_SESPKEPEQLRK_			0	0	2	sp|P09651-3|ROA1_HUMAN;sp|P09651-2|ROA1_HUMAN;sp|P09651|ROA1_HUMAN	sp|P09651-3|ROA1_HUMAN	sp|P09651-3|ROA1_HUMAN	ISO-MSMS	0	16062020_SKO_IP_Cep78	1	exp_1	476.922	3	476.588	1426.74	NaN	NaN	NaN	0.18076	8.615e-05	NaN	NaN	NaN	NaN	NaN	6.8889	0.1676	6.8889	6.8027	6.9703	0								0	0	0	0.0011389
SFATASHRNTEEEGLK	16	1	1	Unmodified	_SFATASHRNTEEEGLK_			0	0	1	sp|Q9NYF8-3|BCLF1_HUMAN;sp|Q9NYF8-2|BCLF1_HUMAN;sp|Q9NYF8|BCLF1_HUMAN	sp|Q9NYF8-3|BCLF1_HUMAN	sp|Q9NYF8-3|BCLF1_HUMAN	ISO-MSMS	0	16062020_SKO_IP_Cep78	1	exp_1	592.954	3	592.955	1775.84	NaN	NaN	NaN	0.64719	0.00038375	NaN	NaN	NaN	NaN	NaN	10.668	0.21956	10.668	10.509	10.728	0								0	0	0	8.466e-10
SFATASHRNTEEEGLK	16	1	1	Unmodified	_SFATASHRNTEEEGLK_			0	0	1	sp|Q9NYF8-3|BCLF1_HUMAN;sp|Q9NYF8-2|BCLF1_HUMAN;sp|Q9NYF8|BCLF1_HUMAN	sp|Q9NYF8-3|BCLF1_HUMAN	sp|Q9NYF8-3|BCLF1_HUMAN	ISO-MSMS	2	16062020_SKO_IP_Cep78	1	exp_1	599.296	3	592.955	1775.84	NaN	NaN	NaN	-0.36261	-0.00021501	NaN	NaN	NaN	NaN	NaN	10.652	0.23632	10.652	10.492	10.728	0								0	0	0	1.0948e-08
SFATASHRNTEEEGLK	16	1	1	Unmodified	_SFATASHRNTEEEGLK_			0	0	1	sp|Q9NYF8-3|BCLF1_HUMAN;sp|Q9NYF8-2|BCLF1_HUMAN;sp|Q9NYF8|BCLF1_HUMAN	sp|Q9NYF8-3|BCLF1_HUMAN	sp|Q9NYF8-3|BCLF1_HUMAN	ISO-MSMS	1	16062020_SKO_IP_Cep78	1	exp_1	596.302	3	592.955	1775.84	NaN	NaN	NaN	-1.5471	-0.00091734	NaN	NaN	NaN	NaN	NaN	10.659	0.18603	10.659	10.526	10.712	-1.7764e-15								0	0	0	0.00090092
SGRGGNFGFGDSR	13	0	2	Unmodified	_SGRGGNFGFGDSR_			0	0	1	sp|P22626-2|ROA2_HUMAN;sp|P22626|ROA2_HUMAN	sp|P22626-2|ROA2_HUMAN	sp|P22626-2|ROA2_HUMAN	ISO-MSMS	0	16062020_SKO_IP_Cep78	1	exp_1	438.873	3	438.538	1312.59	NaN	NaN	NaN	0.53576	0.00023495	NaN	NaN	NaN	NaN	NaN	16.56	0.30348	16.56	16.398	16.702	0								0	0	0	0.0093603
SGTLACTGSLVNNTANDRK	19	1	1	Unmodified	_SGTLACTGSLVNNTANDRK_			0	0	1	CON__P15636	CON__P15636	CON__P15636	ISO-MSMS	0	16062020_SKO_IP_Cep78	1	exp_1	660.66	3	660.325	1977.95	NaN	NaN	NaN	0.084754	5.5965e-05	NaN	NaN	NaN	NaN	NaN	20.703	0.15111	20.703	20.611	20.762	0								0	0	0	8.7414e-26
SIFQHIQSAQSQR	13	0	1	Unmodified	_SIFQHIQSAQSQR_			0	0	0	sp|Q9Y2W1|TR150_HUMAN	sp|Q9Y2W1|TR150_HUMAN	sp|Q9Y2W1|TR150_HUMAN	ISO-MSMS	0	16062020_SKO_IP_Cep78	1	exp_1	510.599	3	510.599	1528.77	NaN	NaN	NaN	0.2234	0.00011407	NaN	NaN	NaN	NaN	NaN	23.542	0.54065	23.542	23.366	23.907	0								0	0	0	0.0074301
SKEEAEALYHSK	12	2	0	Unmodified	_SKEEAEALYHSK_			0	0	1	sp|P35908|K22E_HUMAN;CON__P35908v2;CON__P35908	sp|P35908|K22E_HUMAN	sp|P35908|K22E_HUMAN	MSMS	0	16062020_SKO_IP_Cep78	1	exp_1	464.563	3	464.565	1390.67	NaN	NaN	NaN	NaN	NaN	NaN	NaN	NaN	NaN	NaN	9.0807	1	9.0807	8.5807	9.5807	0								0	0	0	1.2717e-76
SKVEETTEHLVTK	13	2	0	Unmodified	_SKVEETTEHLVTK_			0	0	1	sp|P52732|KIF11_HUMAN	sp|P52732|KIF11_HUMAN	sp|P52732|KIF11_HUMAN	ISO-MSMS	0	16062020_SKO_IP_Cep78	1	exp_1	500.937	3	500.935	1499.78	NaN	NaN	NaN	0.81088	0.0004062	NaN	NaN	NaN	NaN	NaN	15.582	0.21916	15.582	15.472	15.692	0								0	0	0	5.5702e-14
SKVEETTEHLVTK	13	2	0	Unmodified	_SKVEETTEHLVTK_			0	0	1	sp|P52732|KIF11_HUMAN	sp|P52732|KIF11_HUMAN	sp|P52732|KIF11_HUMAN	ISO-MSMS	1	16062020_SKO_IP_Cep78	1	exp_1	503.622	3	500.935	1499.78	NaN	NaN	NaN	4.7118	0.0023603	NaN	NaN	NaN	NaN	NaN	15.557	0.20199	15.557	15.472	15.674	0								0	0	0	1.7389e-05
SKVEETTEHLVTK	13	2	0	Unmodified	_SKVEETTEHLVTK_			0	0	1	sp|P52732|KIF11_HUMAN	sp|P52732|KIF11_HUMAN	sp|P52732|KIF11_HUMAN	ISO-MSMS	2	16062020_SKO_IP_Cep78	1	exp_1	506.28	3	500.935	1499.78	NaN	NaN	NaN	1.3793	0.00069093	NaN	NaN	NaN	NaN	NaN	15.575	0.20199	15.575	15.472	15.674	-1.7764e-15								0	0	0	8.0728e-20
SLAEHRTPDVLK	12	1	1	Unmodified	_SLAEHRTPDVLK_			0	0	1	sp|P31948-3|STIP1_HUMAN;sp|P31948|STIP1_HUMAN;sp|P31948-2|STIP1_HUMAN	sp|P31948-3|STIP1_HUMAN	sp|P31948-3|STIP1_HUMAN	ISO-MSMS	0	16062020_SKO_IP_Cep78	1	exp_1	455.922	3	455.921	1364.74	NaN	NaN	NaN	1.1715	0.00053413	NaN	NaN	NaN	NaN	NaN	15.883	0.40438	15.883	15.557	15.961	-1.7764e-15								0	0	0	0.013891
SLTEHGVAATDGR	13	0	1	Unmodified	_SLTEHGVAATDGR_			0	0	0	sp|O75970-5|MPDZ_HUMAN;sp|O75970-3|MPDZ_HUMAN;sp|O75970-2|MPDZ_HUMAN;sp|O75970|MPDZ_HUMAN	sp|O75970-5|MPDZ_HUMAN	sp|O75970-5|MPDZ_HUMAN	ISO-MSMS	1	16062020_SKO_IP_Cep78	1	exp_1	440.56	3	438.553	1312.64	NaN	NaN	NaN	1.579	0.00069248	NaN	NaN	NaN	NaN	NaN	12.109	0.15171	12.109	12.007	12.159	1.7764e-15								0	0	0	4.8405e-14
SLTEHGVAATDGR	13	0	1	Unmodified	_SLTEHGVAATDGR_			0	0	0	sp|O75970-5|MPDZ_HUMAN;sp|O75970-3|MPDZ_HUMAN;sp|O75970-2|MPDZ_HUMAN;sp|O75970|MPDZ_HUMAN	sp|O75970-5|MPDZ_HUMAN	sp|O75970-5|MPDZ_HUMAN	ISO-MSMS	0	16062020_SKO_IP_Cep78	1	exp_1	438.554	3	438.553	1312.64	NaN	NaN	NaN	0.66694	0.00029249	NaN	NaN	NaN	NaN	NaN	12.089	0.1685	12.089	11.99	12.159	1.7764e-15								0	0	0	0.00011848
SQAHRDFVR	9	0	2	Unmodified	_SQAHRDFVR_			0	0	1	sp|Q9BQA1-2|MEP50_HUMAN;sp|Q9BQA1|MEP50_HUMAN	sp|Q9BQA1-2|MEP50_HUMAN	sp|Q9BQA1-2|MEP50_HUMAN	MSMS	0	16062020_SKO_IP_Cep78	1	exp_1	372.528	3	372.528	1114.56	NaN	NaN	NaN	NaN	NaN	NaN	NaN	NaN	NaN	NaN	6.0653	1	6.0653	5.5653	6.5653	0								0	0	0	9.3809e-06
SQIHDIVLVGGSTR	14	0	1	Unmodified	_SQIHDIVLVGGSTR_			0	0	0	sp|P11142|HSP7C_HUMAN;sp|P11142-2|HSP7C_HUMAN	sp|P11142|HSP7C_HUMAN	sp|P11142|HSP7C_HUMAN	MULTI-MSMS		16062020_SKO_IP_Cep78	1	exp_1	494.611	3	494.607	1480.8	40759	2.2535	0.0011146	1.1795	0.00058337	3.433	0.001698	494.608	496.615	497.944	32.45	0.49395	32.45	32.118	32.612	0					73	19	6	0	0	0	0.0057246
SQYEQLAEQNRK	12	1	1	Unmodified	_SQYEQLAEQNRK_			0	0	1	sp|P13645|K1C10_HUMAN;CON__P13645	sp|P13645|K1C10_HUMAN	sp|P13645|K1C10_HUMAN	ISO-MSMS	0	16062020_SKO_IP_Cep78	1	exp_1	498.584	3	498.583	1492.73	NaN	NaN	NaN	0.33892	0.00016898	NaN	NaN	NaN	NaN	NaN	14.168	0.28541	14.168	14.01	14.295	0								0	0	0	0.00090434
SRIHAEFVQQK	11	1	1	Unmodified	_SRIHAEFVQQK_			0	0	1	sp|P19474|RO52_HUMAN	sp|P19474|RO52_HUMAN	sp|P19474|RO52_HUMAN	ISO-MSMS	2	16062020_SKO_IP_Cep78	1	exp_1	454.254	3	448.246	1341.72	NaN	NaN	NaN	0.74243	0.00033279	NaN	NaN	NaN	NaN	NaN	12.15	0.27022	12.15	12.024	12.294	0								0	0	0	0.0010213
SRTGSESSQTGTSTTSSR	18	0	2	Unmodified	_SRTGSESSQTGTSTTSSR_			0	0	1	sp|P23588|IF4B_HUMAN;sp|P23588-2|IF4B_HUMAN	sp|P23588|IF4B_HUMAN	sp|P23588|IF4B_HUMAN	MSMS	0	16062020_SKO_IP_Cep78	1	exp_1	606.281	3	606.28	1815.82	NaN	NaN	NaN	NaN	NaN	NaN	NaN	NaN	NaN	NaN	2.4327	1	2.4327	1.9327	2.9327	0								0	0	0	5.0295e-74
SSQDHVDEEVFK	12	1	0	Unmodified	_SSQDHVDEEVFK_			0	0	0	sp|Q9BRS2|RIOK1_HUMAN	sp|Q9BRS2|RIOK1_HUMAN	sp|Q9BRS2|RIOK1_HUMAN	MULTI-MSMS		16062020_SKO_IP_Cep78	1	exp_1	475.225	3	473.884	1418.63	40843.4	0.46698	0.0002213	-0.015335	-7.2671e-06	0.45165	0.00021403	473.884	475.225	476.556	19.326	0.40402	19.326	19.094	19.498	0					147	23	11	0	0	0	0.00030547
STAGDTHLGGEDFDNR	16	0	1	Unmodified	_STAGDTHLGGEDFDNR_			0	0	0	sp|P11142|HSP7C_HUMAN;sp|P11142-2|HSP7C_HUMAN;sp|P54652|HSP72_HUMAN	sp|P11142|HSP7C_HUMAN	sp|P11142|HSP7C_HUMAN	MULTI-MSMS		16062020_SKO_IP_Cep78	1	exp_1	564.581	3	564.58	1690.72	37518.5	0.21921	0.00012376	0.47402	0.00026762	0.69323	0.00039138	564.58	566.587	567.917	19.207	0.33612	19.207	19.043	19.379	0					189	19	15	0	0	0	3.2383e-07
TALLDAAGVASLLTTAEVVVTEIPK	25	1	0	Unmodified	_TALLDAAGVASLLTTAEVVVTEIPK_			0	0	0	sp|P10809|CH60_HUMAN	sp|P10809|CH60_HUMAN	sp|P10809|CH60_HUMAN	ISO-MSMS	0	16062020_SKO_IP_Cep78	1	exp_1	828.475	3	828.139	2481.39	NaN	NaN	NaN	0.18559	0.0001537	NaN	NaN	NaN	NaN	NaN	116.82	0.10236	116.82	116.76	116.87	0								0	0	0	4.422e-151
TALLDAAGVASLLTTAEVVVTEIPK	25	1	0	Unmodified	_TALLDAAGVASLLTTAEVVVTEIPK_			0	0	0	sp|P10809|CH60_HUMAN	sp|P10809|CH60_HUMAN	sp|P10809|CH60_HUMAN	ISO-MSMS	2	16062020_SKO_IP_Cep78	1	exp_1	831.146	3	828.139	2481.39	NaN	NaN	NaN	0.25991	0.00021524	NaN	NaN	NaN	NaN	NaN	116.82	0.06789	116.82	116.78	116.85	0								0	0	0	0.011291
TALLDAAGVASLLTTAEVVVTEIPKEEK	28	2	0	Unmodified	_TALLDAAGVASLLTTAEVVVTEIPKEEK_			0	0	1	sp|P10809|CH60_HUMAN	sp|P10809|CH60_HUMAN	sp|P10809|CH60_HUMAN	ISO-MSMS	0	16062020_SKO_IP_Cep78	1	exp_1	956.863	3	956.865	2867.57	NaN	NaN	NaN	-1.0962	-0.0010489	NaN	NaN	NaN	NaN	NaN	115.88	0.39151	115.88	115.68	116.07	0								0	0	0	0.0002351
TDGPVFHSNTLER	13	0	1	Unmodified	_TDGPVFHSNTLER_			0	0	0	sp|Q4VCS5-2|AMOT_HUMAN;sp|Q4VCS5|AMOT_HUMAN	sp|Q4VCS5-2|AMOT_HUMAN	sp|Q4VCS5-2|AMOT_HUMAN	ISO-MSMS	1	16062020_SKO_IP_Cep78	1	exp_1	493.584	3	491.576	1471.71	NaN	NaN	NaN	-0.022425	-1.1023e-05	NaN	NaN	NaN	NaN	NaN	21.209	0.45485	21.209	21.013	21.468	0								0	0	0	1.9188e-06
TDGPVFHSNTLER	13	0	1	Unmodified	_TDGPVFHSNTLER_			0	0	0	sp|Q4VCS5-2|AMOT_HUMAN;sp|Q4VCS5|AMOT_HUMAN	sp|Q4VCS5-2|AMOT_HUMAN	sp|Q4VCS5-2|AMOT_HUMAN	ISO-MSMS	0	16062020_SKO_IP_Cep78	1	exp_1	491.909	3	491.576	1471.71	NaN	NaN	NaN	0.71328	0.00035063	NaN	NaN	NaN	NaN	NaN	21.218	0.47541	21.218	21.023	21.498	0								0	0	0	5.2475e-14
TDGPVFHSNTLERK	14	1	1	Unmodified	_TDGPVFHSNTLERK_			0	0	1	sp|Q4VCS5-2|AMOT_HUMAN;sp|Q4VCS5|AMOT_HUMAN	sp|Q4VCS5-2|AMOT_HUMAN	sp|Q4VCS5-2|AMOT_HUMAN	ISO-MSMS	0	16062020_SKO_IP_Cep78	1	exp_1	534.274	3	534.274	1599.8	NaN	NaN	NaN	-0.10907	-5.8271e-05	NaN	NaN	NaN	NaN	NaN	16.525	0.48808	16.525	16.197	16.685	0								0	0	0	3.6259e-07
TDLFYERK	8	1	1	Unmodified	_TDLFYERK_			0	0	1	sp|Q7RTV0|PHF5A_HUMAN	sp|Q7RTV0|PHF5A_HUMAN	sp|Q7RTV0|PHF5A_HUMAN	MULTI-MSMS		16062020_SKO_IP_Cep78	1	exp_1	357.854	3	357.854	1070.54	46509.4	1.0847	0.00038817	0.078025	2.7922e-05	1.1627	0.00041609	357.854	361.203	363.862	19.657	0.30389	19.657	19.498	19.802	0					97	17	9	0	0	0	1.96e-07
TEELKPQVEEK	11	2	0	Unmodified	_TEELKPQVEEK_			0	0	1	sp|Q9UN86-2|G3BP2_HUMAN;sp|Q9UN86|G3BP2_HUMAN	sp|Q9UN86-2|G3BP2_HUMAN	sp|Q9UN86-2|G3BP2_HUMAN	ISO-MSMS	0	16062020_SKO_IP_Cep78	1	exp_1	443.902	3	443.901	1328.68	NaN	NaN	NaN	0.17713	7.8626e-05	NaN	NaN	NaN	NaN	NaN	13.192	0.21882	13.192	13.052	13.271	0								0	0	0	0.0046972
TFSGQTHGFVHR	12	0	1	Unmodified	_TFSGQTHGFVHR_			0	0	0	sp|Q96DG6|CMBL_HUMAN	sp|Q96DG6|CMBL_HUMAN	sp|Q96DG6|CMBL_HUMAN	MULTI-MSMS		16062020_SKO_IP_Cep78	1	exp_1	461.898	3	458.562	1372.66	42442	1.6813	0.00077097	-0.41401	-0.00018985	1.2673	0.00058112	458.562	460.902	461.897	13.178	0.2522	13.178	13.103	13.355	0					56	14	7	0	0	0	5.4552e-22
TFVRGGVVNAAK	12	1	1	Unmodified	_TFVRGGVVNAAK_			0	0	1	sp|O15042-2|SR140_HUMAN;sp|O15042|SR140_HUMAN	sp|O15042-2|SR140_HUMAN	sp|O15042-2|SR140_HUMAN	ISO-MSMS	2	16062020_SKO_IP_Cep78	1	exp_1	412.911	3	406.903	1217.69	NaN	NaN	NaN	-1.1667	-0.00047472	NaN	NaN	NaN	NaN	NaN	14.34	0.13412	14.34	14.262	14.396	0								0	0	0	0.017784
TFVRGGVVNAAK	12	1	1	Unmodified	_TFVRGGVVNAAK_			0	0	1	sp|O15042-2|SR140_HUMAN;sp|O15042|SR140_HUMAN	sp|O15042-2|SR140_HUMAN	sp|O15042-2|SR140_HUMAN	ISO-MSMS	0	16062020_SKO_IP_Cep78	1	exp_1	406.904	3	406.903	1217.69	NaN	NaN	NaN	-1.7052	-0.00069383	NaN	NaN	NaN	NaN	NaN	14.349	0.13412	14.349	14.262	14.396	0								0	0	0	9.0225e-05
THRETFFK	8	1	1	Unmodified	_THRETFFK_			0	0	1	sp|Q96AV8-3|E2F7_HUMAN;sp|Q96AV8|E2F7_HUMAN	sp|Q96AV8-3|E2F7_HUMAN	sp|Q96AV8-3|E2F7_HUMAN	ISO-MSMS	0	16062020_SKO_IP_Cep78	1	exp_1	355.854	3	355.854	1064.54	NaN	NaN	NaN	-0.83741	-0.000298	NaN	NaN	NaN	NaN	NaN	8.6385	0.12987	8.6385	8.56	8.6898	-1.7764e-15								0	0	0	0.0062009
TIAPQNAPRDESR	13	0	2	Unmodified	_TIAPQNAPRDESR_			0	0	1	sp|Q9NYF8-3|BCLF1_HUMAN;sp|Q9NYF8-2|BCLF1_HUMAN;sp|Q9NYF8|BCLF1_HUMAN;sp|Q9NYF8-4|BCLF1_HUMAN	sp|Q9NYF8-3|BCLF1_HUMAN	sp|Q9NYF8-3|BCLF1_HUMAN	ISO-MSMS	0	16062020_SKO_IP_Cep78	1	exp_1	485.582	3	485.583	1453.73	NaN	NaN	NaN	-1.6453	-0.00079894	NaN	NaN	NaN	NaN	NaN	9.2658	0.23446	9.2658	9.1337	9.3682	0								0	0	0	0.00019611
TIAPQNAPRDESR	13	0	2	Unmodified	_TIAPQNAPRDESR_			0	0	1	sp|Q9NYF8-3|BCLF1_HUMAN;sp|Q9NYF8-2|BCLF1_HUMAN;sp|Q9NYF8|BCLF1_HUMAN;sp|Q9NYF8-4|BCLF1_HUMAN	sp|Q9NYF8-3|BCLF1_HUMAN	sp|Q9NYF8-3|BCLF1_HUMAN	ISO-MSMS	2	16062020_SKO_IP_Cep78	1	exp_1	492.256	3	485.583	1453.73	NaN	NaN	NaN	-0.41686	-0.00020242	NaN	NaN	NaN	NaN	NaN	9.2571	0.20093	9.2571	9.1337	9.3346	0								0	0	0	0.0081658
TIAPQNAPRDESR	13	0	2	Unmodified	_TIAPQNAPRDESR_			0	0	1	sp|Q9NYF8-3|BCLF1_HUMAN;sp|Q9NYF8-2|BCLF1_HUMAN;sp|Q9NYF8|BCLF1_HUMAN;sp|Q9NYF8-4|BCLF1_HUMAN	sp|Q9NYF8-3|BCLF1_HUMAN	sp|Q9NYF8-3|BCLF1_HUMAN	MSMS	1	16062020_SKO_IP_Cep78	1	exp_1	489.597	3	485.583	1453.73	NaN	NaN	NaN	NaN	NaN	NaN	NaN	NaN	NaN	NaN	9.2363	1	9.2363	8.7363	9.7363	0								0	0	0	0.024826
TILPGGVADQHGR	13	0	1	Unmodified	_TILPGGVADQHGR_			0	0	0	sp|O75970-5|MPDZ_HUMAN;sp|O75970-3|MPDZ_HUMAN;sp|O75970-2|MPDZ_HUMAN;sp|O75970|MPDZ_HUMAN	sp|O75970-5|MPDZ_HUMAN	sp|O75970-5|MPDZ_HUMAN	ISO-MSMS	1	16062020_SKO_IP_Cep78	1	exp_1	442.913	3	440.905	1319.69	NaN	NaN	NaN	-0.047567	-2.0972e-05	NaN	NaN	NaN	NaN	NaN	20.069	0.18479	20.069	19.97	20.155	0								0	0	0	0.017109
TNRPPLSLSR	10	0	2	Unmodified	_TNRPPLSLSR_			0	0	1	sp|Q07020|RL18_HUMAN;sp|Q07020-2|RL18_HUMAN	sp|Q07020|RL18_HUMAN	sp|Q07020|RL18_HUMAN	MULTI-MSMS		16062020_SKO_IP_Cep78	1	exp_1	387.56	3	380.888	1139.64	43155.2	1.9362	0.00073749	-2.1912	-0.00083459	-0.25494	-9.7103e-05	380.887	384.901	387.56	17.241	0.26958	17.241	17.089	17.359	0					76	15	8	0	0	0	1.5825e-28
TNYNDRYDEIRR	12	0	3	Unmodified	_TNYNDRYDEIRR_			0	0	2	sp|P62424|RL7A_HUMAN	sp|P62424|RL7A_HUMAN	sp|P62424|RL7A_HUMAN	ISO-MSMS	2	16062020_SKO_IP_Cep78	1	exp_1	548.934	3	538.925	1613.75	NaN	NaN	NaN	-0.98069	-0.00052852	NaN	NaN	NaN	NaN	NaN	14.521	0.11734	14.521	14.463	14.58	1.7764e-15								0	0	0	6.1618e-06
TNYNDRYDEIRR	12	0	3	Unmodified	_TNYNDRYDEIRR_			0	0	2	sp|P62424|RL7A_HUMAN	sp|P62424|RL7A_HUMAN	sp|P62424|RL7A_HUMAN	ISO-MSMS	0	16062020_SKO_IP_Cep78	1	exp_1	538.925	3	538.925	1613.75	NaN	NaN	NaN	-0.66151	-0.00035651	NaN	NaN	NaN	NaN	NaN	14.532	0.13411	14.532	14.463	14.597	1.7764e-15								0	0	0	0.0023511
TPHVPYRESK	10	1	1	Unmodified	_TPHVPYRESK_			0	0	1	sp|P52732|KIF11_HUMAN	sp|P52732|KIF11_HUMAN	sp|P52732|KIF11_HUMAN	ISO-MSMS	0	16062020_SKO_IP_Cep78	1	exp_1	405.216	3	405.216	1212.63	NaN	NaN	NaN	1.131	0.0004583	NaN	NaN	NaN	NaN	NaN	7.032	0.312	7.032	6.7691	7.0811	0								0	0	0	0.0015537
TPVEPEVAIHR	11	0	1	Unmodified	_TPVEPEVAIHR_			0	0	0	sp|P60866|RS20_HUMAN;sp|P60866-2|RS20_HUMAN	sp|P60866|RS20_HUMAN	sp|P60866|RS20_HUMAN	ISO-MSMS	0	16062020_SKO_IP_Cep78	1	exp_1	416.563	3	416.563	1246.67	NaN	NaN	NaN	-0.17444	-7.2664e-05	NaN	NaN	NaN	NaN	NaN	20.893	0.2777	20.893	20.745	21.023	0								0	0	0	0.00050187
TYVPALEQSADGHK	14	1	0	Unmodified	_TYVPALEQSADGHK_			0	0	0	sp|P98175-2|RBM10_HUMAN;sp|P98175|RBM10_HUMAN;sp|P98175-4|RBM10_HUMAN;sp|P98175-3|RBM10_HUMAN	sp|P98175-2|RBM10_HUMAN	sp|P98175-2|RBM10_HUMAN	ISO-MSMS	0	16062020_SKO_IP_Cep78	1	exp_1	506.589	3	505.919	1514.74	NaN	NaN	NaN	1.5019	0.00075983	NaN	NaN	NaN	NaN	NaN	23.697	0.33789	23.697	23.518	23.856	0								0	0	0	0.009298
VAFERGEEPGK	11	1	1	Unmodified	_VAFERGEEPGK_			0	0	1	sp|Q08211|DHX9_HUMAN	sp|Q08211|DHX9_HUMAN	sp|Q08211|DHX9_HUMAN	ISO-MSMS	2	16062020_SKO_IP_Cep78	1	exp_1	412.883	3	406.875	1217.6	NaN	NaN	NaN	-1.3257	-0.00053941	NaN	NaN	NaN	NaN	NaN	12.936	0.20235	12.936	12.85	13.052	1.7764e-15								0	0	0	0.0080334
VAFERGEEPGK	11	1	1	Unmodified	_VAFERGEEPGK_			0	0	1	sp|Q08211|DHX9_HUMAN	sp|Q08211|DHX9_HUMAN	sp|Q08211|DHX9_HUMAN	ISO-MSMS	0	16062020_SKO_IP_Cep78	1	exp_1	406.876	3	406.875	1217.6	NaN	NaN	NaN	-0.18247	-7.4242e-05	NaN	NaN	NaN	NaN	NaN	12.949	0.21915	12.949	12.85	13.069	0								0	0	0	0.0073509
VALTGLTVAEYFRDQEGQDVLLFIDNIFR	29	0	2	Unmodified	_VALTGLTVAEYFRDQEGQDVLLFIDNIFR_			0	0	1	sp|P06576|ATPB_HUMAN	sp|P06576|ATPB_HUMAN	sp|P06576|ATPB_HUMAN	ISO-MSMS	0	16062020_SKO_IP_Cep78	1	exp_1	1115.25	3	1114.92	3341.73	NaN	NaN	NaN	1.7864	0.0019917	NaN	NaN	NaN	NaN	NaN	116.64	0.051682	116.64	116.59	116.65	0								0	0	0	1.3706e-16
VAPAQPSEEGPGRK	14	1	1	Unmodified	_VAPAQPSEEGPGRK_			0	0	1	sp|P23588|IF4B_HUMAN;sp|P23588-2|IF4B_HUMAN	sp|P23588|IF4B_HUMAN	sp|P23588|IF4B_HUMAN	MULTI-MSMS		16062020_SKO_IP_Cep78	1	exp_1	475.251	3	474.916	1421.73	39534.8	0.28969	0.00013758	0.39506	0.00018762	0.68475	0.0003252	474.916	478.6	480.923	6.8766	0.25034	6.8766	6.7032	6.9535	0					100	14	11	0	0	0	4.288e-25
VAPAQPSEEGPGRKDENK	18	2	1	Unmodified	_VAPAQPSEEGPGRKDENK_			0	0	2	sp|P23588|IF4B_HUMAN;sp|P23588-2|IF4B_HUMAN	sp|P23588|IF4B_HUMAN	sp|P23588|IF4B_HUMAN	MULTI-MSMS		16062020_SKO_IP_Cep78	1	exp_1	636.986	3	636.985	1907.93	35647.1	0.74626	0.00047536	-0.46891	-0.00029869	0.27735	0.00017667	636.985	641.675	645.663	6.4092	0.28488	6.4092	6.2846	6.5695	8.8818e-16					124	16	12	0	0	0	1.6802e-28
VAQLEQVYIRGSK	13	1	1	Unmodified	_VAQLEQVYIRGSK_			0	0	1	sp|P62318-2|SMD3_HUMAN;sp|P62318|SMD3_HUMAN	sp|P62318-2|SMD3_HUMAN	sp|P62318-2|SMD3_HUMAN	ISO-MSMS	2	16062020_SKO_IP_Cep78	1	exp_1	503.623	3	497.616	1489.83	NaN	NaN	NaN	-0.42195	-0.00020997	NaN	NaN	NaN	NaN	NaN	27.045	0.28708	27.045	26.887	27.174	3.5527e-15								0	0	0	0.017781
VAYVSFGPHAGK	12	1	0	Unmodified	_VAYVSFGPHAGK_			0	0	0	sp|P50914|RL14_HUMAN	sp|P50914|RL14_HUMAN	sp|P50914|RL14_HUMAN	MSMS	0	16062020_SKO_IP_Cep78	1	exp_1	411.551	3	411.552	1231.63	NaN	NaN	NaN	NaN	NaN	NaN	NaN	NaN	NaN	NaN	24.316	1	24.316	23.816	24.816	0								0	0	0	0.020188
VDEAVAVLQAHHAK	14	1	0	Unmodified	_VDEAVAVLQAHHAK_			0	0	0	sp|Q13310-2|PABP4_HUMAN;sp|Q13310|PABP4_HUMAN;sp|Q13310-3|PABP4_HUMAN	sp|Q13310-2|PABP4_HUMAN	sp|Q13310-2|PABP4_HUMAN	MULTI-MSMS		16062020_SKO_IP_Cep78	1	exp_1	496.938	3	496.604	1486.79	40668.3	1.1553	0.00057373	0.18765	9.3189e-05	1.343	0.00066692	496.604	497.945	499.276	19.727	0.42171	19.727	19.582	20.003	0					119	24	8	0	0	0	6.435e-34
VDNDENEHQLSLR	13	0	1	Unmodified	_VDNDENEHQLSLR_			0	0	0	sp|P06748-3|NPM_HUMAN;sp|P06748-2|NPM_HUMAN;sp|P06748|NPM_HUMAN	sp|P06748-3|NPM_HUMAN	sp|P06748-3|NPM_HUMAN	ISO-MSMS	0	16062020_SKO_IP_Cep78	1	exp_1	523.583	3	523.581	1567.72	NaN	NaN	NaN	-0.38687	-0.00020256	NaN	NaN	NaN	NaN	NaN	17.548	0.35451	17.548	17.342	17.697	0								0	0	0	7.7883e-06
VDNDENEHQLSLR	13	0	1	Unmodified	_VDNDENEHQLSLR_			0	0	0	sp|P06748-3|NPM_HUMAN;sp|P06748-2|NPM_HUMAN;sp|P06748|NPM_HUMAN	sp|P06748-3|NPM_HUMAN	sp|P06748-3|NPM_HUMAN	MSMS	2	16062020_SKO_IP_Cep78	1	exp_1	526.918	3	523.581	1567.72	NaN	NaN	NaN	NaN	NaN	NaN	NaN	NaN	NaN	NaN	17.557	1	17.557	17.057	18.057	0								0	0	0	0.0058546
VEETTEHLVTK	11	1	0	Unmodified	_VEETTEHLVTK_			0	0	0	sp|P52732|KIF11_HUMAN	sp|P52732|KIF11_HUMAN	sp|P52732|KIF11_HUMAN	MULTI-MSMS		16062020_SKO_IP_Cep78	1	exp_1	430.902	3	429.226	1284.66	42300	1.2908	0.00055404	-0.70155	-0.00030113	0.58922	0.00025291	429.226	430.567	431.897	13.498	0.35252	13.498	13.254	13.607	0					129	20	11	0	0	0	1.6613e-21
VEILANDQGNRTTPSYVAFTDTER	24	0	2	Unmodified	_VEILANDQGNRTTPSYVAFTDTER_			0	0	1	sp|P17066|HSP76_HUMAN;sp|P48741|HSP77_HUMAN	sp|P17066|HSP76_HUMAN	sp|P17066|HSP76_HUMAN	ISO-MSMS	0	16062020_SKO_IP_Cep78	1	exp_1	899.776	3	899.775	2696.3	NaN	NaN	NaN	-0.13622	-0.00012257	NaN	NaN	NaN	NaN	NaN	49.155	0.5287	49.155	48.902	49.43	0								0	0	0	1.5345e-23
VEQATKPSFESGR	13	1	1	Unmodified	_VEQATKPSFESGR_			0	0	1	sp|P38159-2|RBMX_HUMAN;sp|P38159|RBMX_HUMAN	sp|P38159-2|RBMX_HUMAN	sp|P38159-2|RBMX_HUMAN	ISO-MSMS	0	16062020_SKO_IP_Cep78	1	exp_1	479.58	3	479.244	1434.71	NaN	NaN	NaN	3.4381	0.0016477	NaN	NaN	NaN	NaN	NaN	13.035	0.15142	13.035	12.951	13.103	-1.7764e-15								0	0	0	7.2905e-08
VETFSGVYKK	10	2	0	Unmodified	_VETFSGVYKK_			0	0	1	sp|P62081|RS7_HUMAN	sp|P62081|RS7_HUMAN	sp|P62081|RS7_HUMAN	ISO-MSMS	0	16062020_SKO_IP_Cep78	1	exp_1	386.546	3	386.545	1156.61	NaN	NaN	NaN	0.99639	0.00038515	NaN	NaN	NaN	NaN	NaN	17.283	0.21938	17.283	17.157	17.376	0								0	0	0	0.018303
VETFSGVYKK	10	2	0	Unmodified	_VETFSGVYKK_			0	0	1	sp|P62081|RS7_HUMAN	sp|P62081|RS7_HUMAN	sp|P62081|RS7_HUMAN	MSMS	2	16062020_SKO_IP_Cep78	1	exp_1	391.889	3	386.545	1156.61	NaN	NaN	NaN	NaN	NaN	NaN	NaN	NaN	NaN	NaN	17.263	1	17.263	16.763	17.763	0								0	0	0	0.022774
VFLLDRGNTRDK	12	1	2	Unmodified	_VFLLDRGNTRDK_			0	0	2	sp|Q9NYF8-3|BCLF1_HUMAN;sp|Q9NYF8-2|BCLF1_HUMAN;sp|Q9NYF8|BCLF1_HUMAN	sp|Q9NYF8-3|BCLF1_HUMAN	sp|Q9NYF8-3|BCLF1_HUMAN	MULTI-MSMS		16062020_SKO_IP_Cep78	1	exp_1	487.945	3	478.6	1432.78	40665.5	1.943	0.00092992	-0.25666	-0.00012284	1.6863	0.00080708	478.6	483.955	487.944	20.634	0.28627	20.634	20.492	20.778	0					82	16	10	0	0	0	0.0072601
VGAGAPVYLAAVLEYLTAEILELAGNAAR	29	0	1	Unmodified	_VGAGAPVYLAAVLEYLTAEILELAGNAAR_			0	0	0	sp|Q99878|H2A1J_HUMAN;sp|Q96KK5|H2A1H_HUMAN;sp|Q9BTM1|H2AJ_HUMAN;sp|Q93077|H2A1C_HUMAN;sp|Q7L7L0|H2A3_HUMAN;sp|P20671|H2A1D_HUMAN;sp|P0C0S8|H2A1_HUMAN;sp|P04908|H2A1B_HUMAN;sp|P16104|H2AX_HUMAN;sp|Q9BTM1-2|H2AJ_HUMAN;sp|Q8IUE6|H2A2B_HUMAN	sp|Q99878|H2A1J_HUMAN	sp|Q99878|H2A1J_HUMAN	ISO-MSMS	0	16062020_SKO_IP_Cep78	1	exp_1	972.869	3	972.534	2914.58	NaN	NaN	NaN	-1.6097	-0.0015655	NaN	NaN	NaN	NaN	NaN	117.15	0.06778	117.15	117.12	117.19	1.4211e-14								0	0	0	1.3326e-30
VGAGAPVYMAAVLEYLTAEILELAGNAAR	29	0	1	Oxidation (M)	_VGAGAPVYM(ox)AAVLEYLTAEILELAGNAAR_	VGAGAPVYM(1)AAVLEYLTAEILELAGNAAR	VGAGAPVYM(159.2)AAVLEYLTAEILELAGNAAR	0	1	0	sp|Q16777|H2A2C_HUMAN;sp|Q6FI13|H2A2A_HUMAN	sp|Q16777|H2A2C_HUMAN	sp|Q16777|H2A2C_HUMAN	ISO-MSMS	0	16062020_SKO_IP_Cep78	1	exp_1	984.187	3	983.851	2948.53	NaN	NaN	NaN	-0.53342	-0.00052481	NaN	NaN	NaN	NaN	NaN	116.79	0.051506	116.79	116.75	116.8	0								0	0	0	2.9751e-60
VGAGAPVYMAAVLEYLTAEILELAGNAAR	29	0	1	Unmodified	_VGAGAPVYMAAVLEYLTAEILELAGNAAR_			0	0	0	sp|Q16777|H2A2C_HUMAN;sp|Q6FI13|H2A2A_HUMAN	sp|Q16777|H2A2C_HUMAN	sp|Q16777|H2A2C_HUMAN	ISO-MSMS	0	16062020_SKO_IP_Cep78	1	exp_1	978.853	3	978.52	2932.54	NaN	NaN	NaN	-2.7951	-0.002735	NaN	NaN	NaN	NaN	NaN	117.03	0.051327	117.03	116.99	117.04	0								0	0	0	1.3326e-30
VGATAAVYSAAILEYLTAEVLELAGNASK	29	1	0	Unmodified	_VGATAAVYSAAILEYLTAEVLELAGNASK_			0	0	0	sp|Q71UI9-4|H2AV_HUMAN;sp|Q71UI9-2|H2AV_HUMAN;sp|Q71UI9|H2AV_HUMAN;sp|P0C0S5|H2AZ_HUMAN	sp|Q71UI9-4|H2AV_HUMAN	sp|Q71UI9-4|H2AV_HUMAN	ISO-MSMS	0	16062020_SKO_IP_Cep78	1	exp_1	966.187	3	965.85	2894.53	NaN	NaN	NaN	-1.3401	-0.0012943	NaN	NaN	NaN	NaN	NaN	116.84	0.068172	116.84	116.8	116.87	0								0	0	0	2.7612e-31
VHPEIINENGNPSYK	15	1	0	Unmodified	_VHPEIINENGNPSYK_			0	0	0	sp|O95881|TXD12_HUMAN	sp|O95881|TXD12_HUMAN	sp|O95881|TXD12_HUMAN	MULTI-MSMS		16062020_SKO_IP_Cep78	1	exp_1	570.953	3	570.953	1709.84	36983.2	0.3776	0.00021559	2.4297	0.0013872	2.8073	0.0016028	570.954	572.63	573.962	20.463	0.21953	20.463	20.357	20.577	0					67	12	9	0	0	0	2.8789e-05
VIGRGAFGEVR	11	0	2	Unmodified	_VIGRGAFGEVR_			0	0	1	sp|Q15208|STK38_HUMAN;sp|Q9Y2H1|ST38L_HUMAN	sp|Q15208|STK38_HUMAN;sp|Q9Y2H1|ST38L_HUMAN	sp|Q9Y2H1|ST38L_HUMAN	ISO-MSMS	0	16062020_SKO_IP_Cep78	1	exp_1	387.556	3	387.556	1159.65	NaN	NaN	NaN	0.61172	0.00023708	NaN	NaN	NaN	NaN	NaN	19.136	0.21843	19.136	19.01	19.228	0								0	0	0	0.027304
VLATVTKPVGGDK	13	2	0	Unmodified	_VLATVTKPVGGDK_			0	0	1	sp|Q02878|RL6_HUMAN	sp|Q02878|RL6_HUMAN	sp|Q02878|RL6_HUMAN	ISO-MSMS	2	16062020_SKO_IP_Cep78	1	exp_1	434.269	3	428.922	1283.74	NaN	NaN	NaN	0.96836	0.00041535	NaN	NaN	NaN	NaN	NaN	15.633	0.30359	15.633	15.489	15.793	1.7764e-15								0	0	0	6.6438e-06
VLATVTKPVGGDK	13	2	0	Unmodified	_VLATVTKPVGGDK_			0	0	1	sp|Q02878|RL6_HUMAN	sp|Q02878|RL6_HUMAN	sp|Q02878|RL6_HUMAN	ISO-MSMS	0	16062020_SKO_IP_Cep78	1	exp_1	428.924	3	428.922	1283.74	NaN	NaN	NaN	1.3423	0.00057576	NaN	NaN	NaN	NaN	NaN	15.646	0.2362	15.646	15.523	15.759	-1.7764e-15								0	0	0	1.3001e-06
VMEEEGLKDEEK	12	2	0	Oxidation (M)	_VM(ox)EEEGLKDEEK_	VM(1)EEEGLKDEEK	VM(104.59)EEEGLKDEEK	0	1	1	sp|Q15208|STK38_HUMAN	sp|Q15208|STK38_HUMAN	sp|Q15208|STK38_HUMAN	ISO-MSMS	0	16062020_SKO_IP_Cep78	1	exp_1	484.555	3	484.557	1450.65	NaN	NaN	NaN	-1.0299	-0.00049905	NaN	NaN	NaN	NaN	NaN	9.7095	0.28671	9.7095	9.5325	9.8192	0								0	0	0	5.9871e-05
VMEEEGLKDEEK	12	2	0	Oxidation (M)	_VM(ox)EEEGLKDEEK_	VM(1)EEEGLKDEEK	VM(112.43)EEEGLKDEEK	0	1	1	sp|Q15208|STK38_HUMAN	sp|Q15208|STK38_HUMAN	sp|Q15208|STK38_HUMAN	ISO-MSMS	2	16062020_SKO_IP_Cep78	1	exp_1	489.899	3	484.557	1450.65	NaN	NaN	NaN	-0.73656	-0.00035691	NaN	NaN	NaN	NaN	NaN	9.6493	0.26995	9.6493	9.5157	9.7857	1.7764e-15								0	0	0	0.00032295
VNTLIRPDGEK	11	1	1	Unmodified	_VNTLIRPDGEK_			0	0	1	sp|P62750|RL23A_HUMAN	sp|P62750|RL23A_HUMAN	sp|P62750|RL23A_HUMAN	MULTI-MSMS		16062020_SKO_IP_Cep78	1	exp_1	414.567	3	414.566	1240.68	43004.7	0.74603	0.00030928	0.54491	0.0002259	1.2909	0.00053518	414.567	418.249	420.574	16.082	0.55605	16.082	15.674	16.23	-3.5527e-15					172	32	12	0	0	0	1.0587e-05
VPQAQPTKPALK	12	2	0	Unmodified	_VPQAQPTKPALK_			0	0	1	sp|O95793-2|STAU1_HUMAN;sp|O95793-3|STAU1_HUMAN;sp|O95793|STAU1_HUMAN	sp|O95793-2|STAU1_HUMAN	sp|O95793-2|STAU1_HUMAN	ISO-MSMS	0	16062020_SKO_IP_Cep78	1	exp_1	426.591	3	426.591	1276.75	NaN	NaN	NaN	-0.47337	-0.00020194	NaN	NaN	NaN	NaN	NaN	12.879	0.1686	12.879	12.783	12.951	0								0	0	0	0.0083265
VPVHDVTDASK	11	1	0	Unmodified	_VPVHDVTDASK_			0	0	0	sp|P21333-2|FLNA_HUMAN;sp|P21333|FLNA_HUMAN	sp|P21333-2|FLNA_HUMAN	sp|P21333-2|FLNA_HUMAN	ISO-MSMS	0	16062020_SKO_IP_Cep78	1	exp_1	389.872	3	389.872	1166.59	NaN	NaN	NaN	0.62389	0.00024324	NaN	NaN	NaN	NaN	NaN	10.221	0.20179	10.221	10.122	10.324	0								0	0	0	0.0040915
VQIQESVRGK	10	1	1	Unmodified	_VQIQESVRGK_			0	0	1	sp|O60256-3|KPRB_HUMAN;sp|O60256|KPRB_HUMAN	sp|O60256-3|KPRB_HUMAN	sp|O60256-3|KPRB_HUMAN	ISO-MSMS	0	16062020_SKO_IP_Cep78	1	exp_1	381.888	3	381.888	1142.64	NaN	NaN	NaN	-0.10167	-3.8826e-05	NaN	NaN	NaN	NaN	NaN	10.382	0.11743	10.382	10.307	10.424	0								0	0	0	0.0063879
VQVEYKGETK	10	2	0	Unmodified	_VQVEYKGETK_			0	0	1	sp|P11142|HSP7C_HUMAN;sp|P11142-2|HSP7C_HUMAN;sp|P54652|HSP72_HUMAN	sp|P11142|HSP7C_HUMAN	sp|P11142|HSP7C_HUMAN	MULTI-MSMS		16062020_SKO_IP_Cep78	1	exp_1	394.211	3	394.212	1179.61	48556	-0.079899	-3.1497e-05	0.66656	0.00026277	0.58667	0.00023127	394.211	396.895	399.555	8.9961	0.32018	8.9961	8.8291	9.1493	-1.7764e-15					98	24	7	0	0	0	0.00015972
VQVSYKGETK	10	2	0	Unmodified	_VQVSYKGETK_			0	0	1	sp|P0DMV9|HS71B_HUMAN;sp|P0DMV8|HS71A_HUMAN	sp|P0DMV9|HS71B_HUMAN	sp|P0DMV9|HS71B_HUMAN	MULTI-MSMS		16062020_SKO_IP_Cep78	1	exp_1	380.543	3	380.208	1137.6	46260.2	-0.53623	-0.00020388	0.063073	2.3981e-05	-0.47316	-0.0001799	380.208	382.892	385.551	7.8267	0.26448	7.8267	7.7251	7.9896	8.8818e-16					236	45	9	0	0	0	4.9456e-14
VQVYQEPNRETR	12	0	2	Unmodified	_VQVYQEPNRETR_			0	0	1	sp|O60256-3|KPRB_HUMAN;sp|O60256|KPRB_HUMAN	sp|O60256-3|KPRB_HUMAN	sp|O60256-3|KPRB_HUMAN	ISO-MSMS	2	16062020_SKO_IP_Cep78	1	exp_1	513.601	3	506.927	1517.76	NaN	NaN	NaN	2.7813	0.0014099	NaN	NaN	NaN	NaN	NaN	13.051	0.13462	13.051	12.968	13.103	0								0	0	0	0.00035516
VRALEESNYELEGK	14	1	1	Unmodified	_VRALEESNYELEGK_			0	0	1	sp|P13645|K1C10_HUMAN;CON__P13645;CON__P02535-1	sp|P13645|K1C10_HUMAN	sp|P13645|K1C10_HUMAN	ISO-MSMS	0	16062020_SKO_IP_Cep78	1	exp_1	546.612	3	546.277	1635.81	NaN	NaN	NaN	-1.2651	-0.0006911	NaN	NaN	NaN	NaN	NaN	23.754	1.219	23.754	23.316	24.535	0								0	0	0	1.374e-08
VRFLEQQNK	9	1	1	Unmodified	_VRFLEQQNK_			0	0	1	CON__Q5XQN5;CON__Q922U2;sp|P05787|K2C8_HUMAN;CON__P05787;sp|P05787-2|K2C8_HUMAN;CON__Q8VED5;sp|Q5XKE5|K2C79_HUMAN;CON__Q5XKE5;CON__H-INV:HIT000292931;CON__P50446;sp|O95678|K2C75_HUMAN;CON__Q8BGZ7;CON__O95678;sp|P12035|K2C3_HUMAN;CON__P12035;CON__Q01546;sp|Q8N1N4-2|K2C78_HUMAN;sp|P14136-3|GFAP_HUMAN;sp|P14136|GFAP_HUMAN;sp|P14136-2|GFAP_HUMAN;CON__Q9DCV7;sp|P08670|VIME_HUMAN;sp|P08729|K2C7_HUMAN;C…	CON__Q5XQN5;sp|P13647|K2C5_HUMAN	CON__Q5XQN5	ISO-MSMS	0	16062020_SKO_IP_Cep78	1	exp_1	388.219	3	387.884	1160.63	NaN	NaN	NaN	0.2793	0.00010834	NaN	NaN	NaN	NaN	NaN	14.538	0.15088	14.538	14.429	14.58	0								0	0	0	0.0034549
VRFLEQQNQVLQTK	14	1	1	Unmodified	_VRFLEQQNQVLQTK_			0	0	1	sp|P04264|K2C1_HUMAN;CON__P04264;CON__Q6IFZ6;sp|Q7Z794|K2C1B_HUMAN;CON__Q7Z794;CON__Q9R0H5;CON__Q6NXH9;sp|P35908|K22E_HUMAN;CON__P35908v2;CON__P35908	sp|P04264|K2C1_HUMAN;sp|P35908|K22E_HUMAN	sp|P04264|K2C1_HUMAN	ISO-MSMS	0	16062020_SKO_IP_Cep78	1	exp_1	577.996	3	577.656	1729.95	NaN	NaN	NaN	3.4702	0.0020046	NaN	NaN	NaN	NaN	NaN	32.271	0.37505	32.271	32.101	32.476	0								0	0	0	0.022307
VRGVSSESSGDREK	14	1	2	Unmodified	_VRGVSSESSGDREK_			0	0	2	sp|Q13435|SF3B2_HUMAN	sp|Q13435|SF3B2_HUMAN	sp|Q13435|SF3B2_HUMAN	MULTI-MSMS		16062020_SKO_IP_Cep78	1	exp_1	498.251	3	498.25	1491.73	39892.3	0.29389	0.00014643	-0.053939	-2.6875e-05	0.23995	0.00011956	498.25	503.605	507.593	1.274	0.28541	1.274	1.1353	1.4208	2.2204e-16					72	16	7	0	0	0	3.1716e-10
VRYSLDPENPTK	12	1	1	Unmodified	_VRYSLDPENPTK_			0	0	1	sp|P18621|RL17_HUMAN;sp|P18621-3|RL17_HUMAN	sp|P18621|RL17_HUMAN	sp|P18621|RL17_HUMAN	ISO-MSMS	0	16062020_SKO_IP_Cep78	1	exp_1	474.248	3	473.581	1417.72	NaN	NaN	NaN	0.57213	0.00027095	NaN	NaN	NaN	NaN	NaN	22.303	0.4218	22.303	22.021	22.443	-3.5527e-15								0	0	0	0.01451
VVFRDPYR	8	0	2	Unmodified	_VVFRDPYR_			0	0	1	sp|P62917|RL8_HUMAN	sp|P62917|RL8_HUMAN	sp|P62917|RL8_HUMAN	ISO-MSMS	0	16062020_SKO_IP_Cep78	1	exp_1	351.195	3	351.194	1050.56	NaN	NaN	NaN	-0.81958	-0.00028783	NaN	NaN	NaN	NaN	NaN	20.643	0.30312	20.643	20.442	20.745	0								0	0	0	0.010048
VYEGERPLTK	10	1	1	Unmodified	_VYEGERPLTK_			0	0	1	sp|P11021|GRP78_HUMAN	sp|P11021|GRP78_HUMAN	sp|P11021|GRP78_HUMAN	ISO-MSMS	0	16062020_SKO_IP_Cep78	1	exp_1	398.217	3	397.884	1190.63	NaN	NaN	NaN	-0.13987	-5.5654e-05	NaN	NaN	NaN	NaN	NaN	11.992	0.33711	11.992	11.805	12.142	0								0	0	0	0.0067489
VYSVLSDREQR	11	0	2	Unmodified	_VYSVLSDREQR_			0	0	1	sp|Q8WXX5|DNJC9_HUMAN	sp|Q8WXX5|DNJC9_HUMAN	sp|Q8WXX5|DNJC9_HUMAN	MSMS	2	16062020_SKO_IP_Cep78	1	exp_1	457.91	3	451.237	1350.69	NaN	NaN	NaN	NaN	NaN	NaN	NaN	NaN	NaN	NaN	17.702	1	17.702	17.202	18.202	0								0	0	0	0.0043649
YDSDRYRDGYR	11	0	3	Unmodified	_YDSDRYRDGYR_			0	0	2	sp|P23588|IF4B_HUMAN;sp|P23588-2|IF4B_HUMAN	sp|P23588|IF4B_HUMAN	sp|P23588|IF4B_HUMAN	ISO-MSMS	0	16062020_SKO_IP_Cep78	1	exp_1	489.22	3	489.22	1464.64	NaN	NaN	NaN	0.89683	0.00043875	NaN	NaN	NaN	NaN	NaN	10.701	0.2868	10.701	10.526	10.812	0								0	0	0	0.0072374
YEEHVREQQAQVEK	14	1	1	Unmodified	_YEEHVREQQAQVEK_			0	0	1	sp|Q13435|SF3B2_HUMAN	sp|Q13435|SF3B2_HUMAN	sp|Q13435|SF3B2_HUMAN	MULTI-MSMS		16062020_SKO_IP_Cep78	1	exp_1	591.958	3	591.624	1771.85	38141.8	-0.833	-0.00049282	-1.1341	-0.00067094	-1.9671	-0.0011638	591.958	595.305	597.964	8.5005	0.1492	8.5005	8.4264	8.5756	0					57	12	8	0	0	0	4.1421e-164
YEITEQRK	8	1	1	Unmodified	_YEITEQRK_			0	0	1	sp|Q02878|RL6_HUMAN	sp|Q02878|RL6_HUMAN	sp|Q02878|RL6_HUMAN	MSMS	0	16062020_SKO_IP_Cep78	1	exp_1	356.524	3	356.189	1065.55	NaN	NaN	NaN	NaN	NaN	NaN	NaN	NaN	NaN	NaN	7.8074	1	7.8074	7.3074	8.3074	0								0	0	0	0.0010974
YELGRPAANTK	11	1	1	Unmodified	_YELGRPAANTK_			0	0	1	sp|P62241|RS8_HUMAN	sp|P62241|RS8_HUMAN	sp|P62241|RS8_HUMAN	ISO-MSMS	2	16062020_SKO_IP_Cep78	1	exp_1	413.227	3	407.219	1218.64	NaN	NaN	NaN	-1.4232	-0.00057954	NaN	NaN	NaN	NaN	NaN	13.304	0.35309	13.304	13.086	13.439	0								0	0	0	0.0060171
YELISETGGSHDK	13	1	0	Unmodified	_YELISETGGSHDK_			0	0	0	sp|Q12906-5|ILF3_HUMAN;sp|Q12906-4|ILF3_HUMAN;sp|Q12906-2|ILF3_HUMAN;sp|Q12906-6|ILF3_HUMAN;sp|Q12906-3|ILF3_HUMAN;sp|Q12906|ILF3_HUMAN;sp|Q12906-7|ILF3_HUMAN;sp|Q96SI9-2|STRBP_HUMAN;sp|Q96SI9|STRBP_HUMAN	sp|Q12906-5|ILF3_HUMAN	sp|Q12906-5|ILF3_HUMAN	ISO-MSMS	0	16062020_SKO_IP_Cep78	1	exp_1	479.231	3	479.228	1434.66	NaN	NaN	NaN	0.57675	0.00027639	NaN	NaN	NaN	NaN	NaN	18.685	0.23564	18.685	18.572	18.807	0								0	0	0	0.0086115
YGFREGQGLGK	11	1	1	Unmodified	_YGFREGQGLGK_			0	0	1	sp|Q96I25|SPF45_HUMAN	sp|Q96I25|SPF45_HUMAN	sp|Q96I25|SPF45_HUMAN	ISO-MSMS	0	16062020_SKO_IP_Cep78	1	exp_1	404.545	3	404.544	1210.61	NaN	NaN	NaN	0.54688	0.00022124	NaN	NaN	NaN	NaN	NaN	17.603	0.30301	17.603	17.477	17.78	0								0	0	0	0.0035175
YGFREGQGLGK	11	1	1	Unmodified	_YGFREGQGLGK_			0	0	1	sp|Q96I25|SPF45_HUMAN	sp|Q96I25|SPF45_HUMAN	sp|Q96I25|SPF45_HUMAN	ISO-MSMS	2	16062020_SKO_IP_Cep78	1	exp_1	410.552	3	404.544	1210.61	NaN	NaN	NaN	0.6817	0.00027578	NaN	NaN	NaN	NaN	NaN	17.609	0.26945	17.609	17.477	17.747	0								0	0	0	0.0088113
YHPDKNPNEGEK	12	2	0	Unmodified	_YHPDKNPNEGEK_			0	0	1	sp|P31689-2|DNJA1_HUMAN;sp|P31689|DNJA1_HUMAN	sp|P31689-2|DNJA1_HUMAN	sp|P31689-2|DNJA1_HUMAN	MSMS	0	16062020_SKO_IP_Cep78	1	exp_1	476.557	3	476.557	1426.65	NaN	NaN	NaN	NaN	NaN	NaN	NaN	NaN	NaN	NaN	5.8298	1	5.8298	5.3298	6.3298	0								0	0	0	0.021154
YKAEDEVQRER	11	1	2	Unmodified	_YKAEDEVQRER_			0	0	2	sp|P0DMV9|HS71B_HUMAN;sp|P0DMV8|HS71A_HUMAN;sp|P0DMV8-2|HS71A_HUMAN	sp|P0DMV9|HS71B_HUMAN	sp|P0DMV9|HS71B_HUMAN	ISO-MSMS	0	16062020_SKO_IP_Cep78	1	exp_1	474.902	3	474.904	1421.69	NaN	NaN	NaN	-2.2391	-0.0010634	NaN	NaN	NaN	NaN	NaN	7.2451	0.19255	7.2451	7.1519	7.3444	8.8818e-16								0	0	0	0.0080178
YKAEDEVQRER	11	1	2	Unmodified	_YKAEDEVQRER_			0	0	2	sp|P0DMV9|HS71B_HUMAN;sp|P0DMV8|HS71A_HUMAN;sp|P0DMV8-2|HS71A_HUMAN	sp|P0DMV9|HS71B_HUMAN	sp|P0DMV9|HS71B_HUMAN	MSMS	1	16062020_SKO_IP_Cep78	1	exp_1	480.592	3	474.904	1421.69	NaN	NaN	NaN	NaN	NaN	NaN	NaN	NaN	NaN	NaN	7.2123	1	7.2123	6.7123	7.7123	0								0	0	0	0.0022033
YKAEDEVQRER	11	1	2	Unmodified	_YKAEDEVQRER_			0	0	2	sp|P0DMV9|HS71B_HUMAN;sp|P0DMV8|HS71A_HUMAN;sp|P0DMV8-2|HS71A_HUMAN	sp|P0DMV9|HS71B_HUMAN	sp|P0DMV9|HS71B_HUMAN	MSMS	1	16062020_SKO_IP_Cep78	1	exp_1	480.26	3	474.904	1421.69	NaN	NaN	NaN	NaN	NaN	NaN	NaN	NaN	NaN	NaN	7.2542	1	7.2542	6.7542	7.7542	0								0	0	0	9.7773e-06
YKPLDLRPK	9	2	1	Unmodified	_YKPLDLRPK_			0	0	2	sp|P42766|RL35_HUMAN	sp|P42766|RL35_HUMAN	sp|P42766|RL35_HUMAN	MULTI-MSMS		16062020_SKO_IP_Cep78	1	exp_1	377.23	3	377.229	1128.67	44104.2	2.3345	0.00088065	-0.033816	-1.2756e-05	2.3007	0.00086789	377.229	381.919	385.908	17.607	0.32054	17.607	17.426	17.747	0					154	17	12	0	0	0	2.1751e-37
YNHFLAIHQR	10	0	1	Unmodified	_YNHFLAIHQR_			0	0	0	sp|O43167-2|ZBT24_HUMAN;sp|O43167|ZBT24_HUMAN	sp|O43167-2|ZBT24_HUMAN	sp|O43167-2|ZBT24_HUMAN	ISO-MSMS	0	16062020_SKO_IP_Cep78	1	exp_1	433.899	3	433.563	1297.67	NaN	NaN	NaN	1.3807	0.00059862	NaN	NaN	NaN	NaN	NaN	16.71	0.18532	16.71	16.584	16.769	0								0	0	0	4.0944e-05
YYLHDDREGEGSDK	14	1	1	Unmodified	_YYLHDDREGEGSDK_			0	0	1	sp|Q9Y2W1|TR150_HUMAN	sp|Q9Y2W1|TR150_HUMAN	sp|Q9Y2W1|TR150_HUMAN	ISO-MSMS	2	16062020_SKO_IP_Cep78	1	exp_1	567.921	3	561.913	1682.72	NaN	NaN	NaN	0.89871	0.000505	NaN	NaN	NaN	NaN	NaN	10.933	0.52845	10.933	10.678	11.206	0								0	0	0	0.010306
YYLHDDREGEGSDK	14	1	1	Unmodified	_YYLHDDREGEGSDK_			0	0	1	sp|Q9Y2W1|TR150_HUMAN	sp|Q9Y2W1|TR150_HUMAN	sp|Q9Y2W1|TR150_HUMAN	MSMS	1	16062020_SKO_IP_Cep78	1	exp_1	565.258	3	561.913	1682.72	NaN	NaN	NaN	NaN	NaN	NaN	NaN	NaN	NaN	NaN	10.806	1	10.806	10.306	11.306	0								0	0	0	0.011638
YYLHDDREGEGSDK	14	1	1	Unmodified	_YYLHDDREGEGSDK_			0	0	1	sp|Q9Y2W1|TR150_HUMAN	sp|Q9Y2W1|TR150_HUMAN	sp|Q9Y2W1|TR150_HUMAN	MSMS	1	16062020_SKO_IP_Cep78	1	exp_1	565.265	3	561.913	1682.72	NaN	NaN	NaN	NaN	NaN	NaN	NaN	NaN	NaN	NaN	10.844	1	10.844	10.344	11.344	0								0	0	0	0.00016503
YYPTEDVPRK	10	1	1	Unmodified	_YYPTEDVPRK_			0	0	1	sp|Q02878|RL6_HUMAN	sp|Q02878|RL6_HUMAN	sp|Q02878|RL6_HUMAN	ISO-MSMS	0	16062020_SKO_IP_Cep78	1	exp_1	423.215	3	423.215	1266.62	NaN	NaN	NaN	0.24055	0.0001018	NaN	NaN	NaN	NaN	NaN	16.253	0.26887	16.253	16.096	16.365	3.5527e-15								0	0	0	0.022829
DGLIIRKPVTVHSR	14	1	2	Unmodified	_DGLIIRKPVTVHSR_			0	0	2	sp|P84098|RL19_HUMAN	sp|P84098|RL19_HUMAN	sp|P84098|RL19_HUMAN	MULTI-MSMS		16062020_SKO_IP_Cep78	1	exp_1	398.493	4	398.491	1589.94	44339.9	2.2513	0.00089711	0.21412	8.5324e-05	2.4654	0.00098243	398.492	402.508	405.499	17.596	0.25266	17.596	17.477	17.73	0					98	14	11	0	0	0	8.5488e-06
DQNYPGAIAIHHPNVAEK	18	1	0	Unmodified	_DQNYPGAIAIHHPNVAEK_			0	0	0	CON__P15636	CON__P15636	CON__P15636	ISO-MSMS	0	16062020_SKO_IP_Cep78	1	exp_1	494.503	4	494.251	1972.98	NaN	NaN	NaN	-0.34824	-0.00017212	NaN	NaN	NaN	NaN	NaN	27.296	0.77615	27.296	26.955	27.732	0								0	0	0	0.0038036
EALIRHQQLSGLHK	14	1	1	Unmodified	_EALIRHQQLSGLHK_			0	0	1	sp|P98175-2|RBM10_HUMAN;sp|P98175|RBM10_HUMAN;sp|P98175-4|RBM10_HUMAN;sp|P98175-3|RBM10_HUMAN	sp|P98175-2|RBM10_HUMAN	sp|P98175-2|RBM10_HUMAN	MULTI-MSMS		16062020_SKO_IP_Cep78	1	exp_1	408.237	4	408.235	1628.91	43055.1	2.9435	0.0012017	0.79748	0.00032556	3.741	0.0015272	408.236	410.997	412.741	15.627	0.26998	15.627	15.489	15.759	-1.7764e-15					92	15	12	0	0	0	0.000399
EHHFGSSGMTLHER	14	0	1	Oxidation (M)	_EHHFGSSGM(ox)TLHER_	EHHFGSSGM(1)TLHER	EHHFGSSGM(105.41)TLHER	0	1	0	sp|Q9Y2W1|TR150_HUMAN	sp|Q9Y2W1|TR150_HUMAN	sp|Q9Y2W1|TR150_HUMAN	MULTI-MSMS		16062020_SKO_IP_Cep78	1	exp_1	410.936	4	410.936	1639.72	44681.9	0.74839	0.00030754	-0.52511	-0.00021579	0.22328	9.1754e-05	411.187	412.441	413.438	6.768	0.28332	6.768	6.6032	6.8865	8.8818e-16					86	16	10	0	0	0	3.0049e-16
ERHPGSFDVVHVK	13	1	1	Unmodified	_ERHPGSFDVVHVK_			0	0	1	sp|P62701|RS4X_HUMAN;sp|P22090|RS4Y1_HUMAN	sp|P62701|RS4X_HUMAN	sp|P62701|RS4X_HUMAN	ISO-MSMS	2	16062020_SKO_IP_Cep78	1	exp_1	381.958	4	377.451	1505.77	NaN	NaN	NaN	0.52059	0.0001965	NaN	NaN	NaN	NaN	NaN	16.788	0.2528	16.788	16.651	16.904	0								0	0	0	8.9489e-06
ERHPGSFDVVHVK	13	1	1	Unmodified	_ERHPGSFDVVHVK_			0	0	1	sp|P62701|RS4X_HUMAN;sp|P22090|RS4Y1_HUMAN	sp|P62701|RS4X_HUMAN	sp|P62701|RS4X_HUMAN	ISO-MSMS	0	16062020_SKO_IP_Cep78	1	exp_1	377.703	4	377.451	1505.77	NaN	NaN	NaN	0.97597	0.00036838	NaN	NaN	NaN	NaN	NaN	16.779	0.26958	16.779	16.651	16.921	0								0	0	0	0.00020209
GATYGKPVHHGVNQLK	16	2	0	Unmodified	_GATYGKPVHHGVNQLK_			0	0	1	sp|P61313|RL15_HUMAN;sp|P61313-2|RL15_HUMAN	sp|P61313|RL15_HUMAN	sp|P61313|RL15_HUMAN	ISO-MSMS	0	16062020_SKO_IP_Cep78	1	exp_1	427.233	4	427.234	1704.91	NaN	NaN	NaN	-0.76774	-0.000328	NaN	NaN	NaN	NaN	NaN	6.4657	0.15085	6.4657	6.4019	6.5527	0								0	0	0	0.0012536
KTTHFVEGGDAGNREDQINR	20	1	2	Unmodified	_KTTHFVEGGDAGNREDQINR_			0	0	2	sp|P18124|RL7_HUMAN	sp|P18124|RL7_HUMAN	sp|P18124|RL7_HUMAN	ISO-MSMS	2	16062020_SKO_IP_Cep78	1	exp_1	569.033	4	561.774	2243.07	NaN	NaN	NaN	-1.0943	-0.00061476	NaN	NaN	NaN	NaN	NaN	12.84	0.20291	12.84	12.748	12.951	0								0	0	0	7.3227e-20
LTGVFAPRPSTGPHK	15	1	1	Unmodified	_LTGVFAPRPSTGPHK_			0	0	1	sp|P62701|RS4X_HUMAN;sp|Q8TD47|RS4Y2_HUMAN;sp|P22090|RS4Y1_HUMAN	sp|P62701|RS4X_HUMAN	sp|P62701|RS4X_HUMAN	ISO-MSMS	2	16062020_SKO_IP_Cep78	1	exp_1	396.476	4	391.97	1563.85	NaN	NaN	NaN	0.18585	7.2848e-05	NaN	NaN	NaN	NaN	NaN	17.508	0.20297	17.508	17.41	17.613	0								0	0	0	0.012206
MHDFNRDLRER	11	0	3	Oxidation (M)	_M(ox)HDFNRDLRER_	M(1)HDFNRDLRER	M(68.44)HDFNRDLRER	0	1	2	sp|Q4VCS5-2|AMOT_HUMAN;sp|Q4VCS5|AMOT_HUMAN	sp|Q4VCS5-2|AMOT_HUMAN	sp|Q4VCS5-2|AMOT_HUMAN	ISO-MSMS	1	16062020_SKO_IP_Cep78	1	exp_1	381.447	4	376.932	1503.7	NaN	NaN	NaN	-1.3737	-0.0005178	NaN	NaN	NaN	NaN	NaN	10.419	0.25233	10.419	10.29	10.542	0								0	0	0	0.0035998
PVDTAAREREVEER	14	0	3	Unmodified	_PVDTAAREREVEER_			0	0	2	sp|P23588|IF4B_HUMAN;sp|P23588-2|IF4B_HUMAN	sp|P23588|IF4B_HUMAN	sp|P23588|IF4B_HUMAN	MULTI-MSMS		16062020_SKO_IP_Cep78	1	exp_1	414.964	4	414.963	1655.82	42918	0.9523	0.00039517	-0.3333	-0.00013831	0.61901	0.00025687	414.963	419.478	422.469	10.704	0.23644	10.704	10.593	10.829	0					97	13	13	0	0	0	1.9722e-16
QNEEIEAMAAIYGEEWCVIDDCAK	24	1	0	Unmodified	_QNEEIEAMAAIYGEEWCVIDDCAK_			0	0	0	sp|Q9P2X3|IMPCT_HUMAN	sp|Q9P2X3|IMPCT_HUMAN	sp|Q9P2X3|IMPCT_HUMAN	ISO-MSMS	0	16062020_SKO_IP_Cep78	1	exp_1	712.065	4	711.809	2843.21	NaN	NaN	NaN	7.8353	0.0055773	NaN	NaN	NaN	NaN	NaN	13.268	0.13427	13.268	13.204	13.338	0								0	0	0	0.0035683
RDQNYPGAIAIHHPNVAEK	19	1	1	Unmodified	_RDQNYPGAIAIHHPNVAEK_			0	0	1	CON__P15636	CON__P15636	CON__P15636	ISO-MSMS	0	16062020_SKO_IP_Cep78	1	exp_1	533.528	4	533.276	2129.08	NaN	NaN	NaN	-0.28919	-0.00015422	NaN	NaN	NaN	NaN	NaN	20.145	0.92644	20.145	19.869	20.795	0								0	0	0	4.8948e-05
RHPYFYAPELLYYANK	16	1	1	Unmodified	_RHPYFYAPELLYYANK_			0	0	1	CON__P02769	CON__P02769	CON__P02769	ISO-MSMS	0	16062020_SKO_IP_Cep78	1	exp_1	512.515	4	512.012	2044.02	NaN	NaN	NaN	0.73547	0.00037657	NaN	NaN	NaN	NaN	NaN	66.637	1.2045	66.637	65.969	67.174	0								0	0	0	0.0018847
RPNPDILDHERK	12	1	2	Unmodified	_RPNPDILDHERK_			0	0	2	sp|Q9UQ35|SRRM2_HUMAN;sp|Q9UQ35-2|SRRM2_HUMAN	sp|Q9UQ35|SRRM2_HUMAN	sp|Q9UQ35|SRRM2_HUMAN	ISO-MSMS	0	16062020_SKO_IP_Cep78	1	exp_1	373.202	4	373.202	1488.78	NaN	NaN	NaN	-0.14821	-5.5311e-05	NaN	NaN	NaN	NaN	NaN	11.842	0.26932	11.842	11.738	12.007	0								0	0	0	0.0049032
RQPAPPREAHFVR	13	0	3	Unmodified	_RQPAPPREAHFVR_			0	0	2	sp|P46778|RL21_HUMAN	sp|P46778|RL21_HUMAN	sp|P46778|RL21_HUMAN	ISO-MSMS	0	16062020_SKO_IP_Cep78	1	exp_1	390.968	4	390.968	1559.84	NaN	NaN	NaN	-0.19381	-7.5774e-05	NaN	NaN	NaN	NaN	NaN	10.705	0.21966	10.705	10.559	10.779	0								0	0	0	0.0054238
RSEGGHRGFVPEK	13	1	2	Unmodified	_RSEGGHRGFVPEK_			0	0	2	sp|Q9Y2W1|TR150_HUMAN	sp|Q9Y2W1|TR150_HUMAN	sp|Q9Y2W1|TR150_HUMAN	MULTI-MSMS		16062020_SKO_IP_Cep78	1	exp_1	364.943	4	364.692	1454.74	45095.7	0.53761	0.00019606	0.38109	0.00013898	0.91869	0.00033504	364.692	368.708	371.7	6.1757	0.13404	6.1757	6.0668	6.2009	0					27	7	9	0	0	0	1.1969e-08
SHCIAEVEKDAIPENLPPLTADFAEDKDVCK	31	3	0	Unmodified	_SHCIAEVEKDAIPENLPPLTADFAEDKDVCK_			0	0	2	CON__P02769	CON__P02769	CON__P02769	ISO-MSMS	0	16062020_SKO_IP_Cep78	1	exp_1	878.926	4	878.673	3510.66	NaN	NaN	NaN	0.61509	0.00054046	NaN	NaN	NaN	NaN	NaN	67.046	0.54817	67.046	66.733	67.281	0								0	0	0	8.749e-09
TDGPVFHSNTLERK	14	1	1	Unmodified	_TDGPVFHSNTLERK_			0	0	1	sp|Q4VCS5-2|AMOT_HUMAN;sp|Q4VCS5|AMOT_HUMAN	sp|Q4VCS5-2|AMOT_HUMAN	sp|Q4VCS5-2|AMOT_HUMAN	ISO-MSMS	1	16062020_SKO_IP_Cep78	1	exp_1	403.468	4	400.957	1599.8	NaN	NaN	NaN	-1.6259	-0.00065191	NaN	NaN	NaN	NaN	NaN	16.459	0.43776	16.459	16.264	16.702	0								0	0	0	0.00058474
TTHFVEGGDAGNREDQINR	19	0	2	Unmodified	_TTHFVEGGDAGNREDQINR_			0	0	1	sp|P18124|RL7_HUMAN	sp|P18124|RL7_HUMAN	sp|P18124|RL7_HUMAN	ISO-MSMS	0	16062020_SKO_IP_Cep78	1	exp_1	530.002	4	529.751	2114.97	NaN	NaN	NaN	0.68805	0.0003645	NaN	NaN	NaN	NaN	NaN	15.553	0.18518	15.553	15.456	15.641	1.7764e-15								0	0	0	9.6608e-34
TTHFVEGGDAGNREDQINR	19	0	2	Unmodified	_TTHFVEGGDAGNREDQINR_			0	0	1	sp|P18124|RL7_HUMAN	sp|P18124|RL7_HUMAN	sp|P18124|RL7_HUMAN	ISO-MSMS	2	16062020_SKO_IP_Cep78	1	exp_1	535.007	4	529.751	2114.97	NaN	NaN	NaN	1.1908	0.00063082	NaN	NaN	NaN	NaN	NaN	15.537	0.18518	15.537	15.456	15.641	0								0	0	0	5.4855e-52
VAPAQPSEEGPGRKDENK	18	2	1	Unmodified	_VAPAQPSEEGPGRKDENK_			0	0	2	sp|P23588|IF4B_HUMAN;sp|P23588-2|IF4B_HUMAN	sp|P23588|IF4B_HUMAN	sp|P23588|IF4B_HUMAN	MULTI-MSMS		16062020_SKO_IP_Cep78	1	exp_1	477.991	4	477.991	1907.93	40322	0.65588	0.00031351	-0.10846	-5.1843e-05	0.54742	0.00026166	477.991	481.758	484.75	6.4097	0.25136	6.4097	6.3014	6.5527	0					95	14	11	0	0	0	4.7645e-05
YEEHVREQQAQVEK	14	1	1	Unmodified	_YEEHVREQQAQVEK_			0	0	1	sp|Q13435|SF3B2_HUMAN	sp|Q13435|SF3B2_HUMAN	sp|Q13435|SF3B2_HUMAN	ISO-MSMS	0	16062020_SKO_IP_Cep78	1	exp_1	444.471	4	443.97	1771.85	NaN	NaN	NaN	-1.0832	-0.00048092	NaN	NaN	NaN	NaN	NaN	8.512	0.086431	8.512	8.4579	8.5443	0								0	0	0	0.0067534
QWSKQVVPFVYQTIVK	16	2	0	Unmodified	_QWSKQVVPFVYQTIVK_			0	0	1	sp|Q8IZH2-2|XRN1_HUMAN;sp|Q8IZH2|XRN1_HUMAN	sp|Q8IZH2-2|XRN1_HUMAN	sp|Q8IZH2-2|XRN1_HUMAN	ISO-MSMS	0	16062020_SKO_IP_Cep78	1	exp_1	391.025	5	390.823	1949.08	NaN	NaN	NaN	1.0331	0.00040375	NaN	NaN	NaN	NaN	NaN	9.6165	0.15144	9.6165	9.5325	9.684	-1.7764e-15								0	0	0	0.0070765
SFNMPSLDKMDGSMPSEMESSRNDTK	26	2	1	2 Oxidation (M)	_SFNM(ox)PSLDKM(ox)DGSMPSEMESSRNDTK_	SFNM(0.976)PSLDKM(0.976)DGSM(0.024)PSEM(0.024)ESSRNDTK	SFNM(20.76)PSLDKM(20.76)DGSM(-20.76)PSEM(-20.76)ESSRNDTK	0	2	2	sp|O15320-8|CTGE5_HUMAN;sp|O15320-6|CTGE5_HUMAN;sp|O15320-7|CTGE5_HUMAN;sp|Q96RT6|CTGE2_HUMAN;sp|O15320-2|CTGE5_HUMAN;sp|O15320-4|CTGE5_HUMAN;sp|O15320-3|CTGE5_HUMAN;sp|O15320-10|CTGE5_HUMAN;sp|O15320|CTGE5_HUMAN;sp|O15320-5|CTGE5_HUMAN;sp|Q96PC5|MIA2_HUMAN	sp|O15320-8|CTGE5_HUMAN	sp|O15320-8|CTGE5_HUMAN	ISO-MSMS	0	16062020_SKO_IP_Cep78	1	exp_1	591.853	5	591.452	2952.22	NaN	NaN	NaN	-1.2942	-0.00076547	NaN	NaN	NaN	NaN	NaN	31.893	1.0402	31.893	31.706	32.746	-3.5527e-15								0	0	0	1.5371e-05
[truncated: 28 more columns]

## Sheet: Plot
Modifications	Modified sequence	Oxidation (M) Probabilities	Oxidation (M) Score Diffs	Acetyl (Protein N-term)	Oxidation (M)	Missed cleavages	Proteins	Leading proteins	Leading razor protein	Type	Labeling State	Raw file	Fraction	Experiment	MS/MS m/z	Charge	m/z	Mass	Resolution	Uncalibrated - Calibrated m/z [ppm]	Uncalibrated - Calibrated m/z [Da]	Mass error [ppm]	Mass error [Da]	Uncalibrated mass error [ppm]	Uncalibrated mass error [Da]	Max intensity m/z 0	Max intensity m/z 1	Max intensity m/z 2	Retention time	Retention length	Calibrated retention time	Calibrated retention time start	Calibrated retention time finish	Retention time calibration	Match time difference	Match m/z difference	Match q-value	Match score	Number of data points	Number of scans	Number of isotopic peaks	PIF	Fraction of total spectrum	Base peak fraction	PEP	MS/MS count	MS/MS scan number	Score	Delta score
Unmodified	_SSLHLLSHETK_			0	0	0	sp|O95684-2|FR1OP_HUMAN;sp|O95684|FR1OP_HUMAN	sp|O95684-2|FR1OP_HUMAN	sp|O95684-2|FR1OP_HUMAN	ISO-MSMS	0	16062020_SKO_IP_Cep78	1	exp_1	417.895	3	417.895	1250.66	NaN	NaN	NaN	-0.097665	-4.0814e-05	NaN	NaN	NaN	NaN	NaN	13.527	0.28539	13.527	13.355	13.64	1.7764e-15								0	0	0	6.2247e-06	1	9255	143.22	110.69
Unmodified	_SSLHLLSHETK_			0	0	0	sp|O95684-2|FR1OP_HUMAN;sp|O95684|FR1OP_HUMAN	sp|O95684-2|FR1OP_HUMAN	sp|O95684-2|FR1OP_HUMAN	ISO-MSMS	2	16062020_SKO_IP_Cep78	1	exp_1	420.567	3	417.895	1250.66	NaN	NaN	NaN	2.285	0.00095491	NaN	NaN	NaN	NaN	NaN	13.503	0.38607	13.503	13.271	13.657	0								0	0	0	0.00025415	1	9346	105.36	69.765
Unmodified	_VVEELTR_			0	0	0	sp|Q16531|DDB1_HUMAN;sp|Q16531-2|DDB1_HUMAN	sp|Q16531|DDB1_HUMAN	sp|Q16531|DDB1_HUMAN	ISO-MSMS	0	16062020_SKO_IP_Cep78	1	exp_1	423.24	2	423.24	844.465	NaN	NaN	NaN	-0.21216	-8.9793e-05	NaN	NaN	NaN	NaN	NaN	14.945	0.29476	14.945	14.865	15.16	0								0	0	0	0.015425	1	10424	138.85	49.725
Unmodified	_VIPLDRDNK_			0	0	1	sp|Q16531|DDB1_HUMAN	sp|Q16531|DDB1_HUMAN	sp|Q16531|DDB1_HUMAN	ISO-MSMS	0	16062020_SKO_IP_Cep78	1	exp_1	357.205	3	357.205	1068.59	NaN	NaN	NaN	0.34516	0.00012329	NaN	NaN	NaN	NaN	NaN	14.034	0.62086	14.034	13.758	14.379	-1.7764e-15								0	0	0	0.0068923	1	9656	79.059	62.283
Unmodified	_GLGETATVLTK_			0	0	0	sp|Q9Y4B6-3|VPRBP_HUMAN;sp|Q9Y4B6-2|VPRBP_HUMAN;sp|Q9Y4B6|VPRBP_HUMAN	sp|Q9Y4B6-3|VPRBP_HUMAN	sp|Q9Y4B6-3|VPRBP_HUMAN	ISO-MSMS	0	16062020_SKO_IP_Cep78	1	exp_1	545.813	2	545.311	1088.61	NaN	NaN	NaN	0.76738	0.00041846	NaN	NaN	NaN	NaN	NaN	28.247	0.31725	28.247	28.002	28.319	0								0	0	0	0.0062473	2	20499	116.3	68.456
Unmodified	_SPFGSSFR_			0	0	0	sp|Q9Y4B6-3|VPRBP_HUMAN;sp|Q9Y4B6-2|VPRBP_HUMAN;sp|Q9Y4B6|VPRBP_HUMAN	sp|Q9Y4B6-3|VPRBP_HUMAN	sp|Q9Y4B6-3|VPRBP_HUMAN	ISO-MSMS	0	16062020_SKO_IP_Cep78	1	exp_1	442.718	2	442.717	883.419	NaN	NaN	NaN	-1.339	-0.0005928	NaN	NaN	NaN	NaN	NaN	24.436	0.50837	24.436	24.161	24.669	0								0	0	0	0.012669	1	17478	105.25	66.431
Acetyl (Protein N-term)	_(ac)TTVVVHVDSK_			1	0	0	sp|Q9Y4B6-3|VPRBP_HUMAN;sp|Q9Y4B6-2|VPRBP_HUMAN;sp|Q9Y4B6|VPRBP_HUMAN	sp|Q9Y4B6-3|VPRBP_HUMAN	sp|Q9Y4B6-3|VPRBP_HUMAN	MSMS	2	16062020_SKO_IP_Cep78	1	exp_1	567.817	2	563.809	1125.6	NaN	NaN	NaN	NaN	NaN	NaN	NaN	NaN	NaN	NaN	26.984	1	26.984	26.484	27.484	0								0	0	0	0.024553	1	19575	78.655	52.918
Unmodified	_YAAELIER_			0	0	0	sp|Q9Y4B6-3|VPRBP_HUMAN;sp|Q9Y4B6-2|VPRBP_HUMAN;sp|Q9Y4B6|VPRBP_HUMAN	sp|Q9Y4B6-3|VPRBP_HUMAN	sp|Q9Y4B6-3|VPRBP_HUMAN	ISO-MSMS	0	16062020_SKO_IP_Cep78	1	exp_1	482.756	2	482.759	963.503	NaN	NaN	NaN	-6.1496	-0.0029688	NaN	NaN	NaN	NaN	NaN	25.321	0.15205	25.321	25.263	25.415	3.5527e-15								0	0	0	0.0099155	1	18288	113.14	48.569
Unmodified	_GDIAHIYDIQTGNK_			0	0	0	sp|Q9Y4B6-3|VPRBP_HUMAN;sp|Q9Y4B6-2|VPRBP_HUMAN;sp|Q9Y4B6|VPRBP_HUMAN	sp|Q9Y4B6-3|VPRBP_HUMAN	sp|Q9Y4B6-3|VPRBP_HUMAN	ISO-MSMS	2	16062020_SKO_IP_Cep78	1	exp_1	518.602	3	515.595	1543.76	NaN	NaN	NaN	1.0711	0.00055223	NaN	NaN	NaN	NaN	NaN	35.226	0.2896	35.226	35.109	35.399	0								0	0	0	0.025718	1	25762	46.41	38.866
Unmodified	_HSFTEDHYVEFSK_			0	0	0	sp|Q9Y4B6-3|VPRBP_HUMAN;sp|Q9Y4B6-2|VPRBP_HUMAN;sp|Q9Y4B6|VPRBP_HUMAN	sp|Q9Y4B6-3|VPRBP_HUMAN	sp|Q9Y4B6-3|VPRBP_HUMAN	ISO-MSMS	0	16062020_SKO_IP_Cep78	1	exp_1	542.579	3	542.579	1624.72	NaN	NaN	NaN	0.71724	0.00038916	NaN	NaN	NaN	NaN	NaN	26.668	0.237	26.668	26.549	26.786	0								0	0	0	0.020219	1	19325	36.638	17.805
Unmodified	_SDHGAYSQSPAIK_			0	0	0	sp|Q9Y4B6-3|VPRBP_HUMAN;sp|Q9Y4B6-2|VPRBP_HUMAN;sp|Q9Y4B6|VPRBP_HUMAN	sp|Q9Y4B6-3|VPRBP_HUMAN	sp|Q9Y4B6-3|VPRBP_HUMAN	ISO-MSMS	0	16062020_SKO_IP_Cep78	1	exp_1	454.22	3	454.221	1359.64	NaN	NaN	NaN	-0.56156	-0.00025507	NaN	NaN	NaN	NaN	NaN	11.214	0.40349	11.214	11.049	11.453	1.7764e-15								0	0	0	2.1217e-14	1	7467	158.34	143
Unmodified	_AAHQSSLLR_			0	0	0	sp|Q5VT06|CE350_HUMAN	sp|Q5VT06|CE350_HUMAN	sp|Q5VT06|CE350_HUMAN	ISO-MSMS	0	16062020_SKO_IP_Cep78	1	exp_1	491.776	2	491.775	981.536	NaN	NaN	NaN	1.8127	0.00089143	NaN	NaN	NaN	NaN	NaN	6.5443	0.083832	6.5443	6.5024	6.5863	0								0	0	0	0.015709	1	4270	110.55	49.765
Unmodified	_AEQEALESQR_			0	0	0	sp|Q5VT06|CE350_HUMAN	sp|Q5VT06|CE350_HUMAN	sp|Q5VT06|CE350_HUMAN	MSMS	0	16062020_SKO_IP_Cep78	1	exp_1	580.781	2	580.781	1159.55	NaN	NaN	NaN	NaN	NaN	NaN	NaN	NaN	NaN	NaN	9.7499	1	9.7499	9.2499	10.25	0								0	0	0	0.00040164	1	6403	102.55	58.57
Unmodified	_ATAASLSSR_			0	0	0	sp|Q5VT06|CE350_HUMAN	sp|Q5VT06|CE350_HUMAN	sp|Q5VT06|CE350_HUMAN	MSMS	0	16062020_SKO_IP_Cep78	1	exp_1	432.232	2	432.233	862.451	NaN	NaN	NaN	NaN	NaN	NaN	NaN	NaN	NaN	NaN	6.6244	1	6.6244	6.1244	7.1244	0								0	0	0	0.0089916	1	4316	96.027	51.306
Unmodified	_DDNEDVFSAR_			0	0	0	sp|Q5VT06|CE350_HUMAN	sp|Q5VT06|CE350_HUMAN	sp|Q5VT06|CE350_HUMAN	ISO-MSMS	0	16062020_SKO_IP_Cep78	1	exp_1	584.251	2	584.249	1166.48	NaN	NaN	NaN	1.9388	0.0011327	NaN	NaN	NaN	NaN	NaN	26.125	0.47449	26.125	25.94	26.414	0								0	0	0	0.021693	1	18812	90.15	49.799
Unmodified	_DLPLDSENVQK_			0	0	0	sp|Q5VT06|CE350_HUMAN	sp|Q5VT06|CE350_HUMAN	sp|Q5VT06|CE350_HUMAN	MSMS	0	16062020_SKO_IP_Cep78	1	exp_1	629.319	2	629.32	1256.62	NaN	NaN	NaN	NaN	NaN	NaN	NaN	NaN	NaN	NaN	29.927	1	29.927	29.427	30.427	0								0	0	0	0.0075979	1	21711	96.668	52.273
Unmodified	_DTVNQLQQIK_			0	0	0	sp|Q5VT06|CE350_HUMAN	sp|Q5VT06|CE350_HUMAN	sp|Q5VT06|CE350_HUMAN	ISO-MSMS	2	16062020_SKO_IP_Cep78	1	exp_1	597.834	2	593.825	1185.64	NaN	NaN	NaN	0.029244	1.7366e-05	NaN	NaN	NaN	NaN	NaN	26.421	0.27121	26.421	26.261	26.533	0								0	0	0	0.0090464	1	19083	107.01	64.611
Unmodified	_GLDIESTSK_			0	0	0	sp|Q5VT06|CE350_HUMAN	sp|Q5VT06|CE350_HUMAN	sp|Q5VT06|CE350_HUMAN	ISO-MSMS	0	16062020_SKO_IP_Cep78	1	exp_1	475.247	2	475.245	948.476	NaN	NaN	NaN	-0.47745	-0.00022691	NaN	NaN	NaN	NaN	NaN	17.301	0.23618	17.301	17.173	17.41	0								0	0	0	0.025081	1	12185	92.439	46.014
Unmodified	_ILGPAPR_			0	0	0	sp|Q5VT06|CE350_HUMAN	sp|Q5VT06|CE350_HUMAN	sp|Q5VT06|CE350_HUMAN	ISO-MSMS	0	16062020_SKO_IP_Cep78	1	exp_1	362.23	2	362.229	722.444	NaN	NaN	NaN	-0.62823	-0.00022756	NaN	NaN	NaN	NaN	NaN	14.29	0.20123	14.29	14.211	14.413	0								0	0	0	0.027111	1	9898	120.76	22.725
Unmodified	_ITANEDPPVISK_			0	0	0	sp|Q5VT06|CE350_HUMAN	sp|Q5VT06|CE350_HUMAN	sp|Q5VT06|CE350_HUMAN	ISO-MSMS	0	16062020_SKO_IP_Cep78	1	exp_1	642.348	2	642.346	1282.68	NaN	NaN	NaN	2.0168	0.0012955	NaN	NaN	NaN	NaN	NaN	23.464	0.20263	23.464	23.4	23.602	0								0	0	0	0.00081215	1	16865	105.46	56.666
Unmodified	_LASSLPDNK_			0	0	0	sp|Q5VT06|CE350_HUMAN	sp|Q5VT06|CE350_HUMAN	sp|Q5VT06|CE350_HUMAN	ISO-MSMS	0	16062020_SKO_IP_Cep78	1	exp_1	472.757	2	472.756	943.497	NaN	NaN	NaN	-0.18886	-8.9287e-05	NaN	NaN	NaN	NaN	NaN	14.131	0.20155	14.131	14.027	14.228	-1.7764e-15								0	0	0	6.7635e-11	1	9763	163.04	104.22
Unmodified	_NPNNLDEIK_			0	0	0	sp|Q5VT06|CE350_HUMAN	sp|Q5VT06|CE350_HUMAN	sp|Q5VT06|CE350_HUMAN	ISO-MSMS	2	16062020_SKO_IP_Cep78	1	exp_1	532.777	2	528.77	1055.52	NaN	NaN	NaN	-1.7058	-0.00090199	NaN	NaN	NaN	NaN	NaN	16.939	0.20276	16.939	16.836	17.039	0								0	0	0	0.015262	1	11934	100.02	74.927
Unmodified	_QDTVELQNQK_			0	0	0	sp|Q5VT06|CE350_HUMAN	sp|Q5VT06|CE350_HUMAN	sp|Q5VT06|CE350_HUMAN	ISO-MSMS	2	16062020_SKO_IP_Cep78	1	exp_1	605.813	2	601.804	1201.59	NaN	NaN	NaN	3.3021	0.0019872	NaN	NaN	NaN	NaN	NaN	13.058	0.18514	13.058	12.951	13.136	0								0	0	0	0.013025	1	8966	125.98	91.808
Unmodified	_SPSVSLSQSK_			0	0	0	sp|Q5VT06|CE350_HUMAN	sp|Q5VT06|CE350_HUMAN	sp|Q5VT06|CE350_HUMAN	ISO-MSMS	2	16062020_SKO_IP_Cep78	1	exp_1	514.28	2	510.272	1018.53	NaN	NaN	NaN	1.7088	0.00087198	NaN	NaN	NaN	NaN	NaN	14.163	0.28541	14.163	14.01	14.295	0								0	0	0	0.020609	1	9765	91.584	42.225
Unmodified	_SPSVSLSQSK_			0	0	0	sp|Q5VT06|CE350_HUMAN	sp|Q5VT06|CE350_HUMAN	sp|Q5VT06|CE350_HUMAN	ISO-MSMS	0	16062020_SKO_IP_Cep78	1	exp_1	510.273	2	510.272	1018.53	NaN	NaN	NaN	1.3786	0.00070347	NaN	NaN	NaN	NaN	NaN	14.166	0.38599	14.166	14.027	14.413	1.7764e-15								0	0	0	0.021281	1	9775	90.696	21.781
Unmodified	_AALRHIENK_			0	0	1	sp|Q5VT06|CE350_HUMAN	sp|Q5VT06|CE350_HUMAN	sp|Q5VT06|CE350_HUMAN	ISO-MSMS	0	16062020_SKO_IP_Cep78	1	exp_1	351.54	3	351.205	1050.59	NaN	NaN	NaN	1.0043	0.00035271	NaN	NaN	NaN	NaN	NaN	0.89546	0.23561	0.89546	0.76475	1.0004	0								0	0	0	0.026872	1	699	62.536	31.972
Unmodified	_IKPLTPLHR_			0	0	1	sp|Q5VT06|CE350_HUMAN	sp|Q5VT06|CE350_HUMAN	sp|Q5VT06|CE350_HUMAN	ISO-MSMS	0	16062020_SKO_IP_Cep78	1	exp_1	358.899	3	358.898	1073.67	NaN	NaN	NaN	1.1511	0.00041311	NaN	NaN	NaN	NaN	NaN	14.224	0.15121	14.224	14.127	14.279	0								0	0	0	0.0037932	1	9855	93.649	68.175
Unmodified	_IKPLTPLHR_			0	0	1	sp|Q5VT06|CE350_HUMAN	sp|Q5VT06|CE350_HUMAN	sp|Q5VT06|CE350_HUMAN	ISO-MSMS	2	16062020_SKO_IP_Cep78	1	exp_1	364.906	3	358.898	1073.67	NaN	NaN	NaN	-0.23381	-8.3914e-05	NaN	NaN	NaN	NaN	NaN	14.228	0.21831	14.228	14.077	14.295	0								0	0	0	0.026114	1	9859	63.216	40.163
Unmodified	_RFSPAGLHHR_			0	0	1	sp|Q5VT06|CE350_HUMAN	sp|Q5VT06|CE350_HUMAN	sp|Q5VT06|CE350_HUMAN	ISO-MSMS	0	16062020_SKO_IP_Cep78	1	exp_1	393.217	3	393.216	1176.63	NaN	NaN	NaN	0.87955	0.00034585	NaN	NaN	NaN	NaN	NaN	6.293	0.11725	6.293	6.2009	6.3181	0								0	0	0	0.021933	1	4076	68.44	46.354
Unmodified	_RLQELYRK_			0	0	2	sp|Q5VT06|CE350_HUMAN	sp|Q5VT06|CE350_HUMAN	sp|Q5VT06|CE350_HUMAN	ISO-MSMS	2	16062020_SKO_IP_Cep78	1	exp_1	378.565	3	369.221	1104.64	NaN	NaN	NaN	1.8823	0.00069497	NaN	NaN	NaN	NaN	NaN	8.7236	0.22057	8.7236	8.56	8.7805	0								0	0	0	0.016484	1	5554	103.55	60.3
Unmodified	_RLQELYRK_			0	0	2	sp|Q5VT06|CE350_HUMAN	sp|Q5VT06|CE350_HUMAN	sp|Q5VT06|CE350_HUMAN	ISO-MSMS	0	16062020_SKO_IP_Cep78	1	exp_1	369.89	3	369.221	1104.64	NaN	NaN	NaN	-0.59029	-0.00021795	NaN	NaN	NaN	NaN	NaN	8.7057	0.25413	8.7057	8.56	8.8141	0								0	0	0	0.0013201	2	5633	131.22	109.33
Unmodified	_RRLDAEEAEIR_			0	0	2	sp|Q5VT06|CE350_HUMAN	sp|Q5VT06|CE350_HUMAN	sp|Q5VT06|CE350_HUMAN	ISO-MSMS	0	16062020_SKO_IP_Cep78	1	exp_1	453.244	3	453.244	1356.71	NaN	NaN	NaN	-0.28213	-0.00012788	NaN	NaN	NaN	NaN	NaN	13.847	0.16775	13.847	13.758	13.926	0								0	0	0	4.163e-06	1	9544	150.49	106.94
Unmodified	_TLLEEPSHQHVTQETQAK_			0	0	0	sp|Q5VT06|CE350_HUMAN	sp|Q5VT06|CE350_HUMAN	sp|Q5VT06|CE350_HUMAN	ISO-MSMS	0	16062020_SKO_IP_Cep78	1	exp_1	693.019	3	692.683	2075.03	NaN	NaN	NaN	1.4127	0.00097854	NaN	NaN	NaN	NaN	NaN	16.727	0.13453	16.727	16.635	16.769	0								0	0	0	0.00022924	1	11811	74.519	55.447
Unmodified	_IVGLATK_			0	0	0	sp|Q5JTW2-5|CEP78_HUMAN;sp|Q5JTW2-2|CEP78_HUMAN	sp|Q5JTW2-5|CEP78_HUMAN	sp|Q5JTW2-5|CEP78_HUMAN	ISO-MSMS	0	16062020_SKO_IP_Cep78	1	exp_1	702.265	1	701.456	700.448	NaN	NaN	NaN	-0.39718	-0.0002786	NaN	NaN	NaN	NaN	NaN	16.253	0.75764	16.253	16.062	16.819	0								0	0	0	0.018174	1	11352	111.73	40.349
Unmodified	_ALEDEKPEPK_			0	0	1	sp|Q5JTW2-5|CEP78_HUMAN;sp|Q5JTW2-2|CEP78_HUMAN;sp|Q5JTW2|CEP78_HUMAN;sp|Q5JTW2-3|CEP78_HUMAN	sp|Q5JTW2-5|CEP78_HUMAN	sp|Q5JTW2-5|CEP78_HUMAN	ISO-MSMS	0	16062020_SKO_IP_Cep78	1	exp_1	578.296	2	578.298	1154.58	NaN	NaN	NaN	-0.073789	-4.2672e-05	NaN	NaN	NaN	NaN	NaN	8.9414	0.57374	8.9414	8.56	9.1337	0								0	0	0	0.00022776	1	5541	148.56	104.11
Unmodified	_ALEDEKPEPK_			0	0	1	sp|Q5JTW2-5|CEP78_HUMAN;sp|Q5JTW2-2|CEP78_HUMAN;sp|Q5JTW2|CEP78_HUMAN;sp|Q5JTW2-3|CEP78_HUMAN	sp|Q5JTW2-5|CEP78_HUMAN	sp|Q5JTW2-5|CEP78_HUMAN	ISO-MSMS	2	16062020_SKO_IP_Cep78	1	exp_1	586.812	2	578.298	1154.58	NaN	NaN	NaN	-0.87006	-0.00050316	NaN	NaN	NaN	NaN	NaN	8.934	0.50891	8.934	8.5924	9.1013	0								0	0	0	0.01623	2	5573	134.59	77.627
Unmodified	_EEELSRNSR_			0	0	1	sp|Q5JTW2-5|CEP78_HUMAN;sp|Q5JTW2-2|CEP78_HUMAN;sp|Q5JTW2|CEP78_HUMAN;sp|Q5JTW2-3|CEP78_HUMAN	sp|Q5JTW2-5|CEP78_HUMAN	sp|Q5JTW2-5|CEP78_HUMAN	ISO-MSMS	0	16062020_SKO_IP_Cep78	1	exp_1	560.274	2	560.273	1118.53	NaN	NaN	NaN	0.74322	0.00041641	NaN	NaN	NaN	NaN	NaN	5.874	0.067838	5.874	5.8313	5.8992	0								0	0	0	2.9283e-17	1	3743	172.25	72.329
Unmodified	_EERVIRLK_			0	0	2	sp|Q5JTW2-5|CEP78_HUMAN;sp|Q5JTW2-2|CEP78_HUMAN;sp|Q5JTW2|CEP78_HUMAN;sp|Q5JTW2-3|CEP78_HUMAN	sp|Q5JTW2-5|CEP78_HUMAN	sp|Q5JTW2-5|CEP78_HUMAN	ISO-MSMS	0	16062020_SKO_IP_Cep78	1	exp_1	521.822	2	521.822	1041.63	NaN	NaN	NaN	-0.82063	-0.00042822	NaN	NaN	NaN	NaN	NaN	11.442	0.21734	11.442	11.302	11.519	0								0	0	0	0.026292	1	7672	99.375	52.54
Unmodified	_EGVLDFNADR_			0	0	0	sp|Q5JTW2-5|CEP78_HUMAN;sp|Q5JTW2-2|CEP78_HUMAN;sp|Q5JTW2|CEP78_HUMAN;sp|Q5JTW2-3|CEP78_HUMAN	sp|Q5JTW2-5|CEP78_HUMAN	sp|Q5JTW2-5|CEP78_HUMAN	ISO-MSMS	2	16062020_SKO_IP_Cep78	1	exp_1	572.962	2	568.273	1134.53	NaN	NaN	NaN	-1.1796	-0.00067034	NaN	NaN	NaN	NaN	NaN	40.835	0.52432	40.835	40.538	41.063	0								0	0	0	3.4539e-07	2	30053	152.11	124.29
Unmodified	_ERDLTILAK_			0	0	1	sp|Q5JTW2-5|CEP78_HUMAN;sp|Q5JTW2-2|CEP78_HUMAN;sp|Q5JTW2|CEP78_HUMAN;sp|Q5JTW2-3|CEP78_HUMAN	sp|Q5JTW2-5|CEP78_HUMAN	sp|Q5JTW2-5|CEP78_HUMAN	ISO-MSMS	0	16062020_SKO_IP_Cep78	1	exp_1	529.724	2	529.814	1057.61	NaN	NaN	NaN	0.27433	0.00014534	NaN	NaN	NaN	NaN	NaN	23.138	0.36862	23.138	22.981	23.349	0								0	0	0	3.7405e-11	1	16571	167.12	92.822
Unmodified	_IVGLATK_			0	0	0	sp|Q5JTW2-5|CEP78_HUMAN;sp|Q5JTW2-2|CEP78_HUMAN	sp|Q5JTW2-5|CEP78_HUMAN	sp|Q5JTW2-5|CEP78_HUMAN	ISO-MSMS	0	16062020_SKO_IP_Cep78	1	exp_1	351.232	2	351.231	700.448	NaN	NaN	NaN	-0.50148	-0.00017614	NaN	NaN	NaN	NaN	NaN	16.235	0.92623	16.235	16.045	16.971	0								0	0	0	0.020768	1	11307	114.19	57.675
2 Oxidation (M)	_NPLIDHSM(ox)M(ox)K_	NPLIDHSM(1)M(1)K	NPLIDHSM(92.2)M(92.2)K	0	2	0	sp|Q5JTW2-5|CEP78_HUMAN;sp|Q5JTW2-2|CEP78_HUMAN;sp|Q5JTW2|CEP78_HUMAN;sp|Q5JTW2-3|CEP78_HUMAN	sp|Q5JTW2-5|CEP78_HUMAN	sp|Q5JTW2-5|CEP78_HUMAN	ISO-MSMS	0	16062020_SKO_IP_Cep78	1	exp_1	609.287	2	609.286	1216.56	NaN	NaN	NaN	0.70769	0.00043118	NaN	NaN	NaN	NaN	NaN	12.236	0.70709	12.236	11.906	12.613	-1.7764e-15								0	0	0	0.0024846	1	8114	92.201	76.66
2 Oxidation (M)	_NPLIDHSM(ox)M(ox)K_	NPLIDHSM(1)M(1)K	NPLIDHSM(60.52)M(60.52)K	0	2	0	sp|Q5JTW2-5|CEP78_HUMAN;sp|Q5JTW2-2|CEP78_HUMAN;sp|Q5JTW2|CEP78_HUMAN;sp|Q5JTW2-3|CEP78_HUMAN	sp|Q5JTW2-5|CEP78_HUMAN	sp|Q5JTW2-5|CEP78_HUMAN	ISO-MSMS	2	16062020_SKO_IP_Cep78	1	exp_1	613.294	2	609.286	1216.56	NaN	NaN	NaN	-0.2415	-0.00014714	NaN	NaN	NaN	NaN	NaN	12.223	0.69031	12.223	11.923	12.613	-1.7764e-15								0	0	0	0.015586	1	8167	60.518	40.732
Unmodified	_QESFEGFIAR_			0	0	0	sp|Q5JTW2-5|CEP78_HUMAN;sp|Q5JTW2-2|CEP78_HUMAN;sp|Q5JTW2|CEP78_HUMAN;sp|Q5JTW2-3|CEP78_HUMAN	sp|Q5JTW2-5|CEP78_HUMAN	sp|Q5JTW2-5|CEP78_HUMAN	ISO-MSMS	0	16062020_SKO_IP_Cep78	1	exp_1	592.265	2	592.291	1182.57	NaN	NaN	NaN	-0.07861	-4.656e-05	NaN	NaN	NaN	NaN	NaN	44.362	0.38358	44.362	44.172	44.556	7.1054e-15								0	0	0	3.0257e-19	3	32693	172.21	117.3
Unmodified	_QESFEGFIAR_			0	0	0	sp|Q5JTW2-5|CEP78_HUMAN;sp|Q5JTW2-2|CEP78_HUMAN;sp|Q5JTW2|CEP78_HUMAN;sp|Q5JTW2-3|CEP78_HUMAN	sp|Q5JTW2-5|CEP78_HUMAN	sp|Q5JTW2-5|CEP78_HUMAN	ISO-MSMS	2	16062020_SKO_IP_Cep78	1	exp_1	596.796	2	592.291	1182.57	NaN	NaN	NaN	0.0097625	5.7822e-06	NaN	NaN	NaN	NaN	NaN	44.327	0.34926	44.327	44.155	44.505	0								0	0	0	0.015974	1	32684	115.7	58.651
Unmodified	_RVSELEHENAQLR_			0	0	1	sp|Q5JTW2-5|CEP78_HUMAN;sp|Q5JTW2-2|CEP78_HUMAN;sp|Q5JTW2|CEP78_HUMAN;sp|Q5JTW2-3|CEP78_HUMAN	sp|Q5JTW2-5|CEP78_HUMAN	sp|Q5JTW2-5|CEP78_HUMAN	ISO-MSMS	2	16062020_SKO_IP_Cep78	1	exp_1	800.919	2	790.911	1579.81	NaN	NaN	NaN	-0.63501	-0.00050224	NaN	NaN	NaN	NaN	NaN	13.843	0.2684	13.843	13.742	14.01	0								0	0	0	1.0334e-107	1	9541	234.63	204.07
Unmodified	_TIILGSGHK_			0	0	0	sp|Q5JTW2-5|CEP78_HUMAN;sp|Q5JTW2-2|CEP78_HUMAN;sp|Q5JTW2|CEP78_HUMAN;sp|Q5JTW2-3|CEP78_HUMAN	sp|Q5JTW2-5|CEP78_HUMAN	sp|Q5JTW2-5|CEP78_HUMAN	ISO-MSMS	2	16062020_SKO_IP_Cep78	1	exp_1	467.285	2	463.277	924.539	NaN	NaN	NaN	-0.36569	-0.00016942	NaN	NaN	NaN	NaN	NaN	11.628	1.1104	11.628	11.486	12.597	0								0	0	0	0.013132	1	7774	101.54	52.183
Unmodified	_TIILGSGHK_			0	0	0	sp|Q5JTW2-5|CEP78_HUMAN;sp|Q5JTW2-2|CEP78_HUMAN;sp|Q5JTW2|CEP78_HUMAN;sp|Q5JTW2-3|CEP78_HUMAN	sp|Q5JTW2-5|CEP78_HUMAN	sp|Q5JTW2-5|CEP78_HUMAN	ISO-MSMS	0	16062020_SKO_IP_Cep78	1	exp_1	463.277	2	463.277	924.539	NaN	NaN	NaN	-0.45998	-0.0002131	NaN	NaN	NaN	NaN	NaN	11.651	1.6503	11.651	11.469	13.12	0								0	0	0	0.013132	2	7786	112.41	16.502
Unmodified	_TSIEQEALQEK_			0	0	0	sp|Q5JTW2-5|CEP78_HUMAN;sp|Q5JTW2-2|CEP78_HUMAN;sp|Q5JTW2|CEP78_HUMAN;sp|Q5JTW2-3|CEP78_HUMAN	sp|Q5JTW2-5|CEP78_HUMAN	sp|Q5JTW2-5|CEP78_HUMAN	ISO-MSMS	2	16062020_SKO_IP_Cep78	1	exp_1	642.334	2	638.325	1274.64	NaN	NaN	NaN	-1.7323	-0.0011058	NaN	NaN	NaN	NaN	NaN	25.762	0.45691	25.762	25.567	26.024	0								0	0	0	4.1284e-39	1	18532	191.4	111.18
Unmodified	_ALEDEKPEPK_			0	0	1	sp|Q5JTW2-5|CEP78_HUMAN;sp|Q5JTW2-2|CEP78_HUMAN;sp|Q5JTW2|CEP78_HUMAN;sp|Q5JTW2-3|CEP78_HUMAN	sp|Q5JTW2-5|CEP78_HUMAN	sp|Q5JTW2-5|CEP78_HUMAN	ISO-MSMS	2	16062020_SKO_IP_Cep78	1	exp_1	391.879	3	385.868	1154.58	NaN	NaN	NaN	0.38523	0.00014865	NaN	NaN	NaN	NaN	NaN	8.9287	0.49213	8.9287	8.5924	9.0845	0								0	0	0	0.0018285	3	5595	99.973	57.783
Unmodified	_ALEDEKPEPK_			0	0	1	sp|Q5JTW2-5|CEP78_HUMAN;sp|Q5JTW2-2|CEP78_HUMAN;sp|Q5JTW2|CEP78_HUMAN;sp|Q5JTW2-3|CEP78_HUMAN	sp|Q5JTW2-5|CEP78_HUMAN	sp|Q5JTW2-5|CEP78_HUMAN	ISO-MSMS	0	16062020_SKO_IP_Cep78	1	exp_1	386.219	3	385.868	1154.58	NaN	NaN	NaN	0.65054	0.00025102	NaN	NaN	NaN	NaN	NaN	8.9489	0.58936	8.9489	8.56	9.1493	0								0	0	0	0.0027686	1	5813	82.417	82.417
Unmodified	_ATIRIVGLATK_			0	0	1	sp|Q5JTW2-5|CEP78_HUMAN;sp|Q5JTW2-2|CEP78_HUMAN	sp|Q5JTW2-5|CEP78_HUMAN	sp|Q5JTW2-5|CEP78_HUMAN	ISO-MSMS	0	16062020_SKO_IP_Cep78	1	exp_1	381.581	3	381.58	1141.72	NaN	NaN	NaN	-0.0030495	-1.1636e-06	NaN	NaN	NaN	NaN	NaN	30.842	0.33941	30.842	30.657	30.996	-3.5527e-15								0	0	0	0.025981	1	22377	53.754	35.082
Unmodified	_RHRGFPLIK_			0	0	2	sp|Q5JTW2-5|CEP78_HUMAN;sp|Q5JTW2-2|CEP78_HUMAN;sp|Q5JTW2|CEP78_HUMAN;sp|Q5JTW2-3|CEP78_HUMAN	sp|Q5JTW2-5|CEP78_HUMAN	sp|Q5JTW2-5|CEP78_HUMAN	ISO-MSMS	0	16062020_SKO_IP_Cep78	1	exp_1	375.233	3	375.233	1122.68	NaN	NaN	NaN	0.078144	2.9322e-05	NaN	NaN	NaN	NaN	NaN	13.805	1.2926	13.805	13.221	14.513	1.7764e-15								0	0	0	0.025137	1	9161	83.265	83.265
Unmodified	_RRTIILGSGHK_			0	0	2	sp|Q5JTW2-5|CEP78_HUMAN;sp|Q5JTW2-2|CEP78_HUMAN;sp|Q5JTW2|CEP78_HUMAN;sp|Q5JTW2-3|CEP78_HUMAN	sp|Q5JTW2-5|CEP78_HUMAN	sp|Q5JTW2-5|CEP78_HUMAN	ISO-MSMS	0	16062020_SKO_IP_Cep78	1	exp_1	413.255	3	413.254	1236.74	NaN	NaN	NaN	0.31758	0.00013124	NaN	NaN	NaN	NaN	NaN	6.0752	0.11732	6.0752	6.0333	6.1506	0								0	0	0	0.0040259	1	3891	124.12	97.712
Unmodified	_RVSELEHENAQLR_			0	0	1	sp|Q5JTW2-5|CEP78_HUMAN;sp|Q5JTW2-2|CEP78_HUMAN;sp|Q5JTW2|CEP78_HUMAN;sp|Q5JTW2-3|CEP78_HUMAN	sp|Q5JTW2-5|CEP78_HUMAN	sp|Q5JTW2-5|CEP78_HUMAN	ISO-MSMS	0	16062020_SKO_IP_Cep78	1	exp_1	527.61	3	527.609	1579.81	NaN	NaN	NaN	-0.89425	-0.00047181	NaN	NaN	NaN	NaN	NaN	13.851	0.70542	13.851	13.556	14.262	0								0	0	0	0.0016114	1	9710	95.822	95.822
[truncated: 3 more rows]
[truncated: 22 more columns]

## Sheet: Sheet1
		Q5JTW2	sp|Q5JTW2-5|CEP78_HUMAN Isoform 4 of Centrosomal protein of 78 kDa OS=Homo sapiens GN=CEP78;sp|Q5JTW2-2|CEP78_HUMAN Isoform 2 of Centrosomal protein of 78 kDa OS=Homo sapiens GN=CEP78;sp|Q5JTW2|CEP78_HUMAN Centrosomal protein of 78 kDa OS=Homo sapiens GN=C	CEP78
[truncated: 5 more rows]
