# Supplementary material for: CEP78 functions downstream of CEP350 to control biogenesis of primary cilia by negatively regulating CP110 levels
Source: eLife. 2021 Jul 14;10:e63731. doi: 10.7554/eLife.63731 (PMC8354638; doi:10.7554/eLife.63731)
Supplement: Figure 7—figure supplement 3—source data 1. [file elife-63731-fig7-figsupp3-data1.xlsx]

## Sheet: All_genes
Gene	Average-all	Average-CEP78	Average-WT	foldChange	log2FoldChange	p-value	p-value_adjusted
ADORA1	57.7452	129.653	3.81451	0.029421	-5.08701	2.22409e-16	6.54003e-12
TNIK	258.036	560.744	31.0049	0.0552924	-4.17677	4.36293e-16	6.54003e-12
ADD2	18.4265	42.3215	0.505163	0.0119363	-6.3885	1.42514e-12	1.42419e-08
DDIT4L	172.495	359.216	32.4538	0.0903463	-3.46839	1.02513e-11	7.68333e-08
ADGRG1	41.0559	88.0125	5.83854	0.0663376	-3.91403	1.18412e-10	5.92725e-07
PDK3	48.8522	103.512	7.85712	0.0759051	-3.71966	1.18624e-10	5.92725e-07
LMO7DN	40.8339	3.14084	69.1036	22.0016	4.45954	7.05291e-10	3.02066e-06
SDC1	3178.62	6284.79	848.989	0.135086	-2.88805	1.21123e-09	4.5391e-06
DIRAS3	51.0499	111.991	5.3441	0.047719	-4.38929	2.64622e-09	8.81485e-06
PLEK2	281.805	554.186	77.5192	0.139879	-2.83774	6.64034e-09	1.99077e-05
IL13RA2	477.869	1045.14	52.4162	0.0501523	-4.31754	9.5592e-09	2.60532e-05
GPAT3	52.6395	108.982	10.3825	0.0952678	-3.39187	1.29752e-08	3.24164e-05
HLA-DPB1	193.032	378.155	54.1891	0.143299	-2.8029	1.5808e-08	3.64556e-05
PRICKLE1	228.88	41.5672	369.365	8.88596	3.15153	2.32323e-08	4.97503e-05
ISLR	8985.26	17316	2737.2	0.158074	-2.66133	2.95829e-08	5.91263e-05
RXFP1	95.9834	16.655	155.48	9.33529	3.2227	4.0805e-08	7.19608e-05
ZDHHC15	15.585	34.3485	1.51239	0.0440308	-4.50534	3.9848e-08	7.19608e-05
GBP5	64.7654	147.368	2.81362	0.0190925	-5.71085	4.73042e-08	7.87878e-05
TMTC1	3310.08	624.188	5324.5	8.53029	3.0926	9.67953e-08	0.000152733
CMTM8	52.5076	7.52319	86.246	11.464	3.51904	1.33472e-07	0.000200074
NA	39.033	6.17801	63.6742	10.3066	3.36549	1.8105e-07	0.000258471
MKX	2009.78	423.318	3199.63	7.55846	2.91809	2.13397e-07	0.000290801
COL4A5	1361.05	68.532	2330.45	34.0053	5.08769	5.10322e-07	0.000665193
GRIN2A	30.7749	68.3799	2.57111	0.0376004	-4.73311	5.5675e-07	0.000695473
NA	66.0423	125.518	21.4357	0.170778	-2.5498	1.02797e-06	0.00119871
NTRK3	20.4078	43.8886	2.79716	0.0637333	-3.97181	1.03958e-06	0.00119871
FLG-AS1	63.1774	15.1681	99.1844	6.53903	2.70908	1.39069e-06	0.00154418
HOMER2	222.279	470.112	36.4038	0.0774364	-3.69084	1.50441e-06	0.00155525
LMO7DN-IT1	14.7027	1.25915	24.7853	19.6841	4.29896	1.49383e-06	0.00155525
RAC2	447.356	851.989	143.882	0.168878	-2.56595	1.56728e-06	0.00156623
HHIP-AS1	38.5567	6.77272	62.3947	9.21265	3.20362	1.68835e-06	0.0016328
FAM46C	37.1625	74.7853	8.94546	0.119615	-3.06353	1.85238e-06	0.00173545
BTBD11	30.0025	64.5343	4.1037	0.0635895	-3.97507	1.96053e-06	0.00178111
NA	243	445.307	91.2693	0.204958	-2.2866	2.05754e-06	0.00181427
NA	23.477	46.6426	6.10272	0.13084	-2.93412	2.38626e-06	0.00198968
ANK1	149.441	39.0824	232.21	5.94154	2.57084	2.3892e-06	0.00198968
NDN	1649.51	2980.2	651.483	0.218604	-2.19361	3.05746e-06	0.00247737
ACTG2	8.04315	18.7673	0	0	#NAME?	3.25788e-06	0.00257029
CYP39A1	44.3354	9.72872	70.2904	7.22504	2.853	3.62045e-06	0.00278311
SMO	352.528	635.081	140.613	0.22141	-2.17521	4.36365e-06	0.00319079
FRMPD3	41.2978	78.3311	13.5229	0.172637	-2.53419	4.32574e-06	0.00319079
FCRLA	41.6577	79.2638	13.4532	0.169727	-2.55872	4.9005e-06	0.00341667
NA	173.38	314.612	67.4565	0.214412	-2.22155	4.85022e-06	0.00341667
MYH2	109.667	5.5652	187.743	33.7351	5.07618	5.29899e-06	0.00361054
SERPINI1	168.275	48.3868	258.192	5.336	2.41576	6.57215e-06	0.00437851
BCL11B	66.0614	149.718	3.31929	0.0221703	-5.49523	6.99369e-06	0.00451924
FAM19A5	2781.45	6143.29	260.067	0.0423336	-4.56205	7.08487e-06	0.00451924
PNLDC1	15.0606	30.4152	3.5446	0.11654	-3.1011	7.98048e-06	0.00498448
HLA-DPA1	85.6325	172.5	20.4818	0.118735	-3.07418	9.61243e-06	0.00588124
CDCP1	70.9389	153.022	9.37658	0.0612761	-4.02853	1.04398e-05	0.00613695
RPS6KA1	47.8532	88.6073	17.2877	0.195104	-2.35768	1.03787e-05	0.00613695
NA	45.3825	83.8774	16.5113	0.19685	-2.34483	1.07012e-05	0.00616968
SVEP1	9763.78	1793.03	15741.8	8.77948	3.13414	1.10401e-05	0.00624492
PCDHGC5	34.8684	65.7837	11.6818	0.177579	-2.49346	1.21969e-05	0.00677155
SOBP	57.6287	111.375	17.3188	0.155499	-2.68502	1.29857e-05	0.00683001
IGF2BP3	589.915	198.469	883.5	4.45158	2.15432	1.26771e-05	0.00683001
TNFRSF11B	15878.8	4776.81	24205.3	5.06726	2.34121	1.27588e-05	0.00683001
SST	6.32861	14.0956	0.503361	0.0357105	-4.80751	1.4987e-05	0.00774674
TSPAN13	509.117	894.066	220.405	0.24652	-2.02022	1.67857e-05	0.00852941
FABP5	236.265	419.344	98.9557	0.235977	-2.08328	1.81647e-05	0.00907628
CALB2	48.9151	94.8472	14.4661	0.15252	-2.71293	1.90466e-05	0.00936096
EPHB2	461.283	895.625	135.526	0.15132	-2.72432	1.94367e-05	0.0093986
ADCY1	41.9725	77.3077	15.4711	0.200124	-2.32104	1.99515e-05	0.0094944
GNAZ	20.5443	39.491	6.33423	0.160397	-2.64028	2.1555e-05	0.0100972
MYH1	55.1868	2.59818	94.6283	36.421	5.1867	2.2657e-05	0.0102918
MATN2	1031.61	1870.95	402.102	0.214919	-2.21814	2.23236e-05	0.0102918
ECM2	921.869	296.029	1391.25	4.69971	2.23257	2.31876e-05	0.0103756
RNF144B	525.132	165.362	794.96	4.80741	2.26526	2.40287e-05	0.0105938
ZNF492	7.56952	16.2909	1.02844	0.0631298	-3.98553	2.52621e-05	0.0109762
CNR1	140.12	0.340602	244.955	719.183	9.49022	2.57176e-05	0.0110145
IL34	131.085	6.98627	224.159	32.0857	5.00386	2.64495e-05	0.0111684
OGDHL	10.4676	22.7103	1.28556	0.0566067	-4.14288	2.74487e-05	0.0114293
CDKN3	637.688	1122	274.455	0.244613	-2.03143	2.94224e-05	0.0120833
DEPDC1B	105.211	188.327	42.8736	0.227655	-2.13508	3.06623e-05	0.0124224
FRMD5	96.6152	183.525	31.4329	0.171274	-2.54563	3.23917e-05	0.0127081
HAND2-AS1	436.594	162.232	642.365	3.95956	1.98534	3.22013e-05	0.0127081
CYBA	6269.37	11024.9	2702.68	0.245142	-2.02831	3.26393e-05	0.0127081
GAL	44.2269	102.523	0.504654	0.00492234	-7.66644	3.62738e-05	0.0139421
RTN1	1208.2	31.9163	2090.41	65.4966	6.03335	3.73696e-05	0.0141815
TRPC6	1027.78	73.0093	1743.86	23.8854	4.57806	3.85974e-05	0.0144644
COL8A1	65476.2	10724.8	106540	9.93397	3.31237	4.03107e-05	0.01492
CNIH3	555.463	959.77	252.232	0.262805	-1.92794	4.11452e-05	0.0150431
NA	652.745	238.152	963.689	4.04653	2.01669	4.23091e-05	0.0152822
KCNJ12	74.8203	143.73	23.1378	0.160981	-2.63504	4.36059e-05	0.0155632
CSMD2	643.749	1296.6	154.112	0.118859	-3.07268	4.51054e-05	0.0159089
NA	103.696	25.4682	162.367	6.37528	2.67249	4.62612e-05	0.0161269
SIPA1L2	1240.09	352.949	1905.45	5.39865	2.4326	4.73688e-05	0.0161377
CFAP46	18.7568	35.9614	5.85328	0.162766	-2.61913	4.70249e-05	0.0161377
RBPMS2	11.8776	23.6496	3.04849	0.128902	-2.95565	4.80338e-05	0.0161804
THBS1	311694	109459	463370	4.23326	2.08177	5.08304e-05	0.0169322
TGM5	5.64341	0	9.87596	Inf	Inf	5.29218e-05	0.0174351
NFASC	2615.77	4620.38	1112.32	0.240742	-2.05444	5.51045e-05	0.0179569
IGSF3	413.935	20.8768	708.729	33.9482	5.08526	5.6376e-05	0.0181737
MT2A	11045.3	19354.2	4813.57	0.248709	-2.00747	5.78557e-05	0.0184523
CD22	20.6643	38.7335	7.11245	0.183625	-2.44516	5.94953e-05	0.0187755
SEMA6B	42.5014	85.6458	10.143	0.11843	-3.07789	6.15349e-05	0.0192168
PDE5A	1182	413.474	1758.39	4.25271	2.08838	6.72062e-05	0.0205596
BUB1	720.194	1262.98	313.104	0.247908	-2.01212	6.71467e-05	0.0205596
PTK2B	1084.19	237.504	1719.21	7.23866	2.85572	7.52268e-05	0.0219229
CDIP1	1062.36	1814.19	498.495	0.274776	-1.86367	7.41172e-05	0.0219229
KCNN4	61.7571	121.102	17.2484	0.142429	-2.81168	7.50363e-05	0.0219229
CARD11	11.2967	24.3099	1.53684	0.0632187	-3.9835	7.27708e-05	0.0219229
PPP1R14C	25.67	5.98785	40.4316	6.75228	2.75537	7.53189e-05	0.0219229
BACH2	17.6729	33.7855	5.58841	0.165408	-2.5959	7.72898e-05	0.0222803
ATP1A2	13.545	0.340602	23.4483	68.8439	6.10526	7.93454e-05	0.022655
NA	22.9432	2.31624	38.4135	16.5844	4.05176	8.20391e-05	0.0232031
NA	18.8206	4.48204	29.5745	6.59844	2.72213	8.84342e-05	0.0247244
OSR2	2763	931.721	4136.46	4.43959	2.15043	8.90671e-05	0.0247244
MFSD6	447.989	163.775	661.149	4.03693	2.01326	9.05441e-05	0.0249038
PLPP4	473.454	802.873	226.389	0.281974	-1.82637	9.61849e-05	0.0262148
TMEM178A	18.4536	3.87367	29.3886	7.58675	2.92348	9.79368e-05	0.0264518
MYH3	88.6813	30.6967	132.17	4.30566	2.10623	9.89681e-05	0.0264916
MYOZ3	20.6613	38.6945	7.13639	0.184429	-2.43886	0.000102409	0.0271702
PARD3B	1765.55	565.064	2665.91	4.71789	2.23814	0.000108127	0.0284354
KRT86	46.2102	14.1464	70.2581	4.96652	2.31223	0.000110466	0.028798
CEP78	561.946	223.185	816.017	3.65624	1.87036	0.00011755	0.0298656
TM6SF2	31.2674	9.05455	47.927	5.29313	2.40412	0.000117402	0.0298656
ZNF208	13.4676	25.9716	4.0896	0.157464	-2.6669	0.000115874	0.0298656
DPYSL3	2710.37	4582.7	1306.12	0.285011	-1.81091	0.000123041	0.02999
MCHR1	16.4625	34.3236	3.06671	0.0893467	-3.48444	0.000120446	0.02999
PLAG1	389.608	149.885	569.399	3.7989	1.92558	0.000122029	0.02999
CACNA1D	13.1156	25.4985	3.82847	0.150145	-2.73557	0.000122884	0.02999
PPP4R4	28.0195	6.82435	43.9159	6.43518	2.68598	0.000120452	0.02999
NHSL2	93.4222	160.277	43.2812	0.27004	-1.88875	0.00012975	0.0310522
CCL26	26.2792	47.7588	10.1695	0.212935	-2.23151	0.000129547	0.0310522
NA	22.3034	5.45708	34.9382	6.40236	2.6786	0.000130506	0.0310522
ACKR3	1379.03	541.909	2006.87	3.70334	1.88883	0.000135725	0.0320396
SLC25A27	186.357	65.7813	276.789	4.20772	2.07304	0.000137637	0.0322371
ADAMTS1	16769	6498.41	24472	3.76584	1.91297	0.000141583	0.0329043
NA	13.0667	25.0473	4.08119	0.162939	-2.61759	0.000154005	0.0355159
CABLES1	1071.23	1792.33	530.396	0.295925	-1.7567	0.000159734	0.0365559
ECSCR	10.7472	22.3343	2.05689	0.0920955	-3.44073	0.00016222	0.0368436
CACNA1A	311.29	587.121	104.417	0.177846	-2.4913	0.000176685	0.0389486
APOBEC3B	271.381	492.927	105.221	0.213462	-2.22795	0.000176188	0.0389486
SCARA3	3714.44	6232.28	1826.06	0.292999	-1.77103	0.000176097	0.0389486
COL17A1	8.74025	17.6816	2.03424	0.115048	-3.11969	0.000174115	0.0389486
ATP2A3	185.17	340.342	68.7903	0.202121	-2.30671	0.000179685	0.0393208
KLF3-AS1	19.8235	4.70531	31.1621	6.62275	2.72743	0.000192789	0.0418827
HSPB8	897.887	1484.33	458.052	0.308591	-1.69623	0.000204991	0.0442131
WFDC21P	118.948	46.7175	173.121	3.70569	1.88974	0.000209316	0.0444038
COL9A2	321.066	110.532	478.966	4.33326	2.11545	0.000211084	0.0444038
MVK	984.025	1639.04	492.766	0.300643	-1.73388	0.000207358	0.0444038
PLCG2	34.7274	68.1193	9.68342	0.142154	-2.81447	0.000214165	0.0444038
NA	101.699	35.6072	151.267	4.24822	2.08686	0.000214762	0.0444038
ULBP1	488.766	193.277	710.382	3.67546	1.87792	0.000213437	0.0444038
SGCA	158.315	268.777	75.4693	0.280788	-1.83245	0.000217345	0.0446301
NA	120.704	42.863	179.084	4.17806	2.06283	0.000220475	0.0449649
HHIP	57.5403	7.14157	95.3393	13.3499	3.73876	0.000222551	0.0450817
SHANK2	272.764	22.1543	460.721	20.796	4.37823	0.000226157	0.0455047
HMMR	397.127	688.515	178.585	0.259377	-1.94688	0.000235625	0.046548
SLC6A17	110.418	241.797	11.8831	0.0491451	-4.34681	0.000233107	0.046548
PTENP1	6.09467	12.8496	1.02844	0.0800368	-3.64319	0.000236	0.046548
LINC00968	711.22	137.691	1141.37	8.28936	3.05126	0.000240279	0.0470821
POU2F2	162.553	273.676	79.2104	0.289431	-1.78871	0.000243316	0.0473677
CTGF	45656.9	14253.4	69209.5	4.85566	2.27967	0.000247122	0.0477983
TESMIN	17.0722	31.6721	6.12227	0.193302	-2.37107	0.000251144	0.0482648
STARD8	198.901	368.565	71.6523	0.194409	-2.36283	0.000254142	0.0485298
HHIPL2	32.3032	58.3359	12.7787	0.219054	-2.19064	0.000255766	0.0485307
CCNA2	1414.84	2353.84	710.598	0.301889	-1.72791	0.000258806	0.0487987
KIF21B	8.3079	16.6553	2.04732	0.122923	-3.02418	0.00026209	0.0491091
SCN9A	130.733	41.3723	197.754	4.77987	2.25697	0.000263903	0.0491417
GBP2	533.942	873.865	279.001	0.319272	-1.64714	0.000271344	0.0502154
NA	11.4268	0.970177	19.2693	19.8617	4.31192	0.000281669	0.0510484
NA	30.1099	8.99015	45.9498	5.11112	2.35364	0.000287888	0.0510484
MT1E	2582.53	4367.07	1244.13	0.284888	-1.81153	0.000289854	0.0510484
HMOX1	14715.3	24437	7424.06	0.303803	-1.71879	0.00028149	0.0510484
ADAMTS7	3801.59	1498.08	5529.23	3.69088	1.88396	0.000282561	0.0510484
KCND3	632.404	242.359	924.938	3.81639	1.93221	0.000286703	0.0510484
CPEB1	180.714	324.634	72.774	0.224172	-2.15732	0.00029117	0.0510484
ZBTB16	55.104	0.340602	96.1765	282.372	8.14146	0.000290414	0.0510484
ARRB1	142.38	236.83	71.5426	0.302084	-1.72698	0.000287491	0.0510484
NA	217.736	86.6778	316.029	3.64602	1.86632	0.000300074	0.0523037
SYTL3	109.895	183.375	54.7845	0.298756	-1.74296	0.000316262	0.0537929
CENPW	555.866	923.189	280.374	0.303702	-1.71927	0.000313975	0.0537929
NFIB	213.758	68.5369	322.673	4.70802	2.23512	0.000317381	0.0537929
MLXIPL	47.6398	3.64466	80.6362	22.1245	4.46757	0.000318329	0.0537929
NAALADL2	364.149	147.225	526.842	3.57847	1.83934	0.000315121	0.0537929
CEP55	1116.08	1854.26	562.453	0.30333	-1.72104	0.000319384	0.0537929
NA	4.65476	10.1822	0.509184	0.0500072	-4.32172	0.000323125	0.0541189
FGD4	798.753	105.931	1318.37	12.4456	3.63756	0.00032779	0.0545953
CA12	1463.28	2392.11	766.656	0.320493	-1.64163	0.000342598	0.0567463
MMP15	404.584	668.131	206.924	0.309705	-1.69103	0.00034518	0.0568599
IGIP	320.088	127.537	464.501	3.64208	1.86476	0.00034982	0.0573094
NA	68.8969	117.489	32.4526	0.276217	-1.85613	0.000358066	0.0583414
GRM3	5.95833	12.8743	0.771333	0.0599125	-4.061	0.000364076	0.059
FOXM1	1989.1	3518.82	841.813	0.239231	-2.06352	0.000371152	0.0596024
LAMC1	44781.2	18597.2	64419.3	3.46393	1.79241	0.000371769	0.0596024
NLGN1	334.949	139.042	481.879	3.4657	1.79315	0.000378838	0.0604126
MAP1LC3C	37.7345	12.5819	56.5989	4.49844	2.16943	0.000390909	0.0607226
NA	55.0648	105.535	17.2123	0.163097	-2.6162	0.00038688	0.0607226
PTPN22	21.8625	42.8521	6.12024	0.142822	-2.80771	0.000387138	0.0607226
BRINP1	927.487	400.765	1322.53	3.30001	1.72247	0.00038966	0.0607226
LIPG	9.98068	19.2112	3.05779	0.159167	-2.65139	0.00038413	0.0607226
SLCO2A1	111.046	230.706	21.3016	0.0923322	-3.43702	0.000410318	0.0634089
C1orf115	97.7394	25.8953	151.622	5.85521	2.54972	0.000413979	0.0636466
MYRF	26.8528	47.1453	11.6334	0.246756	-2.01884	0.000419347	0.0641429
CYP1B1	15805.7	4305.76	24430.7	5.67395	2.50435	0.000422942	0.0643645
PRSS12	2571.9	1088.92	3684.13	3.38327	1.75842	0.000429315	0.0650044
MT1L	149.65	265.904	62.4605	0.234899	-2.08989	0.000432267	0.0651224
KIF4A	495.427	863.043	219.715	0.254581	-1.9738	0.000445342	0.065855
NA	39.5676	13.4815	59.1322	4.38618	2.13296	0.000441143	0.065855
NRCAM	819.372	47.4638	1398.3	29.4604	4.8807	0.000445916	0.065855
VAV3	15.8753	29.2179	5.8684	0.20085	-2.31581	0.000442249	0.065855
BAIAP2L2	462.469	751.957	245.352	0.326285	-1.6158	0.000456008	0.0670152
CXCL14	90.3327	201.918	6.64361	0.0329025	-4.92566	0.000473082	0.0678612
KCNC4	457.881	891.445	132.708	0.148869	-2.74789	0.000471812	0.0678612
NA	3.61361	8.09498	0.252581	0.0312022	-5.00221	0.000468729	0.0678612
FAM129C	26.7839	8.6094	40.4148	4.69426	2.2309	0.000469193	0.0678612
FAM196A	48.4711	82.2423	23.1427	0.281397	-1.82932	0.000471252	0.0678612
NA	41.0661	10.0411	64.3349	6.40717	2.67969	0.0004762	0.0679832
MYO16	42.0989	9.2919	66.7041	7.17874	2.84373	0.000478813	0.0680323
RNF150	398.73	164.848	574.142	3.48285	1.80027	0.000483328	0.0683499
NA	14.1017	2.93878	22.4738	7.64734	2.93496	0.000495292	0.0691079
NA	6.48265	0.611935	10.8857	17.789	4.15291	0.000495603	0.0691079
DCHS2	72.9896	27.7677	106.906	3.85001	1.94486	0.000492989	0.0691079
MEST	675.66	178.926	1048.21	5.85834	2.55049	0.000513896	0.0709982
TNFRSF1B	420.694	727.93	190.266	0.261379	-1.93578	0.000512325	0.0709982
IL20RB	1973.97	696.227	2932.28	4.21167	2.07439	0.000521	0.0716495
NA	23.8614	0.542666	41.3504	76.1985	6.25169	0.000546071	0.0747544
CAMKK1	586.439	955.837	309.391	0.323686	-1.62733	0.000557615	0.0757334
WTAPP1	10.5966	20.6756	3.03745	0.14691	-2.76699	0.000558275	0.0757334
NMB	349.483	572.934	181.894	0.317479	-1.65527	0.000576204	0.0778135
CTLA4	7.80252	15.8422	1.77274	0.1119	-3.15972	0.000581466	0.0779585
NA	4.35551	0	7.62214	Inf	Inf	0.000582687	0.0779585
LOC102724927	118.542	48.6911	170.93	3.51051	1.81168	0.000585079	0.0779585
GNG2	747.403	1208.66	401.46	0.332153	-1.59008	0.000590059	0.0782742
PPL	1242.91	145.749	2065.77	14.1735	3.82513	0.000593433	0.078375
HIST3H2A	176.646	291.022	90.8645	0.312225	-1.67934	0.000608887	0.0800633
TTC9	56.0616	19.2209	83.6921	4.35422	2.12241	0.0006192	0.0807114
BMP6	299.074	71.9149	469.443	6.52776	2.70659	0.000618325	0.0807114
NA	337.106	144.921	481.245	3.32074	1.7315	0.000627303	0.0814136
BACE2	1200.5	1934.21	650.216	0.336166	-1.57275	0.000636665	0.0819194
BMT2	1038.8	450.244	1480.23	3.28761	1.71704	0.000635487	0.0819194
OPN3	406.171	109.728	628.504	5.72783	2.51799	0.000643468	0.082441
OLFM1	425.371	712.022	210.382	0.295471	-1.75891	0.0006523	0.0832168
P2RX6	79.1301	130.893	40.3081	0.307948	-1.69924	0.000657784	0.0835609
PRR11	685.056	1145.74	339.542	0.296351	-1.75462	0.000672835	0.0851123
PCLAF	721.466	1263.69	314.794	0.249106	-2.00517	0.000695681	0.0876324
EVI2A	72.7098	128.636	30.7655	0.239168	-2.06391	0.000700488	0.0878688
FBN1	62399.5	27572.8	88519.6	3.21039	1.68275	0.000703898	0.0879286
PPFIA4	133.075	220.576	67.4495	0.305788	-1.7094	0.000710167	0.0883436
NDRG2	16.9758	32.8458	5.0734	0.154461	-2.69468	0.00071988	0.0891818
CCNB1	2476.65	4600.72	883.59	0.192055	-2.38041	0.000735825	0.0895609
PRG4	30.8003	10.9256	45.7062	4.18339	2.06467	0.000740864	0.0895609
IQCA1	18.9369	5.35253	29.1253	5.4414	2.44398	0.000732084	0.0895609
MVD	2884.17	4656.02	1555.29	0.334039	-1.58191	0.000736834	0.0895609
GPRC5B	240.77	487.899	55.4228	0.113595	-3.13803	0.000734507	0.0895609
NEGR1	3795.6	746.182	6082.67	8.15172	3.0271	0.000738443	0.0895609
ABCG2	28.3467	50.5864	11.6669	0.230632	-2.11633	0.000745139	0.0897159
MT1F	29.3855	61.1308	5.57653	0.0912228	-3.45446	0.000750387	0.0899864
TTPA	18.2372	5.4981	27.7915	5.05474	2.33764	0.000770788	0.0920647
COL12A1	91406.6	40227.3	129791	3.22645	1.68995	0.000783399	0.0931996
CADM3	1085.25	2.36787	1897.42	801.319	9.64623	0.00079969	0.0940184
NA	147.129	61.4456	211.392	3.44032	1.78254	0.000796271	0.0940184
UGT1A10	2.68552	6.26621	0	0	#NAME?	0.000797814	0.0940184
ZMAT1	39.3768	7.10975	63.5771	8.94224	3.16064	0.000811131	0.0949911
NA	5.80802	11.8561	1.27197	0.107284	-3.2205	0.000817046	0.0951129
FCGR3A	5.17856	11.0549	0.771333	0.0697732	-3.84118	0.000818516	0.0951129
YJEFN3	62.7292	25.758	90.4577	3.51183	1.81222	0.000822042	0.0951538
SMOC1	109.432	4.68767	187.99	40.1031	5.32564	0.000840324	0.0968959
FGF10	50.2637	13.0508	78.1734	5.98992	2.58254	0.000851223	0.097578
NA	75.0029	13.5102	121.122	8.96528	3.16435	0.00085275	0.097578
MIR155HG	52.0318	86.3405	26.3003	0.304611	-1.71496	0.000864769	0.0985771
PTTG1	1143.68	2101.09	425.63	0.202576	-2.30346	0.000879765	0.0997857
NA	263.51	111.567	377.468	3.38333	1.75844	0.000882028	0.0997857
TMEM266	66.0329	23.1457	98.1982	4.24261	2.08495	0.000889034	0.1002
NA	20.6039	38.8988	6.88275	0.17694	-2.49867	0.000904887	0.101226
RASSF9	43.7529	14.6961	65.5455	4.46007	2.15707	0.000904656	0.101226
RPS6KA2	11771.6	5438.46	16521.5	3.0379	1.60307	0.000914722	0.101568
NA	10.1259	1.08533	16.9063	15.5771	3.96135	0.000914094	0.101568
SEMA3C	7869.98	3587.8	11081.6	3.08869	1.627	0.000930923	0.102986
RHBDL3	12.4321	24.6325	3.2819	0.133235	-2.90796	0.000949047	0.104605
SCD	4152.85	7027.24	1997.06	0.284188	-1.81508	0.000960955	0.104917
DGKG	11.4858	22.3684	3.32382	0.148594	-2.75055	0.000962384	0.104917
NA	9.14776	20.6719	0.504654	0.0244126	-5.35623	0.000960169	0.104917
FOXP2	174.976	51.7707	267.381	5.16471	2.36869	0.000978567	0.106295
IL1RN	12.3377	28.1145	0.505163	0.0179681	-5.79842	0.00101061	0.108986
NRIP3	276.767	445.336	150.339	0.337586	-1.56667	0.00100757	0.108986
MPIG6B	3.75586	0	6.57276	Inf	Inf	0.00102133	0.109355
NA	15.573	29.5129	5.11805	0.173417	-2.52768	0.00102087	0.109355
NEDD9	1073.36	438.49	1549.52	3.53375	1.8212	0.00103279	0.109798
NA	12.8173	2.95642	20.213	6.837	2.77336	0.00103187	0.109798
RNF144A-AS1	8.15769	17.6754	1.01939	0.0576724	-4.11598	0.00104259	0.110059
RNF175	9.31091	1.85344	14.904	8.04125	3.00742	0.0010411	0.110059
NEK2	365.196	621.522	172.952	0.278271	-1.84544	0.00106716	0.112257
GTSE1	1127.9	2094.06	403.283	0.192585	-2.37644	0.00107819	0.113021
STMN1	4759.15	7920.76	2387.94	0.301478	-1.72988	0.00108343	0.113175
GPR1	1281.62	606.227	1788.17	2.94967	1.56055	0.00109514	0.113415
CKS2	1279.18	2161.21	617.656	0.285792	-1.80696	0.00109653	0.113415
SKA3	354.748	609.182	163.923	0.269086	-1.89386	0.00109707	0.113415
KLF15	175.387	77.7445	248.62	3.19791	1.67713	0.00112019	0.115406
EFR3B	29.4283	50.0102	13.9919	0.27978	-1.83763	0.00114615	0.117677
KNDC1	54.4046	105.671	15.955	0.150988	-2.72749	0.00121006	0.123669
EPHB6	762.525	77.6342	1276.19	16.4386	4.03901	0.00121482	0.123669
DGKB	12.0994	22.1672	4.54856	0.205193	-2.28495	0.00121689	0.123669
TRPV6	6.2086	0.698844	10.3409	14.7972	3.88725	0.00122357	0.123855
CACNA1S	3.99416	8.63408	0.514222	0.0595573	-4.06958	0.00122699	0.123855
SLC38A1	5615.39	2682.36	7815.16	2.91355	1.54278	0.00124271	0.125022
GREB1L	465.376	102.84	737.278	7.16915	2.8418	0.00124886	0.12522
CARMIL2	214.197	458.916	30.6576	0.0668045	-3.90391	0.00126754	0.125415
TMEM130	453.155	48.7335	756.472	15.5226	3.9563	0.0012609	0.125415
NA	27.2737	10.1103	40.1461	3.9708	1.98943	0.00126541	0.125415
DERL3	22.4218	40.1579	9.11979	0.227098	-2.13861	0.0012568	0.125415
DBP	324.335	520.33	177.339	0.340821	-1.55292	0.00127783	0.125659
DLGAP5	842.36	1437.51	395.997	0.275474	-1.86001	0.00127838	0.125659
NA	3.62936	0	6.35137	Inf	Inf	0.00129174	0.126399
DLL3	14.7545	26.6483	5.83411	0.21893	-2.19146	0.00129435	0.126399
PLXNB1	1775.47	838.984	2477.83	2.95337	1.56236	0.00130036	0.126574
NA	3.60678	0	6.31186	Inf	Inf	0.00130723	0.126831
NA	10.6341	2.48302	16.7475	6.7448	2.75378	0.00132809	0.128046
FDFT1	5563.08	8759.28	3165.93	0.361437	-1.46818	0.0013283	0.128046
LGR5	2316.04	139.702	3948.3	28.2623	4.8208	0.00134891	0.12882
RPP25	711.204	1132.6	395.16	0.348898	-1.51912	0.00134922	0.12882
RET	15.5218	29.4097	5.10589	0.173613	-2.52605	0.00134347	0.12882
THEM5	13.4771	1.51284	22.4504	14.8398	3.8914	0.00136091	0.129214
NA	19.1016	5.79065	29.0849	5.02273	2.32847	0.00136627	0.129214
CYP2B6	4.87015	11.0209	0.257111	0.0233295	-5.4217	0.00136356	0.129214
LOC654841	23.5498	8.35571	34.9453	4.18221	2.06426	0.00139225	0.131256
IL4I1	21.3402	38.9109	8.1622	0.209767	-2.25314	0.00140486	0.132031
NUSAP1	1073.71	1856.21	486.841	0.262276	-1.93084	0.00141866	0.132911
PCDHGA10	376.731	170.49	531.412	3.11697	1.64015	0.00144433	0.133868
SEMA4B	381.248	605.277	213.226	0.352277	-1.50522	0.00144674	0.133868
LINC01111	62.3694	10.0812	101.586	10.0767	3.33295	0.00144235	0.133868
POM121L9P	63.5493	9.36029	104.191	11.1312	3.47653	0.00144104	0.133868
PODXL	8294.57	14919.3	3326	0.222933	-2.16532	0.00147084	0.135679
ESM1	44.8065	80.9219	17.72	0.218976	-2.19115	0.00149118	0.137134
LOC400743	74.8148	20.2299	115.753	5.72191	2.5165	0.00155464	0.140295
FNBP1L	1013.98	479.828	1414.59	2.94812	1.55979	0.00155116	0.140295
SPAG5	198.065	347.085	86.3008	0.248645	-2.00784	0.00154267	0.140295
PLGLA	34.0677	13.0434	49.8359	3.82078	1.93387	0.00154429	0.140295
MT1X	16.9328	30.019	7.11813	0.237121	-2.0763	0.00153598	0.140295
RPH3AL	173.853	296.451	81.9055	0.276287	-1.85576	0.00155045	0.140295
ASXL3	6.70396	13.2489	1.79525	0.135502	-2.88362	0.00155832	0.140295
IFI27	198.439	405.556	43.1023	0.10628	-3.23406	0.00156471	0.140449
ADCY8	7.72198	17.3458	0.504145	0.0290645	-5.1046	0.00157502	0.140652
RGS14	246.654	388.601	140.193	0.360763	-1.47088	0.00158574	0.140652
NA	12.7137	3.69628	19.4767	5.26926	2.3976	0.00158356	0.140652
CHEK2P2	2.43082	5.67192	0	0	#NAME?	0.00158039	0.140652
TNNC2	16.1209	4.93076	24.5134	4.97153	2.31369	0.00161704	0.141885
RPL22L1	1954.15	3083.93	1106.81	0.358895	-1.47837	0.00163277	0.141885
NA	14.7012	4.33647	22.4748	5.18274	2.37371	0.00162554	0.141885
SPHK1	5256.73	8750.04	2636.74	0.30134	-1.73053	0.00162341	0.141885
PPP2R2B	39.2834	77.5398	10.5911	0.136589	-2.87208	0.0016051	0.141885
LRP8	292.489	462.332	165.107	0.357117	-1.48553	0.0016129	0.141885
ZFHX2-AS1	13.202	3.4638	20.5057	5.91999	2.5656	0.00162887	0.141885
SORT1	2746.96	1264.27	3858.97	3.05233	1.60991	0.00164717	0.142373
NA	42.7579	70.6655	21.8273	0.308882	-1.69487	0.00165263	0.142373
KIF20A	1489.49	2638.75	627.544	0.237819	-2.07207	0.00165141	0.142373
NA	15.616	27.6547	6.58699	0.238187	-2.06983	0.00166114	0.142697
LPAR3	3.78972	8.17258	0.502576	0.0614954	-4.02338	0.00168401	0.144247
CCPG1	1497.3	628.585	2148.84	3.41854	1.77338	0.00170768	0.14491
GRPR	11.2361	21.8247	3.2946	0.150957	-2.72779	0.00171108	0.14491
NA	228.648	108.51	318.751	2.93752	1.5546	0.00170058	0.14491
IQCH-AS1	79.6109	34.9255	113.125	3.23903	1.69556	0.00170415	0.14491
COL22A1	10.4161	22.5902	1.28556	0.0569077	-4.13523	0.00173251	0.146311
CGNL1	87.3933	145.777	43.6055	0.299125	-1.74118	0.0017479	0.147175
CDC25C	153.798	282.444	57.3135	0.20292	-2.30102	0.00175353	0.147175
GLIPR1L2	20.8159	7.10717	31.0974	4.3755	2.12945	0.00175746	0.147175
NA	6.30881	12.3269	1.79525	0.145637	-2.77955	0.00178721	0.148013
SLC22A16	3.16163	7.03433	0.257111	0.0365509	-4.77395	0.00178096	0.148013
NA	6446.02	1057.15	10487.7	9.92069	3.31044	0.00177948	0.148013
RTN4RL2	19.5331	37.1257	6.33867	0.170735	-2.55017	0.00178514	0.148013
KCCAT198	52.438	96.3172	19.5287	0.202754	-2.3022	0.00185237	0.152987
NA	12.4149	25.2334	2.80104	0.111006	-3.1713	0.0018738	0.153488
PSMB9	563.651	885.345	322.381	0.36413	-1.45747	0.00187024	0.153488
GEM	469.101	735.785	269.087	0.365715	-1.45121	0.00187088	0.153488
NA	109.093	49.0719	154.109	3.14047	1.65098	0.00188376	0.153839
ACAT2	812.24	1262.91	474.239	0.375513	-1.41306	0.00188836	0.153839
SLC9A7P1	67.9311	28.6055	97.4252	3.40582	1.768	0.00189672	0.154102
CCNB2	842.73	1484.87	361.128	0.243205	-2.03975	0.00191094	0.154838
RAMP2	12.034	25.0398	2.27975	0.0910451	-3.45728	0.00191638	0.15486
GDA	13.9526	0	24.4171	Inf	Inf	0.00192719	0.155315
NPR3	857.52	366.332	1225.91	3.34645	1.74263	0.00194039	0.155791
SLITRK1	157.707	3.1232	273.644	87.6166	6.45313	0.00194869	0.155791
CD274	46.2474	90.6466	12.9481	0.142841	-2.80751	0.00194846	0.155791
RACGAP1	1825.36	3010.59	936.443	0.31105	-1.68478	0.00200333	0.158824
PKD2	5076.19	2394.38	7087.54	2.96007	1.56563	0.00199991	0.158824
EFNB3	241.978	459.214	79.0505	0.172143	-2.53832	0.00200781	0.158824
TMEM51	50.864	81.7889	27.6703	0.338314	-1.56356	0.00200003	0.158824
LMCD1	7893.69	3774.56	10983	2.90975	1.5409	0.00204152	0.161065
CIART	161.2	254.656	91.1082	0.35777	-1.48289	0.00205878	0.161577
RCAN2	2163.9	1046.39	3002.04	2.86896	1.52053	0.00205603	0.161577
PGBD5	12.9472	26.1591	3.03838	0.11615	-3.10594	0.00207319	0.16186
NA	26.4722	9.77461	38.9955	3.98946	1.9962	0.00206786	0.16186
AMT	145.353	58.5305	210.47	3.59591	1.84636	0.00211071	0.164119
STC2	50354.6	24216.7	69958	2.88883	1.53049	0.0021134	0.164119
ZSWIM5	14.4205	4.61483	21.7747	4.71843	2.23831	0.00211855	0.164119
NA	3.33005	0	5.82758	Inf	Inf	0.00213427	0.164487
TM4SF20	174.506	3.42982	302.813	88.2884	6.46415	0.00212925	0.164487
NA	37.884	12.6745	56.7911	4.48073	2.16373	0.00215185	0.164862
SPP1	53.7368	115.855	7.14813	0.0616989	-4.01861	0.00215563	0.164862
SLC46A3	359.993	139.817	525.126	3.75582	1.90913	0.00215005	0.164862
TGFB1	12736.2	22082.9	5726.12	0.259301	-1.9473	0.00218159	0.166
NA	7.9265	0.340602	13.6159	39.9761	5.32107	0.00217906	0.166
SGMS2	1533.59	644.967	2200.06	3.41112	1.77025	0.00219719	0.166764
NIPAL4	6.09201	12.5218	1.26966	0.101395	-3.30194	0.00220982	0.167299
DNMT3B	223.482	350.848	127.957	0.364708	-1.45519	0.00221843	0.167527
PID1	1543.38	761.453	2129.83	2.79706	1.48391	0.00225142	0.169592
LAPTM4B	1801.88	2807.95	1047.32	0.372985	-1.42281	0.00227805	0.171168
ANLN	2656.03	4145.9	1538.63	0.371121	-1.43004	0.00230148	0.172496
ACP5	148.632	290.363	42.3337	0.145796	-2.77798	0.00234455	0.172909
TRIML2	5.58767	12.7018	0.252072	0.0198454	-5.65505	0.00231965	0.172909
LOC101929479	74.9422	120.767	40.5735	0.335965	-1.57362	0.00235411	0.172909
MRAP2	25.749	43.0672	12.7603	0.296289	-1.75492	0.0023341	0.172909
EMILIN2	4478.73	6955.59	2621.08	0.376831	-1.40801	0.00232886	0.172909
CCR1	10.5546	24.6274	0	0	#NAME?	0.00234074	0.172909
TGFBI	157772	258808	81994.3	0.316815	-1.65829	0.00232626	0.172909
PLA2G16	384.116	170.663	544.205	3.18877	1.673	0.00234874	0.172909
ITGA6	743.921	1387.33	261.362	0.188392	-2.40819	0.0023589	0.172909
MALAT1	6892.25	3184.4	9673.14	3.03767	1.60296	0.00239097	0.173984
MT1G	5.5643	10.9658	1.51318	0.137991	-2.85736	0.0023894	0.173984
MALL	606.384	1237.43	133.1	0.107562	-3.21676	0.00238535	0.173984
SPTA1	16.7889	35.4186	2.81658	0.0795225	-3.65249	0.00241017	0.174754
CHI3L1	70.924	141.62	17.9018	0.126407	-2.98385	0.00241905	0.174754
MAD2L1	724.376	1216.48	355.301	0.292074	-1.7756	0.00241562	0.174754
UGCG	3663.12	1801.61	5059.26	2.80818	1.48964	0.00243295	0.175336
PRELP	1086.86	495.464	1530.41	3.08885	1.62707	0.00245917	0.175538
OSBPL10	681.857	193.043	1048.47	5.43125	2.44128	0.00245775	0.175538
NA	9.79733	0	17.1453	Inf	Inf	0.00244915	0.175538
LOC728975	49.4705	80.4246	26.255	0.326455	-1.61505	0.00244893	0.175538
PYCARD	278.395	435.101	160.866	0.369721	-1.43549	0.00247244	0.176066
CD163L1	206.158	80.6453	300.293	3.72363	1.89671	0.00250139	0.177165
CLEC2B	1158.63	1780.8	692.002	0.38859	-1.36368	0.00249635	0.177165
BTK	2.18823	5.10587	0	0	#NAME?	0.00250561	0.177165
POLE2	120.73	198.234	62.6017	0.315798	-1.66293	0.00251727	0.177412
NA	9.97671	1.41533	16.3977	11.5858	3.53429	0.00252094	0.177412
NA	2.95629	6.55519	0.257111	0.0392225	-4.67217	0.00255235	0.177702
NES	924.779	1973.07	138.563	0.0702271	-3.83183	0.00253735	0.177702
SYT14	107.44	210.813	29.9103	0.141881	-2.81725	0.0025547	0.177702
NDNF	242.885	436.677	97.5408	0.22337	-2.16249	0.00253367	0.177702
2009-03-01	140.739	221.398	80.2443	0.362443	-1.46417	0.00254725	0.177702
NA	190.963	87.6193	268.471	3.06407	1.61545	0.0025808	0.179103
HORMAD1	11.7078	27.3182	0	0	#NAME?	0.00258848	0.179221
FRY	384.992	145.349	564.724	3.88529	1.95802	0.00260586	0.180008
DPEP1	22.1304	2.71333	36.6931	13.5233	3.75737	0.00263332	0.181487
ENHO	5.65415	11.1806	1.5093	0.134992	-2.88905	0.00269138	0.185063
SSX2IP	728.925	1175.25	394.179	0.335399	-1.57605	0.00272748	0.185955
SLC45A3	88.9838	146.7	45.6968	0.311499	-1.6827	0.00273228	0.185955
H2AFZ	4296.78	6701.73	2493.08	0.372005	-1.42661	0.00271875	0.185955
ZC3H12D	24.5508	40.754	12.3984	0.304226	-1.71678	0.00273537	0.185955
SHANK3	510.834	795.236	297.534	0.374145	-1.41833	0.002727	0.185955
CD320	2070.24	3610.76	914.844	0.253366	-1.9807	0.00283268	0.19127
WNT5A	6939.49	1611.42	10935.6	6.7863	2.76263	0.00282869	0.19127
CHML	659.903	318.326	916.085	2.87782	1.52498	0.00282005	0.19127
PAK5	6.82395	14.2085	1.28556	0.090478	-3.46629	0.00284599	0.191737
SHCBP1	996.99	1634.35	518.969	0.317538	-1.655	0.00287798	0.193292
POLQ	218.599	341.421	126.482	0.370459	-1.43261	0.00288733	0.193292
LOC105376382	17.8425	33.8286	5.85287	0.173015	-2.53103	0.00288842	0.193292
APLN	59.7892	102.757	27.5635	0.26824	-1.8984	0.00290892	0.194231
INSIG1	5874.14	9227.59	3359.04	0.364021	-1.45791	0.00292396	0.194713
CCNJL	15.2438	34.2192	1.01227	0.0295819	-5.07914	0.00292913	0.194713
NA	4.09627	8.52953	0.771333	0.0904309	-3.46704	0.00297802	0.197525
NA	41.2474	10.0111	64.6747	6.46031	2.6916	0.00299235	0.198037
NLRP10	102.885	18.369	166.273	9.05184	3.17821	0.00300274	0.198287
TYMS	1027.07	1626.96	577.145	0.354737	-1.49518	0.00302194	0.199116
NDFIP2	2544.65	1268.74	3501.58	2.7599	1.46462	0.00304446	0.20016
SCRG1	105.836	23.0593	167.918	7.28202	2.86434	0.00310337	0.203429
MFSD2B	20.4126	5.50871	31.5905	5.73465	2.51971	0.00313219	0.203429
LDB2	450.847	884.301	125.756	0.142209	-2.81391	0.00310961	0.203429
EPB41L5	576.017	287.368	792.503	2.75779	1.46351	0.0031349	0.203429
PARPBP	185.374	290.349	106.643	0.367293	-1.445	0.00311688	0.203429
PRPS1	5643.03	8582.12	3438.71	0.400683	-1.31947	0.00313176	0.203429
COL16A1	26648.1	10905.9	38454.7	3.52606	1.81806	0.00319468	0.206433
RSPO1	219.926	9.12869	378.024	41.4106	5.37193	0.00319496	0.206433
CAPG	9221.94	14223.4	5470.82	0.384634	-1.37844	0.00320378	0.206558
TENM2	2937.4	4493.99	1769.96	0.393851	-1.34428	0.00322365	0.207393
KIAA0895	36.2539	15.3407	51.9388	3.38569	1.75945	0.0032313	0.207439
SMPD3	45.1778	20.011	64.0529	3.20088	1.67847	0.00324966	0.208172
AR	476.582	231.875	660.112	2.84684	1.50936	0.00327311	0.208905
ARHGDIG	11.6921	21.8371	4.08327	0.186988	-2.41898	0.00327502	0.208905
SGO1	57.6473	92.2286	31.7113	0.343834	-1.54022	0.00328225	0.208921
ARHGEF28	711.367	338.595	990.945	2.92664	1.54924	0.00329107	0.209039
NA	25.9782	10.4289	37.6402	3.60923	1.85169	0.00331235	0.209945
TRABD2A	66.1206	103.961	37.7401	0.363021	-1.46187	0.00332545	0.210331
KIF26A	8.70312	17.9503	1.7677	0.0984773	-3.34406	0.00333563	0.210531
ADTRP	62.5189	98.2768	35.7006	0.363266	-1.4609	0.0033457	0.210723
ZWINT	1033.27	1712.29	523.996	0.30602	-1.7083	0.00335365	0.210781
NA	15.6112	5.27266	23.3651	4.43137	2.14775	0.0033807	0.211153
PLXNC1	922.061	1700.55	338.193	0.198873	-2.33008	0.00337208	0.211153
MAP2	265.185	89.5649	396.899	4.43141	2.14777	0.00337748	0.211153
ADAM23	241.305	381.367	136.258	0.357289	-1.48484	0.00340096	0.211537
PLEKHA1	1460.08	735.102	2003.8	2.72588	1.44672	0.00339436	0.211537
BDKRB1	66.664	125.41	22.6044	0.180244	-2.47197	0.00342215	0.211538
LINC00933	61.2701	28.1753	86.0913	3.05556	1.61144	0.00341226	0.211538
ITGA11	37869.5	19346.3	51761.9	2.67555	1.41983	0.00341618	0.211538
PTPRG-AS1	16.2144	28.0257	7.35587	0.262469	-1.92978	0.00348758	0.214022
SLC23A3	50.8939	22.6172	72.1015	3.1879	1.67261	0.00347758	0.214022
ITGA2	475.657	731.003	284.148	0.388709	-1.36324	0.00348462	0.214022
NA	27.0313	10.7284	39.2584	3.65928	1.87156	0.00349089	0.214022
LDLRAD2	25.8319	10.3067	37.4758	3.63608	1.86238	0.00349955	0.214098
NA	31.6183	13.4263	45.2623	3.37116	1.75325	0.0035064	0.214098
SERPINA3	27.036	3.25113	44.8746	13.8028	3.78688	0.00351968	0.214472
STOX2	6.17371	12.0322	1.77986	0.147925	-2.75707	0.00353696	0.215088
NA	6.44451	0.883268	10.6154	12.0184	3.58717	0.00355128	0.215521
NRK	14.2304	1.07473	24.0971	22.4216	4.48682	0.0035704	0.216244
NA	11.5293	2.56993	18.2488	7.10088	2.828	0.00359107	0.217057
COL15A1	2894.54	237.649	4887.2	20.5648	4.3621	0.00360847	0.21767
CFH	1035.44	372.591	1532.58	4.11331	2.0403	0.0036182	0.217818
NA	4.5342	9.22837	1.01356	0.109831	-3.18664	0.00365523	0.218831
EFEMP1	16244.5	6661.56	23431.6	3.51744	1.81453	0.00364567	0.218831
NA	13.8629	1.42593	23.1906	16.2634	4.02356	0.00365691	0.218831
ASIC1	157.817	244.961	92.4596	0.377446	-1.40566	0.00366564	0.218849
NSG1	11.1	19.4649	4.82641	0.247954	-2.01185	0.0036749	0.218849
CENPA	293.727	528.726	117.477	0.222189	-2.17014	0.00368641	0.218849
APOD	1009.63	186.815	1626.74	8.70778	3.1223	0.00368166	0.218849
NA	23.2179	9.35987	33.6114	3.59101	1.84439	0.00372786	0.219046
DMRT2	7.89604	16.3981	1.51951	0.0926638	-3.43185	0.00373655	0.219046
TSGA10IP	5.32972	11.0725	1.02262	0.0923568	-3.43664	0.00374098	0.219046
CAPN5	2319.39	3548.64	1397.46	0.393801	-1.34446	0.00372828	0.219046
SNAI1	632.543	962.021	385.434	0.40065	-1.31959	0.00374073	0.219046
NCAPH	401.951	715.376	166.883	0.23328	-2.09987	0.0037142	0.219046
FAM196B	298.008	458.132	177.914	0.388347	-1.36458	0.00371784	0.219046
NA	2.01202	4.69471	0	0	#NAME?	0.00374819	0.219046
MAOA	745.219	240.195	1123.99	4.67948	2.22635	0.00377165	0.219136
AURKA	1074.34	1865.44	481.01	0.257852	-1.95538	0.00376576	0.219136
CYP2U1	1057.87	528.511	1454.9	2.75282	1.46091	0.00376851	0.219136
SLC8A1	1198.38	590.352	1654.4	2.8024	1.48666	0.00385134	0.222902
CACNG7	14.5214	31.8547	1.52145	0.0477623	-4.38799	0.0038452	0.222902
ZBTB20	37.7082	59.885	21.0755	0.351933	-1.50663	0.00387993	0.224124
NA	88.6403	41.8381	123.742	2.95764	1.56445	0.00391525	0.224865
MFAP5	17647.5	6557.79	25964.8	3.95938	1.98528	0.00391223	0.224865
CCDC34	472.673	728.312	280.943	0.385746	-1.37428	0.00391292	0.224865
TTK	344.545	565.99	178.462	0.315308	-1.66516	0.00392692	0.225103
LMO7	23773.9	11791.4	32760.8	2.77836	1.47423	0.00394791	0.225875
SLC22A3	7.20072	13.4206	2.53584	0.188952	-2.40391	0.00396968	0.226687
KIF2C	782.34	1424.17	300.969	0.21133	-2.24243	0.00400482	0.227395
LUM	16613.8	7508.2	23443	3.12231	1.64262	0.00399792	0.227395
CSF1R	33.3675	53.4934	18.2731	0.341595	-1.54964	0.00400281	0.227395
NEAT1	18275.1	9196.84	25083.8	2.72744	1.44755	0.00402447	0.227403
LY6G5B	31.2225	13.4779	44.5309	3.30399	1.72421	0.00402772	0.227403
TRIP13	844.657	1424.41	409.84	0.287725	-1.79724	0.00402586	0.227403
NA	9.11314	17.2178	3.03463	0.176249	-2.50431	0.00410308	0.230883
FGF14	2432.62	665.175	3758.2	5.64993	2.49823	0.00410476	0.230883
NA	47.433	20.8556	67.3661	3.23013	1.69159	0.00412473	0.231572
PCSK5	204.624	100.06	283.048	2.82879	1.50018	0.00413284	0.231593
SLC9A3R1	1778.89	2709.96	1080.59	0.39875	-1.32645	0.00414392	0.231781
PDGFRB	24339.8	12498.5	33220.8	2.65799	1.41034	0.00416778	0.231787
NA	5.75594	0.611935	9.61395	15.7107	3.97368	0.00416134	0.231787
CUBN	141.443	217.361	84.505	0.388778	-1.36298	0.0041653	0.231787
NA	19.6397	7.36215	28.8479	3.91841	1.97027	0.00417495	0.231787
IL3RA	34.1745	15.0273	48.5348	3.22977	1.69143	0.00418558	0.231947
MIR3936HG	14.4308	4.72295	21.7117	4.59705	2.20071	0.00419802	0.232208
NA	13.5581	26.4934	3.85667	0.145571	-2.78021	0.00421749	0.232855
NA	64.5289	29.8232	90.5581	3.0365	1.60241	0.00433702	0.239014
2003-09-01	10.0043	19.9472	2.54717	0.127696	-2.96922	0.00436145	0.23992
PAX7	7.99189	17.2765	1.02844	0.0595286	-4.07027	0.00440257	0.241738
ASPHD1	261.988	401.096	157.658	0.393067	-1.34715	0.00443641	0.243151
SIM1	364.022	189.113	495.204	2.61855	1.38877	0.00445647	0.243805
MMP3	14721.3	32701.2	1236.43	0.0378099	-4.72509	0.00452626	0.247172
ELFN2	55.5622	118.834	8.10807	0.06823	-3.87345	0.00457728	0.249503
MAFB	1824.41	3165.07	818.912	0.258734	-1.95046	0.00459651	0.250097
NA	3.88596	0.271333	6.59693	24.313	4.60366	0.00461685	0.250748
NA	7.74832	1.90507	12.1308	6.36761	2.67075	0.00464671	0.251914
NA	45.7638	20.7285	64.5402	3.1136	1.63858	0.00474491	0.256608
ZNF876P	14.3908	24.8002	6.58376	0.265471	-1.91337	0.00475042	0.256608
RELT	185.75	285.023	111.296	0.390481	-1.35668	0.00480071	0.258858
LURAP1L	1568.45	828.353	2123.53	2.56356	1.35815	0.00482852	0.25989
RPA3	574.238	878.145	346.309	0.394364	-1.3424	0.00490418	0.26349
NR0B1	21.8861	39.8968	8.37818	0.209996	-2.25156	0.00492434	0.2641
RASGRF1	6.74765	12.6652	2.30947	0.182347	-2.45524	0.00499474	0.267052
DACT3	1828.99	2774.2	1120.08	0.403749	-1.30847	0.00499721	0.267052
NA	175.568	306.02	77.7294	0.254001	-1.97709	0.00502529	0.267599
MACROD1	1001.47	1607.86	546.67	0.339998	-1.5564	0.00501849	0.267599
NA	64.4068	100.928	37.0157	0.366752	-1.44712	0.00505222	0.268439
RHBDF2	312.497	476.769	189.293	0.397032	-1.33267	0.00505972	0.268439
ADGRG2	17.3432	6.40962	25.5434	3.98517	1.99464	0.00506792	0.268439
NUDT1	1047.63	1601.48	632.236	0.394783	-1.34087	0.0051009	0.268761
ABCC8	3.25674	6.91343	0.514222	0.0743802	-3.74894	0.00509424	0.268761
FANCD2	239.582	368.236	143.092	0.388587	-1.36369	0.00508379	0.268761
TUFT1	576.817	294.302	788.702	2.6799	1.42218	0.00512284	0.269444
ROBO2	887.589	116.043	1466.25	12.6354	3.6594	0.0051541	0.27014
NR1D1	570.766	873.897	343.417	0.392972	-1.3475	0.00514756	0.27014
CFAP70	39.1701	16.3285	56.3013	3.44804	1.78578	0.00518607	0.271341
ABCA10	49.087	20.4563	70.56	3.44931	1.78631	0.00520045	0.271619
NA	19.8764	7.89292	28.864	3.65694	1.87064	0.00524159	0.273292
GRIA4	6.53941	13.2017	1.54267	0.116853	-3.09723	0.00526344	0.273955
PLAC9	3584.29	1921.15	4831.65	2.51497	1.33054	0.00528293	0.274493
VANGL2	3.59215	8.38168	0	0	#NAME?	0.00530097	0.274953
SEC31B	111.678	55.0456	154.152	2.80045	1.48566	0.00531983	0.275455
HOTAIRM1	186.61	96.2469	254.382	2.64301	1.40218	0.00537826	0.275517
ESYT3	51.2696	80.7815	29.1356	0.360672	-1.47124	0.00538777	0.275517
ABCA5	567.148	284.919	778.82	2.73348	1.45074	0.00533483	0.275517
NA	6.14416	1.1546	9.88632	8.56255	3.09804	0.0053854	0.275517
NA	3.4705	0	6.07337	Inf	Inf	0.00536023	0.275517
CNTFR	2.52992	5.56033	0.257111	0.0462402	-4.43471	0.00537183	0.275517
PLCE1	406.292	214.486	550.146	2.56496	1.35893	0.00539455	0.275517
NA	222.823	74.3979	334.143	4.49129	2.16713	0.00538069	0.275517
LOC107984360	37.3052	59.9831	20.2968	0.338375	-1.56331	0.00540789	0.275607
LZTS1	233.268	493.804	37.8663	0.0766828	-3.70495	0.00541468	0.275607
SOX2	2.03924	4.75824	0	0	#NAME?	0.00543834	0.275874
GMNC	21.6173	2.02726	36.3098	17.9108	4.16275	0.00543648	0.275874
HIC1	2766.12	4432.3	1516.49	0.342147	-1.54731	0.00548973	0.277012
KSR2	3.79474	8.51763	0.252581	0.029654	-5.07563	0.00547154	0.277012
RAD51AP1	304.676	487.054	167.893	0.344711	-1.53654	0.00548374	0.277012
NA	1063.96	1697.9	588.498	0.346603	-1.52864	0.00550535	0.277012
MELK	953.91	1452.55	579.927	0.399246	-1.32465	0.00550698	0.277012
UBE2T	470.563	784.53	235.087	0.299654	-1.73863	0.00552307	0.277356
SPOCD1	2567.69	4887.27	828.001	0.16942	-2.56133	0.00554087	0.277785
NA	9.54202	1.08533	15.8845	14.6356	3.87141	0.00555519	0.278038
LOC101928516	16.5689	0.681203	28.4847	41.8153	5.38596	0.00558998	0.279313
ABCC3	2640.39	1383.41	3583.12	2.59005	1.37298	0.00562234	0.279996
PTCHD4	68.8537	18.3737	106.714	5.80795	2.53803	0.00562234	0.279996
RAB3IL1	2930.88	4398.36	1830.26	0.416124	-1.26492	0.00565386	0.280666
NA	10.9104	3.46954	16.491	4.75308	2.24886	0.00565452	0.280666
LINC01133	1567.59	758.989	2174.04	2.86438	1.51822	0.00569022	0.280954
ERICH5	14.6891	25.1341	6.85533	0.27275	-1.87435	0.0056978	0.280954
TROAP	363.184	680.836	124.945	0.183517	-2.44601	0.00567356	0.280954
NA	52.02	24.0172	73.0221	3.04041	1.60427	0.00568353	0.280954
PRC1	1791.72	2891.15	967.143	0.334518	-1.57984	0.00570964	0.281076
ST8SIA2	121.116	252.797	22.3551	0.0884308	-3.49931	0.00576479	0.283325
FSIP1	73.5444	24.6763	110.195	4.46564	2.15887	0.00577523	0.283374
E2F7	331.399	504.745	201.39	0.398993	-1.32556	0.00581907	0.285058
LOC101927630	7.88582	1.24151	12.869	10.3656	3.37374	0.00590341	0.285723
FERMT1	30.328	54.9064	11.8943	0.216628	-2.20671	0.00584609	0.285723
FAM189A1	6.05603	11.4356	2.02134	0.176759	-2.50015	0.00591679	0.285723
DHRS2	4.24923	8.56481	1.01254	0.118221	-3.08044	0.00591841	0.285723
NA	35.7294	1.53048	61.3787	40.1041	5.32568	0.00590271	0.285723
NA	18.9345	7.39614	27.5883	3.73009	1.89921	0.0058825	0.285723
CENPM	626.374	1242.52	164.263	0.132201	-2.9192	0.00589355	0.285723
TMPRSS2	6.33328	13.4064	1.02844	0.076713	-3.70438	0.00585896	0.285723
NA	59.3507	28.9787	82.1297	2.83414	1.50291	0.00590072	0.285723
OR7E47P	4.91374	0.340602	8.34359	24.4966	4.61451	0.00594484	0.286078
KCNT2	55.4264	8.27941	90.7866	10.9653	3.45488	0.005944	0.286078
PRKCB	15.987	33.1893	3.08533	0.0929618	-3.42722	0.00595717	0.286212
MERTK	10.6934	1.75593	17.3964	9.90725	3.30848	0.00598012	0.286854
SORCS2	513.84	826.658	279.226	0.337777	-1.56586	0.0060265	0.287574
CLEC2A	59.484	114.647	18.1117	0.157978	-2.66221	0.00608146	0.287574
ABLIM1	250.056	132.044	338.565	2.56404	1.35842	0.006054	0.287574
PDE7B	186.984	285.491	113.104	0.396174	-1.33579	0.0060624	0.287574
WDR64	5.36211	1.07473	8.57765	7.98124	2.99661	0.00604497	0.287574
NOXA1	37.0275	16.8901	52.1305	3.08645	1.62595	0.00603415	0.287574
SPC24	473.624	846.247	194.158	0.229434	-2.12385	0.00604523	0.287574
CRISPLD2	2545.58	4200.98	1304.03	0.310412	-1.68774	0.00603768	0.287574
PNP	376.027	594.008	212.541	0.357809	-1.48274	0.00607369	0.287574
TUBA4A	390.313	623.226	215.629	0.345988	-1.5312	0.00609487	0.287755
PIANP	20.451	39.9391	5.83503	0.146098	-2.77499	0.00611195	0.288107
LSR	150.854	231.368	90.4689	0.391017	-1.3547	0.00614351	0.288776
FAT3	81.8397	140.034	38.1937	0.272745	-1.87437	0.0061454	0.288776
ATP6V1G2	28.7035	48.6772	13.7232	0.281922	-1.82663	0.00615513	0.28878
LIMS2	2515.44	1328.64	3405.55	2.56319	1.35794	0.00618981	0.289954
OXT	7.16185	14.025	2.01446	0.143633	-2.79954	0.00625093	0.290177
LOC101927815	4.63023	10.8039	0	0	#NAME?	0.00622951	0.290177
PLSCR4	1822.17	956.42	2471.49	2.5841	1.36966	0.00624165	0.290177
ARSI	541.771	935.695	246.328	0.263257	-1.92546	0.00625079	0.290177
SH2D5	641.448	992.867	377.883	0.380597	-1.39366	0.0062124	0.290177
JPT1	3457.13	5262.06	2103.43	0.399736	-1.32288	0.00625265	0.290177
G6PC2	2.59987	5.72355	0.257111	0.0449216	-4.47645	0.0062813	0.291056
KIF15	225.119	359.11	124.625	0.347038	-1.52684	0.00630584	0.291742
CERS4	31.8826	69.0095	4.03737	0.0585046	-4.09531	0.00633125	0.291776
NA	5.05868	9.78294	1.51549	0.154911	-2.69049	0.00632133	0.291776
IL32	119.863	61.0709	163.957	2.6847	1.42476	0.00633576	0.291776
HSD3B2	3.71073	7.62992	0.771333	0.101093	-3.30624	0.00635692	0.292301
NA	10.4416	18.2583	4.5791	0.250796	-1.99541	0.00638711	0.29324
NA	114.995	55.4474	159.655	2.8794	1.52577	0.00641022	0.293851
LINC00595	665.502	1063.37	367.102	0.345225	-1.53439	0.00646808	0.29605
STAT1	25090.3	12855	34266.8	2.66565	1.41448	0.00648294	0.296278
TNFRSF13C	4.74696	9.3682	1.28103	0.136742	-2.87047	0.006502	0.296697
FOXQ1	542.763	1053.56	159.662	0.151545	-2.72218	0.00654696	0.298295
CYBRD1	23393.6	12204.1	31785.7	2.6045	1.38101	0.00658232	0.29945
GSTO1	4861.18	7293.06	3037.28	0.416461	-1.26375	0.00660334	0.299952
TPX2	2643.48	4311.65	1392.36	0.322929	-1.63071	0.00661596	0.30007
LINC00511	93.0959	162.005	41.4138	0.255632	-1.96786	0.0067026	0.303541
KIR3DL1	5.80025	12.5055	0.771333	0.0616796	-4.01906	0.00672402	0.303762
TMEM106C	2220.06	3333.19	1385.21	0.41558	-1.2668	0.00672776	0.303762
SAMD12	121.746	34.3785	187.271	5.44734	2.44555	0.00674392	0.304034
RHEBL1	37.1556	59.299	20.5481	0.346517	-1.529	0.00675618	0.30413
CENPI	231.453	350.457	142.201	0.405758	-1.30131	0.00679406	0.305008
BBOX1-AS1	13.2186	27.7951	2.28631	0.082256	-3.60374	0.00679605	0.305008
CYP3A4	6.08424	13.5109	0.514222	0.0380597	-4.71559	0.00682368	0.305791
NA	3.57113	7.31627	0.762274	0.104189	-3.26273	0.00684089	0.306104
MCTP2	85.3811	42.9538	117.202	2.72855	1.44813	0.00685448	0.306175
LOC100505622	6.04527	11.4061	2.02467	0.177508	-2.49404	0.0068629	0.306175
FAM83D	665.72	1199.24	265.582	0.221459	-2.17489	0.00690726	0.307696
GPR3	42.4712	67.3237	23.8317	0.353987	-1.49823	0.00692803	0.308164
ITGBL1	19182.6	8357.61	27301.4	3.26666	1.70781	0.00695866	0.309068
GABARAPL1	5389.75	2906.02	7252.54	2.4957	1.31944	0.00698651	0.309845
SLC38A4	719.78	255.544	1067.96	4.17915	2.06321	0.00700078	0.31002
ADAM33	5044.63	2756.52	6760.71	2.45263	1.29433	0.00706037	0.312198
LAMB2	27994.3	14841	37859.3	2.55099	1.35106	0.00708324	0.312747
KEL	5.1728	10.0318	1.52857	0.152373	-2.71432	0.00712541	0.313115
TTC6	5.1405	11.3156	0.509184	0.0449984	-4.47398	0.00714378	0.313115
BDKRB2	162.685	275.197	78.3019	0.284531	-1.81334	0.00713355	0.313115
NA	73.8365	116.953	41.499	0.354834	-1.49478	0.00713159	0.313115
IL23R	1.83181	4.27423	0	0	#NAME?	0.00711129	0.313115
ZNF536	250.566	374.811	157.383	0.4199	-1.25188	0.00718164	0.314315
SAA1	107.68	2.98466	186.201	62.3859	5.96315	0.0072078	0.314541
EFHC2	6.32079	12.3609	1.79072	0.14487	-2.78717	0.00720223	0.314541
KLF4	2130.1	1186.13	2838.08	2.39272	1.25865	0.00724441	0.315679
ORC1	108.052	176.78	56.5059	0.31964	-1.64548	0.00729542	0.317441
MAF	370.858	707.313	118.517	0.167559	-2.57726	0.00732515	0.317812
HAUS7	218.661	117.093	294.837	2.51799	1.33227	0.00732452	0.317812
NA	6.55278	1.44357	10.3847	7.19373	2.84674	0.0073536	0.318585
NA	99.3377	50.9788	135.607	2.66007	1.41146	0.00740971	0.320553
CCDC134	96.672	147.475	58.57	0.397153	-1.33223	0.00744718	0.321247
RBM47	48.112	79.6099	24.4886	0.307607	-1.70084	0.00743761	0.321247
MSLN	10.5015	0.629575	17.9054	28.4404	4.82987	0.00745855	0.321275
UBE2Q2L	7.4023	13.5706	2.77608	0.204566	-2.28936	0.00747284	0.321428
NA	543.747	825.464	332.46	0.402755	-1.31203	0.00754019	0.321557
KIF18A	210.402	316.607	130.749	0.412969	-1.2759	0.0075382	0.321557
BLVRB	2857.94	4387.13	1711.05	0.390017	-1.35839	0.00750686	0.321557
NA	24.318	9.29061	35.5885	3.83059	1.93757	0.00752302	0.321557
PECR	205.216	306.718	129.089	0.420871	-1.24855	0.00753771	0.321557
ARNTL2	459.803	686.858	289.511	0.4215	-1.2464	0.00751736	0.321557
HAUS8	317.667	485.821	191.552	0.394285	-1.34269	0.00758251	0.322405
NA	23.9227	10.619	33.9004	3.19242	1.67465	0.00760307	0.322405
B3GALT2	538.745	270.171	740.175	2.73965	1.45399	0.00760004	0.322405
KIFC1	1189.06	2187.1	440.534	0.201423	-2.3117	0.00758662	0.322405
NA	27.2497	11.9523	38.7227	3.23977	1.69589	0.00761699	0.322539
PLEKHH2	301.24	141.807	420.814	2.96751	1.56925	0.00765124	0.323265
NA	50.5246	78.6638	29.4202	0.373999	-1.41889	0.00765571	0.323265
TNXB	6915.02	1984.68	10612.8	5.34734	2.41882	0.00775719	0.326575
TP53I11	4470.15	2111.29	6239.29	2.9552	1.56326	0.00775513	0.326575
PARD6G	125.942	239.398	40.8498	0.170635	-2.55101	0.00776677	0.326575
RASEF	46.4057	71.1388	27.8558	0.39157	-1.35266	0.00789925	0.330292
MESP2	31.4213	49.2267	18.0671	0.367019	-1.44607	0.00788929	0.330292
SRL	4.00997	7.99876	1.01837	0.127316	-2.97352	0.00787762	0.330292
MLPH	645.756	1079.06	320.779	0.297276	-1.75013	0.0078741	0.330292
LOC103611081	119.039	62.2777	161.61	2.59498	1.37572	0.00792644	0.330967
DLX1	143.283	299.398	26.1968	0.0874985	-3.5146	0.00799195	0.332932
SEMA3D	1170.22	638.691	1568.87	2.45638	1.29653	0.0079957	0.332932
STMN3	558.948	1180.74	92.6033	0.0784281	-3.67249	0.00803984	0.334221
LIN28B	3.61657	7.41021	0.771333	0.104091	-3.26409	0.00806102	0.334221
EDN1	714.487	371.083	972.04	2.61947	1.38927	0.00806296	0.334221
WWC1	208.816	366.38	90.6426	0.2474	-2.01508	0.00807124	0.334221
NSDHL	1373.26	2044.1	870.136	0.425681	-1.23215	0.00809548	0.334762
SCN2A	81.4767	130.741	44.5284	0.340585	-1.55391	0.00812293	0.335035
LRRK2	337.976	183.782	453.622	2.46827	1.3035	0.00812444	0.335035
PIK3CG	6.83	13.8798	1.54267	0.111145	-3.16949	0.00822445	0.338694
TNF	14.2121	29.0478	3.08533	0.106216	-3.23493	0.00825201	0.339363
TRIM6	85.176	129.047	52.2728	0.405069	-1.30376	0.00828841	0.33939
CENPF	1453.97	2244.73	860.905	0.383523	-1.38261	0.00828694	0.33939
GLYCTK	140.674	213.256	86.2368	0.404381	-1.30621	0.0082978	0.33939
HJURP	692.378	1176.15	329.546	0.280189	-1.83553	0.00829795	0.33939
TDO2	23.1685	47.5994	4.84527	0.101793	-3.29629	0.00833955	0.340626
ADM2	2074.56	1184.87	2741.83	2.31404	1.21041	0.00836079	0.341029
LOC100507053	196.104	104.193	265.037	2.54371	1.34694	0.00841998	0.342977
AGTR2	2.48358	5.45221	0.257111	0.0471572	-4.40638	0.00850564	0.344636
NR2F1-AS1	526.991	277.896	713.811	2.56862	1.36099	0.00851433	0.344636
ALPK2	4709.79	2562.86	6319.98	2.46598	1.30216	0.00852969	0.344636
CKAP2L	430.237	685.96	238.444	0.347607	-1.52447	0.00850077	0.344636
NA	27.7519	45.4191	14.5015	0.319282	-1.6471	0.00851207	0.344636
PLGLB1	23.5402	10.3772	33.4125	3.21978	1.68696	0.00852053	0.344636
NA	52.6013	25.2758	73.0954	2.89192	1.53203	0.00855691	0.345271
MYLK4	36.7312	17.2753	51.3232	2.9709	1.5709	0.00862316	0.346709
NA	45.2926	21.7622	62.9404	2.89219	1.53216	0.0086224	0.346709
COLQ	29.7771	13.5508	41.9469	3.09554	1.63019	0.00862726	0.346709
CLCA2	19.7013	31.7221	10.6857	0.336855	-1.5698	0.00871183	0.348706
ABCC6P1	2.45131	5.38295	0.252581	0.0469225	-4.41358	0.00870881	0.348706
KIAA1522	957.969	1446.28	591.735	0.409143	-1.28932	0.00870861	0.348706
RIMS4	26.6923	7.43716	41.1337	5.53083	2.4675	0.00875077	0.349797
TRPM6	7.81425	15.8612	1.77907	0.112165	-3.1563	0.00877162	0.350164
PHLDA1	1621.41	2410.47	1029.61	0.42714	-1.22722	0.00880704	0.350975
OLFML2A	412.452	110.487	638.925	5.78283	2.53178	0.00882019	0.350975
RAET1E-AS1	161.307	243.324	99.7942	0.41013	-1.28585	0.00882705	0.350975
MATK	4.72021	9.32459	1.26693	0.135869	-2.87971	0.0088639	0.351973
TRAF1	170.918	92.9484	229.395	2.46799	1.30334	0.00892435	0.352562
CDKN2C	1934.65	2873.48	1230.52	0.428234	-1.22353	0.00893399	0.352562
SAV1	1994.92	1096.59	2668.66	2.43359	1.28308	0.00889448	0.352562
CTTNBP2	5.72092	11.9853	1.02262	0.0853229	-3.55092	0.00893752	0.352562
AARD	89.5651	1.51284	155.604	102.855	6.68447	0.00892685	0.352562
CPXM2	1698.1	3118.1	633.103	0.203042	-2.30015	0.00896585	0.353214
PTPRO	37.9694	2.17066	64.8185	29.8611	4.9002	0.00900625	0.354341
MMP10	10.9945	21.5715	3.06167	0.141931	-2.81674	0.00902165	0.354481
FMNL3	1208.91	1792.72	771.054	0.430103	-1.21725	0.00911929	0.357381
KNSTRN	770.963	1149.44	487.104	0.423774	-1.23863	0.00911666	0.357381
ANKFN1	31.0118	13.6557	44.0288	3.2242	1.68894	0.00913779	0.357523
BRSK1	155.309	282.364	60.0173	0.212553	-2.23411	0.00914678	0.357523
NME1	657.016	982.774	412.698	0.419932	-1.25177	0.00918698	0.358514
LAMC3	12.1295	20.5732	5.79666	0.281758	-1.82747	0.00919605	0.358514
TLX2	44.7769	95.3356	6.85779	0.0719331	-3.7972	0.00923203	0.358983
SALL2	40.1989	62.5422	23.4415	0.37481	-1.41577	0.00922019	0.358983
ZNF732	5.05765	9.78035	1.51563	0.154967	-2.68997	0.00926489	0.359795
TMEM71	19.5254	31.7609	10.3487	0.325833	-1.6178	0.00927845	0.359855
LOC81691	156.549	238.829	94.8388	0.397098	-1.33243	0.00933502	0.361581
TMC7	39.0495	61.3805	22.3012	0.363328	-1.46066	0.00936794	0.362388
NFKBIZ	575.113	316.974	768.717	2.42517	1.27809	0.00944148	0.364762
RGL3	66.5593	17.1703	103.601	6.03374	2.59305	0.00949346	0.366298
MKI67	1984.09	3074.47	1166.29	0.379348	-1.39841	0.0095207	0.366877
WT1	5.04771	10.7495	0.771333	0.071755	-3.80078	0.0095577	0.366888
NA	77.2566	159.717	15.4113	0.096491	-3.37346	0.00954207	0.366888
NCOA3	2207.1	1200.85	2961.79	2.46642	1.30242	0.00955661	0.366888
HPDL	35.8017	55.8127	20.7935	0.37256	-1.42446	0.00961316	0.368545
GPM6B	460.974	15.3468	795.194	51.8148	5.69529	0.00966055	0.36862
C3orf52	54.9382	84.4807	32.7812	0.388032	-1.36575	0.00966429	0.36862
INHBA-AS1	18.4318	7.65113	26.5174	3.46581	1.79319	0.00966137	0.36862
CCR7	68.8816	24.8126	101.933	4.10813	2.03848	0.00965925	0.36862
NA	14.8452	5.65785	21.7357	3.84169	1.94174	0.00976138	0.371378
NA	5.5981	0.629575	9.32449	14.8108	3.88857	0.00975463	0.371378
KIR2DL4	5.57563	11.6386	1.02844	0.0883653	-3.50038	0.00980686	0.372636
LTB4R	118.57	53.1247	167.654	3.15586	1.65803	0.0098737	0.372906
OIP5	95.2731	160.772	46.1488	0.287045	-1.80065	0.00991349	0.372906
CHST15	160.98	75.5718	225.036	2.97778	1.57424	0.00986034	0.372906
GRIA1	111.394	18.8305	180.817	9.60236	3.26339	0.00990048	0.372906
THEMIS2	90.1573	136.045	55.7413	0.409726	-1.28727	0.0098557	0.372906
TUBA1B	5886.65	10653.6	2311.41	0.21696	-2.2045	0.00986438	0.372906
CHCHD10	1189.48	1750.2	768.936	0.439341	-1.18659	0.00991084	0.372906
TCAF1	3638.75	1985.26	4878.87	2.45755	1.29722	0.00989099	0.372906
RAB37	17.8166	31.4211	7.61322	0.242296	-2.04515	0.0100252	0.374758
OTOF	2.27234	4.96604	0.252072	0.0507592	-4.30019	0.00999414	0.374758
MEG9	123.729	66.4962	166.654	2.50621	1.32551	0.00998937	0.374758
NA	16.2362	2.56993	26.4859	10.3061	3.36542	0.010005	0.374758
NR2F1	1385.12	448.758	2087.39	4.65148	2.21769	0.01002	0.374758
RGS7	115.327	23.2967	184.349	7.91312	2.98425	0.0100436	0.374978
NA	121.635	66.4722	163.008	2.45227	1.29412	0.010067	0.375383
NUDT10	11.8129	20.1284	5.57625	0.277035	-1.85186	0.010099	0.376111
IGF2	6028.56	173.562	10419.8	60.0352	5.90774	0.0101776	0.37763
MT1A	22.6926	39.7895	9.86987	0.248052	-2.01128	0.010165	0.37763
LAMA2	5106.84	2245.17	7253.1	3.23053	1.69177	0.0101635	0.37763
ERF	4204.81	6465.95	2508.95	0.388026	-1.36578	0.0101981	0.377922
LOC284023	115.194	59.4147	157.029	2.64294	1.40214	0.0102228	0.37837
DDX39A	3421.01	5437.86	1908.38	0.350943	-1.51069	0.0102358	0.378383
BORCS6	822.178	1213.07	529.008	0.43609	-1.1973	0.0102677	0.37863
ARFGEF3	66.5002	33.7799	91.0405	2.69511	1.43034	0.0102602	0.37863
UBE2C	1321.67	2527.17	417.542	0.165221	-2.59753	0.0103652	0.381755
NA	14.579	3.41218	22.9541	6.72711	2.74999	0.0104394	0.382394
KIF14	336.76	534.032	188.806	0.353549	-1.50002	0.0104177	0.382394
MPP7	37.4707	18.6001	51.6236	2.77544	1.47272	0.0104257	0.382394
LINC00106	65.9968	25.4717	96.3906	3.78422	1.92	0.0104591	0.382394
RGS19	747.376	1109.69	475.643	0.428628	-1.2222	0.0104577	0.382394
SORD	455.388	670.531	294.03	0.438503	-1.18934	0.0104459	0.382394
HNMT	884.428	401.081	1246.94	3.10894	1.63642	0.0104847	0.382863
LINC01589	14.7018	2.33258	23.9787	10.2799	3.36175	0.0105135	0.382984
BUB1B	536.894	892.754	269.999	0.302434	-1.72531	0.0105112	0.382984
NA	14.1919	23.6306	7.11282	0.301	-1.73216	0.010599	0.384114
ADAMTSL4	2882.17	1582.16	3857.18	2.43792	1.28565	0.0105957	0.384114
MAB21L2	3.23123	7.53954	0	0	#NAME?	0.0105807	0.384114
CDC25B	3791.59	5617.8	2421.93	0.431118	-1.21384	0.010577	0.384114
DNPH1	2193.79	3248.6	1402.68	0.431778	-1.21164	0.0106086	0.384114
SNRPA	1517.43	2438.81	826.392	0.338851	-1.56128	0.0106255	0.384259
NA	21.346	1.42593	36.2861	25.4473	4.66944	0.0106569	0.384933
LMNB1	1191.8	1943.27	628.194	0.323266	-1.62921	0.0107103	0.386394
COX8A	1232.79	1915.4	720.835	0.376337	-1.4099	0.0107381	0.386934
SDF2L1	1306.9	2081.28	726.117	0.348881	-1.51919	0.0107849	0.388152
NBR2	95.7528	39.4028	138.015	3.50268	1.80846	0.0108005	0.388249
PTPRN	122.447	262.786	17.1924	0.0654238	-3.93404	0.0108319	0.38891
ADCYAP1R1	1.64048	3.82779	0	0	#NAME?	0.0109432	0.390213
PGM5	8.32277	17.7404	1.25958	0.0710007	-3.81602	0.0109831	0.390213
AMDHD2	544.618	797.926	354.636	0.444447	-1.16992	0.0109776	0.390213
SEMA6A	119.376	22.54	192.004	8.51833	3.09057	0.0109867	0.390213
C17orf53	118.132	182.095	70.1603	0.385296	-1.37596	0.0109468	0.390213
NA	4.86544	9.31528	1.52806	0.164038	-2.6079	0.0110002	0.390213
EBF3	199.866	80.5773	289.332	3.59074	1.84428	0.0110113	0.390213
ZNF90	25.7294	40.7708	14.4483	0.354379	-1.49664	0.0109466	0.390213
SLC25A10	105.368	173.972	53.9146	0.309904	-1.69011	0.0109262	0.390213
BLM	87.7281	132.798	53.9255	0.406071	-1.3002	0.0109296	0.390213
DHFR	1670.32	2466.73	1073.02	0.434995	-1.20093	0.0109683	0.390213
GSTM3	1148.84	585.775	1571.13	2.68214	1.42338	0.0110681	0.39176
NA	45.1643	23.1595	61.668	2.66275	1.41292	0.0110858	0.391925
NUF2	396.39	656.956	200.965	0.305903	-1.70885	0.0111881	0.394991
TPTEP1	306.788	624.766	68.3035	0.109326	-3.19329	0.0112027	0.394991
TRPC4	330.433	537.212	175.349	0.326405	-1.61526	0.0112121	0.394991
VGF	55.2411	120.138	6.56874	0.0546768	-4.19293	0.011238	0.395442
NCS1	4408.47	6466.77	2864.75	0.442996	-1.17463	0.0112874	0.396087
NA	3.28867	0.271333	5.55167	20.4607	4.35478	0.0113224	0.396087
COL4A6	37.1138	3.65526	62.2078	17.0187	4.08905	0.0113207	0.396087
NA	30.9087	15.0424	42.8085	2.84585	1.50886	0.0113195	0.396087
LOC283299	4.15281	0.271333	7.06393	26.0341	4.70233	0.0112793	0.396087
NA	17.0874	3.86793	27.0019	6.98097	2.80343	0.0114091	0.398652
PIM3	1170.19	1729.71	750.543	0.433912	-1.20453	0.0114244	0.398723
SNCA	22.76	7.30566	34.3507	4.70194	2.23326	0.0114916	0.398951
PLPP2	89.0965	184.352	17.6552	0.0957692	-3.38429	0.0114825	0.398951
NEIL3	148.549	243.408	77.4052	0.318006	-1.65287	0.0114967	0.398951
METTL27	187.05	336.054	75.2972	0.224063	-2.15802	0.0114975	0.398951
NA	4231.17	7237.1	1976.73	0.273138	-1.8723	0.0114874	0.398951
CD177	14.7906	24.374	7.60297	0.311929	-1.68071	0.0115225	0.399357
NA	160.557	88.3731	214.695	2.42942	1.28061	0.0115884	0.401179
ROR1	1491.82	741.638	2054.46	2.77017	1.46997	0.0116266	0.401911
NA	16.4472	7.01095	23.5244	3.35538	1.74648	0.0116364	0.401911
B4GALNT4	80.6069	171.875	12.1555	0.0707229	-3.82168	0.0116516	0.401975
PPP1R13L	1604.6	911.347	2124.55	2.33122	1.22108	0.0117097	0.403514
ALK	15.3256	29.2901	4.85225	0.165662	-2.59368	0.0117728	0.404958
CYFIP2	154.626	253.074	80.7901	0.319235	-1.64731	0.0117786	0.404958
GPR21	4582.36	2552.69	6104.61	2.39144	1.25788	0.0118606	0.40731
MYH6	5.17934	9.68542	1.79978	0.185823	-2.428	0.0119031	0.408299
NA	11.5672	19.2182	5.82897	0.303304	-1.72116	0.011959	0.40975
NA	22.1362	7.26593	33.2889	4.58151	2.19582	0.0120202	0.410908
ASS1	6426.72	3683.45	8484.18	2.30333	1.20372	0.0120072	0.410908
NA	87.626	131.174	54.9649	0.419023	-1.2549	0.0120346	0.41093
GSC	48.885	87.8241	19.6806	0.224091	-2.15784	0.0121172	0.413281
PCSK1N	66.6792	101.497	40.5655	0.39967	-1.32312	0.01215	0.41393
LINC01016	10.5823	4.05453	15.4782	3.81751	1.93263	0.0122413	0.416565
LCAT	334.168	190.234	442.119	2.32408	1.21666	0.0122661	0.416624
INMT	652.724	54.4942	1101.4	20.2112	4.33709	0.0122708	0.416624
NA	48.6589	24.4649	66.8044	2.73062	1.44923	0.012338	0.41843
C3	843.515	208.766	1319.58	6.32084	2.66012	0.0124512	0.418841
CDCA2	365.275	594.757	193.165	0.324779	-1.62247	0.0124602	0.418841
LINC02268	4.02486	0.629575	6.57133	10.4377	3.38373	0.0123699	0.418841
TRIM73	10.169	3.19951	15.3962	4.81204	2.26665	0.0124758	0.418841
NA	4.75186	0.970177	7.58813	7.82138	2.96742	0.0124233	0.418841
NA	6.47288	0	11.3275	Inf	Inf	0.0123958	0.418841
COL13A1	967.336	1414.98	631.605	0.446372	-1.16368	0.0124627	0.418841
NA	6.75318	1.92271	10.376	5.39656	2.43204	0.012428	0.418841
NA	109.588	58.6996	147.754	2.51711	1.33177	0.0124016	0.418841
KIF11	890.453	1345.17	549.417	0.408438	-1.29181	0.0125001	0.418878
IDH2	3286.26	4820.68	2135.44	0.442976	-1.1747	0.0125049	0.418878
MND1	76.7264	125.062	40.4751	0.323641	-1.62753	0.012596	0.421458
OAS3	484.137	716.623	309.772	0.432267	-1.21001	0.0126563	0.423007
TSHR	11.4938	22.7111	3.0808	0.135652	-2.88202	0.0126906	0.423259
GACAT2	36.9193	56.944	21.9008	0.384602	-1.37856	0.0126921	0.423259
MMAB	863.101	1260.75	564.865	0.448039	-1.1583	0.012775	0.425077
NMNAT2	397.461	94.6611	624.561	6.59786	2.722	0.0127689	0.425077
TLR4	1048.17	578.166	1400.67	2.4226	1.27656	0.0128073	0.425269
KIR3DL2	4.3262	8.38039	1.28556	0.1534	-2.70462	0.0128091	0.425269
CHD7	53.9316	81.6466	33.1454	0.405962	-1.30058	0.0129149	0.427864
GINS4	248.592	402.316	133.298	0.331327	-1.59367	0.0129158	0.427864
GLI1	59.6507	111.073	21.0842	0.189823	-2.39727	0.0129786	0.429468
ETFB	373.405	551.003	240.207	0.435946	-1.19778	0.0130017	0.429758
CENPH	293.308	473.867	157.889	0.333193	-1.58557	0.0130222	0.429961
CEP72	68.9073	104.408	42.2819	0.404969	-1.30412	0.0130933	0.43136
IL17B	8.36303	16.1528	2.52068	0.156052	-2.6799	0.0130823	0.43136
CPNE2	1374.92	2173.85	775.724	0.356844	-1.48663	0.0131997	0.431689
RBM38	351.627	569.83	187.975	0.32988	-1.59999	0.0131364	0.431689
SELL	3.67594	7.54875	0.771333	0.10218	-3.29081	0.0132041	0.431689
CNGB3	4.39642	8.89481	1.02262	0.114968	-3.12069	0.0131534	0.431689
NA	77.7108	118.572	47.0651	0.396933	-1.33303	0.0131667	0.431689
LINC02154	2.68623	5.59432	0.505163	0.0902992	-3.46914	0.0131862	0.431689
HIST4H4	22.8062	10.0953	32.3393	3.20341	1.67961	0.0131418	0.431689
MYL3	41.926	16.0453	61.3366	3.82272	1.9346	0.0132341	0.432197
CCND2	499.775	47.2594	839.162	17.7565	4.15027	0.0132974	0.433166
NA	13.1246	4.69471	19.447	4.14233	2.05044	0.0133071	0.433166
IRF6	23.7851	42.6052	9.67006	0.226969	-2.13943	0.0133052	0.433166
NAV3	1553.83	850.064	2081.65	2.44881	1.29208	0.0135412	0.437318
NCOA7	940.517	530.97	1247.68	2.34981	1.23254	0.013551	0.437318
CLEC12A	23.2942	52.9819	1.02844	0.0194113	-5.68696	0.0134813	0.437318
MYB	9.03399	15.664	4.06151	0.25929	-1.94736	0.0135803	0.437318
CES4A	103.728	55.6394	139.795	2.51252	1.32913	0.0134666	0.437318
NA	5.94916	1.42593	9.34159	6.55121	2.71176	0.0135534	0.437318
SLITRK5	46.6378	6.66817	76.615	11.4897	3.52226	0.0135306	0.437318
NA	36.2946	18.2009	49.865	2.7397	1.45402	0.0135381	0.437318
TMEM151A	16.868	7.68025	23.7587	3.09349	1.62923	0.0134497	0.437318
SHMT1	460.776	693.9	285.933	0.412067	-1.27905	0.0135877	0.437318
CDC20	2437.63	4844.92	632.157	0.130478	-2.93812	0.0135951	0.437318
PABPC1L	421.84	244.332	554.97	2.27138	1.18357	0.0136123	0.437404
FANCA	370.807	642.926	166.718	0.259312	-1.94724	0.013659	0.438434
NA	289.127	159.24	386.543	2.42743	1.27943	0.0136889	0.438923
CEACAM19	212.139	109.947	288.784	2.62656	1.39318	0.0137535	0.440144
DCPS	503.405	739.917	326.021	0.440618	-1.1824	0.0137563	0.440144
NA	46.2022	6.12551	76.2598	12.4495	3.63802	0.0138072	0.440462
NA	38.546	59.2138	23.0452	0.389187	-1.36147	0.013781	0.440462
COL5A3	3169.65	1237.17	4619	3.73351	1.90053	0.0138104	0.440462
LRRC32	3873.42	5757.4	2460.44	0.427352	-1.2265	0.0138379	0.440545
ZNF404	110.59	60.0241	148.515	2.47425	1.30699	0.0139011	0.440545
IRF4	14.8309	28.4818	4.59269	0.16125	-2.63263	0.0138628	0.440545
WDR62	581.771	1096.66	195.602	0.178361	-2.48713	0.0138885	0.440545
ANAPC15	137.734	210.47	83.1817	0.395219	-1.33927	0.0138975	0.440545
HIST1H2AI	5.1927	9.74279	1.78013	0.182713	-2.45235	0.0138777	0.440545
NA	23.355	9.07835	34.0625	3.75205	1.90768	0.0139172	0.44059
MARVELD2	72.9612	20.9504	111.969	5.3445	2.41806	0.0139769	0.441547
KIR2DL1	3.92229	8.80919	0.257111	0.0291867	-5.09855	0.0139769	0.441547
PLEKHO1	2064.17	3045.49	1328.18	0.436114	-1.19722	0.0140066	0.441554
SH3BGRL2	107.27	34.3171	161.985	4.72022	2.23886	0.013997	0.441554
NA	13.6002	22.5611	6.87951	0.304927	-1.71346	0.014027	0.441734
PSG6	71.2834	121.388	33.7048	0.277661	-1.8486	0.0140504	0.442005
NA	155.85	231.282	99.2756	0.42924	-1.22014	0.0141338	0.444155
NYX	1.62137	3.78319	0	0	#NAME?	0.014178	0.444155
IGFBP3	245812	148727	318625	2.14234	1.09919	0.0141775	0.444155
SIGLEC12	1.62137	3.78319	0	0	#NAME?	0.014178	0.444155
FASN	9621.52	13857.8	6444.3	0.46503	-1.10461	0.0141941	0.444195
LSM4	4135.61	6163.44	2614.74	0.424233	-1.23707	0.0142311	0.444821
TACC3	1430.24	2451.49	664.308	0.270981	-1.88374	0.0142438	0.444821
CAMK2A	17.8088	28.639	9.68614	0.338216	-1.56398	0.0143053	0.446278
LINC01963	204.721	114.264	272.564	2.38539	1.25422	0.0143258	0.446452
CHRNA9	6.47206	11.7171	2.53825	0.216627	-2.20671	0.0143967	0.448196
PITPNC1	697.818	1007.67	465.432	0.461892	-1.11437	0.0144561	0.44958
KIF18B	571.064	994.423	253.546	0.254968	-1.97161	0.0145641	0.45247
NA	1.59168	3.71393	0	0	#NAME?	0.0146013	0.453156
MYOM1	72.6382	19.0797	112.807	5.91241	2.56375	0.0146621	0.453956
MAPKAPK3	2930.39	4298.29	1904.47	0.443076	-1.17437	0.0146648	0.453956
SLC30A10	2.08197	4.85792	0	0	#NAME?	0.0146726	0.453956
CALML6	23.8352	11.399	33.1624	2.90923	1.54064	0.0147876	0.455167
CYP24A1	45.3382	105.446	0.257111	0.00243831	-8.6799	0.0147819	0.455167
ARHGAP44	40.3858	61.4768	24.5676	0.399624	-1.32329	0.0147616	0.455167
TCF19	597.78	967.562	320.444	0.331188	-1.59428	0.014777	0.455167
DEPTOR	872.279	377.811	1243.13	3.29035	1.71824	0.0147556	0.455167
NPIPA7	4.32644	0	7.57126	Inf	Inf	0.0148328	0.456088
C1S	16094	9456.19	21072.4	2.22842	1.15602	0.0149082	0.457939
ST3GAL4	1216.89	1770.87	801.399	0.452545	-1.14387	0.0150817	0.4581
B9D2	159.642	235.668	102.622	0.435451	-1.19942	0.0150984	0.4581
ACOT7	2148.77	3336.34	1258.1	0.377091	-1.40702	0.015001	0.4581
FAM110A	283.276	438.61	166.775	0.380235	-1.39504	0.0151828	0.4581
LPAR4	4.45361	8.34868	1.53231	0.18354	-2.44584	0.0149665	0.4581
PTPRQ	88.523	43.6855	122.151	2.79614	1.48344	0.0151885	0.4581
BIRC5	322.679	585.657	125.445	0.214196	-2.223	0.0150724	0.4581
INSIG2	983.414	558.966	1301.75	2.32886	1.21962	0.0149921	0.4581
GLIPR2	1945.95	2841.24	1274.48	0.448564	-1.15662	0.0150852	0.4581
TNNT1	32.5517	68.4711	5.61207	0.0819627	-3.60889	0.0149908	0.4581
PFKP	7669.92	11876	4515.38	0.380212	-1.39513	0.0151355	0.4581
NTNG1	324.599	544.181	159.912	0.293858	-1.76681	0.015009	0.4581
FLT4	9.78796	17.7662	3.80426	0.214129	-2.22345	0.0150852	0.4581
FAM182A	4.54075	0.813999	7.33582	9.01207	3.17186	0.0151335	0.4581
GTF2IRD2	190.818	107.106	253.602	2.36777	1.24353	0.0150856	0.4581
BTNL2	1.55444	3.62702	0	0	#NAME?	0.015164	0.4581
SPATA31E1	1.55444	3.62702	0	0	#NAME?	0.015164	0.4581
NA	6.93536	1.71491	10.8507	6.32727	2.66158	0.0150592	0.4581
ABCA4	19.9613	9.53499	27.781	2.91359	1.5428	0.0152226	0.458668
CENPU	408.728	652.793	225.68	0.345714	-1.53235	0.0152485	0.458985
LOC101927943	38.6884	20.0424	52.6728	2.62807	1.394	0.0153153	0.460534
ARHGAP33	289.695	486.071	142.414	0.292989	-1.77108	0.0153746	0.461168
LOC100507487	25.176	11.8994	35.1335	2.95255	1.56196	0.0153825	0.461168
RPL39L	489.623	763.377	284.307	0.372434	-1.42494	0.0153695	0.461168
FAM212B	662.399	368.103	883.122	2.39912	1.2625	0.0154568	0.461328
PTPRM	5724.91	3298.82	7544.48	2.28703	1.19347	0.0154501	0.461328
PBK	712.019	1117.74	407.731	0.364783	-1.45489	0.015465	0.461328
ATP2A1-AS1	25.5621	45.4742	10.628	0.233716	-2.09717	0.0154422	0.461328
KCNA7	16.2696	26.0562	8.92956	0.342703	-1.54497	0.0154236	0.461328
NA	6.1702	11.6963	2.0256	0.173182	-2.52964	0.0154802	0.461328
SECTM1	1072.84	633.069	1402.66	2.21565	1.14773	0.0155564	0.461764
TNFAIP2	1834.85	1031.22	2437.57	2.36377	1.24109	0.0155155	0.461764
NA	3.0234	0	5.29095	Inf	Inf	0.0155418	0.461764
NA	12.6135	3.53307	19.4238	5.49772	2.45883	0.0155462	0.461764
CBX3P2	11.2575	4.35281	16.436	3.77594	1.91684	0.0155874	0.461768
GLCCI1	187.524	96.3211	255.927	2.65702	1.40981	0.0155751	0.461768
NA	11.8773	4.79796	17.1868	3.58211	1.84081	0.0156258	0.462401
C19orf18	11.207	4.23192	16.4384	3.88438	1.95768	0.0156396	0.462401
FST	10415	5210.45	14318.3	2.748	1.45838	0.0156686	0.462803
NA	13.6235	5.81977	19.4762	3.34656	1.74268	0.015707	0.463479
LOC101929709	108.772	60.7387	144.798	2.38395	1.25335	0.0157668	0.463875
ESPL1	496.15	866.447	218.426	0.252094	-1.98797	0.0157649	0.463875
VEGFA	4475.6	2674.71	5826.27	2.17828	1.12319	0.0157523	0.463875
CUTA	7042.66	10385.3	4535.71	0.436745	-1.19514	0.0157916	0.464148
LOC105370941	21.8504	10.0472	30.7027	3.05583	1.61157	0.0158996	0.466865
ITGB8	86.2029	48.0756	114.798	2.38787	1.25573	0.0159155	0.466875
DLEU2	86.7669	129.034	55.0666	0.42676	-1.2285	0.0159465	0.467327
SLC30A4	378.409	192.748	517.655	2.68566	1.42528	0.0159974	0.468362
NA	76.6456	141.092	28.3107	0.200654	-2.31722	0.0160446	0.468828
LOC101929415	15.5227	3.87941	24.2552	6.25229	2.64438	0.0160402	0.468828
NA	36.6469	18.7423	50.0753	2.67179	1.41781	0.0161341	0.470985
NPIPA1	8.31487	2.84126	12.4201	4.37132	2.12807	0.016156	0.471164
ZGLP1	19.8481	9.53369	27.5839	2.89331	1.53272	0.0161878	0.471634
LINC00882	39.6433	20.9844	53.6376	2.55607	1.35393	0.0162401	0.472697
KLHL6	6.91007	13.3887	2.05107	0.153193	-2.70657	0.0163491	0.475408
NFIA	369.104	179.451	511.344	2.84948	1.5107	0.0165208	0.47716
DDX60L	700.751	404.051	923.276	2.28505	1.19223	0.0165101	0.47716
PLAUR	1718.28	2487.12	1141.65	0.459025	-1.12336	0.016494	0.47716
SLC7A8	1574.82	2556.14	838.834	0.328164	-1.60751	0.0164289	0.47716
CD79B	20.7178	41.904	4.82817	0.11522	-3.11754	0.0164662	0.47716
CGB8	3.56269	6.94168	1.02844	0.148155	-2.75482	0.0164497	0.47716
TRIM14	444.938	642.822	296.525	0.461286	-1.11627	0.0165205	0.47716
NA	61.572	33.3068	82.7708	2.4851	1.31331	0.0165589	0.4778
CAMK2N2	51.134	93.7049	19.2058	0.20496	-2.28658	0.0166569	0.47985
GPSM3	349.444	538.796	207.43	0.384988	-1.37712	0.0166619	0.47985
TIPARP	3159.94	1890.6	4111.94	2.17494	1.12097	0.0169106	0.481708
SCNN1B	2.16195	4.70174	0.257111	0.0546842	-4.19273	0.016747	0.481708
NA	10.8598	17.8943	5.58388	0.312048	-1.68016	0.0169353	0.481708
ARHGAP27	269.75	386.428	182.242	0.471606	-1.08435	0.0168794	0.481708
ZNF396	28.0461	9.88749	41.6651	4.21392	2.07516	0.0167883	0.481708
FZD3	48.2986	74.5772	28.5896	0.383356	-1.38324	0.0169043	0.481708
OMD	251.708	9.97667	433.007	43.4019	5.43969	0.0169096	0.481708
SLC12A7	393.634	560.739	268.305	0.478484	-1.06346	0.0169336	0.481708
NA	64.6062	35.0394	86.7813	2.47668	1.30841	0.0168696	0.481708
DCX	6.63602	12.7415	2.05689	0.161432	-2.631	0.0169193	0.481708
NPM3	830.008	1298.06	478.97	0.36899	-1.43835	0.0168722	0.481708
NPR1	15.8123	7.21875	22.2575	3.08329	1.62447	0.0168067	0.481708
REEP6	160.03	236.679	102.543	0.433256	-1.20671	0.016894	0.481708
INCENP	910.216	1348.2	581.726	0.431483	-1.21263	0.0169615	0.481995
NA	88.7547	41.3286	124.324	3.00818	1.58889	0.0170109	0.482593
PCDHGB7	463.202	269.438	608.525	2.2585	1.17536	0.0170147	0.482593
CDCA8	749.817	1371.76	283.359	0.206566	-2.27532	0.0170943	0.482754
FGFR2	266.997	586.817	27.1316	0.0462352	-4.43487	0.0170432	0.482754
NA	19.7593	0.698844	34.0547	48.73	5.60674	0.0170755	0.482754
KNL1	488.17	730.537	306.395	0.419411	-1.25356	0.0170537	0.482754
ASF1B	866.895	1648.4	280.766	0.170326	-2.55363	0.0171009	0.482754
HGH1	102.71	151.628	66.0208	0.435414	-1.19954	0.0171681	0.484196
STIL	312.892	456.217	205.398	0.450221	-1.15129	0.0172007	0.484657
KIF5A	17.9407	36.0949	4.32508	0.119825	-3.061	0.0172381	0.485255
GAS7	487.904	771.002	275.58	0.357431	-1.48426	0.0172559	0.485303
ADGRL4	856.866	408.526	1193.12	2.92055	1.54624	0.0173479	0.487431
P2RY14	1.42757	3.33101	0	0	#NAME?	0.0173871	0.487961
NA	33.3565	17.4077	45.3181	2.60334	1.38036	0.0173993	0.487961
RNF152	232.582	334.566	156.094	0.466555	-1.09988	0.0174776	0.487987
NT5M	64.8392	96.924	40.7757	0.420697	-1.24915	0.0174816	0.487987
STK33	4.96034	9.21203	1.77158	0.192312	-2.37848	0.0174507	0.487987
TAS2R10	2.17373	0	3.80402	Inf	Inf	0.0174801	0.487987
NA	3.04862	0.340602	5.07964	14.9137	3.89857	0.0174677	0.487987
STON2	34.5619	69.4327	8.40877	0.121107	-3.04565	0.0175281	0.488829
PLA2R1	1125.38	645.859	1485.03	2.29931	1.2012	0.0175957	0.489351
IGF2-AS	18.1539	0.716485	31.232	43.5905	5.44594	0.0175698	0.489351
CCNF	547.015	1011.97	198.299	0.195954	-2.35141	0.0175905	0.489351
NA	4.50069	1.07473	7.07016	6.57856	2.71777	0.0176392	0.490106
LINC01089	186.881	108.175	245.911	2.27326	1.18476	0.0176611	0.490259
NA	25.5977	12.7778	35.2126	2.75577	1.46245	0.0177034	0.490768
TSPAN8	166.419	27.5211	270.593	9.8322	3.29751	0.0177122	0.490768
CEP126	371.97	215.3	489.471	2.27344	1.18487	0.0177709	0.491034
DOPEY2	560.025	808.467	373.693	0.462225	-1.11333	0.0177642	0.491034
C12orf75	15383.7	22133.1	10321.8	0.466351	-1.10051	0.0177709	0.491034
C3AR1	5.76986	11.0633	1.79978	0.16268	-2.61989	0.0178098	0.491204
LOC101927708	2.96179	6.91084	0	0	#NAME?	0.0177964	0.491204
KCND1	59.757	94.2641	33.8766	0.35938	-1.47642	0.0178363	0.491481
MMP16	310.859	449.323	207.011	0.460718	-1.11804	0.0179078	0.491643
ABCA8	568.763	159.269	875.883	5.49941	2.45928	0.0178968	0.491643
CBR3	358.066	558.2	207.965	0.372564	-1.42444	0.0179018	0.491643
NA	6078.3	10830.6	2514.05	0.232124	-2.10703	0.0178607	0.491643
G0S2	45.0598	67.6712	28.1012	0.415261	-1.26791	0.017944	0.491731
LOC155060	74.2272	40.5901	99.455	2.45023	1.29292	0.0179283	0.491731
CHST13	5.312	9.68542	2.03193	0.209792	-2.25297	0.0179601	0.491731
NA	5.31467	1.31078	8.31758	6.34553	2.66574	0.018031	0.492322
GINS3	181.655	279.35	108.384	0.387987	-1.36592	0.0180127	0.492322
HSD17B7	204.983	293.223	138.802	0.473366	-1.07897	0.0180225	0.492322
PAIP2B	23.3346	36.561	13.4149	0.366918	-1.44647	0.0180663	0.492767
NA	11.27	0.681203	19.2116	28.2025	4.81775	0.0180802	0.492767
ANKDD1B	5.7454	1.59975	8.85464	5.535	2.46858	0.0181135	0.493228
FAM57A	1786.34	2592.04	1182.07	0.456038	-1.13277	0.0181613	0.494079
NA	6.40194	1.43297	10.1287	7.06831	2.82137	0.0182237	0.495327
NA	87.1381	47.687	116.726	2.44776	1.29146	0.0183344	0.49564
PKP1	5.84028	10.934	2.02001	0.184746	-2.43638	0.0182695	0.49564
NA	5.6956	1.4952	8.84589	5.91618	2.56467	0.0182804	0.49564
TLE6	9.275	15.5864	4.54148	0.291375	-1.77905	0.0183081	0.49564
SPC25	336.337	569.702	161.312	0.283152	-1.82035	0.0183187	0.49564
MBL1P	77.3958	15.8825	123.531	7.77781	2.95936	0.0182941	0.49564
NA	6.74241	11.6973	3.02622	0.258711	-1.95059	0.0184443	0.498162
IL1RAP	835.704	498.27	1088.78	2.18512	1.12771	0.0185049	0.498899
CYP4B1	6.42493	13.2912	1.2752	0.0959432	-3.38168	0.0184941	0.498899
MAP1A	7073.42	10304.8	4649.93	0.451241	-1.14803	0.0185475	0.49915
CLDN9	1.62893	3.80083	0	0	#NAME?	0.0185308	0.49915
ZNF703	3224.33	5638.24	1413.89	0.250767	-1.99558	0.0185751	0.499445
CDCA3	889.189	1625.42	337.014	0.20734	-2.26993	0.0186608	0.501009
EIF5A	18085.7	26092.4	12080.6	0.462994	-1.11093	0.0186667	0.501009
NA	1045.14	611.95	1370.03	2.23879	1.16272	0.0187407	0.501319
NA	9.22041	3.27938	13.6762	4.17036	2.06017	0.0188232	0.501319
EBP	916.332	1317.61	615.369	0.467033	-1.0984	0.0187758	0.501319
TBC1D8	748.777	437.962	981.889	2.24195	1.16475	0.0187747	0.501319
NA	14.0809	24.6916	6.12297	0.247978	-2.01172	0.0187714	0.501319
NA	511.318	89.1946	827.911	9.28208	3.21445	0.0188282	0.501319
ACVR2A	455.33	260.367	601.552	2.3104	1.20815	0.0188229	0.501319
TPD52L1	1521.26	319.172	2422.82	7.59094	2.92428	0.0187356	0.501319
CCDC148	24.6557	8.74923	36.5856	4.18158	2.06405	0.0188287	0.501319
HEATR5A	1089.05	635.815	1428.97	2.24746	1.1683	0.0188963	0.50175
LINC00672	21.3141	9.92505	29.8559	3.00814	1.58887	0.0188899	0.50175
NA	37.6315	19.7843	51.017	2.57866	1.36662	0.0189119	0.50175
GPR17	27.0775	12.911	37.7024	2.92017	1.54605	0.0189093	0.50175
LRP4	1003.73	1419.72	691.74	0.487236	-1.03731	0.0190253	0.503868
NA	26.9582	13.6787	36.9178	2.69893	1.43239	0.0190167	0.503868
MT1M	235.425	420.178	96.8594	0.23052	-2.11704	0.019055	0.504208
SPRN	182.063	261.826	122.24	0.466877	-1.09889	0.0190741	0.50427
GATA6	265.893	91.0277	397.041	4.36176	2.12491	0.0191288	0.504381
CENPX	1673.98	2510.13	1046.87	0.417058	-1.26168	0.019123	0.504381
NA	4.11108	8.57185	0.76551	0.0893052	-3.48511	0.0191048	0.504381
NA	5.98384	10.5943	2.52596	0.238425	-2.06839	0.0191957	0.505256
OVCH2	6.14708	1.53048	9.60953	6.27875	2.65048	0.0191841	0.505256
TBX18	1994.82	986.772	2750.86	2.78774	1.4791	0.0192535	0.506334
RFLNB	3142.18	4533.37	2098.79	0.462963	-1.11103	0.019328	0.507847
AURKB	662.917	1263.67	212.356	0.168047	-2.57306	0.0193789	0.508738
IQGAP3	1083.56	1810.4	538.422	0.297405	-1.7495	0.0193985	0.508809
TH	3.00963	6.00678	0.761765	0.126817	-2.97917	0.0194481	0.509442
SLC7A2	28.0665	7.70146	43.3403	5.62754	2.49251	0.0194567	0.509442
FXYD5	4165.34	5982.26	2802.65	0.468494	-1.0939	0.019497	0.510052
PRR19	31.8603	61.7301	9.45788	0.153213	-2.70639	0.0196323	0.51306
NA	14.9897	6.9814	20.9959	3.0074	1.58852	0.0196462	0.51306
CDH18	11.4662	18.9549	5.84958	0.308605	-1.69617	0.0197302	0.514806
FAM78B	16.5416	30.4972	6.07499	0.199199	-2.32772	0.0197948	0.516041
MFAP4	7612.78	4007.5	10316.7	2.57435	1.36421	0.0198479	0.516978
NA	4.99811	1.17224	7.86751	6.71151	2.74664	0.0199103	0.518153
C1QTNF1	1104.56	428.215	1611.82	3.76405	1.91229	0.0199597	0.518987
PPARGC1B	31.4763	55.37	13.556	0.244826	-2.03017	0.0201157	0.522539
IL27RA	122.19	174.147	83.2216	0.477881	-1.06528	0.0201312	0.522539
NA	303.718	178.488	397.64	2.22783	1.15564	0.0202552	0.52259
CDC14A	74.8808	41.5465	99.8815	2.40409	1.26549	0.0201685	0.52259
GALNT16	116.466	168.483	77.4527	0.459705	-1.12122	0.0202463	0.52259
RRM2	1556.31	2515.19	837.149	0.332837	-1.58711	0.0202116	0.52259
PLTP	715.399	1025.12	483.112	0.471275	-1.08536	0.0202549	0.52259
DTYMK	2600.55	4317.62	1312.74	0.304043	-1.71765	0.0201545	0.52259
NA	7.47784	2.62156	11.1201	4.24178	2.08467	0.0201962	0.52259
RFC2	639.934	975.75	388.073	0.397717	-1.33018	0.0202944	0.522696
NHP2	1997.57	2961.86	1274.35	0.430255	-1.21674	0.0203113	0.522696
FN1	826078	491454	1.07705e+06	2.19155	1.13195	0.0203116	0.522696
CECR6	12.1993	21.688	5.08283	0.234362	-2.09319	0.0203461	0.523136
SCARB1	567.092	809.971	384.933	0.475244	-1.07326	0.0204051	0.524202
CYP3A5	20.7723	32.2381	12.173	0.377596	-1.40508	0.0204234	0.524224
ITGB3	229.423	388.373	110.21	0.283774	-1.81719	0.0204998	0.524462
PTPRN2	36.2219	66.9372	13.1855	0.196983	-2.34386	0.0204996	0.524462
IRAK1	15139.5	21689.7	10226.9	0.471508	-1.08465	0.0205027	0.524462
NA	36.7456	19.3202	49.8147	2.57837	1.36646	0.0204674	0.524462
NA	1.49961	3.49908	0	0	#NAME?	0.0205625	0.525544
DSG2	9.6397	18.4487	3.03293	0.164398	-2.60474	0.0205891	0.525777
NA	2.38903	5.57441	0	0	#NAME?	0.0206848	0.527024
RITA1	876.337	1259.74	588.781	0.467382	-1.09733	0.0206843	0.527024
SH3BP1	90.0733	144.58	49.1935	0.340252	-1.55532	0.0206907	0.527024
ACSF2	609.98	869.985	414.977	0.476992	-1.06796	0.0207267	0.527494
GPR39	14.7689	5.85634	21.4532	3.66325	1.87312	0.0207658	0.528039
FGF23	5.96364	11.8583	1.54267	0.130092	-2.94239	0.0209158	0.530504
DEPDC1-AS1	5.71561	10.3018	2.27596	0.220928	-2.17835	0.0208844	0.530504
LINC01315	5.49084	10.7809	1.52325	0.141291	-2.82325	0.0209103	0.530504
SLC2A12	108.068	42.5215	157.227	3.69759	1.88658	0.0209728	0.530807
ITPRIPL1	28.8107	48.2564	14.2264	0.294808	-1.76215	0.0210517	0.530807
TRIM67	7.14965	13.29	2.54435	0.191448	-2.38498	0.0210492	0.530807
HMGCR	2142.29	3004.36	1495.73	0.497851	-1.00621	0.0210459	0.530807
PGF	619.071	1101.46	257.281	0.233582	-2.098	0.021045	0.530807
PRR15	394.688	25.9108	671.272	25.9071	4.69527	0.0209609	0.530807
C9orf116	124.263	200.931	66.7627	0.332267	-1.58959	0.0209871	0.530807
DEPDC1	435.965	670.939	259.734	0.387119	-1.36915	0.0211267	0.53092
ERCC6L	143.499	224.002	83.1219	0.371076	-1.43021	0.0211333	0.53092
GPR63	31.2394	13.4934	44.549	3.30154	1.72314	0.0210753	0.53092
TLR8	2.57113	5.31368	0.514222	0.0967733	-3.36925	0.0211978	0.53092
CYP1B1-AS1	37.7639	15.7841	54.2488	3.43692	1.78112	0.0211707	0.53092
B4GALNT1	244.241	495.767	55.5973	0.112144	-3.15658	0.0211945	0.53092
NA	18.409	8.53439	25.815	3.02482	1.59685	0.0211346	0.53092
NA	2.57113	5.31368	0.514222	0.0967733	-3.36925	0.0211978	0.53092
NLGN4X	7.04473	12.3917	3.03449	0.24488	-2.02985	0.021283	0.532149
HECW2	737.019	426.294	970.063	2.27557	1.18623	0.0213699	0.532149
NA	4.37762	8.84318	1.02844	0.116298	-3.1041	0.0213712	0.532149
CSF2RB	35.8759	2.75435	60.7171	22.044	4.46232	0.0213661	0.532149
TK1	4526.44	9060.28	1126.06	0.124285	-3.00828	0.021352	0.532149
PDYN	1.46028	3.40731	0	0	#NAME?	0.0213088	0.532149
LPL	5.23571	9.501	2.03673	0.21437	-2.22182	0.0213501	0.532149
SKA1	252.127	411.436	132.645	0.322396	-1.63309	0.0214244	0.533031
NA	31.896	16.8115	43.2094	2.57022	1.36189	0.0214468	0.533147
FPR1	3.36618	6.49523	1.01939	0.156944	-2.67168	0.0214826	0.533595
SOX11	86.1807	200.752	0.252072	0.00125564	-9.63736	0.0215779	0.535075
SLC7A11	3377.67	1473.69	4805.64	3.26095	1.70529	0.0215634	0.535075
NA	575.329	341.027	751.056	2.20233	1.13903	0.0216227	0.535744
LINC01638	104.981	171.178	55.3326	0.323246	-1.6293	0.0216979	0.535831
BASP1	10923.4	15439.8	7536.12	0.488096	-1.03476	0.0216938	0.535831
TUBA1C	7188.01	12142.7	3471.98	0.285931	-1.80626	0.0217156	0.535831
KCNA6	4.83276	11.2764	0	0	#NAME?	0.0216591	0.535831
POC1A	593.04	1044.75	254.26	0.24337	-2.03878	0.0216933	0.535831
IRF5	4.31589	8.03404	1.52728	0.1901	-2.39517	0.0217432	0.53607
SCFD2	1833.98	2621.41	1243.4	0.474327	-1.07605	0.0217842	0.536639
LOC101928659	19.5349	30.3671	11.4108	0.375762	-1.41211	0.0218134	0.536918
PPARG	310.861	187.312	403.523	2.15429	1.10721	0.0220561	0.538041
ACKR1	79.2084	2.60521	136.661	52.4567	5.71305	0.0219056	0.538041
NA	34.6527	18.8256	46.523	2.47126	1.30525	0.0220286	0.538041
NA	82.3135	37.0846	116.235	3.13433	1.64816	0.0219485	0.538041
STEAP4	156.324	10.9112	265.384	24.3223	4.60421	0.0220271	0.538041
GSG2	114.783	184.043	62.8387	0.341435	-1.55032	0.0220539	0.538041
MIR663AHG	2.90881	0.358242	4.82174	13.4594	3.75055	0.0219268	0.538041
GSAP	88.54	49.1034	118.117	2.40549	1.26633	0.0219938	0.538041
LIMD2	897.692	1463.51	473.326	0.323417	-1.62853	0.0220533	0.538041
NA	3.20575	6.45767	0.766804	0.118743	-3.07409	0.0220041	0.538041
CDK1	891.919	1399.89	510.938	0.364983	-1.4541	0.022066	0.538041
SSTR2	4.27153	7.92949	1.52806	0.192706	-2.37553	0.0220744	0.538041
TMEM54	453.996	690.117	276.905	0.401243	-1.31745	0.0221015	0.538172
HMBS	839.748	1240.93	538.86	0.434239	-1.20344	0.0221226	0.538172
CCDC89	79.7357	115.318	53.0488	0.460021	-1.12023	0.0221336	0.538172
MEG3	7911.53	4720.72	10304.6	2.18285	1.12621	0.0221594	0.538362
TIGD2	219.863	127.15	289.397	2.27602	1.18651	0.0222153	0.538847
TLR5	3.78989	7.14245	1.27548	0.178577	-2.48538	0.0222067	0.538847
GATA1	1.41602	3.30406	0	0	#NAME?	0.0222903	0.539357
NXPH4	348.777	509.491	228.241	0.447979	-1.1585	0.0222752	0.539357
NA	44.3353	65.5847	28.3983	0.433003	-1.20755	0.0222818	0.539357
RENBP	734.864	1122.2	444.365	0.395978	-1.33651	0.0223286	0.539848
FAM107A	99.0358	11.0725	165.008	14.9025	3.89748	0.0223959	0.541038
PCDH7	810.354	197.526	1269.97	6.42939	2.68468	0.0224486	0.541876
TMCC2	228.226	343.457	141.802	0.412865	-1.27626	0.0224742	0.542022
LOC100507071	33.4242	17.9908	44.9993	2.50124	1.32264	0.0224908	0.542022
NAT6	286.113	412.114	191.613	0.464952	-1.10485	0.0225691	0.542501
KLHDC1	92.7766	52.5299	122.962	2.34079	1.227	0.0225557	0.542501
ZNF296	30.8964	47.7882	18.2275	0.381422	-1.39054	0.0225831	0.542501
FLRT2	3838.02	2015.53	5204.89	2.58239	1.36871	0.0225557	0.542501
FAM43A	2574.22	1055.46	3713.29	3.51817	1.81482	0.0226357	0.543056
CSMD1	1.4009	3.26877	0	0	#NAME?	0.0226442	0.543056
IGFBP5	4317.48	7944.61	1597.14	0.201035	-2.31448	0.0226606	0.543056
NETO1	50.3322	1.03945	87.3017	83.9887	6.39212	0.022697	0.543495
LEPROT	6432.9	3844.37	8374.29	2.17833	1.12322	0.0227591	0.544548
GRIK2	538.442	293.786	721.935	2.45735	1.2971	0.0227955	0.544984
KCNB1	44.6849	12.4115	68.8899	5.55048	2.47261	0.0228475	0.545161
KREMEN2	37.4654	66.4408	15.7339	0.23681	-2.0782	0.0228575	0.545161
ARHGDIB	563.558	1038.02	207.712	0.200105	-2.32117	0.0228499	0.545161
ANXA3	81.2801	46.5891	107.298	2.30307	1.20356	0.0229355	0.545718
DBF4	265.928	381.248	179.439	0.470662	-1.08724	0.0229308	0.545718
HIST1H2BC	94.5527	42.9998	133.217	3.09809	1.63138	0.0229205	0.545718
NA	4.38889	0.813999	7.07006	8.68558	3.11862	0.0229777	0.545857
NA	12.1142	0	21.1998	Inf	Inf	0.0229626	0.545857
HIST1H2BL	1.38578	3.23349	0	0	#NAME?	0.023008	0.546144
RECQL4	807.847	1380.1	378.658	0.27437	-1.86581	0.0230806	0.547434
LINC02412	2.42627	4.98239	0.509184	0.102197	-3.29058	0.02314	0.548408
RSPO4	355.438	699.245	97.5834	0.139555	-2.84109	0.0232271	0.549755
HOXB8	18.6148	42.4275	0.755158	0.0177988	-5.81208	0.0232335	0.549755
NA	7.11568	0.813999	11.8419	14.5479	3.86273	0.0233563	0.551639
ANGPTL1	169.522	91.2385	228.235	2.50152	1.3228	0.0233661	0.551639
NA	1.37122	3.19951	0	0	#NAME?	0.0233683	0.551639
NPIPA3	4.16054	0.271333	7.07745	26.084	4.70509	0.0234236	0.552509
USP53	1860.47	998.978	2506.58	2.50915	1.3272	0.0234725	0.552793
NA	4.86083	1.24151	7.57532	6.1017	2.60921	0.0234686	0.552793
GNAS-AS1	29.671	45.1703	18.0465	0.399522	-1.32365	0.0235248	0.553591
CDCA5	774.882	1350.05	343.507	0.25444	-1.9746	0.0236159	0.553994
PFN1	38054.9	54915.7	25409.2	0.462695	-1.11187	0.0236057	0.553994
CR1	1.78246	4.15908	0	0	#NAME?	0.0235867	0.553994
MYBPC3	1.78246	4.15908	0	0	#NAME?	0.0235867	0.553994
NETO2	160.755	238.394	102.527	0.430074	-1.21734	0.0237246	0.556109
ASIP	7.33917	12.3458	3.58416	0.290314	-1.78432	0.0237567	0.556427
CHMP4A	24.6384	12.6053	33.6632	2.67056	1.41714	0.0238836	0.558963
NPIPA7	22.6594	11.7101	30.8714	2.6363	1.39852	0.0239207	0.558992
NA	11.8754	24.3393	2.52752	0.103845	-3.26749	0.0239408	0.558992
FZD10	1.34909	3.14788	0	0	#NAME?	0.0239349	0.558992
TNFAIP8L1	253.91	439.089	115.026	0.261965	-1.93255	0.0239699	0.559235
FAM213B	1382.78	2032.3	895.633	0.4407	-1.18213	0.0239901	0.559272
DISP2	167.402	275.68	86.1942	0.31266	-1.67733	0.0240125	0.559358
TUBA3FP	22.1696	33.4704	13.694	0.409137	-1.28934	0.0241362	0.560847
PLP2	3349.9	5245.16	1928.46	0.367664	-1.44354	0.0241302	0.560847
LIG1	600.187	992.342	306.071	0.308433	-1.69697	0.0241205	0.560847
GAS2L3	273.443	390.045	185.992	0.476847	-1.0684	0.0241816	0.560847
DBNDD2	19.3734	8.52379	27.5107	3.22752	1.69043	0.0241525	0.560847
KIF23	1262.15	1799.34	859.262	0.477543	-1.0663	0.0241886	0.560847
NA	39.5529	18.2243	55.5494	3.0481	1.60791	0.0242241	0.561234
VGLL3	10242.8	6146.33	13315.2	2.16636	1.11528	0.024309	0.562767
PLEKHN1	120.791	190.817	68.271	0.357782	-1.48285	0.0245006	0.563546
NA	70.1293	40.1294	92.6291	2.30826	1.2068	0.0244744	0.563546
ACOT11	137.522	214.96	79.4441	0.369576	-1.43606	0.0243854	0.563546
RHOBTB1	1870.38	1103.71	2445.39	2.2156	1.1477	0.0244213	0.563546
DNAJC6	429.143	186.715	610.964	3.27217	1.71025	0.0244723	0.563546
PDE4B	743.955	280.99	1091.18	3.88333	1.95729	0.0245118	0.563546
NA	23.2433	35.3085	14.1944	0.402011	-1.31469	0.0243738	0.563546
TUBG1	2267.04	3418.53	1403.42	0.410533	-1.28443	0.0244092	0.563546
OPCML	42.447	94.2556	3.5905	0.0380932	-4.71432	0.0244749	0.563546
KIF25	2.33417	4.77458	0.50387	0.105532	-3.24425	0.0245418	0.563803
SAPCD2	583.843	1227.44	101.145	0.0824028	-3.60116	0.024581	0.56384
NA	6.60816	1.61739	10.3512	6.39995	2.67806	0.0245622	0.56384
NA	13.7246	3.33101	21.5198	6.46044	2.69163	0.0246632	0.565292
RHOBTB3	4900.99	2972.82	6347.11	2.13505	1.09427	0.0246989	0.565679
TMEM45A	2133.12	1284	2769.95	2.15728	1.10921	0.0247383	0.566149
RAD54B	54.2701	79.9803	34.9874	0.43745	-1.19281	0.0247577	0.56616
RPS2P32	64.8711	102.399	36.7255	0.358653	-1.47934	0.0247871	0.566401
NA	44.9701	24.9039	60.0198	2.41005	1.26906	0.0249406	0.566787
PINLYP	95.1321	137.307	63.5008	0.462472	-1.11256	0.0249536	0.566787
NA	144.434	85.7993	188.41	2.19594	1.13484	0.0249814	0.566787
EGR3	24.4396	41.447	11.684	0.281903	-1.82673	0.0249849	0.566787
LARGE1	770.128	1073.92	542.286	0.504961	-0.985757	0.0249931	0.566787
CORO1A	29.109	59.4456	6.35651	0.10693	-3.22526	0.0249695	0.566787
NA	40.3346	22.2705	53.8827	2.41947	1.27469	0.0248683	0.566787
NA	6.45316	11.3438	2.78514	0.24552	-2.02609	0.024969	0.566787
CDK4	3429.23	4894.47	2330.3	0.476109	-1.07064	0.024889	0.566787
SLC34A2	9.40942	20.2412	1.28556	0.0635117	-3.97683	0.0248328	0.566787
NA	6.80198	11.4732	3.29858	0.287504	-1.79835	0.0250176	0.566914
CNGA3	14.6129	25.2794	6.61306	0.261599	-1.93457	0.0250656	0.567574
RNF217	778.957	461.795	1016.83	2.2019	1.13875	0.0250945	0.567798
CX3CL1	13.083	0	22.8952	Inf	Inf	0.0251482	0.568512
PRKCG	5.54605	9.89323	2.28567	0.231034	-2.11382	0.0252286	0.568512
MTFR2	83.7386	124.732	52.9933	0.424856	-1.23496	0.0251897	0.568512
CHRNA5	14.8094	23.4241	8.34841	0.356403	-1.48842	0.0252162	0.568512
FCGR2B	3.91041	7.41021	1.28556	0.173484	-2.52712	0.0252398	0.568512
TARBP2	1346.19	1921.35	914.815	0.47613	-1.07057	0.0252395	0.568512
PARP15	37.2878	19.8218	50.3872	2.542	1.34597	0.0253847	0.570917
PLK1	1838.39	3578.85	533.042	0.148942	-2.74718	0.0253737	0.570917
LINC01117	14.723	22.8193	8.65082	0.379101	-1.39935	0.0254512	0.571984
FGF13	82.4964	122.457	52.5257	0.42893	-1.22119	0.0254877	0.572375
KCND2	319.846	183.357	422.213	2.30268	1.20332	0.0255428	0.573183
NA	4.74554	8.72099	1.76396	0.202266	-2.30568	0.0255841	0.573251
CXCL12	13128.5	18821.5	8858.75	0.470672	-1.08721	0.0255707	0.573251
GRAMD1B	389.537	545.542	272.534	0.499565	-1.00126	0.0256574	0.574464
NA	98.1637	39.3757	142.255	3.61275	1.8531	0.0257235	0.575086
CRHR1	3.54453	7.24213	0.771333	0.106506	-3.23099	0.0257068	0.575086
FAM66C	142.995	86.23	185.568	2.15201	1.10569	0.0257842	0.576013
GRP	37.8611	87.9998	0.257111	0.00292172	-8.41896	0.025914	0.576372
LPAR1	4789.88	2860.32	6237.05	2.18054	1.12469	0.0259775	0.576372
LOC101929523	84.1643	48.7886	110.696	2.26889	1.18199	0.0260039	0.576372
NA	3.34191	6.43429	1.02262	0.158933	-2.65351	0.0259958	0.576372
NA	6.56909	2.14242	9.88909	4.61585	2.2066	0.0259976	0.576372
RAPH1	1945.92	1142.69	2548.35	2.23013	1.15713	0.0258637	0.576372
FAM222A	71.5264	108.213	44.0114	0.40671	-1.29793	0.0259645	0.576372
KIAA1462	7419.51	3654.25	10243.5	2.80317	1.48706	0.0259127	0.576372
CSGALNACT2	1970.62	1187.19	2558.19	2.15482	1.10757	0.0258374	0.576372
CECR7	186.521	107.296	245.94	2.29217	1.19671	0.0259891	0.576372
BORA	135.851	196.112	90.6556	0.462264	-1.11321	0.0260117	0.576372
AQP9	23.5448	47.1247	5.85989	0.124349	-3.00754	0.0261499	0.578579
C8orf4	25.4558	55.0002	3.29761	0.0599563	-4.05995	0.0261422	0.578579
FOXO1	445.206	228.571	607.682	2.65861	1.41067	0.0261921	0.579086
SCN1B	906.64	1504.21	458.464	0.304788	-1.71412	0.0262847	0.579422
PRIM1	139.76	210.991	86.3366	0.409195	-1.28914	0.02624	0.579422
LINC01021	19.5495	8.0058	28.2073	3.52336	1.81695	0.0262654	0.579422
CENPO	448.589	678.568	276.104	0.406893	-1.29728	0.0262747	0.579422
ARHGAP22	2187.79	3189.23	1436.7	0.450485	-1.15045	0.0263424	0.579714
NA	15.6695	7.27038	21.9688	3.02168	1.59535	0.02635	0.579714
TRHDE	35.2512	79.1674	2.314	0.0292292	-5.09645	0.0263559	0.579714
BTN3A2	601.643	845.702	418.599	0.494972	-1.01458	0.0264293	0.579957
NCAN	3.7841	7.1155	1.28556	0.18067	-2.46857	0.026427	0.579957
HIST2H2AC	21.0839	39.3994	7.34728	0.186482	-2.42289	0.0264443	0.579957
BLVRA	1322.77	1865.74	915.537	0.49071	-1.02706	0.0264075	0.579957
SLC26A6	743.663	453.105	961.581	2.1222	1.08556	0.0264677	0.580046
CLPB	450.063	640.231	307.437	0.480196	-1.0583	0.0265249	0.580873
RTL3	17.4174	27.1217	10.1393	0.373844	-1.41949	0.0265679	0.581287
LOC100130691	36.6481	19.742	49.3278	2.49862	1.32113	0.0265825	0.581287
CGB5	4.11307	9.25434	0.257111	0.0277827	-5.16967	0.0266238	0.581554
NA	648.796	392.526	840.999	2.14253	1.09931	0.0266529	0.581554
RFXANK	1266.94	1842.86	835.004	0.453103	-1.14209	0.0266504	0.581554
TMSB4X	98929.3	138242	69444.5	0.502339	-0.993267	0.0267423	0.581809
ST6GALNAC4	1507.32	2145.23	1028.88	0.479612	-1.06006	0.0267083	0.581809
SLC30A7	1134.82	687.855	1470.04	2.13714	1.09568	0.0267336	0.581809
COQ3	220.058	313.336	150.1	0.479038	-1.06179	0.026742	0.581809
MMP23B	25.6417	13.9491	34.4111	2.46691	1.30271	0.0268158	0.582987
NA	86.8365	49.8907	114.546	2.29593	1.19908	0.0270079	0.586221
CPNE7	1778.49	1085.24	2298.43	2.1179	1.08264	0.0270232	0.586221
NA	73.1207	41.5898	96.7689	2.32675	1.21831	0.0269973	0.586221
ENPP5	146.159	70.9226	202.586	2.85643	1.51422	0.0270973	0.586237
KCNK6	1146.98	688.296	1490.99	2.16621	1.11517	0.0271022	0.586237
AHSA2	1436.56	853.409	1873.93	2.19581	1.13476	0.0270913	0.586237
NA	3.72164	6.99201	1.26887	0.181474	-2.46216	0.0270525	0.586237
NCAPG	601.066	930.877	353.708	0.379973	-1.39603	0.0271368	0.586561
SRRM2-AS1	15.9385	7.83069	22.0193	2.81193	1.49156	0.0272775	0.587226
PTPRF	2934.32	4384.25	1846.87	0.421252	-1.24725	0.0273046	0.587226
SMCO2	3.70149	6.92274	1.28556	0.1857	-2.42895	0.02726	0.587226
IGFBP7	3774.58	1810.31	5247.79	2.89884	1.53547	0.0272329	0.587226
UAP1L1	3213.06	4756.21	2055.69	0.432212	-1.21019	0.027286	0.587226
PPIH	710.432	1013.85	482.872	0.476277	-1.07013	0.0272112	0.587226
SLPI	6.20377	0	10.8566	Inf	Inf	0.0272503	0.587226
NA	3.47546	0.716485	5.54468	7.73873	2.9521	0.0273592	0.587978
NPC1L1	4.09668	7.87171	1.2654	0.160753	-2.63708	0.0274133	0.588719
PSRC1	609.728	1031.26	293.58	0.284681	-1.81258	0.0275028	0.590105
VAT1L	214.668	498.527	1.77403	0.00355855	-8.1345	0.0275369	0.590105
BMP4	620.961	21.4843	1070.57	49.8304	5.63895	0.0275317	0.590105
ACSM3	5.00312	9.98816	1.26434	0.126584	-2.98183	0.027588	0.590777
ADCY4	316.864	61.6576	508.269	8.24341	3.04324	0.027693	0.590983
METRN	4286.4	7100.11	2176.12	0.306491	-1.70609	0.0276691	0.590983
NCAPD2	2429.06	3451.37	1662.33	0.481642	-1.05397	0.0277009	0.590983
C8orf37	86.724	51.093	113.447	2.22041	1.15083	0.0276512	0.590983
ABCA9	152.488	76.4896	209.487	2.73876	1.45352	0.0276724	0.590983
ADGRB1	33.4521	63.5859	10.8518	0.170663	-2.55078	0.0277159	0.590983
AUNIP	55.0319	80.7731	35.7259	0.4423	-1.1769	0.0277715	0.591451
CCND2-AS1	4.70593	1.22387	7.31747	5.97896	2.57989	0.0277773	0.591451
LINC00894	42.93	23.1648	57.754	2.49318	1.31799	0.0278154	0.591841
ACSS3	603.184	365.427	781.501	2.1386	1.09667	0.0281748	0.594041
RIPPLY3	3.15935	6.01609	1.0168	0.169013	-2.56479	0.0281763	0.594041
SH3GL3	2.45141	5.04105	0.509184	0.101007	-3.30747	0.0279904	0.594041
ONECUT2	5.76625	10.7319	2.04201	0.190274	-2.39385	0.0281306	0.594041
PCAT7	5.47824	0.681203	9.07601	13.3235	3.7359	0.0281184	0.594041
MGAT5B	31.7658	61.2982	9.61658	0.156882	-2.67225	0.0281071	0.594041
TACR1	7.00403	14.6492	1.27016	0.0867054	-3.52773	0.0280632	0.594041
SLC39A4	447.671	681.646	272.19	0.399312	-1.32441	0.0281738	0.594041
ERCC6	774.291	311.218	1121.6	3.60389	1.84956	0.0279439	0.594041
NA	2.72145	0.271333	4.55904	16.8024	4.07059	0.0281185	0.594041
NA	4.67318	1.1546	7.31211	6.33302	2.66289	0.0279727	0.594041
NA	2.72311	0.271333	4.56195	16.8131	4.07151	0.0280987	0.594041
SYNE1	3339.57	2023.29	4326.77	2.13848	1.09659	0.0280069	0.594041
LSS	8887.23	12411.9	6243.72	0.503043	-0.991245	0.0283108	0.594534
HIST1H2BN	16.6331	7.74864	23.2964	3.00651	1.58809	0.0283583	0.594534
NA	2.94513	6.18634	0.514222	0.0831222	-3.58862	0.0283434	0.594534
MSX1	2625.88	3705.12	1816.45	0.490256	-1.02839	0.0282394	0.594534
CHKB-AS1	51.3342	74.8442	33.7017	0.450291	-1.15107	0.0282631	0.594534
GLUD2	18.6408	3.84672	29.7364	7.73031	2.95053	0.0283202	0.594534
ARHGEF3	247.522	384.097	145.09	0.377744	-1.40452	0.0282276	0.594534
PAH	2.43217	4.98942	0.514222	0.103062	-3.27841	0.0283011	0.594534
HLA-DRB1	4.11209	8.57986	0.761256	0.0887259	-3.4945	0.0284609	0.596266
HOXB5	120.254	227.985	39.4556	0.173062	-2.53064	0.0285398	0.597502
PTPA	6663.54	9418.34	4597.44	0.488137	-1.03464	0.0286207	0.598778
SLC4A5	5.31766	1.59975	8.10609	5.06709	2.34116	0.028704	0.600102
NBPF3	625.382	388.801	802.817	2.06486	1.04604	0.028954	0.602389
KCTD16	67.4183	12.4482	108.646	8.72782	3.12562	0.0289367	0.602389
HSD3B7	1398.92	1984.92	959.418	0.483353	-1.04885	0.0289178	0.602389
NA	10.155	18.9574	3.55315	0.187428	-2.41559	0.0289377	0.602389
SLC39A2	4.3485	7.76628	1.78517	0.229862	-2.12116	0.0288567	0.602389
CTSV	9.88846	15.9186	5.36582	0.337078	-1.56885	0.0289505	0.602389
LRRC8B	71.707	38.4211	96.6714	2.5161	1.33119	0.0288704	0.602389
FAAP24	162.982	234.111	109.635	0.468304	-1.09448	0.0290682	0.602465
RGCC	686.892	242.273	1020.36	4.2116	2.07437	0.0290344	0.602465
NA	3.00824	6.68312	0.252072	0.0377178	-4.72861	0.0290786	0.602465
FLJ46284	5.23884	1.44357	8.08529	5.60088	2.48565	0.029113	0.602465
TRHDE-AS1	23.1606	52.6702	1.02844	0.0195261	-5.67845	0.0291386	0.602465
N4BP2	351.115	212.46	455.107	2.14208	1.09901	0.0291194	0.602465
NA	30.5406	45.4479	19.3601	0.425984	-1.23113	0.0291236	0.602465
OSBPL7	197.714	279.971	136.022	0.485842	-1.04144	0.0291284	0.602465
FAM20C	5216.71	7398.58	3580.31	0.483918	-1.04716	0.0290949	0.602465
STX6	1784.01	1088.28	2305.82	2.11877	1.08323	0.0292767	0.602675
AGMAT	43.1031	63.0571	28.1376	0.446225	-1.16416	0.0291906	0.602675
HPS5	1932.8	1131.48	2533.78	2.23936	1.16309	0.0292481	0.602675
NA	36.4263	18.2786	50.0371	2.73747	1.45284	0.0292386	0.602675
MGARP	324.153	80.6919	506.748	6.28004	2.65077	0.0292982	0.602675
ZIC1	859.881	1190.35	612.028	0.514157	-0.959718	0.0292784	0.602675
LINC00893	11.5201	5.26076	16.2145	3.08217	1.62395	0.0293095	0.602675
NA	5.85661	10.2868	2.534	0.246336	-2.0213	0.0292371	0.602675
CELSR3	141.665	77.3813	189.878	2.4538	1.29502	0.0293311	0.602705
DSCAM	4.83575	9.91217	1.02844	0.103756	-3.26874	0.0294018	0.603331
ATP23	127.197	181.272	86.6402	0.477956	-1.06505	0.0293845	0.603331
DNM1	1545.67	2544.02	796.912	0.31325	-1.67461	0.0295301	0.603562
NA	245.543	143.167	322.325	2.25139	1.17082	0.0295742	0.603562
PHYHD1	224.534	319.701	153.158	0.479067	-1.0617	0.0295525	0.603562
HMGN2	9993.72	14114.6	6903.06	0.489072	-1.03188	0.0295203	0.603562
C14orf37	450.338	700.426	262.772	0.37516	-1.41442	0.029562	0.603562
NA	152.22	225.345	97.3754	0.432116	-1.21051	0.0295326	0.603562
NOS3	51.4609	97.6874	16.791	0.171885	-2.54048	0.0294512	0.603562
ATP5G1	2168.3	3124.65	1451.04	0.464386	-1.1066	0.0295497	0.603562
RNF217-AS1	18.6193	8.97251	25.8544	2.88151	1.52683	0.0297924	0.605132
NBEA	312.398	185.716	407.41	2.19373	1.13338	0.0297766	0.605132
ACSM5	16.0319	6.02799	23.5349	3.90426	1.96505	0.0297098	0.605132
PARD6G-AS1	23.468	35.1157	14.7323	0.419537	-1.25313	0.0297618	0.605132
FGF17	3.58728	0.611935	5.8188	9.50885	3.24927	0.0296748	0.605132
ZNF667-AS1	411.129	595.309	272.994	0.458575	-1.12477	0.0297397	0.605132
PNMA2	300.468	26.3021	506.092	19.2415	4.26615	0.0297492	0.605132
DMGDH	130.222	68.3988	176.589	2.58175	1.36835	0.0299552	0.605364
BZW2	877.478	1235.82	608.72	0.492562	-1.02162	0.0298972	0.605364
HS3ST2	22.9029	35.2572	13.6372	0.386791	-1.37037	0.0298258	0.605364
KIF22	1553.02	2628.34	746.535	0.284033	-1.81587	0.0299346	0.605364
SMG1P7	183.67	111.95	237.459	2.12111	1.08482	0.0299653	0.605364
ZNF493	118.576	69.3107	155.525	2.24388	1.166	0.0299028	0.605364
SLC7A7	121.51	71.0477	159.357	2.24295	1.1654	0.0299206	0.605364
DCN	64182.9	38729.9	83272.6	2.15008	1.10439	0.0299395	0.605364
IDI1	1814.4	2500.82	1299.58	0.519662	-0.944355	0.0300144	0.605948
ALDH3A1	94.5533	15.0918	154.149	10.2141	3.3525	0.0300557	0.606373
MZT2A	2917.64	4536.79	1703.28	0.375437	-1.41336	0.030132	0.607503
DALRD3	1085.62	1540.53	744.44	0.483236	-1.0492	0.0301585	0.607629
RPSA	45983.8	66570.9	30543.5	0.458811	-1.12403	0.0302005	0.607659
HRCT1	248.661	145.478	326.048	2.24122	1.16428	0.0301853	0.607659
LRRC71	5.68973	10.9248	1.76345	0.161417	-2.63113	0.0303084	0.60942
QPCTL	667.813	943.306	461.193	0.488912	-1.03235	0.0303506	0.609859
NA	2.88706	5.72355	0.759687	0.13273	-2.91343	0.0304184	0.610403
FCRLB	193.873	318.454	100.438	0.315392	-1.66478	0.0304135	0.610403
SCN4B	2.88327	5.70591	0.766295	0.134298	-2.89649	0.0304727	0.611084
SF3B5	4175.12	6048.29	2770.24	0.45802	-1.12652	0.0305268	0.611351
PLB1	23.2127	35.1903	14.2295	0.404358	-1.30629	0.0305216	0.611351
NPAS2	619.002	283.171	870.876	3.07544	1.6208	0.0306178	0.612357
PTMA	19476.2	27481.1	13472.5	0.490245	-1.02842	0.0306115	0.612357
VSNL1	10.2048	2.3092	16.1265	6.9836	2.80397	0.0307274	0.61272
GABRA6	6.03584	13.0552	0.771333	0.0590826	-4.08112	0.0306828	0.61272
GSDMB	134.862	82.5449	174.1	2.10915	1.07666	0.0307263	0.61272
AMY2B	46.9446	25.5781	62.9695	2.46185	1.29975	0.0307339	0.61272
TNS1	5756.71	7984.76	4085.67	0.511684	-0.966675	0.0307382	0.61272
MROH8	47.9256	28.2291	62.6979	2.22104	1.15124	0.0308279	0.613764
IL33	7.77849	13.7127	3.32784	0.242683	-2.04285	0.0308315	0.613764
NMRAL2P	146.722	77.5475	198.603	2.56104	1.35673	0.0308564	0.613851
WDR97	14.3139	6.46828	20.1981	3.12264	1.64277	0.0309212	0.614733
NA	4.98739	8.9394	2.02338	0.226344	-2.14341	0.0309843	0.61558
CFTR	4.83821	9.91791	1.02844	0.103696	-3.26957	0.0310304	0.615948
AHR	2385.63	1229.93	3252.4	2.64438	1.40293	0.0310477	0.615948
DLX2	122.624	215.049	53.3057	0.247877	-2.0123	0.0310645	0.615948
NA	11.2117	0	19.6206	Inf	Inf	0.0311945	0.617905
NA	172.41	273.307	96.7378	0.353952	-1.49837	0.0313608	0.617905
WNT7B	11.8602	25.637	1.52755	0.0595839	-4.06893	0.0312483	0.617905
OR2AE1	1.91849	4.14144	0.251288	0.0606766	-4.04272	0.031388	0.617905
FAM221A	11.8889	4.19793	17.6571	4.20615	2.0725	0.0312986	0.617905
PAX9	50.4566	21.7499	71.9867	3.30975	1.72672	0.0313421	0.617905
EZH2	511.92	727.527	350.214	0.481376	-1.05476	0.0313237	0.617905
SPINT2	209.126	79.5966	306.273	3.84782	1.94404	0.0312557	0.617905
SIX2	200.979	22.4345	334.888	14.9274	3.89989	0.0313899	0.617905
INPP5J	11.9869	19.2098	6.56976	0.342	-1.54793	0.031309	0.617905
NA	26.4819	43.2368	13.9157	0.32185	-1.63554	0.0313362	0.617905
SYBU	355.76	144.319	514.341	3.56392	1.83347	0.0314406	0.618486
KLHL13	38.3663	15.0883	55.8249	3.69988	1.88748	0.0314963	0.618486
ARHGAP11A	1066.15	1508.28	734.549	0.48701	-1.03798	0.0315019	0.618486
LACC1	624.805	380.855	807.768	2.12093	1.0847	0.0314748	0.618486
NA	24.3306	36.5438	15.1708	0.415141	-1.26833	0.0316495	0.619355
FBN2	7847.96	581.548	13297.8	22.8661	4.51514	0.0316034	0.619355
REPS2	63.9631	32.6187	87.4713	2.68163	1.42311	0.0315686	0.619355
NA	14.9453	23.0367	8.87668	0.385328	-1.37584	0.0316462	0.619355
KPNA2	4163.25	5879.5	2876.06	0.489168	-1.0316	0.0316168	0.619355
PSMG3-AS1	656.858	403.012	847.243	2.10228	1.07195	0.0318237	0.619475
RPL8	57131.7	81516.3	38843.1	0.476507	-1.06943	0.0317504	0.619475
GIMAP5	1.3682	3.19247	0	0	#NAME?	0.031695	0.619475
NA	13.357	22.0089	6.86805	0.312058	-1.68011	0.0317013	0.619475
PEG3	17.146	29.1959	8.10859	0.27773	-1.84824	0.0318171	0.619475
FRZB	266.647	29.9401	444.177	14.8355	3.89098	0.0318075	0.619475
LY6G6C	5.05012	0	8.83771	Inf	Inf	0.031814	0.619475
TMEM256	64.7281	93.2506	43.3362	0.464728	-1.10554	0.0317702	0.619475
STAP2	137.861	194.818	95.1429	0.488368	-1.03396	0.0318416	0.619475
NA	9.72755	1.85344	15.6331	8.43463	3.07633	0.0320225	0.620578
RAD51	282.624	425.762	175.27	0.411662	-1.28047	0.0320089	0.620578
TUBB3	33.0727	50.4274	20.0566	0.397733	-1.33013	0.0319819	0.620578
EFHD2	3434.16	5141.99	2153.29	0.418766	-1.25578	0.0320073	0.620578
NA	1.89214	4.07217	0.257111	0.0631386	-3.98533	0.031978	0.620578
NA	9.61498	15.3186	5.33726	0.348417	-1.52111	0.0319739	0.620578
GGT5	1345.6	142.292	2248.07	15.799	3.98176	0.0320933	0.621549
NA	15.5615	5.68697	22.9674	4.0386	2.01386	0.0322223	0.622839
FEN1	830.101	1175.33	571.179	0.485973	-1.04105	0.0322016	0.622839
LINC01050	1.29918	3.03143	0	0	#NAME?	0.0321961	0.622839
LOC103344931	168.771	102.051	218.811	2.14413	1.10039	0.0322779	0.623513
MIS18A	356.217	503.049	246.093	0.489204	-1.03149	0.0323216	0.623954
COMMD4	2583.19	3641.48	1789.48	0.491415	-1.02499	0.0324105	0.624018
LY6E	10279.4	15587.4	6298.35	0.404067	-1.30733	0.0323463	0.624018
HIST1H4H	129.349	53.768	186.034	3.45995	1.79075	0.0324619	0.624018
NA	4.60846	1.32842	7.06849	5.32098	2.41169	0.0324914	0.624018
LRFN2	1.29218	3.01508	0	0	#NAME?	0.0324278	0.624018
DGKH	139.175	193.622	98.3396	0.507894	-0.977399	0.0324894	0.624018
TDRKH	45.5272	66.3864	29.8828	0.450134	-1.15157	0.0324426	0.624018
MYH7	3.6975	6.91343	1.28556	0.18595	-2.42701	0.0324814	0.624018
NA	2.9399	6.18862	0.503361	0.0813365	-3.61995	0.0325176	0.624121
LGALS1	129379	207065	71114	0.343438	-1.54188	0.0325592	0.624519
PAK3	11.5498	18.2035	6.55954	0.360346	-1.47255	0.0326245	0.624546
C19orf70	3764.99	5382.33	2551.98	0.47414	-1.07661	0.0326439	0.624546
FHL1	14998.5	6664.72	21248.9	3.18826	1.67277	0.032633	0.624546
CHTF18	631.939	1111.5	272.271	0.244959	-2.02939	0.0325961	0.624546
NA	5.59816	10.7024	1.77001	0.165385	-2.5961	0.0326693	0.624635
UGT1A4	1.27706	2.9798	0	0	#NAME?	0.0329387	0.624651
ARMC6	1447.77	2056.9	990.924	0.481755	-1.05363	0.0329411	0.624651
HMGCS1	1833.51	2792.64	1114.17	0.398967	-1.32566	0.0327124	0.624651
PTER	405.31	250.749	521.231	2.07869	1.05568	0.0327422	0.624651
LOC105378668	2.73225	5.35956	0.761765	0.142132	-2.8147	0.0327932	0.624651
C20orf27	2843.6	4535.96	1574.33	0.347077	-1.52667	0.0328603	0.624651
EFHB	28.5171	15.8079	38.0489	2.40695	1.26721	0.032909	0.624651
SGCE	2747.28	1726.31	3513.02	2.03498	1.02502	0.0328792	0.624651
EXTL1	93.8576	163.796	41.4041	0.252779	-1.98405	0.0328418	0.624651
FAM83G	1099.93	1576.58	742.436	0.470914	-1.08646	0.0328204	0.624651
SOAT2	5.96116	10.8704	2.2792	0.209669	-2.25381	0.0328144	0.624651
SLC16A2	1567.59	2190.1	1100.72	0.502588	-0.992552	0.0328575	0.624651
TMEM158	313.753	596.058	102.024	0.171165	-2.54654	0.0327753	0.624651
PTX3	12565	6463.71	17141	2.65188	1.40702	0.0329872	0.624735
AUTS2	549.036	764.07	387.761	0.507494	-0.978538	0.0329835	0.624735
MUC12	6.88367	12.6767	2.53889	0.20028	-2.31991	0.0331345	0.626339
MCM10	193.214	283.388	125.583	0.443148	-1.17414	0.0331309	0.626339
NA	1.844	3.96762	0.251288	0.0633348	-3.98086	0.0331092	0.626339
SLC16A9	8.04831	13.0389	4.30534	0.330191	-1.59863	0.0332225	0.626815
GS1-124K5.4	40.0923	59.0938	25.8413	0.437292	-1.19333	0.0332161	0.626815
NA	7.90556	12.9975	4.0866	0.314414	-1.66926	0.0331881	0.626815
TCERG1L	1.83276	3.93363	0.257111	0.0653623	-3.9354	0.0333839	0.629465
NA	1.82943	3.93363	0.251288	0.063882	-3.96845	0.033466	0.630231
NA	183.963	259.154	127.57	0.492253	-1.02253	0.0334666	0.630231
FBXO41	108.609	155.456	73.4738	0.472635	-1.0812	0.0334913	0.630302
SLC18A2	149.081	91.1747	192.51	2.11144	1.07823	0.0335516	0.63104
ABCB1	11.1747	17.9507	6.09265	0.339411	-1.55889	0.0336298	0.632114
SYNDIG1	189.836	383.611	44.505	0.116016	-3.10761	0.0336623	0.632329
IDH3G	2645.61	3709.94	1847.35	0.497946	-1.00594	0.0337158	0.63282
NA	135.349	43.9994	203.861	4.63327	2.21203	0.0337307	0.63282
MYBPH	3.51548	7.52319	0.509693	0.0677495	-3.88365	0.0338164	0.633514
NA	149.164	89.9477	193.576	2.15209	1.10574	0.0338311	0.633514
NIPAL2	1819.63	1113.78	2349.03	2.10906	1.0766	0.033806	0.633514
IFI27L1	430.881	599.924	304.099	0.506896	-0.980239	0.0340853	0.63373
LAMA5	351.511	107.892	534.225	4.95149	2.30786	0.0338802	0.63373
TDRD6	13.4846	4.48561	20.2339	4.51085	2.1734	0.0339129	0.63373
NA	189.604	117.111	243.973	2.08326	1.05884	0.0342042	0.63373
NACAD	315.355	541.779	145.537	0.268628	-1.89632	0.0342152	0.63373
AJAP1	53.7972	117.74	5.84052	0.0496054	-4.33336	0.0341721	0.63373
SLC6A4	5.80196	10.1363	2.55119	0.251688	-1.99029	0.0341425	0.63373
CDC45	438.896	786.711	178.035	0.226303	-2.14367	0.0339609	0.63373
FSTL1	104804	66223.4	133740	2.01953	1.01402	0.0340483	0.63373
NXPE2	3.26632	0.542666	5.30906	9.78329	3.29032	0.0342055	0.63373
LFNG	427.319	744.376	189.527	0.254612	-1.97363	0.0341808	0.63373
HSD52	4.15649	0.271333	7.07035	26.0578	4.70364	0.0342231	0.63373
OR5A1	1.32942	3.10199	0	0	#NAME?	0.0340428	0.63373
PDX1	1.81008	3.88071	0.257111	0.0662537	-3.91586	0.0339511	0.63373
JAZF1	972.435	599.347	1252.25	2.08936	1.06306	0.0340037	0.63373
ITGB2	1313.21	265.048	2099.33	7.92057	2.9856	0.0341717	0.63373
PAFAH1B3	307.078	581.606	101.182	0.17397	-2.52309	0.0341796	0.63373
ARHGAP6	136.811	84.189	176.278	2.09383	1.06615	0.0341643	0.63373
IGF1	25.2541	40.3591	13.9253	0.345035	-1.53519	0.0342843	0.634471
LCP1	20.5574	38.7695	6.89841	0.177934	-2.49059	0.0343209	0.634756
GOLGA8A	659.959	342.501	898.052	2.62204	1.39069	0.0343716	0.635303
MOCOS	1374.95	879.615	1746.44	1.98546	0.989476	0.0344223	0.635456
KCNE1	6.01042	10.2974	2.79522	0.27145	-1.88124	0.0344191	0.635456
NA	5.63491	1.69727	8.58814	5.05998	2.33913	0.0344532	0.635635
EHD3	1648.34	2340.78	1129	0.48232	-1.05194	0.0345606	0.637225
RAB15	413.933	576.011	292.374	0.507584	-0.978281	0.0346498	0.638084
STAC3	32.8779	18.7374	43.4832	2.32067	1.21454	0.0346303	0.638084
RPS6KB2	1488.77	2282.86	893.198	0.391262	-1.35379	0.0346953	0.63853
NA	14.7421	7.07318	20.4938	2.8974	1.53476	0.0347401	0.638962
MGMT	1121.25	1571.98	783.201	0.498225	-1.00513	0.0349003	0.639011
PALLD	16987.3	10518.3	21839	2.07629	1.05401	0.0348036	0.639011
HIST2H2BE	321.062	196.388	414.568	2.11096	1.0779	0.0349102	0.639011
TUBB	56041.2	78702	39045.7	0.496121	-1.01124	0.0349346	0.639011
CERKL	669.424	398.251	872.804	2.19159	1.13198	0.0347673	0.639011
NA	426.962	599.254	297.743	0.496857	-1.0091	0.0349214	0.639011
LINC01125	23.9678	12.7884	32.3523	2.52982	1.33903	0.0349026	0.639011
NA	33.7464	18.9526	44.8418	2.36599	1.24244	0.0348153	0.639011
MRPL23	2195.52	3307.88	1361.26	0.41152	-1.28097	0.0348314	0.639011
NA	12.3562	0.542666	21.2163	39.0964	5.28896	0.034979	0.639062
NA	2.60601	0.340602	4.30507	12.6396	3.65988	0.0350346	0.639062
SLC25A39	5027.39	7069.84	3495.55	0.494432	-1.01616	0.0350595	0.639062
NA	910.094	1735.21	291.253	0.167848	-2.57477	0.0350759	0.639062
DIRAS1	1782.94	2814.65	1009.15	0.358537	-1.47981	0.0350445	0.639062
CKS1B	1684.24	2723.11	905.078	0.332369	-1.58914	0.0350938	0.639062
RNASEH2A	1197.73	2159.03	476.744	0.220814	-2.1791	0.0351079	0.639062
NA	40.4305	18.7691	56.6766	3.01967	1.59439	0.0349841	0.639062
ATAD3A	2698	3854.26	1830.82	0.475011	-1.07397	0.0351868	0.639938
RSPO3	534.718	1024.4	167.459	0.163471	-2.61289	0.0351987	0.639938
EPN3	19.9907	10.4289	27.1621	2.60451	1.38101	0.0352688	0.640824
GKN2	1.21012	2.82362	0	0	#NAME?	0.0353883	0.64092
NA	1.75568	3.75981	0.252581	0.0671793	-3.89584	0.0353852	0.64092
CLEC1B	1.96475	4.58442	0	0	#NAME?	0.0353969	0.64092
TOMM40	3118.9	4493.32	2088.09	0.46471	-1.1056	0.0353389	0.64092
LOC100130111	19.0301	29.5133	11.1678	0.378397	-1.40203	0.0354024	0.64092
EMB	115.562	226.266	32.5337	0.143785	-2.79801	0.0353676	0.64092
NA	6.51195	13.8233	1.02844	0.0743994	-3.74857	0.0355728	0.641309
FBXL16	41.4223	68.6189	21.0248	0.306399	-1.70652	0.0355942	0.641309
NA	2.56589	0.271333	4.28682	15.7991	3.98177	0.0356308	0.641309
LINC01535	47.1561	71.9107	28.5902	0.397578	-1.33069	0.0354975	0.641309
NA	8.38586	13.8256	4.30609	0.311458	-1.68289	0.0354587	0.641309
OPN1SW	158.68	98.073	204.136	2.08147	1.0576	0.0355231	0.641309
HS3ST3B1	1583.96	2881.7	610.652	0.211907	-2.2385	0.0356378	0.641309
KLF5	751.446	205.591	1160.84	5.64633	2.49731	0.0355338	0.641309
NA	33.3305	48.9735	21.5982	0.441019	-1.18109	0.0355978	0.641309
RASD1	161.691	226.999	112.71	0.496523	-1.01007	0.0355545	0.641309
NA	175.065	108.473	225.01	2.07434	1.05265	0.0357222	0.642407
GABRG2	2.55808	5.62603	0.257111	0.0457002	-4.45165	0.0357599	0.642407
ERBB4	27.9357	48.8651	12.2386	0.250457	-1.99737	0.0357631	0.642407
NA	69.0507	103.816	42.9768	0.413972	-1.27239	0.03581	0.642864
OSCAR	89.0543	127.118	60.5065	0.475987	-1.07101	0.0359182	0.644421
XCR1	1.195	2.78834	0	0	#NAME?	0.0359881	0.644925
BBX	1937.42	1202.61	2488.53	2.06927	1.04912	0.0360108	0.644925
LRFN1	8.27438	13.5296	4.33299	0.320261	-1.64268	0.0360081	0.644925
PPFIA3	132.516	187.38	91.3689	0.487614	-1.03619	0.0360853	0.64574
KIR2DL3	10.4984	19.3541	3.85667	0.199269	-2.32721	0.0360994	0.64574
LRP2	34.3604	63.8501	12.2431	0.191748	-2.38272	0.0361273	0.645853
WDR54	803.293	1294.26	435.071	0.336155	-1.5728	0.036179	0.645919
NUP210	3.40799	6.25344	1.27391	0.203713	-2.29539	0.0361956	0.645919
NA	6732.91	3961.09	8811.77	2.22458	1.15353	0.0361595	0.645919
AJUBA	3875.36	2477.51	4923.74	1.98737	0.99086	0.0362551	0.646532
PRMT1	6773.82	9495.8	4732.33	0.498361	-1.00474	0.0362731	0.646532
ZDBF2	361.875	223.552	465.617	2.08281	1.05853	0.0363762	0.646723
LYPD1	7.55494	16.6142	0.760472	0.0457723	-4.44938	0.0363827	0.646723
CMKLR1	206.01	15.4448	348.934	22.5923	4.49776	0.0363916	0.646723
FAM149A	182.65	283.863	106.74	0.376028	-1.41109	0.036369	0.646723
NA	1.7625	3.77745	0.251288	0.0665232	-3.91	0.0363066	0.646723
NA	3.93396	1.03945	6.10485	5.87318	2.55414	0.036416	0.646772
MAGEA11	6.8688	16.0272	0	0	#NAME?	0.0364482	0.646961
P3H2	134	189.247	92.5644	0.489118	-1.03174	0.0366183	0.648704
B3GNT8	159.82	224.116	111.599	0.497949	-1.00593	0.036633	0.648704
RGPD1	2.35025	4.805	0.509184	0.10597	-3.23828	0.0366204	0.648704
MDS2	1.18044	2.75435	0	0	#NAME?	0.0365835	0.648704
ARL6IP1	2419.22	3357.57	1715.45	0.510919	-0.968832	0.0366892	0.648816
NCALD	246.152	342.263	174.069	0.508583	-0.975446	0.0367042	0.648816
CALCR	5.2312	9.17804	2.27106	0.247445	-2.01482	0.0366617	0.648816
ZCWPW2	39.1709	22.0159	52.0371	2.36362	1.241	0.0368009	0.648994
ADAM19	854.784	1447.74	410.07	0.283249	-1.81986	0.0367993	0.648994
PXDN	31595.8	20203.2	40140.3	1.98683	0.990468	0.0367732	0.648994
NA	486.023	302.604	623.587	2.06073	1.04316	0.0367743	0.648994
MPV17L	8.0154	3.18186	11.6406	3.65841	1.87122	0.0368294	0.649116
P3H3	4258.21	5926.77	3006.79	0.507323	-0.979024	0.0368533	0.649156
OXCT2	18.9691	10.094	25.6255	2.53869	1.34408	0.0368866	0.64936
NA	35.0428	20.0437	46.2921	2.30956	1.20762	0.0369685	0.650039
LCT	3.65476	7.15652	1.02844	0.143707	-2.79879	0.0369502	0.650039
NA	35.8105	20.1544	47.5525	2.35941	1.23842	0.0370801	0.651618
NSD2	3818.92	5335.53	2681.46	0.502567	-0.992611	0.037147	0.65211
SLC22A14	3.85396	0.900909	6.06875	6.73626	2.75195	0.0371515	0.65211
NA	3.84789	0.900909	6.05812	6.72446	2.74942	0.0372088	0.652732
TNFSF11	3.5154	7.17416	0.771333	0.107516	-3.21738	0.0372713	0.652851
EXOC3-AS1	152.378	215.42	105.096	0.487867	-1.03544	0.037288	0.652851
CPEB2-AS1	3.83798	0.883268	6.05401	6.8541	2.77697	0.0373026	0.652851
DLK2	37.4484	56.7003	23.0095	0.405809	-1.30113	0.0372746	0.652851
C1QL1	83.208	118.611	56.6559	0.477662	-1.06594	0.0373338	0.653014
MIR92B	5.76143	1.59975	8.88268	5.55254	2.47315	0.0373815	0.653467
RABL2A	256.768	162.844	327.21	2.00935	1.00673	0.0375723	0.655906
RAB1B	6215.37	9267.87	3926	0.423614	-1.23918	0.0376085	0.655906
GINS2	468.954	843.328	188.174	0.223132	-2.16403	0.0375473	0.655906
BRIP1	235.669	330.39	164.628	0.498284	-1.00496	0.0375974	0.655906
NA	80.6114	23.0112	123.812	5.3805	2.42774	0.037681	0.656788
TERT	5.90538	12.408	1.02844	0.0828858	-3.59273	0.0377337	0.657325
SOX17	2.29375	4.66646	0.514222	0.110195	-3.18187	0.0377895	0.657509
TIAM1	65.1172	98.2195	40.2904	0.410208	-1.28557	0.03781	0.657509
NA	1.87516	0	3.28153	Inf	Inf	0.0377922	0.657509
NA	1.15075	2.68509	0	0	#NAME?	0.0378538	0.657888
SPECC1	411.834	637.261	242.764	0.380949	-1.39233	0.0379137	0.658003
PCYT2	2967.07	4428.03	1871.35	0.422614	-1.24259	0.0379383	0.658003
MAPK12	1796.76	2505.8	1264.99	0.504824	-0.986148	0.0379482	0.658003
NA	78.8471	47.7235	102.19	2.14129	1.09848	0.0379201	0.658003
NA	5.04273	8.70692	2.29459	0.263536	-1.92393	0.0382399	0.658347
NA	39.5612	57.187	26.3419	0.460627	-1.11833	0.0381686	0.658347
TMEM92-AS1	15.8518	6.70304	22.7133	3.38851	1.76065	0.0381378	0.658347
PCBP3	230.411	144.607	294.763	2.03837	1.02742	0.038305	0.658347
LOC400002	93.4148	130.161	65.8552	0.505952	-0.982928	0.0382435	0.658347
NA	4.49267	1.38005	6.82714	4.94704	2.30656	0.0381703	0.658347
ADHFE1	63.3007	36.9965	83.0289	2.24424	1.16623	0.0383194	0.658347
NA	12.9617	4.95901	18.9637	3.8241	1.93512	0.0382793	0.658347
C6orf226	215.756	301.91	151.14	0.500615	-0.998228	0.0382185	0.658347
NA	15.4803	23.909	9.15875	0.383068	-1.38433	0.0382845	0.658347
SELPLG	220.885	309.7	154.274	0.49814	-1.00538	0.0382299	0.658347
ZFAND5	9943.13	5774.76	13069.4	2.26319	1.17836	0.0381421	0.658347
SPG20-AS1	9.37836	4.04749	13.3765	3.30489	1.7246	0.0383057	0.658347
AFDN-AS1	2.27317	4.63118	0.504654	0.108969	-3.19801	0.0382331	0.658347
ALX4	26.8173	59.8829	2.01806	0.0337002	-4.8911	0.0382194	0.658347
NA	17.9965	8.95487	24.7777	2.76695	1.4683	0.0380568	0.658347
NA	46.93	26.9101	61.9449	2.30192	1.20284	0.0383721	0.658497
APRT	2605.94	3646.17	1825.76	0.500734	-0.997883	0.0383502	0.658497
MYCL	13.1216	26.2079	3.3069	0.12618	-2.98645	0.0384217	0.658595
RUBCNL	26.3303	48.8285	9.45658	0.193669	-2.36833	0.0384181	0.658595
FIBCD1	360.57	703.502	103.371	0.146937	-2.76673	0.0385071	0.659305
LCK	2.26119	4.59719	0.509184	0.11076	-3.1745	0.0384956	0.659305
RFC3	384.313	538.997	268.3	0.497777	-1.00643	0.0386232	0.660711
PRADC1	1000.78	1517.5	613.247	0.404116	-1.30716	0.0386333	0.660711
AHCY	4397.35	6126.09	3100.79	0.50616	-0.982333	0.0387135	0.660952
NA	18.1991	6.7842	26.7603	3.9445	1.97984	0.0386866	0.660952
PTPRK	2953.66	1789.05	3827.12	2.13919	1.09706	0.0387112	0.660952
PLCXD1	419.09	585.295	294.437	0.503058	-0.991203	0.0387667	0.661108
HOXB6	150.846	268.488	62.6142	0.233211	-2.1003	0.0387618	0.661108
LINC02015	36.3938	11.6448	54.9555	4.71931	2.23858	0.0388189	0.661394
RAB6B	141.104	197.584	98.7438	0.499756	-1.0007	0.0388276	0.661394
PDZD11	1960.4	2733.5	1380.58	0.505062	-0.985469	0.038868	0.661706
PEAK1	7458.19	4625.58	9582.64	2.07166	1.05079	0.0389085	0.662019
PPP1R9A	18.1467	4.6184	28.2929	6.12611	2.61497	0.0391547	0.663113
NME4	9034.54	12835.6	6183.72	0.481762	-1.05361	0.0391719	0.663113
CIC	5954.61	8302.89	4193.4	0.505053	-0.985494	0.0389957	0.663113
PYHIN1	2.2315	4.52792	0.509184	0.112454	-3.15259	0.039161	0.663113
CLIC1	19111.3	27131.4	13096.2	0.482697	-1.05081	0.0391221	0.663113
AOX1	3800.16	1815.98	5288.29	2.91208	1.54205	0.0391203	0.663113
PROSER2-AS1	6.12938	2.12478	9.13283	4.29825	2.10375	0.0390258	0.663113
WBSCR17	1.53987	3.59303	0	0	#NAME?	0.0391314	0.663113
LOXL4	2684.93	790.742	4105.56	5.19204	2.3763	0.039117	0.663113
HYAL2	913.614	1273.03	644.055	0.505924	-0.983009	0.0392212	0.663199
EVC2	518.167	329.008	660.036	2.00614	1.00442	0.0392057	0.663199
TSPOAP1-AS1	10.9627	19.7939	4.33932	0.219225	-2.18952	0.0392528	0.663359
FPGT-TNNI3K	5.71127	1.85344	8.60464	4.64251	2.21491	0.0393277	0.663877
BEND5	10.8099	19.8345	4.04144	0.203758	-2.29507	0.0393098	0.663877
C6orf1	1752.66	2565.89	1142.75	0.445362	-1.16695	0.0393615	0.664073
ENO2	1200.08	1693.22	830.222	0.49032	-1.0282	0.0393863	0.664118
SCOC-AS1	14.199	21.9956	8.35156	0.379693	-1.39709	0.0395196	0.665108
B9D1	396.442	554.532	277.875	0.501099	-0.996832	0.039597	0.665108
LINC00865	29.2906	13.9505	40.7957	2.92433	1.54811	0.0395739	0.665108
POU5F1P4	3.92324	8.46859	0.514222	0.0607211	-4.04166	0.0395426	0.665108
ARRB2	367.091	609.676	185.152	0.303689	-1.71934	0.0395382	0.665108
KSR1	515.092	709.383	369.373	0.520696	-0.941486	0.0394802	0.665108
SEMA3A	607.861	999.897	313.834	0.313866	-1.67178	0.0396003	0.665108
NA	10.4682	4.88487	14.6557	3.00022	1.58507	0.0396429	0.665449
C5orf63	10.4437	4.85089	14.6384	3.01767	1.59343	0.0396949	0.66595
GADL1	3.99627	7.28931	1.52649	0.209415	-2.25556	0.0397417	0.666362
PLGRKT	524.398	729.714	370.411	0.507611	-0.978204	0.0398167	0.667172
HS1BP3	2291.07	3159.47	1639.76	0.519	-0.946195	0.0398345	0.667172
PSAT1	11460.1	6792.43	14960.9	2.20258	1.1392	0.0399185	0.668205
ABCB8	1278.11	1781.08	900.878	0.505803	-0.983351	0.039947	0.66831
BAALC	978.883	2061.47	166.942	0.0809817	-3.62626	0.0399932	0.66871
MEX3B	1591.89	2285.62	1071.6	0.468846	-1.09281	0.040049	0.66927
TIMD4	2.32305	5.07763	0.257111	0.0506361	-4.30369	0.0402014	0.670617
DCTN3	3809.29	5295.04	2694.97	0.508961	-0.974373	0.0402639	0.670617
RPLP0	79275.2	110768	55655.5	0.50245	-0.992947	0.040247	0.670617
PGP	1655.94	2551.28	984.439	0.385861	-1.37385	0.0401942	0.670617
PCDHA10	6.10728	10.1871	3.04743	0.299147	-1.74107	0.0402356	0.670617
ZDHHC12	851.124	1184.76	600.898	0.50719	-0.979402	0.0402533	0.670617
NA	40.7937	59.1093	27.0571	0.457747	-1.12738	0.0403003	0.670852
CCDC68	125.797	12.461	210.8	16.9168	4.08038	0.0403674	0.671595
LINC00886	254.041	100.522	369.18	3.67263	1.87681	0.0404961	0.672612
SPRY1	263.804	54.848	420.521	7.66702	2.93867	0.0405173	0.672612
NA	5.87678	10.0071	2.77905	0.277708	-1.84836	0.0405491	0.672612
SLC16A12	4.2625	7.58889	1.7677	0.232933	-2.10201	0.0404707	0.672612
NA	1.73909	0	3.04341	Inf	Inf	0.0405519	0.672612
PKP4	1853.25	1183	2355.94	1.9915	0.993858	0.0405631	0.672612
ALYREF	2053.14	3001.71	1341.71	0.446983	-1.16171	0.0406492	0.673667
NA	107.935	66.9102	138.704	2.07298	1.05171	0.0406814	0.673827
PIMREG	1058.87	2053.61	312.805	0.152319	-2.71483	0.0407983	0.673903
PLIN3	11740.5	16324	8302.84	0.508629	-0.975314	0.0407504	0.673903
NOD2	3.91276	7.07892	1.53814	0.217284	-2.20235	0.0407913	0.673903
FAM26E	980.161	610.664	1257.28	2.05888	1.04186	0.0407759	0.673903
LINC01587	1.73178	0	3.03061	Inf	Inf	0.0407388	0.673903
HOXB-AS3	112.53	254.432	6.10434	0.023992	-5.3813	0.0408554	0.674474
HDAC2-AS2	19.9526	10.4924	27.0477	2.57784	1.36616	0.0409001	0.674841
BCL11A	32.1918	57.0439	13.5528	0.237585	-2.07349	0.0409318	0.674991
MRGPRF	1648.26	2354.59	1118.5	0.475029	-1.07391	0.0410706	0.676414
KLF9	1289.41	805.722	1652.17	2.05055	1.03601	0.0410692	0.676414
SLC29A2	48.9503	25.987	66.1727	2.54638	1.34845	0.0410857	0.676414
LY75	16.2771	7.96705	22.5097	2.82534	1.49843	0.0412535	0.678803
KRT81	88.2348	150.344	41.6525	0.277047	-1.85179	0.0413275	0.679101
C1orf198	10384.8	5612.34	13964.2	2.48811	1.31505	0.0413622	0.679101
SEC14L5	9.00269	2.8589	13.6105	4.76075	2.25119	0.041354	0.679101
NA	57.5525	34.2183	75.0532	2.19336	1.13314	0.0413296	0.679101
PDE1C	323.689	534.534	165.555	0.309718	-1.69097	0.0414219	0.679607
NA	7.31141	2.89289	10.6253	3.6729	1.87692	0.0414383	0.679607
FKBP9	24589.1	15776.6	31198.6	1.97753	0.983697	0.0415108	0.679633
OLR1	52.8101	18.8448	78.284	4.15413	2.05455	0.0415952	0.679633
DISP3	3.09631	5.87398	1.01305	0.172464	-2.53563	0.041567	0.679633
NA	16.0545	5.90668	23.6654	4.00655	2.00236	0.0415208	0.679633
SLC35A3	1109.78	691.642	1423.38	2.05797	1.04122	0.0415025	0.679633
CCDC14	1390.83	878.777	1774.87	2.0197	1.01414	0.0415986	0.679633
NA	47.4338	27.3344	62.5083	2.2868	1.19333	0.0415679	0.679633
DNAH6	3.49341	6.46828	1.26226	0.195147	-2.35737	0.0416281	0.679744
TJP1	2701.82	1722.97	3435.97	1.99422	0.995823	0.0418081	0.68161
NLE1	702.471	992.585	484.886	0.488509	-1.03354	0.0418106	0.68161
TRH	4.76693	8.39586	2.04524	0.243601	-2.03741	0.0417947	0.68161
TNFAIP3	371.804	181.596	514.46	2.83299	1.50233	0.0418657	0.682139
ASL	1438.37	1986.46	1027.3	0.517149	-0.951347	0.0419448	0.68244
NDC80	473.146	738.858	273.863	0.370657	-1.43184	0.0419409	0.68244
TAL1	4.0715	7.78609	1.28556	0.165109	-2.59851	0.0419525	0.68244
NA	21.722	12.2951	28.7921	2.34176	1.22759	0.0421363	0.682467
NA	1.65851	3.53307	0.252581	0.0714906	-3.8061	0.0419903	0.682467
ADAM11	35.6995	55.5108	20.841	0.37544	-1.41335	0.0420912	0.682467
ADD3	4199.78	2668.99	5347.87	2.00371	1.00267	0.0421272	0.682467
NDUFB11	2966.33	4125.19	2097.19	0.508386	-0.976005	0.0420311	0.682467
PLPP3	22843.3	13912.8	29541.2	2.12331	1.08632	0.0420781	0.682467
EPB42	16.0656	8.47661	21.7574	2.56676	1.35995	0.042131	0.682467
RADIL	206.245	304.313	132.693	0.436043	-1.19746	0.0421185	0.682467
LOC101928103	2.10842	4.24956	0.502576	0.118266	-3.0799	0.0421617	0.68251
SPOCK1	6701.53	4365.86	8453.28	1.93622	0.953246	0.042189	0.682583
MIIP	959.9	1341.79	673.478	0.501924	-0.99446	0.0423138	0.683864
AP3B2	20.6524	33.0501	11.3542	0.343544	-1.54143	0.0423098	0.683864
NA	10.759	4.80986	15.2209	3.16452	1.66199	0.0424187	0.68519
RPS15	23978	33421.5	16895.3	0.505523	-0.984152	0.0424918	0.685368
CKAP2	1473.27	2035.81	1051.37	0.516438	-0.953333	0.0425212	0.685368
BST1	888.029	532.401	1154.75	2.16895	1.117	0.0424774	0.685368
RORA	433.055	269.592	555.652	2.06108	1.0434	0.0425168	0.685368
NUDT8	187.668	295.086	107.104	0.362958	-1.46212	0.0426083	0.686403
UBA52	29896.2	41536	21166.4	0.509591	-0.972589	0.0427537	0.687025
NA	11.9928	5.99488	16.4912	2.75088	1.45989	0.0429339	0.687025
LOC101927550	43.8123	25.9623	57.1998	2.20319	1.13959	0.0429117	0.687025
CLN6	666.2	922.529	473.953	0.513754	-0.96085	0.0427902	0.687025
STK32C	934.484	1295.17	663.969	0.51265	-0.963955	0.0427177	0.687025
NA	2.57557	5.00003	0.757235	0.151446	-2.72312	0.042952	0.687025
NA	79.6142	49.8417	101.944	2.04535	1.03235	0.0427283	0.687025
NAT14	1077.73	1564.8	712.429	0.455286	-1.13516	0.0429677	0.687025
EXO1	186.325	273.004	121.316	0.444374	-1.17015	0.0427832	0.687025
LOC102724360	7.74549	12.6652	4.05568	0.320222	-1.64286	0.0429565	0.687025
RBPMS	2258.8	1484.78	2839.31	1.91227	0.935287	0.0427947	0.687025
SLC45A2	3.01549	5.66488	1.02844	0.181547	-2.46158	0.0429664	0.687025
ST14	3.25748	6.58788	0.759687	0.115316	-3.11634	0.0428929	0.687025
TMEM141	1173.51	1627.73	832.844	0.511659	-0.966746	0.0429201	0.687025
NET1	680.736	932.699	491.764	0.527248	-0.923446	0.0430527	0.687666
GOLGA8A	322.807	153.148	450.051	2.93866	1.55516	0.0431272	0.687666
SLC24A4	4.07159	8.82683	0.505163	0.0572304	-4.12708	0.0432087	0.687666
EPHB3	856.976	1182.19	613.068	0.518587	-0.947341	0.0431875	0.687666
TPPP	6.37379	11.8257	2.28489	0.193214	-2.37173	0.043084	0.687666
GRIK4	5.15233	8.95833	2.29782	0.256501	-1.96296	0.0431671	0.687666
MPDU1	1520.45	2105.89	1081.37	0.513498	-0.961569	0.0431265	0.687666
PMM1	1578.97	2189.22	1121.27	0.512179	-0.96528	0.0432142	0.687666
TIMELESS	909.132	1265.05	642.194	0.507643	-0.978113	0.0431006	0.687666
TTC38	954.86	1323.48	678.398	0.512587	-0.964131	0.0432439	0.687773
NEO1	3410.2	1878.82	4558.74	2.42638	1.27881	0.0432769	0.687932
GATA6-AS1	14.1717	6.81245	19.6911	2.89046	1.5313	0.0433539	0.688792
FOXF2	1024.11	1495.36	670.669	0.4485	-1.15682	0.0433801	0.688843
ORC6	393.937	567.717	263.602	0.464318	-1.10681	0.0434781	0.689988
RFC5	397.189	554.096	279.508	0.504439	-0.987247	0.0434982	0.689988
LINC00304	8.78225	3.3204	12.8786	3.87864	1.95555	0.0438149	0.691873
LRP4-AS1	7.62626	12.3869	4.05582	0.327429	-1.61075	0.0436994	0.691873
MS4A1	6.44597	13.3265	1.28556	0.096466	-3.37384	0.0438248	0.691873
IMPDH1	4503.08	6231.49	3206.78	0.514609	-0.958451	0.0437226	0.691873
PRDM16	40.157	57.4002	27.2245	0.474293	-1.07615	0.0437841	0.691873
NECTIN1	462.72	640.113	329.675	0.515026	-0.957284	0.0438238	0.691873
BCL2L12	928.808	1454.61	534.457	0.367423	-1.44449	0.0436417	0.691873
CDH24	440.558	709.538	238.823	0.336589	-1.57094	0.0437405	0.691873
NA	125.457	72.0929	165.479	2.29536	1.19872	0.0436855	0.691873
MIR137HG	77.5486	107.255	55.2687	0.515301	-0.956514	0.043882	0.692411
NA	2.58625	5.34896	0.514222	0.096135	-3.37879	0.0439336	0.692668
HCFC1R1	2207.67	3262.38	1416.63	0.434231	-1.20347	0.0439676	0.692668
CCDC170	168.052	88.1439	227.984	2.5865	1.371	0.0439448	0.692668
FRRS1	105.424	153.62	69.2768	0.450961	-1.14893	0.0440521	0.693635
DTX4	211.432	69.4347	317.929	4.57882	2.19498	0.0441123	0.693854
LAGE3	1143.59	1581.9	814.862	0.515116	-0.957031	0.0441085	0.693854
IRF8	1.76073	3.76555	0.257111	0.0682798	-3.8724	0.0441846	0.694264
IKZF1	11.9801	23.5158	3.32835	0.141537	-2.82075	0.0441807	0.694264
NA	18.3415	9.764	24.7747	2.53735	1.34332	0.0442556	0.695014
DDIAS	109.24	153.571	75.9915	0.49483	-1.015	0.0442889	0.695173
NCLN	5716.59	7998.22	4005.36	0.500782	-0.997747	0.0443194	0.695288
NA	73.4666	44.7883	94.9754	2.12054	1.08443	0.0443691	0.695704
HGFAC	5.04872	1.25915	7.8909	6.26684	2.64774	0.044474	0.69589
CFAP69	144.098	90.6891	184.155	2.03062	1.02192	0.0445779	0.69589
TSC22D3	1909.16	1040.52	2560.64	2.46092	1.2992	0.0446363	0.69589
S100A3	668.527	931.503	471.295	0.505952	-0.982929	0.044631	0.69589
NPC2	5586.64	7559.38	4107.08	0.543308	-0.880157	0.0446256	0.69589
NA	23.1714	12.5642	31.1267	2.4774	1.30883	0.0446224	0.69589
ZG16B	4.91685	0.716485	8.06713	11.2593	3.49305	0.0445154	0.69589
IFI44L	60.9436	37.4109	78.5931	2.10081	1.07094	0.0444595	0.69589
NA	6.02696	2.21169	8.88842	4.01884	2.00678	0.0444365	0.69589
NEIL1	155.831	90.6092	204.747	2.25967	1.17611	0.0446103	0.69589
ISOC2	2205.43	3111.55	1525.84	0.49038	-1.02803	0.0444708	0.69589
LSM2	736.825	1103.31	461.959	0.418702	-1.256	0.0447442	0.696504
CXADRP3	2.76039	0.358242	4.562	12.7344	3.67066	0.0447445	0.696504
KRTAP2-2	2.43458	0.271333	4.05702	14.9522	3.90228	0.0447454	0.696504
NA	8.19718	3.60938	11.638	3.22439	1.68903	0.044817	0.697256
DANCR	816.678	1130.62	581.22	0.514072	-0.959958	0.044853	0.697428
SLC17A3	1.7386	3.71393	0.257111	0.0692289	-3.85248	0.0448745	0.697428
ZC2HC1C	23.6855	34.9347	15.2487	0.43649	-1.19598	0.0450567	0.699797
NA	8.35317	13.3583	4.59929	0.344302	-1.53825	0.045097	0.699797
ELANE	51.4928	19.0793	75.8029	3.97305	1.99025	0.0450933	0.699797
LOC100506679	4.94301	1.75593	7.33333	4.17632	2.06223	0.0451635	0.700104
UBE2S	6540.61	11790.5	2603.22	0.220791	-2.17925	0.0451533	0.700104
NA	12.3561	6.21459	16.9622	2.72942	1.44859	0.0452472	0.700677
PYCR3	874.528	1352.14	516.318	0.381852	-1.38892	0.0452259	0.700677
MAGI2-AS3	1713.26	1100.7	2172.67	1.9739	0.981049	0.0452797	0.700819
ARHGEF35	104.361	62.9734	135.401	2.15014	1.10443	0.0453927	0.702205
SLC47A2	12.5748	2.44774	20.1701	8.24031	3.0427	0.0458431	0.702437
FMO2	146.485	1.628	255.127	156.712	7.29197	0.0458406	0.702437
PKMYT1	756.427	1493.22	203.835	0.136507	-2.87295	0.0455406	0.702437
DCDC1	1.20558	2.81302	0	0	#NAME?	0.0456836	0.702437
NA	364.367	229.363	465.62	2.03006	1.02152	0.0458114	0.702437
CENPK	293.725	429.623	191.802	0.446443	-1.16345	0.0458944	0.702437
ANKRD19P	4.86674	1.56447	7.34344	4.69388	2.23078	0.0457514	0.702437
PSMD2	11966.2	16461.8	8594.47	0.522085	-0.937643	0.0457673	0.702437
TECR	1922.58	2718.83	1325.39	0.487486	-1.03657	0.0458609	0.702437
STC1	2577.07	1003.33	3757.37	3.74489	1.90492	0.0458556	0.702437
TAP1	1380.59	1896.86	993.384	0.523698	-0.933193	0.0455854	0.702437
IL18	23.518	39.3514	11.6429	0.295871	-1.75696	0.0455869	0.702437
NA	13.8056	22.4543	7.31905	0.325953	-1.61726	0.0457217	0.702437
SGO2	451.333	640.233	309.658	0.483665	-1.04792	0.0454707	0.702437
CPEB2	904.782	575.221	1151.95	2.00263	1.00189	0.0455328	0.702437
PROSER2	237.715	59.5033	371.374	6.24123	2.64183	0.0458057	0.702437
IFIT1	325.229	485.835	204.775	0.421492	-1.24642	0.0454519	0.702437
PYGO1	415.401	265.105	528.123	1.99213	0.994311	0.0457663	0.702437
OGT	4454.34	2867.01	5644.84	1.96889	0.977385	0.0456322	0.702437
NA	7.54762	12.5453	3.79936	0.302851	-1.72332	0.0458998	0.702437
NA	3512.52	4849.76	2509.59	0.517466	-0.950463	0.0456582	0.702437
RXRG	5.14511	9.60555	1.79978	0.187369	-2.41605	0.0459442	0.702759
NA	11.134	18.9221	5.29299	0.279725	-1.83792	0.045968	0.702765
NA	1.19802	2.79538	0	0	#NAME?	0.0460238	0.703032
CCNYL1	1327.83	867.047	1673.42	1.93002	0.948617	0.0460324	0.703032
MAP4K2	517.663	725.386	361.87	0.498866	-1.00328	0.0460943	0.703618
LOC101929439	18.0635	1.87109	30.2078	16.1445	4.01297	0.0461606	0.704273
PIK3C2G	11.5689	22.8804	3.08533	0.134846	-2.89062	0.0462038	0.704516
TLR2	25.5798	8.91602	38.0777	4.2707	2.09447	0.0462471	0.704516
MRPS12	1313.57	1846.38	913.958	0.495	-1.0145	0.0462242	0.704516
POLR3G	103.568	143.421	73.6791	0.513726	-0.960928	0.0462896	0.704806
SMS	4079.19	5607.24	2933.15	0.523101	-0.93484	0.0464174	0.705077
TNFRSF8	3.82247	7.89064	0.771333	0.0977529	-3.35472	0.0463852	0.705077
RILP	348.392	501.037	233.907	0.466847	-1.09898	0.0464485	0.705077
UBTD1	2456.95	3522.59	1657.72	0.470597	-1.08744	0.0463672	0.705077
LEPR	1711.65	306.531	2765.49	9.0219	3.17343	0.0463557	0.705077
PHKA1	144.923	93.5282	183.469	1.96164	0.972059	0.0464347	0.705077
AFAP1	5887.16	3686.56	7537.62	2.04462	1.03183	0.046602	0.705078
MRPL52	1747.54	2457.45	1215.1	0.494456	-1.01609	0.046618	0.705078
ANXA6	21409.1	29064	15668	0.539084	-0.891417	0.0465652	0.705078
CCDC74B	237.021	327.526	169.143	0.516426	-0.953365	0.0465286	0.705078
GTPBP6	2047.99	3023.99	1316	0.435186	-1.2003	0.0466368	0.705078
MARCKSL1	1415.26	2686.84	461.577	0.171792	-2.54127	0.0465666	0.705078
MSMO1	3543.88	4754.89	2635.62	0.554296	-0.85127	0.0465908	0.705078
NA	13.9896	21.1617	8.61051	0.40689	-1.29729	0.0465963	0.705078
S100A16	10859	15329.5	7506.09	0.48965	-1.03018	0.0466903	0.705532
CENPN	566.269	810.147	383.361	0.473199	-1.07948	0.0467233	0.705674
GMNN	469.488	647.631	335.882	0.518631	-0.947218	0.0468588	0.706298
IL1RL1	89.728	26.9789	136.79	5.07025	2.34206	0.046789	0.706298
PALM3	13.4291	24.2371	5.32312	0.219627	-2.18687	0.0468425	0.706298
NA	2.87878	0	5.03786	Inf	Inf	0.0468519	0.706298
CHST8	1.67635	3.57539	0.252072	0.0705021	-3.82619	0.0469301	0.706307
CLSTN2	23.7697	9.3709	34.5688	3.68895	1.88321	0.0469201	0.706307
SSNA1	4569.14	6769.82	2918.62	0.431122	-1.21383	0.0469026	0.706307
FAT4	2503.5	1574.78	3200.03	2.03205	1.02294	0.0471667	0.707061
GUCA1A	1.67111	3.55645	0.257111	0.0722943	-3.78998	0.0471111	0.707061
CDK5	788.565	1121.47	538.885	0.480516	-1.05734	0.0470383	0.707061
C3orf14	490.142	674.814	351.639	0.52109	-0.940396	0.0470546	0.707061
CTAG2	22.8763	53.3781	0	0	#NAME?	0.0471689	0.707061
NA	26.3394	40.1844	15.9557	0.397061	-1.33257	0.0471026	0.707061
EVL	1558.92	2146.9	1117.93	0.520719	-0.941422	0.047095	0.707061
[truncated: 46,163 more rows]

## Sheet: p-adj<0.05
Gene	Average-all	Average-CEP78	Average-WT	foldChange	log2FoldChange	p-value	p-value_adjusted
ADORA1	57.7452	129.653	3.81451	0.029421	-5.08701	2.22409e-16	6.54003e-12
TNIK	258.036	560.744	31.0049	0.0552924	-4.17677	4.36293e-16	6.54003e-12
ADD2	18.4265	42.3215	0.505163	0.0119363	-6.3885	1.42514e-12	1.42419e-08
DDIT4L	172.495	359.216	32.4538	0.0903463	-3.46839	1.02513e-11	7.68333e-08
ADGRG1	41.0559	88.0125	5.83854	0.0663376	-3.91403	1.18412e-10	5.92725e-07
PDK3	48.8522	103.512	7.85712	0.0759051	-3.71966	1.18624e-10	5.92725e-07
LMO7DN	40.8339	3.14084	69.1036	22.0016	4.45954	7.05291e-10	3.02066e-06
SDC1	3178.62	6284.79	848.989	0.135086	-2.88805	1.21123e-09	4.5391e-06
DIRAS3	51.0499	111.991	5.3441	0.047719	-4.38929	2.64622e-09	8.81485e-06
PLEK2	281.805	554.186	77.5192	0.139879	-2.83774	6.64034e-09	1.99077e-05
IL13RA2	477.869	1045.14	52.4162	0.0501523	-4.31754	9.5592e-09	2.60532e-05
GPAT3	52.6395	108.982	10.3825	0.0952678	-3.39187	1.29752e-08	3.24164e-05
HLA-DPB1	193.032	378.155	54.1891	0.143299	-2.8029	1.5808e-08	3.64556e-05
PRICKLE1	228.88	41.5672	369.365	8.88596	3.15153	2.32323e-08	4.97503e-05
ISLR	8985.26	17316	2737.2	0.158074	-2.66133	2.95829e-08	5.91263e-05
RXFP1	95.9834	16.655	155.48	9.33529	3.2227	4.0805e-08	7.19608e-05
ZDHHC15	15.585	34.3485	1.51239	0.0440308	-4.50534	3.9848e-08	7.19608e-05
GBP5	64.7654	147.368	2.81362	0.0190925	-5.71085	4.73042e-08	7.87878e-05
TMTC1	3310.08	624.188	5324.5	8.53029	3.0926	9.67953e-08	0.000152733
CMTM8	52.5076	7.52319	86.246	11.464	3.51904	1.33472e-07	0.000200074
NA	39.033	6.17801	63.6742	10.3066	3.36549	1.8105e-07	0.000258471
MKX	2009.78	423.318	3199.63	7.55846	2.91809	2.13397e-07	0.000290801
COL4A5	1361.05	68.532	2330.45	34.0053	5.08769	5.10322e-07	0.000665193
GRIN2A	30.7749	68.3799	2.57111	0.0376004	-4.73311	5.5675e-07	0.000695473
NA	66.0423	125.518	21.4357	0.170778	-2.5498	1.02797e-06	0.00119871
NTRK3	20.4078	43.8886	2.79716	0.0637333	-3.97181	1.03958e-06	0.00119871
FLG-AS1	63.1774	15.1681	99.1844	6.53903	2.70908	1.39069e-06	0.00154418
HOMER2	222.279	470.112	36.4038	0.0774364	-3.69084	1.50441e-06	0.00155525
LMO7DN-IT1	14.7027	1.25915	24.7853	19.6841	4.29896	1.49383e-06	0.00155525
RAC2	447.356	851.989	143.882	0.168878	-2.56595	1.56728e-06	0.00156623
HHIP-AS1	38.5567	6.77272	62.3947	9.21265	3.20362	1.68835e-06	0.0016328
FAM46C	37.1625	74.7853	8.94546	0.119615	-3.06353	1.85238e-06	0.00173545
BTBD11	30.0025	64.5343	4.1037	0.0635895	-3.97507	1.96053e-06	0.00178111
NA	243	445.307	91.2693	0.204958	-2.2866	2.05754e-06	0.00181427
NA	23.477	46.6426	6.10272	0.13084	-2.93412	2.38626e-06	0.00198968
ANK1	149.441	39.0824	232.21	5.94154	2.57084	2.3892e-06	0.00198968
NDN	1649.51	2980.2	651.483	0.218604	-2.19361	3.05746e-06	0.00247737
ACTG2	8.04315	18.7673	0	0	#NAME?	3.25788e-06	0.00257029
CYP39A1	44.3354	9.72872	70.2904	7.22504	2.853	3.62045e-06	0.00278311
SMO	352.528	635.081	140.613	0.22141	-2.17521	4.36365e-06	0.00319079
FRMPD3	41.2978	78.3311	13.5229	0.172637	-2.53419	4.32574e-06	0.00319079
FCRLA	41.6577	79.2638	13.4532	0.169727	-2.55872	4.9005e-06	0.00341667
NA	173.38	314.612	67.4565	0.214412	-2.22155	4.85022e-06	0.00341667
MYH2	109.667	5.5652	187.743	33.7351	5.07618	5.29899e-06	0.00361054
SERPINI1	168.275	48.3868	258.192	5.336	2.41576	6.57215e-06	0.00437851
BCL11B	66.0614	149.718	3.31929	0.0221703	-5.49523	6.99369e-06	0.00451924
FAM19A5	2781.45	6143.29	260.067	0.0423336	-4.56205	7.08487e-06	0.00451924
PNLDC1	15.0606	30.4152	3.5446	0.11654	-3.1011	7.98048e-06	0.00498448
HLA-DPA1	85.6325	172.5	20.4818	0.118735	-3.07418	9.61243e-06	0.00588124
CDCP1	70.9389	153.022	9.37658	0.0612761	-4.02853	1.04398e-05	0.00613695
RPS6KA1	47.8532	88.6073	17.2877	0.195104	-2.35768	1.03787e-05	0.00613695
NA	45.3825	83.8774	16.5113	0.19685	-2.34483	1.07012e-05	0.00616968
SVEP1	9763.78	1793.03	15741.8	8.77948	3.13414	1.10401e-05	0.00624492
PCDHGC5	34.8684	65.7837	11.6818	0.177579	-2.49346	1.21969e-05	0.00677155
SOBP	57.6287	111.375	17.3188	0.155499	-2.68502	1.29857e-05	0.00683001
IGF2BP3	589.915	198.469	883.5	4.45158	2.15432	1.26771e-05	0.00683001
TNFRSF11B	15878.8	4776.81	24205.3	5.06726	2.34121	1.27588e-05	0.00683001
SST	6.32861	14.0956	0.503361	0.0357105	-4.80751	1.4987e-05	0.00774674
TSPAN13	509.117	894.066	220.405	0.24652	-2.02022	1.67857e-05	0.00852941
FABP5	236.265	419.344	98.9557	0.235977	-2.08328	1.81647e-05	0.00907628
CALB2	48.9151	94.8472	14.4661	0.15252	-2.71293	1.90466e-05	0.00936096
EPHB2	461.283	895.625	135.526	0.15132	-2.72432	1.94367e-05	0.0093986
ADCY1	41.9725	77.3077	15.4711	0.200124	-2.32104	1.99515e-05	0.0094944
GNAZ	20.5443	39.491	6.33423	0.160397	-2.64028	2.1555e-05	0.0100972
MYH1	55.1868	2.59818	94.6283	36.421	5.1867	2.2657e-05	0.0102918
MATN2	1031.61	1870.95	402.102	0.214919	-2.21814	2.23236e-05	0.0102918
ECM2	921.869	296.029	1391.25	4.69971	2.23257	2.31876e-05	0.0103756
RNF144B	525.132	165.362	794.96	4.80741	2.26526	2.40287e-05	0.0105938
ZNF492	7.56952	16.2909	1.02844	0.0631298	-3.98553	2.52621e-05	0.0109762
CNR1	140.12	0.340602	244.955	719.183	9.49022	2.57176e-05	0.0110145
IL34	131.085	6.98627	224.159	32.0857	5.00386	2.64495e-05	0.0111684
OGDHL	10.4676	22.7103	1.28556	0.0566067	-4.14288	2.74487e-05	0.0114293
CDKN3	637.688	1122	274.455	0.244613	-2.03143	2.94224e-05	0.0120833
DEPDC1B	105.211	188.327	42.8736	0.227655	-2.13508	3.06623e-05	0.0124224
FRMD5	96.6152	183.525	31.4329	0.171274	-2.54563	3.23917e-05	0.0127081
HAND2-AS1	436.594	162.232	642.365	3.95956	1.98534	3.22013e-05	0.0127081
CYBA	6269.37	11024.9	2702.68	0.245142	-2.02831	3.26393e-05	0.0127081
GAL	44.2269	102.523	0.504654	0.00492234	-7.66644	3.62738e-05	0.0139421
RTN1	1208.2	31.9163	2090.41	65.4966	6.03335	3.73696e-05	0.0141815
TRPC6	1027.78	73.0093	1743.86	23.8854	4.57806	3.85974e-05	0.0144644
COL8A1	65476.2	10724.8	106540	9.93397	3.31237	4.03107e-05	0.01492
CNIH3	555.463	959.77	252.232	0.262805	-1.92794	4.11452e-05	0.0150431
NA	652.745	238.152	963.689	4.04653	2.01669	4.23091e-05	0.0152822
KCNJ12	74.8203	143.73	23.1378	0.160981	-2.63504	4.36059e-05	0.0155632
CSMD2	643.749	1296.6	154.112	0.118859	-3.07268	4.51054e-05	0.0159089
NA	103.696	25.4682	162.367	6.37528	2.67249	4.62612e-05	0.0161269
SIPA1L2	1240.09	352.949	1905.45	5.39865	2.4326	4.73688e-05	0.0161377
CFAP46	18.7568	35.9614	5.85328	0.162766	-2.61913	4.70249e-05	0.0161377
RBPMS2	11.8776	23.6496	3.04849	0.128902	-2.95565	4.80338e-05	0.0161804
THBS1	311694	109459	463370	4.23326	2.08177	5.08304e-05	0.0169322
TGM5	5.64341	0	9.87596	Inf	Inf	5.29218e-05	0.0174351
NFASC	2615.77	4620.38	1112.32	0.240742	-2.05444	5.51045e-05	0.0179569
IGSF3	413.935	20.8768	708.729	33.9482	5.08526	5.6376e-05	0.0181737
MT2A	11045.3	19354.2	4813.57	0.248709	-2.00747	5.78557e-05	0.0184523
CD22	20.6643	38.7335	7.11245	0.183625	-2.44516	5.94953e-05	0.0187755
SEMA6B	42.5014	85.6458	10.143	0.11843	-3.07789	6.15349e-05	0.0192168
PDE5A	1182	413.474	1758.39	4.25271	2.08838	6.72062e-05	0.0205596
BUB1	720.194	1262.98	313.104	0.247908	-2.01212	6.71467e-05	0.0205596
PTK2B	1084.19	237.504	1719.21	7.23866	2.85572	7.52268e-05	0.0219229
CDIP1	1062.36	1814.19	498.495	0.274776	-1.86367	7.41172e-05	0.0219229
KCNN4	61.7571	121.102	17.2484	0.142429	-2.81168	7.50363e-05	0.0219229
CARD11	11.2967	24.3099	1.53684	0.0632187	-3.9835	7.27708e-05	0.0219229
PPP1R14C	25.67	5.98785	40.4316	6.75228	2.75537	7.53189e-05	0.0219229
BACH2	17.6729	33.7855	5.58841	0.165408	-2.5959	7.72898e-05	0.0222803
ATP1A2	13.545	0.340602	23.4483	68.8439	6.10526	7.93454e-05	0.022655
NA	22.9432	2.31624	38.4135	16.5844	4.05176	8.20391e-05	0.0232031
NA	18.8206	4.48204	29.5745	6.59844	2.72213	8.84342e-05	0.0247244
OSR2	2763	931.721	4136.46	4.43959	2.15043	8.90671e-05	0.0247244
MFSD6	447.989	163.775	661.149	4.03693	2.01326	9.05441e-05	0.0249038
PLPP4	473.454	802.873	226.389	0.281974	-1.82637	9.61849e-05	0.0262148
TMEM178A	18.4536	3.87367	29.3886	7.58675	2.92348	9.79368e-05	0.0264518
MYH3	88.6813	30.6967	132.17	4.30566	2.10623	9.89681e-05	0.0264916
MYOZ3	20.6613	38.6945	7.13639	0.184429	-2.43886	0.000102409	0.0271702
PARD3B	1765.55	565.064	2665.91	4.71789	2.23814	0.000108127	0.0284354
KRT86	46.2102	14.1464	70.2581	4.96652	2.31223	0.000110466	0.028798
CEP78	561.946	223.185	816.017	3.65624	1.87036	0.00011755	0.0298656
TM6SF2	31.2674	9.05455	47.927	5.29313	2.40412	0.000117402	0.0298656
ZNF208	13.4676	25.9716	4.0896	0.157464	-2.6669	0.000115874	0.0298656
DPYSL3	2710.37	4582.7	1306.12	0.285011	-1.81091	0.000123041	0.02999
MCHR1	16.4625	34.3236	3.06671	0.0893467	-3.48444	0.000120446	0.02999
PLAG1	389.608	149.885	569.399	3.7989	1.92558	0.000122029	0.02999
CACNA1D	13.1156	25.4985	3.82847	0.150145	-2.73557	0.000122884	0.02999
PPP4R4	28.0195	6.82435	43.9159	6.43518	2.68598	0.000120452	0.02999
NHSL2	93.4222	160.277	43.2812	0.27004	-1.88875	0.00012975	0.0310522
CCL26	26.2792	47.7588	10.1695	0.212935	-2.23151	0.000129547	0.0310522
NA	22.3034	5.45708	34.9382	6.40236	2.6786	0.000130506	0.0310522
ACKR3	1379.03	541.909	2006.87	3.70334	1.88883	0.000135725	0.0320396
SLC25A27	186.357	65.7813	276.789	4.20772	2.07304	0.000137637	0.0322371
ADAMTS1	16769	6498.41	24472	3.76584	1.91297	0.000141583	0.0329043
NA	13.0667	25.0473	4.08119	0.162939	-2.61759	0.000154005	0.0355159
CABLES1	1071.23	1792.33	530.396	0.295925	-1.7567	0.000159734	0.0365559
ECSCR	10.7472	22.3343	2.05689	0.0920955	-3.44073	0.00016222	0.0368436
CACNA1A	311.29	587.121	104.417	0.177846	-2.4913	0.000176685	0.0389486
APOBEC3B	271.381	492.927	105.221	0.213462	-2.22795	0.000176188	0.0389486
SCARA3	3714.44	6232.28	1826.06	0.292999	-1.77103	0.000176097	0.0389486
COL17A1	8.74025	17.6816	2.03424	0.115048	-3.11969	0.000174115	0.0389486
ATP2A3	185.17	340.342	68.7903	0.202121	-2.30671	0.000179685	0.0393208
KLF3-AS1	19.8235	4.70531	31.1621	6.62275	2.72743	0.000192789	0.0418827
HSPB8	897.887	1484.33	458.052	0.308591	-1.69623	0.000204991	0.0442131
WFDC21P	118.948	46.7175	173.121	3.70569	1.88974	0.000209316	0.0444038
COL9A2	321.066	110.532	478.966	4.33326	2.11545	0.000211084	0.0444038
MVK	984.025	1639.04	492.766	0.300643	-1.73388	0.000207358	0.0444038
PLCG2	34.7274	68.1193	9.68342	0.142154	-2.81447	0.000214165	0.0444038
NA	101.699	35.6072	151.267	4.24822	2.08686	0.000214762	0.0444038
ULBP1	488.766	193.277	710.382	3.67546	1.87792	0.000213437	0.0444038
SGCA	158.315	268.777	75.4693	0.280788	-1.83245	0.000217345	0.0446301
NA	120.704	42.863	179.084	4.17806	2.06283	0.000220475	0.0449649
HHIP	57.5403	7.14157	95.3393	13.3499	3.73876	0.000222551	0.0450817
SHANK2	272.764	22.1543	460.721	20.796	4.37823	0.000226157	0.0455047
HMMR	397.127	688.515	178.585	0.259377	-1.94688	0.000235625	0.046548
SLC6A17	110.418	241.797	11.8831	0.0491451	-4.34681	0.000233107	0.046548
PTENP1	6.09467	12.8496	1.02844	0.0800368	-3.64319	0.000236	0.046548
LINC00968	711.22	137.691	1141.37	8.28936	3.05126	0.000240279	0.0470821
POU2F2	162.553	273.676	79.2104	0.289431	-1.78871	0.000243316	0.0473677
CTGF	45656.9	14253.4	69209.5	4.85566	2.27967	0.000247122	0.0477983
TESMIN	17.0722	31.6721	6.12227	0.193302	-2.37107	0.000251144	0.0482648
STARD8	198.901	368.565	71.6523	0.194409	-2.36283	0.000254142	0.0485298
HHIPL2	32.3032	58.3359	12.7787	0.219054	-2.19064	0.000255766	0.0485307
CCNA2	1414.84	2353.84	710.598	0.301889	-1.72791	0.000258806	0.0487987
KIF21B	8.3079	16.6553	2.04732	0.122923	-3.02418	0.00026209	0.0491091
SCN9A	130.733	41.3723	197.754	4.77987	2.25697	0.000263903	0.0491417
